# Supplementary material for: Proteomic analysis reveals mechanisms underlying increased efficacy of bleomycin by photochemical internalization in bladder cancer cells
Source: Royal Society of Chemistry journal article supplement (doi:10.1039/d2mo00337f), 2023-06-22
Supplement: d2mo00337f1.pdf [file d2mo00337f1.pdf]

Please use  
files tab to  
view  
Supplementar  
y Table S1  
(Excel file).
