# Supplementary material for: Proteomic analysis reveals mechanisms underlying increased efficacy of bleomycin by photochemical internalization in bladder cancer cells
Source: Royal Society of Chemistry journal article supplement (doi:10.1039/d2mo00337f), 2023-06-22
Supplement: d2mo00337f3.xlsx [file d2mo00337f3.xlsx]

## Sheet: proteinGroupsTotalTtestMedian
T: Uniprot Protein ID	T: Uniprot Protein Ids	T: Gene name	T: ENSG	C: Protein name	60107_Exp2_PDT_total	60212_Exp3_PDT_total_b	60822_SILAC2_bleomycinH_Odrun	60822_SILAC3_bleomycinH_Odrun	60822_SILAC4_bleomycinH_Odrun	60107_Exp1_PCI_total	60107_Exp2_PCI_total	60212_Exp3_PCI_total_b	N: PDT median	N: T-test p-value PDT	N: BLM median	N: T-test p-value BLM	N: PCI median	N: T-test p-value PCI	N: T-test q-value PCI	N: T-test Difference PCI	N: T-test q-value PDT	N: T-test Difference PDT	N: T-test q-value BLM	N: T-test Difference BLM	N: Base pair index	N: stddev PCI	N: stddev PDT	N: stddev BLM	N: Peptides	N: Razor + unique peptides	N: Unique peptides	N: Sequence coverage [%]	N: Unique + razor sequence coverage [%]	N: Unique sequence coverage [%]	N: Mol. weight [kDa]	N: Q-value	N: Score	N: Intensity	N: Intensity L	N: Intensity H	N: Peptides 60107_Exp1_PCI_total_tech1	N: Peptides 60107_Exp1_PCI_total_tech1_160117043121	N: Peptides 60107_Exp2_PCI_total_tech1	N: Peptides 60107_Exp2_PCI_total_tech1_160116112742	N: Peptides 60107_Exp2_PDT_total_tech1	N: Peptides 60107_Exp2_PDT_total_tech1_160117101256	N: Peptides 60212_Exp3_PCI_total_b_tech1	N: Peptides 60212_Exp3_PCI_total_b_tech2	N: Peptides 60212_Exp3_PDT_total_b_tech1
A0A0G2K724	A0A0G2K724;Q4G009	Mcts1	ENSRNOG00000002563	Malignant T-cell-amplified sequence 1	-0.853631	-2.03896	-0.148193	0.263844	0.607596	-0.247276	-0.240479	-0.246725	-1.4463	0.247588	0.263844	0.384831	-0.246725	7.9243e-05	0.378148	-0.244827	1	-1.4463	0.76581	0.241082	124979000	0.00377508	0.838156	0.378408	6	6	6	53	53	53	20.555	0	31.533	2131600000	757030000	1374600000	1	1	1	2	0	2	1	1	2
F1LYA4	F1LYA4;Q9JKB5;A0A0G2JVS0	Arid4b	ENSRNOG00000016391;ENSRNOG00000049751	AT-rich interactive domain-containing protein 4B	0.633507	NaN	0.195741	-0.263137	-0.024082	0.505606	0.506094	NaN	0.633507	1	-0.024082	0.839391	0.50585	0.000307255	0.395048	0.50585	1	0.633507	1	-0.0304925	51426500	0.000345267	NaN	0.229506	4	3	3	4	3.2	3.2	136.86	0.00022376	5.1276	318480000	136540000	181940000	1	1	0	1	2	1	0	0	1
G3V6P8	G3V6P8	Gng12	ENSRNOG00000050231	Guanine nucleotide-binding protein subunit gamma	-0.556656	-1.80843	0.060573	-0.214921	-0.329151	-0.364033	-0.377356	-0.387437	-1.18254	0.3099	-0.214921	0.298172	-0.377356	0.000324287	0.395048	-0.376275	1	-1.18254	0.708956	-0.161166	162544000	0.0117392	0.885139	0.200345	3	3	3	51.4	51.4	51.4	7.9851	0	91.721	5165700000	2784300000	2381400000	2	3	3	2	2	2	2	2	2
Q4V7E8	Q4V7E8	Lrrfip2	ENSRNOG00000021047	Leucine-rich repeat flightless-interacting protein 2	NaN	NaN	NaN	NaN	0.0525741	NaN	0.562865	0.563451	NaN	1	0.0525741	1	0.563158	0.000331138	0.395048	0.563158	1	NaN	1	0.0525741	118723000	0.000414261	NaN	NaN	6	5	5	21.3	18.5	18.5	49.772	0	34.458	195970000	91383000	104580000	0	0	1	0	0	0	2	1	0
P16257	P16257	Tspo	ENSRNOG00000010549	Translocator protein	-0.380201	NaN	0.462437	0.468718	0.0932596	-0.456016	-0.45508	NaN	-0.380201	1	0.462437	0.110624	-0.455548	0.000654147	0.508031	-0.455548	1	-0.380201	0.631155	0.341471	124449000	0.000661979	NaN	0.214981	2	2	2	20.7	20.7	20.7	18.94	0	32.675	7578000000	3251100000	4326900000	1	1	1	1	1	1	0	0	0
A0A0G2JTM7	A0A0G2JTM7;D3ZXX7	Brd7	ENSRNOG00000014419		0.443325	0.302825	0.466316	-0.377368	0.691935	0.227432	0.229361	0.210478	0.373075	0.118488	0.466316	0.507689	0.227432	0.00072657	0.508031	0.222423	1	0.373075	0.84691	0.260294	30698200	0.01039	0.0993486	0.563636	12	12	12	31.6	31.6	31.6	73.944	0	39.255	2015000000	824200000	1190800000	3	3	3	3	3	1	2	2	2
Q5FVM4	Q5FVM4	Nono	ENSRNOG00000003689	Non-POU domain-containing octamer-binding protein	0.0546058	0.18813	-0.00865758	-0.271313	-0.369497	0.17458	0.185542	0.168211	0.121368	0.32016	-0.271313	0.182164	0.17458	0.000824904	0.508031	0.176111	1	0.121368	0.64808	-0.216489	72175100	0.00876632	0.0944161	0.186562	21	20	20	50.6	48.9	48.9	54.925	0	323.31	200170000000	94285000000	105890000000	16	17	16	16	15	16	17	18	18
P63025	P63025;P63045	Vamp3	ENSRNOG00000030055	Vesicle-associated membrane protein 2;Vesicle-associated membrane protein 3	0.85091	0.436796	0.457332	0.41044	0.594138	0.742986	0.694991	0.665998	0.643853	0.198081	0.457332	0.0125476	0.694991	0.00102303	0.508031	0.701325	1	0.643853	0.609869	0.487303	171703000	0.0388828	0.292823	0.0954461	4	4	4	48.5	48.5	48.5	11.48	0	101.88	3202600000	1181100000	2021500000	2	2	3	2	2	3	2	3	2
D3ZZZ0	D3ZZZ0;A0A0G2K160	Ahctf1	ENSRNOG00000023541	Protein ELYS	0.248597	0.796566	0.172664	-0.0309111	-0.452761	1.03251	1.05718	1.15492	0.522582	0.307418	-0.0309111	0.630193	1.05718	0.00119213	0.508031	1.08154	1	0.522582	0.931047	-0.103669	103035000	0.0647371	0.387473	0.318998	45	45	45	32.3	32.3	32.3	247.88	0	260.85	6226900000	2839500000	3387400000	9	14	10	15	15	12	8	8	9
A0A0G2K2M9	A0A0G2K2M9	Srrm2		Serine/arginine repetitive matrix protein 2	1.22698	1.59562	0.0749103	0.22541	0.0775845	1.31663	1.41946	1.48739	1.4113	0.0826773	0.0775845	0.126851	1.41946	0.00124073	0.508031	1.40783	1	1.4113	0.638884	0.125968	NaN	0.0859712	0.260671	0.0861292	43	43	43	26	26	26	295.11	0	323.31	34541000000	14081000000	20460000000	16	13	19	17	20	21	24	24	21
F1M775	F1M775	Diaph1	ENSRNOG00000019688		0.237581	-0.335347	-0.196593	0.371811	0.2326	0.253803	0.232983	0.26436	-0.0488832	0.892402	0.2326	0.510103	0.253803	0.0013526	0.508031	0.250382	1	-0.0488832	0.847861	0.135939	30665600	0.0159658	0.405121	0.296274	21	21	21	21.9	21.9	21.9	140.3	0	97.005	4178300000	2320700000	1857600000	4	5	4	5	2	4	3	2	4
E9PSN4	E9PSN4	Zc3h13	ENSRNOG00000011237		1.25514	0.0339292	-0.278381	0.366783	-0.330495	1.07809	0.968679	1.10005	0.644536	0.482795	-0.278381	0.753397	1.07809	0.0014968	0.508031	1.04894	1	0.644536	1	-0.0806976	61051500	0.0703688	0.863528	0.388405	16	16	16	10.9	10.9	10.9	203.52	0	39.79	2250000000	913630000	1336400000	4	4	3	5	4	4	2	4	2
Q6AYI1	Q6AYI1	Ddx5	ENSRNOG00000030680		0.0871783	-0.281307	-0.201324	-0.587425	-0.184096	0.209702	0.185953	0.187614	-0.0970645	0.691316	-0.201324	0.132795	0.187614	0.0015465	0.508031	0.194423	1	-0.0970645	0.640748	-0.324282	94726600	0.0132583	0.260559	0.228052	36	36	27	60.7	60.7	46.7	69.238	0	323.31	549250000000	260430000000	288820000000	25	26	25	25	26	24	23	24	24
A0A0G2K1A9	A0A0G2K1A9	Nol11		Nucleolar protein 11	0.224183	0.233543	-0.283127	-0.574555	-0.520256	0.216596	0.189786	0.213587	0.228863	0.0130173	-0.520256	0.035917	0.213587	0.00167954	0.508031	0.206656	1	0.228863	0.609869	-0.459313	NaN	0.0146877	0.00661897	0.154978	22	22	22	38.2	38.2	38.2	80.576	0	200.27	16379000000	7870600000	8508700000	10	13	7	9	11	11	10	8	10
Q642E6	Q642E6;Q9EQV6	Tpp1	ENSRNOG00000019212	Tripeptidyl-peptidase 1	-0.867716	-0.805283	0.295449	0.324622	0.198486	-0.609128	-0.693504	-0.700869	-0.836499	0.0237464	0.295449	0.0189697	-0.693504	0.00193632	0.508031	-0.667834	1	-0.836499	0.609869	0.272852	177594000	0.0509741	0.0441469	0.0660338	3	3	3	8.7	8.7	8.7	61.312	0	82.011	10743000000	5352500000	5390300000	2	2	0	3	3	2	2	2	1
D3ZHK9	D3ZHK9	Zfp36l2	ENSRNOG00000005067;ENSRNOG00000050108		0.599226	0.665313	-0.0154617	0.652312	0.403567	1.12152	1.31808	1.24489	0.632269	0.0332404	0.403567	0.217056	1.24489	0.00217377	0.508031	1.22816	1	0.632269	0.667493	0.346806	4843920	0.0993417	0.0467303	0.337486	5	5	4	15.8	15.8	13.1	50.059	0	25.963	875280000	394440000	480840000	1	1	1	1	2	1	1	0	2
Q9QZK5	Q9QZK5	Htra1	ENSRNOG00000020533	Serine protease HTRA1	-0.380063	-1.11489	-0.688191	-1.49186	-1.45449	-0.264132	-0.292368	-0.310739	-0.747476	0.290843	-1.45449	0.0436869	-0.292368	0.00219125	0.508031	-0.28908	1	-0.747476	0.609869	-1.21151	208532000	0.0234768	0.5196	0.453595	20	20	20	57.9	57.9	57.9	51.33	0	323.31	68120000000	40873000000	27246000000	8	11	6	6	5	9	10	11	11
D3ZAQ6	D3ZAQ6	Nol7	ENSRNOG00000017904		0.830365	1.08107	-0.0424467	-0.433839	-0.686652	0.679108	0.712121	0.799128	0.955715	0.0830241	-0.433839	0.174479	0.712121	0.00239513	0.508031	0.730119	1	0.955715	0.645792	-0.387646	25966500	0.0620012	0.177272	0.324577	7	7	7	18.5	18.5	18.5	33.624	0	61.438	8701000000	5474900000	3226100000	2	3	2	2	4	3	2	2	4
Q5PPL3	Q5PPL3	Nsdhl	ENSRNOG00000017099	Sterol-4-alpha-carboxylate 3-dehydrogenase, decarboxylating	-0.139979	-0.942743	0.335296	0.174903	-0.400647	-0.137847	-0.1333	-0.116328	-0.541361	0.40616	0.174903	0.885195	-0.1333	0.00256039	0.508031	-0.129158	1	-0.541361	1	0.0365175	148662000	0.0113415	0.56764	0.386996	16	16	16	59.7	59.7	59.7	40.411	0	238.28	33615000000	15134000000	18481000000	11	9	10	8	9	10	4	8	8
Q66HG9	Q66HG9	Mavs	ENSRNOG00000025295	Mitochondrial antiviral-signaling protein	1.97022	0.884919	0.0665207	0.672502	0.208478	1.48205	1.46508	1.26011	1.42757	0.231254	0.208478	0.226483	1.46508	0.0025762	0.508031	1.40242	1	1.42757	0.667493	0.315833	130274000	0.123529	0.767422	0.316934	10	10	10	39.6	39.6	39.6	53.804	0	51.859	2936700000	1154000000	1782700000	2	4	5	3	3	4	3	2	1
G3V7L1	G3V7L1;A0A0G2JW60	Utrn	ENSRNOG00000011058		0.0561461	0.259664	0.206784	-0.00222261	-0.433865	0.233703	0.226904	0.196103	0.157905	0.364433	-0.00222261	0.724551	0.226904	0.00278084	0.508031	0.218903	1	0.157905	0.996989	-0.0764344	8098750	0.0200359	0.143909	0.326708	27	27	25	11.9	11.9	11.3	391.31	0	81.364	2813100000	1302800000	1510300000	6	11	5	5	6	6	1	0	2
Q1RP77	Q1RP77	Nop16	ENSRNOG00000017284	Nucleolar protein 16	0.213251	1.74549	-0.153479	-0.408068	-0.473405	0.530226	0.542283	0.625394	0.979372	0.422606	-0.408068	0.0715446	0.542283	0.00278237	0.508031	0.565967	1	0.979372	0.609869	-0.344984	12685800	0.0518164	1.08346	0.169035	7	7	7	47.2	47.2	47.2	21.117	0	71	10384000000	5225900000	5157700000	2	3	3	5	2	2	2	2	4
Q6P9V9	Q6P9V9	Tuba1b		Tubulin alpha-1B chain	-0.724967	-2.98349	0.00832903	0.591575	0.546417	-0.401258	-0.431334	-0.358597	-1.85423	0.348247	0.546417	0.178218	-0.401258	0.00281247	0.508031	-0.397063	1	-1.85423	0.647721	0.382107	NaN	0.0365495	1.59702	0.324488	24	24	0	77.2	77.2	0	50.151	0	323.31	608410000000	294610000000	313800000000	16	16	16	16	15	17	16	17	16
Q6AYB4	Q6AYB4	Hspa14	ENSRNOG00000015212	Heat shock 70 kDa protein 14	0.0321623	-2.06962	-0.0241595	0.665378	0.507089	-0.248937	-0.299054	-0.283967	-1.01873	0.509892	0.507089	0.207847	-0.283967	0.00285306	0.508031	-0.277319	1	-1.01873	0.66412	0.382769	80379400	0.0257115	1.48619	0.361188	14	14	14	46.2	46.2	46.2	54.462	0	173.58	4643300000	2137400000	2505800000	5	4	5	6	5	6	3	4	6
Q9QYW0	Q9QYW0	Aatf	ENSRNOG00000002778	Protein AATF	0.439719	0.338169	-0.268897	-0.589862	-0.406903	0.448768	0.539868	0.482835	0.388944	0.0826407	-0.406903	0.0452764	0.482835	0.00292277	0.508031	0.49049	1	0.388944	0.609869	-0.421887	71654800	0.0460301	0.0718067	0.161006	20	20	20	51.2	51.2	51.2	59.496	0	287.42	13449000000	6525600000	6923000000	11	11	9	10	11	10	9	10	10
Q02769	Q02769	Fdft1	ENSRNOG00000021314	Squalene synthase	0.126118	0.877522	1.9718	1.25132	-0.398636	-0.329361	-0.327165	-0.386069	0.50182	0.409127	1.25132	0.311677	-0.329361	0.00306332	0.508031	-0.347532	1	0.50182	0.719194	0.941495	50104000	0.0333926	0.531323	1.21521	14	14	14	50.2	50.2	50.2	48.106	0	103.87	3662900000	1407500000	2255400000	4	7	5	4	4	3	3	2	2
O08679	O08679;A0A0G2K6X6;D4A6T9	Mark2	ENSRNOG00000017069;ENSRNOG00000021184	Serine/threonine-protein kinase MARK2	-0.146273	-0.565919	0.260362	NaN	0.390958	0.324767	0.304382	0.267937	-0.356096	0.338977	0.32566	0.125978	0.304382	0.00307573	0.508031	0.299029	1	-0.356096	0.638884	0.32566	155559000	0.0287907	0.296735	0.0923453	11	11	8	20.6	20.6	15.8	80.871	0	135.7	2176800000	1098300000	1078500000	5	1	2	4	5	3	1	2	5
Q9JHX4	Q9JHX4	Casp8	ENSRNOG00000012331	Caspase-8;Caspase-8 subunit p10;Caspase-8 subunit p18	-0.712414	-1.90427	-0.106791	0.0189586	0.252641	-0.643004	-0.53386	-0.565546	-1.30834	0.272094	0.0189586	0.653916	-0.565546	0.00310084	0.508031	-0.580803	1	-1.30834	0.948764	0.054936	65420800	0.0561489	0.842769	0.182397	23	23	23	58.5	58.5	58.5	55.338	0	127.61	6624800000	3359100000	3265700000	2	2	5	4	2	4	6	5	6
F1LSM7	F1LSM7;Q63627	Scaf4	ENSRNOG00000002104	Splicing factor, arginine/serine-rich 15	0.24925	0.368182	-0.105009	-0.150616	0.0643561	0.341284	0.360421	0.29673	0.308716	0.121144	-0.105009	0.432417	0.341284	0.00319864	0.508031	0.332812	1	0.308716	0.792128	-0.0637563	33991200	0.0326803	0.0840978	0.113268	11	11	3	14.5	14.5	5.2	130.95	0	99.932	3887300000	1673800000	2213500000	6	6	3	3	6	6	4	3	4
F7FF45	F7FF45	Numa1	ENSRNOG00000000417		0.521296	0.171999	0.155024	-0.446503	-0.342348	0.482859	0.477766	0.402039	0.346648	0.297111	-0.342348	0.37297	0.477766	0.00329366	0.508031	0.454221	1	0.346648	0.756966	-0.211276	173250000	0.0452629	0.246991	0.321471	86	86	4	53.9	53.9	1.7	234.94	0	323.31	200490000000	91516000000	108980000000	58	61	60	61	63	56	51	52	51
B4F7F1	B4F7F1;A0A0G2K6F9;A0A0G2JWP1	Cstf2			0.863013	0.977675	-0.0431551	-0.218511	-0.188549	0.953764	0.78526	0.820929	0.920344	0.0396056	-0.188549	0.10928	0.820929	0.00359025	0.508031	0.853318	1	0.920344	0.631155	-0.150072	NaN	0.0887985	0.0810779	0.0937968	18	18	11	48.9	48.9	32.3	60.838	0	258.13	8405700000	3520400000	4885300000	8	12	10	11	10	5	8	10	6
P62836	P62836	Rap1a	ENSRNOG00000032463	Ras-related protein Rap-1A	-0.448356	-0.967443	0.103233	-0.234165	-1.35461	-0.416188	-0.415717	-0.497176	-0.7079	0.223721	-0.234165	0.37785	-0.416188	0.00371404	0.508031	-0.443027	1	-0.7079	0.760802	-0.495181	227615000	0.046895	0.36705	0.763167	10	4	4	57.1	29.3	29.3	20.987	0	47.28	3910700000	1957600000	1953100000	7	7	7	7	6	5	6	6	5
Q6AXX4	Q6AXX4	Utp3	ENSRNOG00000003599	Something about silencing protein 10	0.590329	0.792405	-0.316661	-0.654046	-0.544339	0.631799	0.611827	0.746736	0.691367	0.0923831	-0.544339	0.0365971	0.631799	0.00399077	0.508031	0.663454	1	0.691367	0.609869	-0.505015	21063900	0.072812	0.142889	0.172096	15	15	15	34.3	34.3	34.3	53.923	0	280.09	11258000000	5423200000	5834900000	8	8	5	9	8	6	5	5	6
A0A0G2K6T6	A0A0G2K6T6	Setd1			0.943981	NaN	0.275534	0.0691396	0.0237918	0.763407	0.699545	0.610983	0.943981	1	0.0691396	0.253752	0.699545	0.00406169	0.508031	0.691312	1	0.943981	0.673925	0.122822	NaN	0.0765446	NaN	0.134182	10	10	10	11.2	11.2	11.2	186.49	0	68.067	629110000	279920000	349190000	3	3	3	1	2	2	3	0	0
B1WCA0	B1WCA0	Ppm1d	ENSRNOG00000003329		0.749749	NaN	NaN	NaN	NaN	1.16486	0.933573	1.028	0.749749	1	NaN	1	1.028	0.00412491	0.508031	1.04215	1	0.749749	1	NaN	72813800	0.11629	NaN	NaN	2	2	2	4.3	4.3	4.3	65.682	0.0032135	2.96	20037000	6128600	13909000	1	1	0	1	0	1	0	1	0
Q62780	Q62780	Ddx46	ENSRNOG00000021637	Probable ATP-dependent RNA helicase DDX46	0.108753	-0.30516	-0.315892	0.103839	0.44788	0.148259	0.181998	0.150773	-0.0982034	0.717945	0.103839	0.755918	0.150773	0.00454904	0.508031	0.160343	1	-0.0982034	1	0.0786089	11583000	0.0187956	0.292681	0.382511	35	35	35	37.1	37.1	37.1	117.38	0	213.13	21657000000	10274000000	11383000000	13	14	14	14	10	10	11	12	11
A0A0G2K1E5	A0A0G2K1E5;F1LSH0	Sympk	ENSRNOG00000014353		0.289623	0.0391909	0.0257804	-0.31215	-0.291913	0.366781	0.444593	0.459742	0.164407	0.414375	-0.291913	0.220206	0.444593	0.00458715	0.508031	0.423705	1	0.164407	0.667493	-0.192761	81191000	0.0498763	0.177083	0.189533	29	29	29	37.2	37.2	37.2	141.91	0	123.04	7928000000	3667000000	4261000000	10	11	7	8	7	8	7	9	13
Q4KLI0	Q4KLI0	Smarcb1	ENSRNOG00000028302		0.281297	0.258408	-0.123127	-0.646038	-0.468788	0.172527	0.142308	0.179813	0.269853	0.0269823	-0.468788	0.115039	0.172527	0.00481402	0.508031	0.164883	1	0.269853	0.638884	-0.412651	15836300	0.0198867	0.0161845	0.265937	11	11	11	50.5	50.5	50.5	43.158	0	136.49	7700100000	3733900000	3966200000	5	7	5	5	5	5	7	7	6
Q5I0E8	Q5I0E8	Kif22		Kinesin-like protein KIF22	0.337375	0.452702	0.199965	-0.317546	-0.539518	0.384339	0.429251	0.489873	0.395038	0.0922749	-0.317546	0.422732	0.429251	0.00491626	0.508031	0.434488	1	0.395038	0.787383	-0.219033	NaN	0.0529617	0.0815482	0.379457	19	19	19	42.8	42.8	42.8	73.055	0	141.75	4613700000	2215800000	2397900000	11	8	5	6	9	10	9	12	13
D3ZPD0	D3ZPD0	Ckap2	ENSRNOG00000024650		0.263701	0.132564	-0.35171	-0.509337	-0.351564	0.482642	0.489634	0.596865	0.198133	0.203455	-0.35171	0.0164958	0.489634	0.0049573	0.508031	0.523047	1	0.198133	0.609869	-0.404204	74383700	0.064024	0.0927274	0.0910486	8	8	8	15.7	15.7	15.7	75.43	0	23.635	1460700000	703770000	756950000	1	3	1	4	4	1	4	4	5
F1LSH3	F1LSH3;Q4R180;A0A0G2K0G7	Orc3	ENSRNOG00000008314	Origin recognition complex subunit 3	-0.00700238	0.188836	0.0350591	-0.593131	-0.455864	0.323916	0.402381	0.331702	0.090917	0.523596	-0.455864	0.218321	0.331702	0.00497132	0.508031	0.352666	1	0.090917	0.667493	-0.337979	54590000	0.04323	0.138479	0.33027	14	14	14	28.7	28.7	28.7	81.866	0	43.127	1729000000	830200000	898810000	4	6	4	3	3	4	3	3	5
Q8R4A1	Q8R4A1;Q8R4A1-2;A0A0G2KAP1	Ero1l		ERO1-like protein alpha	-0.405601	-0.611382	0.304477	0.291524	-0.127922	-0.153854	-0.124996	-0.158824	-0.508491	0.1271	0.291524	0.386529	-0.153854	0.00518447	0.508031	-0.145892	1	-0.508491	0.767271	0.156026	NaN	0.0182657	0.145509	0.245992	18	18	18	58	58	58	54.018	0	236.25	16487000000	7543800000	8943200000	9	9	9	9	5	8	9	8	8
G3V7C6	G3V7C6;Q6P9T8	Tubb4b	ENSRNOG00000010170	Tubulin beta-4B chain	-0.734446	-3.38079	0.0326646	0.521653	0.524576	-0.415965	-0.441891	-0.344265	-2.05762	0.363816	0.521653	0.158834	-0.415965	0.005267	0.508031	-0.400707	1	-2.05762	0.64184	0.359631	2422870	0.0505697	1.87124	0.283165	28	28	1	77	77	2.2	61.186	0	323.31	672010000000	333060000000	338950000000	20	21	23	23	23	22	21	22	20
D3ZXY1	D3ZXY1;A0A0G2K0Q6	Incenp	ENSRNOG00000032929		0.114391	1.47578	0.747726	0.5248	-0.40865	1.61954	1.40913	1.82006	0.795086	0.450753	0.5248	0.501615	1.61954	0.0053448	0.508031	1.61624	1	0.795086	0.841692	0.287959	232875000	0.205485	0.962649	0.613491	21	21	21	34	34	34	102.61	0	146.95	4928100000	1881600000	3046600000	9	6	7	7	8	7	9	7	8
Q5XIF6	Q5XIF6	Tuba4a	ENSRNOG00000003597	Tubulin alpha-4A chain	-0.808153	-2.5577	-0.044333	0.585765	0.545305	-0.465939	-0.523268	-0.60092	-1.68293	0.305168	0.545305	0.217208	-0.523268	0.00540108	0.508031	-0.530042	1	-1.68293	0.667493	0.362246	82184900	0.0677448	1.23712	0.352688	23	6	6	73	27.7	27.7	49.924	0	165.13	12750000000	6332000000	6418100000	16	15	15	15	15	15	15	15	15
A0A0G2JV08	A0A0G2JV08;A0A0G2K2I0	Suz12			0.0510452	-0.00596207	0.186741	-0.814425	-0.623358	0.360645	0.336828	0.277636	0.0225416	0.574022	-0.623358	0.307134	0.336828	0.00571474	0.508031	0.325036	1	0.0225416	0.717587	-0.417014	NaN	0.0427423	0.0403102	0.531523	10	10	10	23.2	23.2	23.2	80.151	0	13.294	994790000	366960000	627830000	3	3	3	3	4	3	4	3	1
F1LT49	F1LT49	Lrrc47	ENSRNOG00000024796		-0.232478	-1.9613	-0.171468	0.484736	0.793593	-0.243377	-0.209643	-0.273963	-1.09689	0.42489	0.484736	0.32419	-0.243377	0.0058244	0.508031	-0.242328	1	-1.09689	0.721837	0.368953	174789000	0.0321731	1.22246	0.492838	16	16	16	39.8	39.8	39.8	63.53	0	49.687	3604100000	1231000000	2373100000	4	2	6	6	5	5	3	5	1
F1LR10	F1LR10	Lima1	ENSRNOG00000019393		0.578983	-0.304507	0.307152	0.224947	-0.117734	0.501529	0.398129	0.403775	0.137238	0.808238	0.224947	0.399669	0.403775	0.0059153	0.508031	0.434478	1	0.137238	0.770898	0.138122	115933000	0.0581366	0.624722	0.225357	32	32	32	54.2	54.2	54.2	83.796	0	323.31	53979000000	23291000000	30688000000	16	18	17	21	18	20	18	14	16
D3ZTY0	D3ZTY0	Cnih4	ENSRNOG00000003717		-0.744106	-2.79304	-0.0156659	0.122098	0.026387	-0.735151	-0.572826	-0.724993	-1.76857	0.334245	0.026387	0.390897	-0.724993	0.00594795	0.508031	-0.677656	1	-1.76857	0.769315	0.044273	104469000	0.0909281	1.44881	0.0706021	1	1	1	14.4	14.4	14.4	16.091	0	81.669	2721900000	1470500000	1251300000	1	1	1	1	1	1	1	0	1
F6T071	F6T071;Q68G33;Q9R064	Gorasp2	ENSRNOG00000023386	Golgi reassembly-stacking protein 2	0.152344	-0.414565	-0.265339	NaN	-0.0401911	0.208993	0.17769	0.233138	-0.13111	0.724193	-0.152765	0.404298	0.208993	0.00598129	0.508031	0.206607	1	-0.13111	0.774202	-0.152765	63767500	0.0278008	0.400865	0.159204	6	6	6	31.3	31.3	31.3	39.932	0	98.31	3537400000	1721500000	1815900000	2	3	2	3	3	3	3	3	4
Q5U2Y1-2	Q5U2Y1-2;Q5U2Y1;A0A0G2K4T7;A0A1B0GWN0;A0A1B0GWM4	Gtf2i	ENSRNOG00000001479	General transcription factor II-I	0.720122	0.389775	0.231906	-0.192068	0.00226923	0.431586	0.499622	0.5661	0.554949	0.184166	0.00226923	0.919267	0.499622	0.00599891	0.508031	0.499103	1	0.554949	1	0.0140357	27420700	0.0672586	0.233591	0.212232	38	38	38	53.3	53.3	53.3	103.02	0	323.31	26967000000	12140000000	14827000000	18	16	17	14	19	14	20	16	19
P22734-2	P22734-2;P22734	Comt	ENSRNOG00000001889	Catechol O-methyltransferase	-0.263329	-0.954732	0.0534158	-0.0430568	0.143195	-0.194804	-0.242315	-0.191493	-0.609031	0.328671	0.0534158	0.441662	-0.194804	0.0060823	0.508031	-0.209537	1	-0.609031	0.80015	0.0511846	89824600	0.0284344	0.488896	0.0931458	14	14	14	83.7	83.7	83.7	24.747	0	323.31	29409000000	14494000000	14915000000	9	11	10	9	6	9	7	7	7
D3ZLA3	D3ZLA3	Cpne3	ENSRNOG00000006298		-0.243729	-1.96247	0.330845	0.168932	0.647445	-0.447407	-0.472943	-0.578523	-1.1031	0.421338	0.330845	0.112663	-0.472943	0.00639024	0.508031	-0.499624	1	-1.1031	0.63627	0.382407	38183600	0.0695107	1.21534	0.243388	13	12	11	36.4	34.7	33	59.685	0	323.31	8952800000	4404400000	4548400000	6	6	7	6	6	5	3	3	5
G3V644	G3V644	Ndufv3	ENSRNOG00000001182		0.275092	-0.368714	-0.362041	0.199983	0.186015	0.18218	0.191888	0.235298	-0.0468107	0.908068	0.186015	0.969501	0.191888	0.0064017	0.508031	0.203122	1	-0.0468107	1	0.00798558	12455100	0.0282851	0.45524	0.320528	9	9	9	34.5	34.5	34.5	49.299	0	315.8	9060400000	4106800000	4953700000	5	7	6	7	6	8	4	4	5
A0A0G2K8K0	A0A0G2K8K0	Sfpq			0.066972	0.0628145	0.00817616	-0.369999	-0.388496	0.157845	0.178654	0.134711	0.0648933	0.0203859	-0.369999	0.192639	0.157845	0.0064653	0.508031	0.15707	1	0.0648933	0.650736	-0.250106	NaN	0.0219818	0.00293977	0.22387	25	25	24	42.7	42.7	41.5	75.085	0	323.31	271470000000	127460000000	144000000000	15	16	19	18	17	19	18	18	17
D4AAK2	D4AAK2;A0A0G2JXS3	Nusap1	ENSRNOG00000004921		1.11743	NaN	-0.00611059	-0.888301	-0.361186	0.786086	0.630033	0.82985	1.11743	1	-0.361186	0.244043	0.786086	0.00649736	0.508031	0.748656	1	1.11743	0.669577	-0.418533	117971000	0.105035	NaN	0.443882	4	4	4	14.6	14.6	14.6	42.931	0	101.04	1389400000	630230000	759130000	1	1	1	0	1	0	1	0	0
Q66HK4	Q66HK4;Q63187	Tceb3	ENSRNOG00000010902	Transcription elongation factor B polypeptide 3	0.717474	NaN	-0.139066	-0.489241	NaN	1.19295	1.21848	NaN	0.717474	1	-0.314153	0.323692	1.20572	0.00674008	0.508031	1.20572	1	0.717474	0.721803	-0.314153	158112000	0.0180535	NaN	0.247611	5	5	5	8.9	8.9	8.9	87.231	0	9.8302	273780000	106030000	167760000	1	0	1	1	1	1	0	1	0
D4A8T3	D4A8T3	Copz1	ENSRNOG00000036835		-0.0180481	0.77543	-0.129861	0.768988	0.407392	0.360423	0.352734	NaN	0.378691	0.514815	0.407392	0.313301	0.356579	0.00686345	0.508031	0.356579	1	0.378691	0.719773	0.348839	142681000	0.00543688	0.561074	0.452276	5	5	5	32.8	32.8	32.8	20.198	0	59.601	3187900000	1531200000	1656600000	3	2	3	1	1	2	0	0	0
Q6VEU8	Q6VEU8	Ddx24	ENSRNOG00000009166		0.257342	0.382871	-0.303582	-0.6705	-0.63006	0.379279	0.431886	0.506201	0.320106	0.12326	-0.63006	0.0440901	0.431886	0.00695641	0.508031	0.439122	1	0.320106	0.609869	-0.534714	136523000	0.0637696	0.088762	0.201185	29	29	29	49.4	49.4	49.4	95.292	0	323.31	11002000000	5359500000	5642300000	11	11	10	12	12	12	10	10	13
Q6AYB3	Q6AYB3	Isy1	ENSRNOG00000010021	Pre-mRNA-splicing factor ISY1 homolog	0.183174	0.512544	0.133684	0.115877	0.0429073	0.660361	0.493989	0.615337	0.347859	0.281489	0.115877	0.0724394	0.615337	0.00701908	0.508031	0.589896	1	0.347859	0.609869	0.0974897	184973000	0.0860541	0.232899	0.0481009	6	6	6	24.6	24.6	24.6	32.861	0	116.5	6560200000	2846700000	3713500000	3	3	3	3	3	5	4	4	4
A0A0G2K8B3	A0A0G2K8B3;G3V629	Ppp1r18	ENSRNOG00000000816		0.710786	NaN	NaN	0.671237	0.385942	0.591547	0.604889	NaN	0.710786	1	0.528589	0.167804	0.598218	0.00709911	0.508031	0.598218	1	0.710786	0.64184	0.528589	5469940	0.00943445	NaN	0.201734	3	3	3	9.2	9.2	9.2	57.362	0	20.489	249510000	97095000	152410000	2	1	2	2	1	1	0	0	0
A0A096MIV5	A0A096MIV5;A2VD14;F1M8H5;A0A096MJ15	Abcf2	ENSRNOG00000010609		-0.283538	-2.25632	-0.0836396	0.55586	0.34035	-0.168592	-0.178195	-0.220762	-1.26993	0.420417	0.34035	0.286076	-0.178195	0.00710419	0.508031	-0.189183	1	-1.26993	0.697885	0.270857	7135430	0.0277667	1.39497	0.325364	17	17	17	32.5	32.5	32.5	71.655	0	59.047	5588700000	2744300000	2844400000	8	4	5	9	10	9	5	7	3
P19944	P19944;A0A0H2UHJ3;A0A0G2K4Q1	Rplp1	ENSRNOG00000011955;ENSRNOG00000013874	60S acidic ribosomal protein P1	-0.633553	-1.21705	-0.0574531	0.264689	0.179925	-0.292851	-0.26134	-0.216996	-0.925303	0.194446	0.179925	0.312578	-0.26134	0.00724584	0.508031	-0.257063	1	-0.925303	0.719773	0.129054	38993400	0.0381078	0.412596	0.166987	6	6	6	94.7	94.7	94.7	11.498	0	323.31	25669000000	12484000000	13184000000	3	3	4	3	3	3	4	4	4
Q62733	Q62733	Tmpo		Lamina-associated polypeptide 2, isoform beta	0.6773	0.574139	-0.0687569	-0.276647	-0.414288	0.971581	0.723507	0.817229	0.62572	0.0523608	-0.276647	0.12782	0.817229	0.00737579	0.508031	0.837439	1	0.62572	0.638884	-0.253231	NaN	0.125265	0.072946	0.173952	20	20	20	55.3	55.3	55.3	50.277	0	323.31	180830000000	78520000000	102310000000	15	14	15	14	15	15	13	14	14
D3ZU96	D3ZU96	Usp42	ENSRNOG00000001059	Ubiquitin carboxyl-terminal hydrolase 42	1.20908	1.53167	NaN	NaN	-0.537822	1.08115	NaN	1.10682	1.37037	0.0745878	-0.537822	1	1.09398	0.00746904	0.508031	1.09398	1	1.37037	1	-0.537822	14904000	0.0181522	0.228105	NaN	7	7	7	8.5	8.5	8.5	146.36	0	11.324	168320000	84979000	83339000	2	3	0	0	0	2	0	1	2
Q5M7V8	Q5M7V8	Thrap3	ENSRNOG00000009977	Thyroid hormone receptor-associated protein 3	0.886163	0.53446	0.0687785	-0.168319	-0.287706	0.956279	0.855986	0.704592	0.710311	0.154501	-0.168319	0.343093	0.855986	0.00751751	0.508031	0.838952	1	0.710311	0.733175	-0.129082	147948000	0.126705	0.248691	0.181452	30	30	29	30	30	30	108.25	0	323.31	64399000000	30524000000	33874000000	13	15	14	14	14	14	12	13	12
P18886	P18886;G3V7N5	Cpt2	ENSRNOG00000012443	Carnitine O-palmitoyltransferase 2, mitochondrial	0.0908836	-0.623949	-0.0455583	0.106493	0.220901	-0.102317	-0.129616	-0.0987465	-0.266533	0.592082	0.106493	0.347631	-0.102317	0.00773256	0.508031	-0.110226	1	-0.266533	0.739154	0.0939454	131354000	0.0168864	0.505463	0.133672	16	16	16	34.8	34.8	34.8	74.109	0	107.26	7389300000	3318600000	4070700000	4	5	2	3	3	7	4	5	2
A1L134	A1L134	Aup1	ENSRNOG00000007842	Ancient ubiquitous protein 1	0.409467	-0.632736	-0.270526	0.076317	-0.178092	0.492194	0.403063	0.549769	-0.111634	0.865649	-0.178092	0.354033	0.492194	0.00775842	0.508031	0.481676	1	-0.111634	0.742885	-0.1241	178572000	0.0739164	0.736949	0.179615	7	7	7	33.2	33.2	33.2	46.199	0	96.479	2937600000	1442000000	1495600000	3	4	2	2	4	2	4	2	3
G3V6Z3	G3V6Z3;Q8VH46;A0A0G2JVI5	Afap1	ENSRNOG00000007599	Actin filament-associated protein 1	0.684879	0.194339	0.314691	0.278888	-0.328865	0.854501	0.621163	0.766298	0.439609	0.323982	0.278888	0.713699	0.766298	0.00818379	0.508031	0.747321	1	0.439609	0.988837	0.0882378	79558800	0.117821	0.346864	0.361665	3	3	3	4.7	4.7	4.7	80.746	0.00063911	3.9844	135210000	50867000	84341000	2	1	1	1	1	1	2	0	2
A0A0G2JYL4	A0A0G2JYL4;D3ZGT6	P4ha2	ENSRNOG00000033663		0.143342	NaN	-0.625536	-0.200299	-0.218005	0.114367	0.15709	0.134878	0.143342	1	-0.218005	0.129172	0.134878	0.00819384	0.508031	0.135445	1	0.143342	0.639429	-0.347947	39214800	0.0213673	NaN	0.240562	6	6	6	15.6	15.6	15.6	60.635	0	20.441	352820000	169720000	183100000	2	0	1	2	1	1	0	1	0
A0A0G2K9G6	A0A0G2K9G6;D4A3Q2	Stag1	ENSRNOG00000015389		0.598395	0.131359	-0.00823141	-0.427045	-0.351699	0.465077	0.376816	0.343094	0.364877	0.362432	-0.351699	0.178799	0.376816	0.0083708	0.508031	0.394996	1	0.364877	0.64808	-0.262325	108374000	0.0629907	0.330244	0.223253	24	19	19	22.9	19.9	19.9	144.43	0	88.56	2558800000	1266200000	1292600000	9	11	8	6	11	9	6	7	4
G3V897	G3V897	Ctr9	ENSRNOG00000017195		0.416212	0.00424574	0.0100864	-0.391364	0.0148395	0.231353	0.216252	0.168298	0.210229	0.493506	0.0100864	0.459988	0.216252	0.00846371	0.508031	0.205301	1	0.210229	0.811484	-0.122146	182824000	0.0329232	0.291304	0.233162	23	23	23	27.1	27.1	27.1	133.34	0	99.819	7914600000	3626700000	4287900000	9	12	8	9	8	5	5	5	4
B5DF48	B5DF48	Tyw1	ENSRNOG00000024352		0.0209198	-0.58741	0.42443	0.316606	-0.299502	0.112669	0.109047	0.144684	-0.283245	0.522663	0.316606	0.58096	0.112669	0.00848711	0.508031	0.122134	1	-0.283245	0.900489	0.147178	31761900	0.0196134	0.430154	0.390575	14	14	14	26.9	26.9	26.9	82.086	0	37.329	1761400000	939340000	822050000	4	4	5	3	4	3	2	2	4
P69897	P69897;P69897-2	Tubb5	ENSRNOG00000000821	Tubulin beta-5 chain	-0.692599	-2.77946	-0.166734	0.239228	0.492463	-0.34596	-0.374101	-0.270546	-1.73603	0.34453	0.239228	0.430078	-0.34596	0.00865165	0.508031	-0.330203	1	-1.73603	0.790078	0.188319	5519550	0.0535455	1.47563	0.332534	27	5	4	77.9	19.4	16	49.67	0	323.31	92012000000	45817000000	46194000000	19	21	22	22	21	22	19	21	20
F1M0V0	F1M0V0	Zfp280d	ENSRNOG00000005842		0.0883226	1.26358	-0.0536768	-0.539675	-0.31706	0.512097	0.711471	0.607863	0.675949	0.455573	-0.31706	0.163305	0.607863	0.00877597	0.508031	0.610477	1	0.675949	0.64184	-0.303471	74134800	0.0997127	0.831029	0.243284	7	7	7	10.3	10.3	10.3	107.28	0	21.464	402500000	173260000	229240000	3	2	2	2	1	3	2	0	1
A0A0G2K0Z9	A0A0G2K0Z9;D4A5G2	Nop14	ENSRNOG00000012147		0.382174	0.447761	-0.525908	-0.763787	-0.64119	0.51216	0.368346	0.427909	0.414968	0.0502058	-0.64119	0.0111958	0.427909	0.00902629	0.508031	0.436138	1	0.414968	0.609869	-0.643628	82027600	0.0722595	0.0463772	0.118958	25	25	25	33.8	33.8	33.8	98.515	0	202.57	16580000000	8218900000	8361100000	13	13	10	8	10	14	11	12	13
A0A0G2JXH3	A0A0G2JXH3;Q6X936	Kirrel	ENSRNOG00000016408	Kin of IRRE-like protein 1	0.465427	-0.713396	1.49293	0.0548184	-0.133242	0.170807	0.230713	0.180519	-0.123985	0.868009	0.0548184	0.455508	0.180519	0.00903053	0.508031	0.194013	1	-0.123985	0.808198	0.471502	205830000	0.0321518	0.833554	0.889566	8	8	8	16	16	16	84.202	0	45.56	683720000	303310000	380410000	3	2	2	1	2	3	3	2	2
F1M110	F1M110	Nmt2	ENSRNOG00000026248	Glycylpeptide N-tetradecanoyltransferase	-0.770363	NaN	0.289598	0.0174944	0.508571	-0.287871	-0.333862	-0.238529	-0.770363	1	0.289598	0.195698	-0.287871	0.00908886	0.508031	-0.286754	1	-0.770363	0.652429	0.271888	80562800	0.0476761	NaN	0.246017	12	9	9	33.6	25.3	25.3	60.471	0	34.763	1359900000	597650000	762220000	1	3	2	4	3	3	3	2	2
Q9JMB5	Q9JMB5	Adrm1	ENSRNOG00000006991	Proteasomal ubiquitin receptor ADRM1	0.118357	-0.857707	-0.431941	-0.0550556	0.817429	0.176583	0.247106	0.212593	-0.369675	0.587297	-0.0550556	0.794018	0.212593	0.00908961	0.508031	0.212094	1	-0.369675	1	0.110144	181566000	0.0352645	0.690182	0.640858	8	8	8	22.4	22.4	22.4	42.102	0	114.95	2663700000	1256000000	1407700000	3	3	3	3	3	2	4	1	4
G3V6T7	G3V6T7;P38659	Pdia4	ENSRNOG00000006228	Protein disulfide-isomerase A4	-0.0731507	-0.659212	0.355589	0.393127	-0.00562307	-0.121813	-0.169865	-0.157634	-0.366182	0.429644	0.355589	0.190698	-0.157634	0.00914028	0.508031	-0.149771	1	-0.366182	0.650369	0.247698	142141000	0.0249724	0.414408	0.220184	37	37	37	56.6	56.6	56.6	72.747	0	323.31	142730000000	71149000000	71579000000	20	20	21	19	18	18	22	23	21
A0A0G2JXZ3	A0A0G2JXZ3;P70486;D3ZZM6	Atrx	ENSRNOG00000046897	Transcriptional regulator ATRX	0.190839	0.386488	0.281127	-0.0663997	-0.197879	0.347726	0.404931	0.487718	0.288664	0.20801	-0.0663997	0.972218	0.404931	0.00952198	0.508031	0.413458	1	0.288664	1	0.00561613	77499500	0.0703841	0.138345	0.24749	31	31	31	18.7	18.7	18.7	279.36	0	154.11	5763300000	2395300000	3367900000	13	9	16	12	13	9	11	13	10
Q4QQV0	Q4QQV0;M0R8B6	Tubb6	ENSRNOG00000018371;ENSRNOG00000046151		-0.858967	-2.4993	-0.0996706	0.487883	0.373274	-0.490403	-0.578435	-0.410311	-1.67913	0.289256	0.373274	0.293554	-0.490403	0.00955781	0.508031	-0.493049	1	-1.67913	0.702868	0.253829	120456000	0.0840932	1.15989	0.311457	26	15	11	80.8	56.8	47	50.059	0	323.31	34260000000	16734000000	17526000000	18	20	19	21	17	18	17	18	15
D3ZD83	D3ZD83	Mfsd10	ENSRNOG00000012534		-0.26004	-0.189897	0.216647	-0.374063	-0.331598	-0.294838	-0.209758	-0.243888	-0.224968	0.0984533	-0.331598	0.481777	-0.243888	0.00967471	0.508031	-0.249495	1	-0.224968	0.828834	-0.163005	82050500	0.0428164	0.0495985	0.329473	8	8	8	25.9	25.9	25.9	49.405	0	83.277	18197000000	9240800000	8956600000	5	5	5	6	6	6	5	4	4
D4ADG2	D4ADG2	Iba57	ENSRNOG00000022725		1.88494	NaN	NaN	NaN	NaN	1.53615	1.58371	NaN	1.88494	1	NaN	1	1.55993	0.00970389	0.508031	1.55993	1	1.88494	1	NaN	45262200	0.0336295	NaN	NaN	1	1	1	3.6	3.6	3.6	38.673	0.0046994	2.6072	81412000	19195000	62217000	1	0	0	1	1	1	0	0	0
O88387	O88387;A0A0G2K8X0;A0A0G2K2S8	Fgd4		FYVE, RhoGEF and PH domain-containing protein 4	-0.154709	NaN	NaN	NaN	NaN	0.498492	0.483104	NaN	-0.154709	1	NaN	1	0.490798	0.00997957	0.508031	0.490798	1	-0.154709	1	NaN	NaN	0.0108814	NaN	NaN	3	3	3	6.7	6.7	6.7	86.453	0.00044484	4.9476	50163000	21227000	28936000	2	2	1	1	1	1	0	0	0
Q5RJT2	Q5RJT2	Ftsj3	ENSRNOG00000009857	pre-rRNA 2'-O-ribose RNA methyltransferase FTSJ3	0.455648	0.450349	-0.320052	-0.750641	-0.509788	0.350949	0.500078	0.436779	0.452998	0.00372397	-0.509788	0.0516362	0.436779	0.0099824	0.508031	0.429269	1	0.452998	0.609869	-0.526827	94190400	0.0748476	0.00374751	0.2158	25	25	25	43.2	43.2	43.2	94.766	0	323.31	38699000000	18301000000	20397000000	16	18	16	16	15	14	12	19	16
A0A0G2K596	A0A0G2K596	Zc3h14			0.238564	0.021764	0.0868765	NaN	-0.267062	0.376667	0.302617	0.267596	0.130164	0.442082	-0.0900929	0.700221	0.302617	0.0102175	0.508031	0.315627	1	0.130164	0.980187	-0.0900929	NaN	0.0556871	0.153301	0.250273	4	2	2	17.8	7.4	7.4	35.06	0	84.207	392490000	180910000	211580000	1	1	1	1	1	1	0	2	0
A0A0G2QC15	A0A0G2QC15	Larp8			-0.152064	0.910412	-0.231456	-0.108841	-0.358609	-0.157843	-0.22505	-0.188001	0.379174	0.605361	-0.231456	0.0839136	-0.188001	0.0102699	0.508031	-0.190298	1	0.379174	0.61309	-0.232969	NaN	0.0336623	0.751284	0.124891	8	8	8	44	44	44	30.01	0	44.771	3681600000	1690900000	1990800000	3	3	3	4	2	3	2	2	3
D3ZJD2	D3ZJD2;A0A096MKB6	Atad2	ENSRNOG00000005036;ENSRNOG00000025604		0.283193	0.431054	0.178598	-0.675558	-0.384786	0.375778	0.433889	0.30281	0.357123	0.129955	-0.384786	0.361825	0.375778	0.0102957	0.508031	0.370826	1	0.357123	0.747663	-0.293915	69707400	0.0656798	0.104553	0.434268	34	34	33	34.5	34.5	33.6	156	0	323.31	12563000000	5509700000	7053600000	12	13	13	13	10	13	13	12	13
A0A0A0MY09	A0A0A0MY09;Q66HD0;A0A0G2K4I4;Q66HD0-2	Hsp90b1	ENSRNOG00000026963	Endoplasmin	-0.211304	-0.731175	0.233086	0.337584	-0.053822	-0.154428	-0.109367	-0.147666	-0.47124	0.320901	0.233086	0.278785	-0.147666	0.0103025	0.508031	-0.137154	1	-0.47124	0.694991	0.172282	27345700	0.0243005	0.367604	0.202663	52	52	50	61.2	61.2	59.5	92.899	0	323.31	517810000000	245990000000	271820000000	36	33	34	31	29	30	26	28	24
P41777	P41777	Nolc1		Nucleolar and coiled-body phosphoprotein 1	1.36514	1.49753	-0.257957	-0.408753	-0.431408	1.06822	0.95743	1.34544	1.43134	0.0294191	-0.408753	0.0214086	1.06822	0.0103813	0.508031	1.1237	1	1.43134	0.609869	-0.366039	NaN	0.199865	0.0936083	0.0942854	16	16	16	25.4	25.4	25.4	73.563	0	323.31	100080000000	39155000000	60926000000	8	8	9	6	9	8	10	11	9
G3V6P7	G3V6P7;Q62812	Myh9	ENSRNOG00000004860;ENSRNOG00000049236	Myosin-9	-0.427296	-1.19103	-0.480356	-0.025847	0.0930119	-0.249882	-0.356735	-0.293608	-0.809162	0.28071	-0.025847	0.513112	-0.293608	0.0105145	0.508031	-0.300075	1	-0.809162	0.849608	-0.13773	118863000	0.0537194	0.540039	0.302615	116	116	98	57.6	57.6	49.3	226.41	0	323.31	467810000000	236430000000	231380000000	73	81	76	81	77	74	70	76	71
Q497A7	Q497A7;A0A0G2JVL2;Q91Y53	Dnttip1	ENSRNOG00000014933	Deoxynucleotidyltransferase terminal-interacting protein 1	NaN	0.699568	-0.390318	-0.461394	-0.215195	0.759864	0.616944	0.534312	0.699568	1	-0.390318	0.0398059	0.616944	0.0105269	0.508031	0.63704	1	0.699568	0.609869	-0.355635	167398000	0.114111	NaN	0.126711	6	6	6	30.8	30.8	30.8	36.855	0	19.118	652150000	269940000	382220000	1	2	2	4	0	0	1	2	3
A0A0G2K3H5	A0A0G2K3H5;D3ZBP2	Sin3a	ENSRNOG00000032254		0.324946	0.377145	0.158685	-0.258643	-0.188905	0.198179	0.272621	0.278681	0.351045	0.0472445	-0.188905	0.533416	0.272621	0.010564	0.508031	0.249827	1	0.351045	0.864033	-0.0962876	60332800	0.0448308	0.0369103	0.223549	34	34	34	40.5	40.5	40.5	145.07	0	249.44	13868000000	6570300000	7297900000	13	19	13	12	11	9	9	12	12
Q6AY20	Q6AY20	M6pr	ENSRNOG00000014992	Cation-dependent mannose-6-phosphate receptor	-1.01057	0.124785	0.18942	0.386767	-0.215655	-0.448027	-0.3915	-0.560021	-0.442892	0.578214	0.18942	0.567822	-0.448027	0.0110799	0.508031	-0.466516	1	-0.442892	0.888991	0.120178	88235900	0.0857686	0.802817	0.307122	7	7	7	34.9	34.9	34.9	31.095	0	153.84	8755400000	4478900000	4276500000	3	3	3	4	4	4	3	4	1
B1WC16	B1WC16	Bclaf1			1.6802	1.39866	0.0492776	-0.0592047	-0.254674	1.77885	1.55924	1.22373	1.53943	0.0580516	-0.0592047	0.425833	1.55924	0.0110803	0.508031	1.5206	1	1.53943	0.789456	-0.0882004	NaN	0.279566	0.199074	0.154036	22	21	1	28.9	27.7	1.7	106.06	0	200.79	17972000000	7101900000	10870000000	8	14	10	8	8	8	6	10	7
A0A0G2K781	A0A0G2K781;D3ZJW3	Ppfibp1	ENSRNOG00000031709		1.24862	0.386038	0.644041	-0.017052	-0.566948	0.754665	0.960956	1.09903	0.817327	0.309109	-0.017052	0.959608	0.960956	0.0111829	0.508031	0.938216	1	0.817327	1	0.0200137	245466000	0.173303	0.609934	0.606345	10	10	8	14.2	14.2	12	116.1	0	25.715	849840000	354240000	495600000	4	3	1	1	1	1	0	1	0
D3ZHD6	D3ZHD6	Rbm15b	ENSRNOG00000014161		-0.361408	0.234133	0.337308	0.104927	0.657486	0.355493	0.285591	0.247012	-0.0636374	0.865963	0.337308	0.149322	0.285591	0.0113067	0.508031	0.296032	1	-0.0636374	0.64184	0.366574	114977000	0.0549889	0.421112	0.27744	7	6	6	11.4	10.6	10.6	97.229	0	36.938	3245600000	1279100000	1966600000	4	1	3	2	2	2	1	3	0
D4AAE2	D4AAE2	Mpzl2	ENSRNOG00000016085		0.316609	-0.0304571	0.175842	NaN	0.203107	0.164248	0.148004	0.112357	0.143076	0.561054	0.189474	0.0457253	0.148004	0.0115208	0.508031	0.141536	1	0.143076	0.609869	0.189474	47959100	0.0265429	0.245413	0.0192792	4	4	4	24.7	24.7	24.7	24.442	0	14.151	1241100000	548670000	692400000	1	1	1	1	0	1	1	1	2
B2GV38	B2GV38	Ubl4a	ENSRNOG00000037250	Ubiquitin-like protein 4A	0.206739	-0.821009	-0.251447	0.740667	0.234539	0.468722	0.510346	0.665938	-0.307135	0.657043	0.234539	0.488285	0.510346	0.0117687	0.508031	0.548336	1	-0.307135	0.833367	0.241253	152081000	0.103952	0.726728	0.496091	6	6	6	45.2	45.2	45.2	17.79	0	15.071	1052600000	338140000	714480000	1	1	1	1	1	1	0	1	1
B0BN20	B0BN20	Tspan6	ENSRNOG00000003786	Tetraspanin	-0.362242	-0.117576	0.637066	0.315566	-0.183825	-0.348688	-0.306294	-0.235766	-0.239909	0.300196	0.315566	0.395535	-0.306294	0.0120804	0.508031	-0.296916	1	-0.239909	0.770119	0.256269	104555000	0.0570424	0.173005	0.413646	3	3	3	15.9	15.9	15.9	27.535	0	13.757	2150100000	1196400000	953720000	2	1	2	2	2	2	2	2	1
A0A0G2JZF0	A0A0G2JZF0;B5DEG8	Sec24c	ENSRNOG00000009042		0.428246	-0.512325	-0.303118	0.239075	0.334398	0.32604	0.293831	0.423234	-0.0420396	0.943242	0.239075	0.694389	0.32604	0.0122825	0.508031	0.347702	1	-0.0420396	0.976516	0.0901181	8136410	0.0673661	0.665084	0.343872	18	18	18	23.8	23.8	23.8	114.7	0	72.913	3921200000	1727600000	2193600000	6	8	6	7	9	9	6	6	2
D3ZZZ9	D3ZZZ9	Ctnnd1	ENSRNOG00000030790		0.045575	-0.240748	0.29983	-0.340492	-0.128986	-0.212787	-0.194648	-0.144041	-0.0975867	0.619106	-0.128986	0.792341	-0.194648	0.0122909	0.508031	-0.183825	1	-0.0975867	1	-0.0565492	78523000	0.0356279	0.202461	0.326249	40	40	40	55.9	55.9	55.9	104.07	0	323.31	63166000000	31382000000	31784000000	21	22	22	21	20	21	18	17	18
A0A0G2K945	A0A0G2K945;D4A7Q9	Gtf3c3	ENSRNOG00000002091		0.178119	0.181318	-0.0315483	-0.252601	-0.118122	0.207236	0.152731	0.147309	0.179718	0.00566615	-0.118122	0.172404	0.152731	0.0125666	0.508031	0.169092	1	0.179718	0.644515	-0.134091	60683800	0.0331448	0.00226218	0.111388	17	17	17	27.5	27.5	27.5	98.502	0	89.354	2335200000	1152600000	1182600000	4	7	3	4	4	3	3	2	2
Q5FVN0	Q5FVN0	Lpcat3	ENSRNOG00000012269	Lysophospholipid acyltransferase 5	-0.276147	-0.672827	0.211582	-0.247644	-0.272914	-0.413551	-0.288528	-0.31254	-0.474487	0.25206	-0.247644	0.580209	-0.31254	0.0125858	0.508031	-0.338206	1	-0.474487	0.899824	-0.102992	224200000	0.0663458	0.280495	0.272722	8	8	8	19.3	19.3	19.3	56.017	0	58.862	4378500000	2144200000	2234200000	3	4	2	3	3	4	4	2	3
F1LVT6	F1LVT6;A0A0G2K1R8	Senp1	ENSRNOG00000022260		-0.34333	0.769941	0.108226	-0.370322	0.338567	0.387564	NaN	0.403268	0.213306	0.767032	0.108226	0.913987	0.395416	0.0126398	0.508031	0.395416	1	0.213306	1	0.0254904	138766000	0.0111042	0.787201	0.361614	8	8	8	19.7	19.7	19.7	72.255	0	17.202	339040000	147910000	191130000	1	2	0	0	1	0	2	0	3
Q00566-2	Q00566-2;A0A0G2JWK2;Q00566	Mecp2		Methyl-CpG-binding protein 2	0.913438	0.926231	-0.158458	-0.411325	-0.396526	0.846244	0.846087	1.17177	0.919834	0.0044268	-0.396526	0.0590337	0.846244	0.0126788	0.508031	0.9547	1	0.919834	0.609869	-0.322103	NaN	0.187987	0.00904568	0.141914	15	15	15	33.7	33.7	33.7	55.082	0	192.93	3202700000	1366200000	1836500000	3	8	4	5	3	5	2	5	2
Q6AY21	Q6AY21	G3bp2	ENSRNOG00000002433		0.0197377	-1.06754	-0.409241	0.348551	0.272618	0.113153	0.0828498	0.123469	-0.523899	0.511769	0.272618	0.796997	0.113153	0.0128509	0.508031	0.10649	1	-0.523899	1	0.0706424	17409500	0.0211132	0.768818	0.417322	12	10	10	34.7	31.8	31.8	50.77	0	175.23	7362200000	3534700000	3827500000	4	4	5	7	3	3	2	3	1
F1M4M5	F1M4M5	Gpatch8	ENSRNOG00000021044		0.737203	-0.0635297	-0.482444	-0.209664	0.287069	0.330439	0.442533	0.309293	0.336836	0.554727	-0.209664	0.609774	0.330439	0.0128799	0.508031	0.360755	1	0.336836	0.917641	-0.135013	90212100	0.0716071	0.566203	0.39015	7	7	7	6.9	6.9	6.9	166.14	0	32.043	1404600000	668030000	736540000	3	3	2	1	2	1	1	1	2
P30120	P30120	Timp1	ENSRNOG00000010208	Metalloproteinase inhibitor 1	-0.648218	-0.733831	0.986739	1.0238	0.182179	-0.37968	-0.306109	-0.255452	-0.691024	0.0393859	0.986739	0.116889	-0.306109	0.0129566	0.508031	-0.313747	1	-0.691024	0.638884	0.730906	2179960	0.0624652	0.0605374	0.475573	8	8	8	60.4	60.4	60.4	23.793	0	31.082	3051400000	1487900000	1563600000	4	4	3	3	3	3	2	2	4
B0BN64	B0BN64;A0A1B0GWN1	Polr1e	ENSRNOG00000012664		0.396442	0.40389	-0.297478	-0.448659	-0.399409	0.272894	0.399639	0.307894	0.400166	0.00592379	-0.399409	0.0133204	0.307894	0.0131092	0.508031	0.326809	1	0.400166	0.609869	-0.381849	65081600	0.0654554	0.00526608	0.0771052	14	14	14	51.4	51.4	51.4	48.769	0	194.04	6036300000	2924800000	3111600000	7	7	5	3	3	5	7	7	5
E9PU01	E9PU01	Chd4	ENSRNOG00000018309		0.521166	0.187668	0.0414433	-0.35828	-0.233214	0.468878	0.431715	0.313184	0.354417	0.279961	-0.233214	0.260602	0.431715	0.0131979	0.508031	0.404592	1	0.354417	0.68042	-0.18335	224631000	0.0813137	0.235819	0.204474	70	70	55	48.4	48.4	38	218.18	0	323.31	72471000000	33122000000	39349000000	30	37	33	34	35	34	38	31	40
D4A7V2	D4A7V2	Med7	ENSRNOG00000007053		NaN	-0.075216	NaN	NaN	NaN	NaN	-0.703079	-0.7331	-0.075216	1	NaN	1	-0.718089	0.0133055	0.508031	-0.718089	1	-0.075216	1	NaN	31347700	0.021228	NaN	NaN	2	2	2	15.9	15.9	15.9	27.239	0.0032148	2.9626	15471000	9043000	6428000	0	0	0	1	0	0	0	1	0
Q5XIP1	Q5XIP1	Pelo	ENSRNOG00000023127	Protein pelota homolog	NaN	-1.32034	NaN	1.15023	0.332629	1.00791	NaN	0.96643	-1.32034	1	0.741432	0.320789	0.987172	0.0133739	0.508031	0.987172	1	-1.32034	0.720403	0.741432	71808500	0.0293326	NaN	0.578135	5	5	5	21.8	21.8	21.8	43.407	0	16.787	189800000	70617000	119180000	0	1	0	0	0	0	1	0	0
Q7TMA5	Q7TMA5;F1M6Z1	Apob	ENSRNOG00000005542	Apolipoprotein B-100;Apolipoprotein B-48	-1.54942	-2.36609	-3.97062	-2.48297	-1.39261	-3.07283	-4.1446	-2.87537	-1.95776	0.130905	-2.48297	0.0728083	-3.07283	0.0134603	0.508031	-3.36427	1	-1.95776	0.609869	-2.6154	42956300	0.682964	0.577473	1.2941	9	6	6	2.2	1.3	1.3	536.02	0	19.668	5475600000	4740300000	735270000	5	3	3	2	2	3	5	4	5
Q62737	Q62737	Cyba	ENSRNOG00000013014	Cytochrome b-245 light chain	0.772632	0.913722	NaN	NaN	NaN	0.764275	0.825626	1.10708	0.843177	0.0531397	NaN	1	0.825626	0.0135035	0.508031	0.898993	1	0.843177	1	NaN	65959800	0.182799	0.0997661	NaN	2	2	2	11.5	11.5	11.5	20.75	0.00065345	4.419	360320000	81462000	278860000	1	1	1	1	1	1	1	1	1
B5DFH7	B5DFH7	Traf2	ENSRNOG00000006238		0.310388	-1.03395	-0.493511	0.582045	0.582919	-0.515938	-0.366791	-0.55166	-0.36178	0.685662	0.582045	0.596298	-0.515938	0.0137333	0.508031	-0.47813	1	-0.36178	0.910571	0.223818	2727490	0.0980624	0.95059	0.621225	4	4	4	9.3	9.3	9.3	55.562	0.00044238	4.7384	159850000	63064000	96786000	1	1	1	1	2	1	1	1	1
G3V6H9	G3V6H9;Q9Z2G8;D4AEJ0;	Nap1l1	ENSRNOG00000003890;ENSRNOG00000004457	Nucleosome assembly protein 1-like 1	-0.62222	-3.0826	-0.0487767	0.359443	0.508464	-0.332859	-0.31265	-0.221535	-1.85241	0.373203	0.359443	0.242825	-0.31265	0.013747	0.508031	-0.289014	1	-1.85241	0.669577	0.273043	90950300	0.059306	1.73975	0.288493	16	16	15	52.9	52.9	50.4	45.373	0	323.31	78779000000	37108000000	41672000000	11	11	11	10	9	9	7	7	6
Q4KM24	Q4KM24	Pex11b	ENSRNOG00000021216		NaN	NaN	-0.310343	0.589819	-0.752583	-0.838683	-0.565814	-0.645638	NaN	1	-0.310343	0.728285	-0.645638	0.0137596	0.508031	-0.683378	1	NaN	0.998851	-0.157702	218249000	0.140295	NaN	0.684094	2	2	2	8.9	8.9	8.9	28.642	0	8.4928	188520000	100640000	87879000	1	1	1	2	0	0	1	0	0
A0A0G2K3N1	A0A0G2K3N1;F1M8X9	Gbf1	ENSRNOG00000026048		-0.133648	-0.730288	0.608424	-0.470766	0.0243138	-0.107758	-0.121209	-0.079377	-0.431968	0.384769	0.0243138	0.878501	-0.107758	0.0140868	0.508031	-0.102781	1	-0.431968	1	0.0539905	273335000	0.0213554	0.421888	0.540206	26	26	26	21.1	21.1	21.1	205.33	0	121.92	1781400000	864570000	916850000	6	6	4	2	2	3	2	1	3
P97829	P97829;P97829-2;A0A0G2JTH4	Cd47		Leukocyte surface antigen CD47	0.226221	-0.189869	0.138369	-0.405931	-0.351988	0.123125	0.141109	0.183746	0.0181761	0.944522	-0.351988	0.355288	0.141109	0.0141834	0.508031	0.149326	1	0.0181761	0.742885	-0.206516	NaN	0.0311348	0.29422	0.299895	3	3	3	9.9	9.9	9.9	32.995	0	6.7454	3961400000	1871700000	2089700000	1	2	1	1	1	1	2	2	2
Q5XIF0	Q5XIF0	Tex264	ENSRNOG00000013201		-0.0787347	-0.47956	-0.111165	-0.263196	0.077662	-0.418794	-0.310003	-0.28643	-0.279147	0.396403	-0.111165	0.421435	-0.310003	0.014202	0.508031	-0.338409	1	-0.279147	0.787092	-0.0988997	114721000	0.0706059	0.283426	0.17076	4	4	4	28.5	28.5	28.5	33.771	0	17.071	772480000	395070000	377400000	2	1	1	0	1	1	1	1	1
D4AD70	D4AD70;P63174;D3ZW57;D3ZZH2;D4A862	Rpl38	ENSRNOG00000029377;ENSRNOG00000030747;ENSRNOG00000031434;ENSRNOG00000031798;ENSRNOG00000032847;ENSRNOG00000033484;ENSRNOG00000033686;ENSRNOG00000033808;ENSRNOG00000036729;ENSRNOG00000048701	60S ribosomal protein L38	1.87927	2.49497	-0.054338	0.634693	0.203099	1.92118	1.86517	2.66968	2.18712	0.0890238	0.203099	0.323479	1.92118	0.0142136	0.508031	2.15201	1	2.18712	0.721665	0.261152	72295000	0.449186	0.435368	0.348165	6	6	6	50	50	50	8.2458	0	44.895	13602000000	5594500000	8008000000	5	5	2	3	3	4	3	3	2
D3ZRN5	D3ZRN5	Trove2	ENSRNOG00000003434		-0.705335	-2.06323	0.196477	0.739333	0.605602	-0.426151	-0.57237	-0.654398	-1.38428	0.290294	0.605602	0.0878916	-0.57237	0.0143626	0.508031	-0.550973	1	-1.38428	0.61309	0.513804	65535500	0.115618	0.960176	0.282831	12	12	12	28.4	28.4	28.4	60.042	0	37.499	1639500000	829330000	810170000	4	1	3	4	2	1	2	2	2
F1LP64	F1LP64;A0A0G2JU73;A0A0A0MXY4;A0A1W2Q676;F1LP64-2	Trip12	ENSRNOG00000016963	E3 ubiquitin-protein ligase TRIP12	0.691501	0.0320557	-0.141746	-0.62868	-0.33499	0.524946	0.579211	0.378618	0.361778	0.47051	-0.33499	0.121314	0.524946	0.0143737	0.508031	0.494258	1	0.361778	0.638884	-0.368472	92039800	0.103758	0.466298	0.245187	54	54	54	39.2	39.2	39.2	223.93	0	323.31	28004000000	13293000000	14711000000	25	25	21	25	19	18	19	19	18
Q6AY25	Q6AY25	Tmed3	ENSRNOG00000013889	Transmembrane emp24 domain-containing protein 3	-0.541513	1.11598	0.0891683	0.266853	-0.324499	-0.500813	-0.330849	-0.394904	0.287235	0.787603	0.0891683	0.957626	-0.394904	0.0143761	0.508031	-0.408855	1	0.287235	1	0.0105073	96577000	0.0858367	1.17203	0.303422	5	5	5	30.3	30.3	30.3	25.51	0	6.019	2250800000	1047800000	1203000000	1	2	1	2	1	1	2	0	1
D3ZJX1	D3ZJX1	Rlf	ENSRNOG00000027921		0.350188	0.318577	0.261984	-0.0326701	-0.324632	1.07074	0.697161	0.939211	0.334383	0.030069	-0.0326701	0.868482	0.939211	0.0143833	0.508031	0.902372	1	0.334383	1	-0.0317727	143900000	0.189496	0.0223522	0.293309	3	3	3	2.6	2.6	2.6	214.49	0	29.364	265040000	106330000	158710000	1	2	2	1	1	1	1	1	1
F1LRC6	F1LRC6	Nup188	ENSRNOG00000025185		0.173448	-0.231565	0.0820677	-0.244164	-0.255684	0.310369	0.218707	0.219419	-0.0290588	0.909267	-0.244164	0.335412	0.219419	0.014557	0.508031	0.249498	1	-0.0290588	0.728201	-0.13926	14205300	0.0527165	0.286387	0.191762	33	33	33	32.3	32.3	32.3	171.48	0	180.76	7858700000	3694700000	4164000000	9	17	9	10	13	12	2	7	5
Q63355	Q63355	Myo1c	ENSRNOG00000004072	Unconventional myosin-Ic	-0.293267	-0.965303	0.165292	-0.255058	-0.371449	-0.199853	-0.210225	-0.29013	-0.629285	0.312231	-0.255058	0.445184	-0.210225	0.0146057	0.508031	-0.233403	1	-0.629285	0.80197	-0.153739	64185600	0.0493999	0.475201	0.282351	39	39	39	47.3	47.3	47.3	119.81	0	323.31	41130000000	20641000000	20489000000	17	18	16	16	12	18	14	19	13
G3V712	G3V712;A0A0G2K826	Krt7	ENSRNOG00000008057		0.182117	-0.591719	0.976323	0.46068	-0.136045	0.160588	0.195563	0.246867	-0.204801	0.690079	0.46068	0.309701	0.195563	0.0151841	0.508031	0.201006	1	-0.204801	0.719194	0.433652	140862000	0.0433964	0.547185	0.556676	33	28	13	71.6	64.6	40.7	50.806	0	323.31	282550000000	120880000000	161660000000	19	22	24	25	23	23	23	24	22
P21674	P21674	Fst	ENSRNOG00000011631	Follistatin	NaN	NaN	NaN	NaN	-0.181825	0.176158	NaN	0.167941	NaN	1	-0.181825	1	0.172049	0.0152007	0.508031	0.172049	1	NaN	1	-0.181825	65577800	0.00581079	NaN	NaN	2	2	2	12.8	12.8	12.8	37.838	0.00065118	4.3723	200970000	83389000	117580000	1	1	0	0	0	0	1	1	0
A0A0G2JTP7	A0A0G2JTP7;Q4KLY4	Rnf2	ENSRNOG00000002454	E3 ubiquitin-protein ligase RING2	0.309118	1.00501	0.842858	0.555522	-0.411132	0.625312	0.54112	0.401593	0.657065	0.310037	0.555522	0.477063	0.54112	0.0152238	0.508031	0.522675	1	0.657065	0.826197	0.329083	73792900	0.112995	0.492071	0.656947	10	10	8	46.7	46.7	37.8	37.623	0	45.891	1333800000	476720000	857110000	3	1	3	1	2	3	2	2	4
D3ZV33	D3ZV33;A0A0G2JY58	Pogz	ENSRNOG00000020962		0.261816	0.0924811	0.110898	-0.572423	-0.415726	0.318389	0.246234	0.383108	0.177149	0.283837	-0.415726	0.29272	0.318389	0.0153005	0.508031	0.31591	1	0.177149	0.702633	-0.292417	215507000	0.068471	0.119738	0.35796	16	16	16	21.6	21.6	21.6	149.85	0	93.634	2398800000	1128200000	1270600000	7	11	4	9	8	4	6	4	6
D4A652	D4A652;Q7TMD5;D4A7G0;Q7TMD5-2	Zc3h14	ENSRNOG00000004083	Zinc finger CCCH domain-containing protein 14	0.998855	1.30008	0.168669	0.141427	-0.258536	0.733153	0.834018	0.53539	1.14947	0.0829416	0.141427	0.912328	0.733153	0.0153019	0.508031	0.700854	1	1.14947	1	0.0171869	131952000	0.151911	0.212995	0.239171	20	20	18	43.5	43.5	39.1	82.597	0	323.31	4904800000	2077300000	2827400000	5	5	8	8	8	7	6	7	5
G3V659	G3V659;P52591	Pom121	ENSRNOG00000001449	Nuclear envelope pore membrane protein POM 121	1.71704	1.16525	0.201901	-0.163625	-0.357999	1.30889	1.90338	1.35258	1.44114	0.120418	-0.163625	0.582731	1.35258	0.0154404	0.508031	1.52162	1	1.44114	0.901492	-0.106574	26321900	0.331337	0.390172	0.284277	17	17	17	20.2	20.2	20.2	120.78	0	142.08	3523600000	1348900000	2174700000	4	4	10	8	12	8	7	4	2
A0A0G2K8F9	A0A0G2K8F9;D3ZQL8	Pum2	ENSRNOG00000006180		-0.558562	-0.613511	0.128029	0.176961	-0.853893	-0.299701	-0.465333	-0.376239	-0.586036	0.029824	0.128029	0.640442	-0.376239	0.015461	0.508031	-0.380424	1	-0.586036	0.938345	-0.182968	43569100	0.0828953	0.0388546	0.581553	8	8	6	10.6	10.6	7.8	106.15	0	15.475	570680000	308960000	261720000	1	2	1	2	1	3	1	3	2
Q6AXM8	Q6AXM8	Pon2	ENSRNOG00000009112	Serum paraoxonase/arylesterase 2	-0.286488	-0.632366	0.12213	-0.130666	-0.33395	-0.3344	-0.215169	-0.271236	-0.459427	0.229194	-0.130666	0.478038	-0.271236	0.0154775	0.508031	-0.273602	1	-0.459427	0.826319	-0.114162	30251600	0.0596509	0.244572	0.228488	13	13	13	60.2	60.2	60.2	39.617	0	111.87	18447000000	8693600000	9753600000	8	8	5	5	6	4	6	7	4
O55099	O55099	Aurkb	ENSRNOG00000005659	Aurora kinase B	0.282022	0.323866	0.442014	-0.17989	-0.527843	0.278104	0.256182	0.381458	0.302944	0.0438967	-0.17989	0.784408	0.278104	0.0156386	0.508031	0.305248	1	0.302944	1	-0.0885728	55369600	0.066904	0.0295881	0.491335	12	12	11	47.2	47.2	44.9	39.234	0	47.528	5624800000	2454900000	3169900000	7	7	6	6	6	5	8	8	5
Q9JKL8	Q9JKL8	Adnp		Activity-dependent neuroprotector homeobox protein	0.486589	1.40345	-0.00620973	-0.546911	-0.424879	0.88467	0.95564	1.31489	0.945017	0.287534	-0.424879	0.184722	0.95564	0.0156555	0.508031	1.05173	1	0.945017	0.648763	-0.326	NaN	0.230646	0.648315	0.283588	34	34	34	44	44	44	123.62	0	183.4	11622000000	5022600000	6599100000	11	15	12	11	10	8	6	9	7
D3ZTJ0	D3ZTJ0;A0A0G2JUM3	Rp2	ENSRNOG00000025428	Protein XRP2	0.457542	0.563158	0.109941	0.570047	0.0964301	0.257966	0.395816	0.380951	0.51035	0.0656402	0.109941	0.2383	0.380951	0.0156648	0.508031	0.344911	1	0.51035	0.668431	0.258806	2866100	0.0756623	0.074682	0.269627	5	5	5	20.1	20.1	20.1	39.32	0	19.377	1286100000	571290000	714810000	2	2	1	1	0	1	0	3	0
G3V7W1	G3V7W1;G3V7W1-2	Pdcd6	ENSRNOG00000014485		-0.250663	-1.81939	-0.584606	0.535592	0.368005	-0.423021	-0.384888	-0.271302	-1.03503	0.41284	0.368005	0.789304	-0.384888	0.0156686	0.508031	-0.359737	1	-1.03503	1	0.10633	33002300	0.0789246	1.10926	0.604207	8	8	8	58.1	58.1	58.1	21.904	0	68.925	3977500000	1922200000	2055300000	4	6	3	5	4	4	2	3	1
D4A0Y6	D4A0Y6	Mki67	ENSRNOG00000028137		1.77034	2.28013	0.521685	0.17359	-0.572865	1.6079	1.30176	2.02329	2.02523	0.0797047	0.17359	0.910993	1.6079	0.0157863	0.508031	1.64431	1	2.02523	1	0.0408031	214926000	0.36214	0.360472	0.559227	90	90	90	54.2	54.2	54.2	343.35	0	323.31	79545000000	28438000000	51107000000	39	39	44	39	49	40	47	51	40
D4A1N8	D4A1N8	Gdpd3	ENSRNOG00000019685		-0.584473	-0.730009	-0.0846309	0.185227	-0.202597	-0.752886	-0.944456	-1.17421	-0.657241	0.0701992	-0.0846309	0.794993	-0.944456	0.0158069	0.508031	-0.957183	1	-0.657241	1	-0.0340001	205179000	0.210948	0.10291	0.198808	8	8	8	27	27	27	38.267	0	37.054	2933500000	1421400000	1512100000	4	1	3	2	3	3	2	3	1
A0A0G2KB73	A0A0G2KB73	Rif1			0.749309	0.562211	0.371276	-0.254997	-0.630607	0.777669	0.860341	0.549868	0.65576	0.0902099	-0.254997	0.616813	0.777669	0.0158195	0.508031	0.729293	1	0.65576	0.922276	-0.171443	NaN	0.16079	0.132298	0.506141	50	50	50	33.6	33.6	33.6	266.24	0	299.23	8483700000	3811100000	4672500000	18	17	13	12	13	11	16	20	19
G3V968	G3V968	Mphosph10	ENSRNOG00000016266		0.417147	0.710804	-0.273564	-0.683135	-0.593914	0.380152	0.436595	0.580781	0.563976	0.162142	-0.593914	0.0532949	0.436595	0.0160478	0.508031	0.465843	1	0.563976	0.609869	-0.516871	126322000	0.103463	0.207647	0.21538	14	14	14	29.9	29.9	29.9	77.827	0	84.075	15794000000	6869900000	8924300000	7	7	10	8	9	8	8	9	7
O70188	O70188	Nfic	ENSRNOG00000004505	Nuclear factor 1	0.549193	NaN	NaN	NaN	-0.7596	0.809661	0.546996	0.578382	0.549193	1	-0.7596	1	0.578382	0.0160903	0.508031	0.645013	1	0.549193	1	-0.7596	11319200	0.143451	NaN	NaN	3	2	2	11.8	9.3	9.3	48.742	0	10.831	122540000	55900000	66640000	0	2	1	1	1	1	2	2	0
Q3KRF3	Q3KRF3		ENSRNOG00000019169	Uncharacterized protein C1orf131 homolog	0.988803	1.48077	-0.256006	-0.458354	-0.638413	1.01921	0.930087	1.39826	1.23479	0.125183	-0.458354	0.0550891	1.01921	0.0161451	0.508031	1.11585	1	1.23479	0.609869	-0.450925	68313500	0.248598	0.347872	0.191312	4	4	4	24.5	24.5	24.5	31.829	0	14.119	688090000	284880000	403210000	2	1	2	1	2	1	2	2	2
A0A0G2K174	A0A0G2K174;A0A0G2K8R3	Lmo7			0.972838	-0.0472619	0.798078	-0.137629	-0.411716	0.936501	0.763103	0.594643	0.462788	0.530904	-0.137629	0.841931	0.763103	0.0162486	0.508031	0.764749	1	0.462788	1	0.0829111	NaN	0.170935	0.72132	0.634334	57	57	57	52.5	52.5	52.5	156.76	0	323.31	101400000000	43481000000	57917000000	34	39	34	34	37	39	29	36	23
Q56R17	Q56R17	Kpna4	ENSRNOG00000010768	Importin subunit alpha	0.305083	-0.117495	-0.0609501	0.116408	0.192478	0.235781	0.150089	0.189441	0.093794	0.734032	0.116408	0.385779	0.189441	0.0162702	0.508031	0.19177	1	0.093794	0.766731	0.0826451	185044000	0.0428933	0.298807	0.130044	13	10	10	40.5	30.7	30.7	57.922	0	220.01	14621000000	6624500000	7996800000	10	9	8	9	6	9	5	4	5
P70645	P70645;A1A5L1;A0A096MJX0	Blmh	ENSRNOG00000003563	Bleomycin hydrolase	-0.288625	-1.61613	0.010517	0.571837	0.437847	-0.648643	-0.409566	-0.563114	-0.952376	0.387492	0.437847	0.182256	-0.563114	0.0163386	0.508031	-0.540441	1	-0.952376	0.64808	0.340067	62896500	0.121141	0.938686	0.293156	18	18	18	61.2	61.2	61.2	52.322	0	77.894	5137400000	2501900000	2635500000	0	1	0	2	2	2	4	4	2
P13832	P13832	Rlc-a	ENSRNOG00000015278	Myosin regulatory light chain RLC-A	-0.293266	-0.776153	-0.228179	0.247118	0.204251	-0.193266	-0.259824	-0.170011	-0.53471	0.270013	0.204251	0.672542	-0.193266	0.0163782	0.508031	-0.2077	1	-0.53471	0.962705	0.0743966	118780000	0.0466141	0.341453	0.262913	9	9	2	62.8	62.8	22.1	19.895	0	323.31	56057000000	27377000000	28680000000	7	7	8	8	8	8	8	7	7
F1MAA5	F1MAA5;Q66H32	Rangap1	ENSRNOG00000031789		0.710928	-0.00569071	0.265077	-0.0553563	-0.159187	0.311414	0.486085	0.377119	0.352618	0.505096	-0.0553563	0.90712	0.377119	0.0165061	0.508031	0.391539	1	0.352618	1	0.0168444	122915000	0.0882241	0.506726	0.221155	26	26	26	61.6	61.6	61.6	63.142	0	323.31	53829000000	24251000000	29578000000	15	17	13	14	12	14	16	15	16
Q68FS4-2	Q68FS4-2;Q68FS4	Lap3	ENSRNOG00000003289	Cytosol aminopeptidase	-0.151372	-1.33492	-0.13563	0.290565	0.236213	-0.135575	-0.118207	-0.0852202	-0.743147	0.428118	0.236213	0.432976	-0.118207	0.0166532	0.508031	-0.113001	1	-0.743147	0.792287	0.130383	70145300	0.0255781	0.836896	0.231971	26	26	26	72.7	72.7	72.7	52.758	0	323.31	25522000000	12716000000	12806000000	10	12	11	10	9	11	12	11	12
A0A0G2K4G0	A0A0G2K4G0	Rai1			0.576387	1.42134	-0.146073	-0.157611	-0.237606	0.9578	0.650444	1.02374	0.998865	0.254737	-0.157611	0.0245137	0.9578	0.0167595	0.508031	0.877329	1	0.998865	0.609869	-0.18043	NaN	0.199235	0.597473	0.0498511	20	20	20	20.7	20.7	20.7	201.06	0	125.79	4887800000	2061100000	2826800000	6	7	5	7	4	6	3	3	3
M0R7E6	M0R7E6	Srrt	ENSRNOG00000048277		0.148835	0.0863928	-0.151545	-0.230332	-0.0365947	0.273799	0.264601	0.175562	0.117614	0.165183	-0.151545	0.131333	0.264601	0.016888	0.508031	0.237987	1	0.117614	0.639843	-0.139491	24473100	0.0542575	0.0441529	0.0974295	15	15	15	36	36	36	54.984	0	222.17	23462000000	11087000000	12375000000	6	7	5	7	8	7	8	9	9
Q6P6T9	Q6P6T9;M0R7I0	Kpna2	ENSRNOG00000015329;ENSRNOG00000030058	Importin subunit alpha	0.0635135	-0.142413	0.514759	0.109222	-0.148855	0.166423	0.104526	0.149225	-0.0394497	0.767066	0.109222	0.49839	0.149225	0.0169082	0.508031	0.140058	1	-0.0394497	0.840395	0.158375	57786100	0.0319507	0.145612	0.334527	23	23	23	68.4	68.4	68.4	57.836	0	323.31	52051000000	24943000000	27108000000	17	15	13	15	16	14	16	14	13
D4A1X2	D4A1X2	Exosc10	ENSRNOG00000010719		0.676358	0.500211	-0.164419	-0.581636	-0.261452	0.379258	0.360972	0.241693	0.588284	0.094607	-0.261452	0.116723	0.360972	0.0169255	0.508031	0.327308	1	0.588284	0.638884	-0.335836	169032000	0.0747061	0.124554	0.218328	30	30	30	49	49	49	100.72	0	112.6	8827400000	4224900000	4602500000	7	10	9	11	8	8	7	13	8
A0A0G2K9X3	A0A0G2K9X3;A0A0G2K4Y7;Q9QYF3	Myo5a		Unconventional myosin-Va	-0.113057	-0.96287	0.151231	0.682348	0.116097	-0.331782	-0.20829	-0.299758	-0.537964	0.425591	0.151231	0.226099	-0.299758	0.0170241	0.508031	-0.279943	1	-0.537964	0.667493	0.316558	NaN	0.064086	0.600909	0.31727	20	20	1	14.1	14.1	0.8	210.85	0	83.067	3215300000	1507400000	1707900000	7	9	10	6	6	7	2	5	7
F1M6W2	F1M6W2;Q6UPR8	Ermp1	ENSRNOG00000010915	Endoplasmic reticulum metallopeptidase 1	-0.205818	-0.532798	0.0379434	-0.0704893	-0.436464	-0.324128	-0.210647	-0.32532	-0.369308	0.265318	-0.0704893	0.389777	-0.324128	0.0171418	0.508031	-0.286698	1	-0.369308	0.76867	-0.156337	255038000	0.0658648	0.23121	0.248582	13	13	13	23.1	23.1	23.1	99.979	0	66.237	4355400000	1984600000	2370800000	4	6	3	4	2	4	3	3	2
E9PU66	E9PU66;A0A0G2K3B7	Wnt7b	ENSRNOG00000015750	Protein Wnt	NaN	-1.22092	-1.09283	-1.40142	-0.461345	-0.233905	NaN	-0.247045	-1.22092	1	-1.09283	0.0706081	-0.240475	0.0173881	0.508031	-0.240475	1	-1.22092	0.609869	-0.985199	126137000	0.00929103	NaN	0.479191	2	2	2	9.8	9.8	9.8	38.913	0	94.044	265730000	182620000	83108000	0	1	0	0	0	0	1	1	1
F1M9N7	F1M9N7;Q4KLH5	Agfg1	ENSRNOG00000015619	Arf-GAP domain and FG repeat-containing protein 1	1.18231	2.6635	0.397912	NaN	0.491619	0.796432	0.753562	NaN	1.92291	0.234043	0.444766	0.0668177	0.774997	0.0176029	0.508031	0.774997	1	1.92291	0.609869	0.444766	88354900	0.0303131	1.04736	0.0662608	6	6	6	21.1	21.1	21.1	58.054	0	16.852	592220000	237110000	355110000	1	0	1	2	0	1	0	0	1
Q62806	Q62806	Znf148	ENSRNOG00000001789	Zinc finger protein 148	1.06885	1.61452	0.403778	-0.375426	-0.538382	1.0141	0.679415	1.08183	1.34168	0.127718	-0.375426	0.617879	1.0141	0.0176048	0.508031	0.925114	1	1.34168	0.922276	-0.17001	73602100	0.215459	0.385848	0.50355	16	16	16	40.2	40.2	40.2	88.747	0	72.955	3178100000	1824600000	1353500000	7	3	3	2	4	4	7	6	3
Q5BJP2	Q5BJP2;D3ZS22	Cwc15	ENSRNOG00000008490;ENSRNOG00000025157	Spliceosome-associated protein CWC15 homolog	0.252021	1.08984	-0.121083	-0.227202	-0.366636	0.802325	0.61343	0.987464	0.670929	0.355327	-0.227202	0.078661	0.802325	0.0176876	0.508031	0.801073	1	0.670929	0.61309	-0.238307	55222000	0.18702	0.592425	0.123153	7	7	7	45.9	45.9	45.9	26.638	0	19.797	2558200000	1180000000	1378200000	2	1	2	2	3	2	3	3	0
A0A0G2K277	A0A0G2K277;Q5M884	Eci3	ENSRNOG00000029549		-0.390642	-0.834887	0.0565438	0.140719	-0.027993	-0.300362	-0.213103	-0.34694	-0.612765	0.221391	0.0565438	0.366292	-0.300362	0.0181969	0.508031	-0.286802	1	-0.612765	0.748586	0.0564234	32517400	0.067941	0.314129	0.0843562	8	5	5	35.1	22.7	22.7	42.324	0	85.507	6182900000	2862900000	3320000000	6	5	5	6	3	6	2	4	3
Q6MG13	Q6MG13;A0A0G2K2E8;A0A0G2KAY1	Dhx16	ENSRNOG00000030157		0.0237411	0.195251	-0.0924989	-0.210074	0.0806621	0.400459	0.584626	0.649613	0.109496	0.42297	-0.0924989	0.4734	0.584626	0.0182402	0.508031	0.544899	1	0.109496	0.823275	-0.0739701	5466490	0.12924	0.121276	0.146251	13	12	12	16	15.1	15.1	119.26	0	64.793	1325000000	594440000	730560000	6	3	3	2	4	5	2	5	2
G3V8A4	G3V8A4;Q9Z2Q4	Mtr	ENSRNOG00000017593	Methionine synthase	-0.087371	-0.890974	NaN	NaN	NaN	-0.30969	-0.488963	-0.48042	-0.489172	0.437771	NaN	1	-0.48042	0.0182414	0.508031	-0.426358	1	-0.489172	1	NaN	67958300	0.101128	0.568233	NaN	2	2	2	2.3	2.3	2.3	139.19	0.0026596	3.2305	1694100000	856220000	837870000	2	1	1	1	1	1	1	1	0
A0A0G2K736	A0A0G2K736;F1MA31	Kdm1a	ENSRNOG00000022372		0.329643	0.145623	0.10992	-0.11292	-0.0884997	0.4168	0.493517	0.302862	0.237633	0.23518	-0.0884997	0.707711	0.4168	0.0182463	0.508031	0.404393	1	0.237633	0.985755	-0.0304998	158674000	0.0959309	0.130122	0.122219	23	23	23	42.7	42.7	42.7	93.969	0	85.814	4197000000	1843700000	2353300000	9	6	5	7	7	5	5	4	8
A0A0G2JTI7	A0A0G2JTI7;D3ZI99	Prpf3	ENSRNOG00000025629		0.602587	0.707446	-0.134113	-0.41596	-0.354215	0.918917	0.600937	0.647371	0.655016	0.0508487	-0.354215	0.0719425	0.647371	0.0183265	0.508031	0.722408	1	0.655016	0.609869	-0.301429	217438000	0.171758	0.0741468	0.148153	21	21	21	42.9	42.9	42.9	77.44	0	308.33	19925000000	9126700000	10798000000	9	11	7	5	10	9	6	8	8
D4A0U0	D4A0U0;A0A140UHX0;P09215;P09215-2	Prkcd	ENSRNOG00000016346	Protein kinase C delta type;Protein kinase C delta type catalytic subunit;Protein kinase C delta type regulatory subunit	-1.40801	NaN	0.619178	-0.279779	0.353916	-0.225616	-0.212919	NaN	-1.40801	1	0.353916	0.477505	-0.219267	0.0184271	0.508031	-0.219267	1	-1.40801	0.826197	0.231105	6588980	0.00897815	NaN	0.461891	7	7	7	14.1	14.1	14.1	77.271	0	18.002	551610000	272360000	279250000	0	1	0	1	0	2	0	0	0
A0A0G2K6H2	A0A0G2K6H2;P57113	Gstz1	ENSRNOG00000047708	Maleylacetoacetate isomerase	NaN	-0.393634	NaN	NaN	0.572211	0.41511	0.440421	NaN	-0.393634	1	0.572211	1	0.427765	0.0188291	0.508031	0.427765	1	-0.393634	1	0.572211	120461000	0.0178976	NaN	NaN	4	4	4	34.4	34.4	34.4	23.862	0	8.1543	67460000	29564000	37896000	0	1	3	0	0	0	0	0	2
M0R6J5	M0R6J5	Nom1	ENSRNOG00000048969		0.00882658	0.346776	-0.0894882	-0.40123	-0.406305	0.680871	0.416432	0.621042	0.177801	0.483799	-0.40123	0.103976	0.621042	0.0189822	0.508031	0.572782	1	0.177801	0.631155	-0.299008	2392800	0.138668	0.238966	0.181467	11	11	11	20.1	20.1	20.1	91.46	0	85.775	3051100000	1490400000	1560600000	4	4	3	6	5	3	2	5	3
D3ZF26	D3ZF26	Tnks1bp1	ENSRNOG00000009195		1.51982	0.402919	0.21835	0.653893	0.467046	0.860566	1.06143	1.39005	0.961369	0.335021	0.467046	0.0714046	1.06143	0.0189855	0.508031	1.10402	1	0.961369	0.609869	0.446429	78972400	0.267301	0.789768	0.218502	29	29	29	27.2	27.2	27.2	180.01	0	289.25	3316600000	1220600000	2096000000	9	8	6	4	9	11	10	7	4
D3ZME7	D3ZME7	Hscb	ENSRNOG00000037508		0.134484	0.0130661	NaN	NaN	0.184123	0.289385	0.439235	0.471448	0.073775	0.438341	0.184123	1	0.439235	0.0191025	0.508031	0.400023	1	0.073775	1	0.184123	53616700	0.097159	0.0858553	NaN	5	5	5	24.8	24.8	24.8	27.065	0	8.3623	311350000	126290000	185060000	2	2	3	1	1	1	1	0	1
A0A0G2JSU3	A0A0G2JSU3;Q63945;D4A466	Set	ENSRNOG00000028984	Protein SET	-0.477092	-2.75678	-0.280528	0.182906	0.438428	-0.236262	-0.210735	-0.330477	-1.61693	0.390906	0.182906	0.643347	-0.236262	0.0191754	0.508031	-0.259158	1	-1.61693	0.940779	0.113602	90799800	0.0630687	1.61198	0.364454	12	12	3	50.5	50.5	14.2	33.381	0	323.31	67051000000	33941000000	33110000000	7	6	7	5	5	6	5	5	5
D4A914	D4A914	Xrn2	ENSRNOG00000011785		0.510728	0.329493	-0.0311279	-0.324871	-0.193892	0.450289	0.408275	0.274094	0.420111	0.135246	-0.193892	0.16367	0.408275	0.0192348	0.508031	0.377553	1	0.420111	0.64184	-0.183297	147643000	0.0920277	0.128152	0.147158	41	41	41	62.4	62.4	62.4	108.65	0	323.31	40410000000	18119000000	22291000000	20	21	20	16	16	17	19	19	17
Q9WUC8	Q9WUC8	Plrg1	ENSRNOG00000006655	Pleiotropic regulator 1	-0.0451129	0.463954	0.0218172	-0.295398	-0.334742	0.165933	0.193966	0.264621	0.209421	0.561708	-0.295398	0.214242	0.193966	0.0193183	0.508031	0.208173	1	0.209421	0.666905	-0.202774	201455000	0.050855	0.359965	0.195494	18	18	18	56	56	56	57.188	0	323.31	28085000000	13009000000	15076000000	12	13	10	11	15	15	10	10	10
A1L1K3	A1L1K3;A0A0H2UH97	Anapc5	ENSRNOG00000001316	Anaphase-promoting complex subunit 5	-0.309498	-0.637851	NaN	0.488385	0.214166	0.0980816	0.150433	0.103637	-0.473675	0.212405	0.351275	0.236908	0.103637	0.0194226	0.508031	0.117384	1	-0.473675	0.668431	0.351275	41102300	0.0287556	0.232181	0.193903	10	10	10	22.3	22.3	22.3	81.738	0	14.328	437240000	194550000	242690000	3	4	2	2	2	2	1	2	2
Q6TRW4-3	Q6TRW4-3;Q6TRW4-2;D3ZU56;F1M797;Q6TRW4;D3ZXE2;D3ZMU3	Pds5b	ENSRNOG00000001098	Sister chromatid cohesion protein PDS5 homolog B	0.231006	0.295211	-0.0532203	-0.390764	-0.327857	0.420827	0.285443	0.277226	0.263108	0.0772936	-0.327857	0.131092	0.285443	0.0195786	0.508031	0.327832	1	0.263108	0.639843	-0.257281	687516	0.0806406	0.0453998	0.179499	36	36	32	32.9	32.9	30.2	164.2	0	260.28	16693000000	7634200000	9058500000	18	20	17	14	16	16	11	13	10
A0A0H2UHG7	A0A0H2UHG7;D3ZZK1;A0A0G2K6L6;P60868;A0A0G2JY70;M0RB28;M0R5V6;M0R566;A0A0G2K8W1;M0R987;A0A0G2K3E9	Rps20	ENSRNOG00000008555;ENSRNOG00000029341;ENSRNOG00000029627;ENSRNOG00000029843;ENSRNOG00000030206;ENSRNOG00000030426;ENSRNOG00000030596;ENSRNOG00000031205;ENSRNOG00000033541;ENSRNOG00000048426	40S ribosomal protein S20	-0.690747	-2.54386	-0.112907	0.448824	0.284294	-0.481852	-0.290729	-0.39082	-1.6173	0.331205	0.284294	0.340739	-0.39082	0.0196606	0.508031	-0.387801	1	-1.6173	0.731447	0.206737	35370900	0.0955973	1.31035	0.288785	5	5	5	29.7	29.7	29.7	13.241	0	85.003	67581000000	34734000000	32848000000	2	3	3	2	2	2	3	2	2
D4A005	D4A005;A0A0G2K889	Ehmt1	ENSRNOG00000007242		0.505762	0.353358	0.16163	-0.423872	-0.464833	0.457073	0.458495	0.284858	0.42956	0.11177	-0.423872	0.353701	0.457073	0.0201282	0.508031	0.400142	1	0.42956	0.742885	-0.242358	1952110	0.0998416	0.107766	0.350463	23	23	22	31.1	31.1	30.3	138.91	0	118.49	7655800000	3386900000	4268900000	10	14	11	11	8	14	7	8	10
D3ZEZ9	D3ZEZ9;F1M155	Svil	ENSRNOG00000018110		0.98002	1.63618	0.345098	0.06226	-0.111081	0.526756	0.856309	0.838859	1.3081	0.156442	0.06226	0.534975	0.838859	0.0202624	0.508031	0.740641	1	1.3081	0.864426	0.0987591	52916400	0.185435	0.463976	0.230269	17	17	17	12.5	12.5	12.5	215.47	0	39.601	382620000	139040000	243580000	3	4	0	2	2	1	6	5	1
Q6AY79	Q6AY79	Hgh1	ENSRNOG00000029238	Protein HGH1 homolog	-0.529916	-1.28505	NaN	NaN	NaN	-0.369993	-0.221738	-0.294783	-0.907482	0.251002	NaN	1	-0.294783	0.0203391	0.508031	-0.295505	1	-0.907482	1	NaN	117422000	0.0741302	0.533959	NaN	10	10	10	43.3	43.3	43.3	43.131	0	28.935	704050000	377090000	326960000	3	2	1	3	1	3	1	4	1
D4A1R0	D4A1R0	Dhx37	ENSRNOG00000022171		0.369279	0.318594	-0.461383	-0.675025	-0.457271	0.468135	0.397263	0.278733	0.343936	0.0468239	-0.461383	0.0178348	0.397263	0.0203485	0.508031	0.381377	1	0.343936	0.609869	-0.531226	38472200	0.0956949	0.0358397	0.12455	31	31	31	38	38	38	128.63	0	229.37	15482000000	8435600000	7046400000	15	13	10	13	10	12	10	12	13
G3V6M8	G3V6M8;B1WBY6	Nup37	ENSRNOG00000004727		0.237851	0.18241	0.0509408	-0.469284	-0.393267	0.112111	0.1207	0.0724708	0.21013	0.0835004	-0.393267	0.237326	0.112111	0.0206474	0.508031	0.10176	1	0.21013	0.668431	-0.270537	28825300	0.0257264	0.0392024	0.28099	14	13	13	54	51.8	51.8	36.768	0	109.17	7494200000	3688800000	3805400000	5	6	3	5	3	3	3	2	3
D4A9D8	D4A9D8	Osbp	ENSRNOG00000021057	Oxysterol-binding protein	0.952537	0.0672264	NaN	-0.360935	0.281228	0.880036	0.542533	0.877533	0.509882	0.455144	-0.0398531	0.921384	0.877533	0.0207107	0.508031	0.7667	1	0.509882	1	-0.0398531	235460000	0.194139	0.626009	0.454078	16	16	15	26.2	26.2	23.9	77.806	0	71.806	3040000000	1395700000	1644300000	3	3	4	5	4	7	1	3	3
G3V779	G3V779	Lad1	ENSRNOG00000009144		1.60836	1.30745	-0.235013	-0.213654	0.0717559	0.800528	1.35119	1.12259	1.45791	0.0654668	-0.213654	0.331706	1.12259	0.0207522	0.508031	1.09144	1	1.45791	0.72296	-0.125637	57693600	0.276652	0.212775	0.17128	18	18	18	35.1	35.1	35.1	57.396	0	89.502	6701500000	2848200000	3853400000	5	9	5	2	5	6	4	9	6
D3ZYQ9	D3ZYQ9	Rnf20	ENSRNOG00000006087		-0.85828	NaN	0.246259	0.681584	0.562067	0.500552	0.53436	NaN	-0.85828	1	0.562067	0.0620699	0.517456	0.0207899	0.508031	0.517456	1	-0.85828	0.609869	0.496636	69386900	0.0239064	NaN	0.224918	7	5	5	8.4	5.5	5.5	113.46	0	10.204	573290000	227100000	346190000	1	1	1	0	2	2	0	0	0
Q63699	Q63699;Q6P751	Cdk2	ENSRNOG00000006469	Cyclin-dependent kinase 2	-0.132135	-1.04219	0.670478	0.049469	0.119695	-0.47917	-0.32733	-0.306683	-0.587161	0.419714	0.119695	0.290105	-0.32733	0.0208112	0.508031	-0.371061	1	-0.587161	0.699402	0.279881	3097650	0.0941927	0.643503	0.340085	10	8	8	49.7	43.3	43.3	33.887	0	20.916	1606600000	669740000	936850000	1	3	2	2	1	5	3	3	4
D4A259	D4A259	Polr2d	ENSRNOG00000016231		0.72657	0.251731	0.0285691	-0.168723	NaN	0.217851	NaN	0.23264	0.48915	0.287673	-0.0700768	0.606783	0.225245	0.0208916	0.508031	0.225245	1	0.48915	0.916411	-0.0700768	24288000	0.0104573	0.335762	0.139506	4	4	4	48.6	48.6	48.6	16.311	0	11.991	150390000	67269000	83116000	1	0	0	0	1	2	1	1	2
D3ZHU8	D3ZHU8	Rbm19	ENSRNOG00000001397		0.152486	0.269675	-0.12751	-0.446908	-0.473166	0.132383	0.203298	0.135807	0.211081	0.172381	-0.446908	0.0880622	0.135807	0.0209085	0.508031	0.157162	1	0.211081	0.61309	-0.349195	43816200	0.0399913	0.0828651	0.192433	25	25	25	38.1	38.1	38.1	106.36	0	289.63	11955000000	5832000000	6123400000	13	12	11	12	14	12	6	8	10
Q641Z4	Q641Z4	Cdk9	ENSRNOG00000022586	Cyclin-dependent kinase 9	-0.347325	1.25535	NaN	NaN	0.695126	0.0828389	0.127237	0.138993	0.454014	0.671838	0.695126	1	0.127237	0.02092	0.508031	0.116356	1	0.454014	1	0.695126	17081200	0.0296163	1.13326	NaN	11	10	10	42.7	40.6	40.6	42.761	0	46.758	738360000	330330000	408030000	2	1	1	2	1	3	1	3	3
F1M8K7	F1M8K7;Q5M7T0	Alg3	ENSRNOG00000001712		-0.0187263	-0.507952	0.163171	-0.0941425	-0.579438	-0.611357	-0.506861	-0.832182	-0.263339	0.476541	-0.0941425	0.516348	-0.611357	0.0210702	0.508031	-0.650133	1	-0.263339	0.850833	-0.170137	87058600	0.166091	0.345935	0.377092	3	3	3	7.8	7.8	7.8	50.18	0.00044346	4.8005	935860000	497170000	438690000	2	2	2	1	1	1	2	2	2
D3Z9Z2	D3Z9Z2	Lipt2	ENSRNOG00000016906	Putative lipoyltransferase 2, mitochondrial	0.081067	NaN	-0.121176	0.407935	0.127864	-0.731494	-0.781769	NaN	0.081067	1	0.127864	0.461271	-0.756631	0.0211428	0.508031	-0.756631	1	0.081067	0.812544	0.138208	171372000	0.0355501	NaN	0.264707	3	3	3	22.5	22.5	22.5	25.197	0	10.5	221800000	94397000	127400000	0	1	1	1	1	1	0	0	0
P63036	P63036	Dnaja1	ENSRNOG00000007029	DnaJ homolog subfamily A member 1	-0.275356	-1.14728	-0.386237	-0.0374113	0.351166	-0.184347	-0.108812	-0.163962	-0.711319	0.350043	-0.0374113	0.920039	-0.163962	0.0212287	0.508031	-0.152374	1	-0.711319	1	-0.0241609	61562300	0.0390782	0.616544	0.36888	12	12	12	52.6	52.6	52.6	44.868	0	270.76	19458000000	9221100000	10237000000	7	8	8	7	8	8	6	5	4
Q62636	Q62636	Rap1b	ENSRNOG00000007048	Ras-related protein Rap-1b	-0.247799	-0.85503	-0.161289	-0.265051	-0.406369	-0.169924	-0.175491	-0.262898	-0.551415	0.320419	-0.265051	0.0596745	-0.175491	0.0213417	0.508031	-0.202771	1	-0.551415	0.609869	-0.27757	60851000	0.052146	0.429377	0.123019	11	11	5	57.1	57.1	29.9	20.798	0	323.31	50143000000	25637000000	24505000000	7	8	8	7	7	7	6	8	6
D4AB03	D4AB03;A0A1W2Q6F9;A0A1W2Q678	Fam120a	ENSRNOG00000016779		-0.269606	-1.46892	0.0852256	0.580641	0.24342	-0.234772	-0.204526	-0.137836	-0.869262	0.384441	0.24342	0.173711	-0.204526	0.021445	0.508031	-0.192378	1	-0.869262	0.645565	0.303096	18167800	0.0495967	0.848043	0.253041	35	35	35	45.9	45.9	45.9	122.14	0	300.73	14715000000	7669500000	7045100000	16	13	15	14	16	14	10	10	7
D4ADE7	D4ADE7	Cd3eap	ENSRNOG00000016825		0.820128	0.609967	-0.0919953	-0.754878	-0.476444	0.672651	1.00233	0.643135	0.715048	0.0928902	-0.476444	0.148619	0.672651	0.0214866	0.508031	0.772707	1	0.715048	0.641577	-0.441106	81534000	0.19941	0.148606	0.332851	15	15	15	62	62	62	49.412	0	193.02	5206100000	2363800000	2842300000	7	3	4	6	6	5	10	8	10
P13084	P13084;P13084-2;D3ZXI2;F7FKF2	Npm1	ENSRNOG00000004616;ENSRNOG00000018923;ENSRNOG00000032995	Nucleophosmin	0.212342	0.063235	-0.0966568	-0.448926	-0.324046	0.14326	0.24472	0.206522	0.137788	0.315739	-0.324046	0.106673	0.206522	0.0215704	0.508031	0.198168	1	0.137788	0.631155	-0.289876	27956500	0.0512435	0.105434	0.178603	13	13	11	64.4	64.4	56.8	32.56	0	323.31	519270000000	251390000000	267880000000	9	8	8	7	7	7	7	8	7
D4A3I4	D4A3I4;A0A0G2K4W2;A0A0G2K8T5	Btf3l4	ENSRNOG00000008512	Transcription factor BTF3	-0.810509	-2.57182	0.322736	0.67238	0.694292	-0.359152	-0.384605	NaN	-1.69117	0.305642	0.67238	0.042776	-0.371879	0.0217775	0.508031	-0.371879	1	-1.69117	0.609869	0.563136	132272000	0.0179976	1.24544	0.208481	6	6	6	55.1	55.1	55.1	17.27	0	143.82	2204300000	1065000000	1139300000	2	2	1	1	1	2	0	0	1
Q9JMA8	Q9JMA8	Extl3	ENSRNOG00000013581		-0.537864	-0.146478	0.0350608	0.556103	0.0203421	-0.538346	-0.502526	NaN	-0.342171	0.330733	0.0350608	0.36681	-0.520436	0.0218997	0.508031	-0.520436	1	-0.342171	0.749322	0.203835	52169300	0.0253286	0.276752	0.305162	7	7	7	12.3	12.3	12.3	104.44	0	10.587	286610000	126790000	159820000	0	3	0	2	0	2	0	0	2
Q5U317	Q5U317;A0A0G2K376	Fip1l1	ENSRNOG00000002275	Pre-mRNA 3'-end-processing factor FIP1	1.18572	1.3209	0.131158	0.333775	-0.0908381	0.984034	1.37612	0.835908	1.25331	0.0342998	0.131158	0.416174	0.984034	0.0221267	0.508031	1.06535	1	1.25331	0.782296	0.124699	35976800	0.279135	0.0955887	0.212381	13	13	13	43.8	43.8	43.8	60.187	0	163.91	9100400000	3582800000	5517600000	5	7	2	8	6	6	7	5	4
Q63945-2	Q63945-2;P80349	Set		Fuctinin-3;Protein SET	-0.778729	NaN	NaN	NaN	0.361207	-0.284502	-0.318979	-0.459834	-0.778729	1	0.361207	1	-0.318979	0.0221368	0.508031	-0.354438	1	-0.778729	1	0.361207	NaN	0.0928888	NaN	NaN	10	1	1	53.8	11.9	11.9	32.105	0	5.9314	561290000	257480000	303810000	8	7	8	6	5	7	5	6	5
D4A5B3	D4A5B3;A0A0G2K543	C2cd5	ENSRNOG00000014382		0.883402	-0.963813	NaN	NaN	NaN	0.489822	0.291604	0.363564	-0.0402055	0.972305	NaN	1	0.363564	0.0222727	0.508031	0.381663	1	-0.0402055	1	NaN	241451000	0.100341	1.30618	NaN	5	5	5	5.8	5.8	5.8	113.68	0.00022306	5.036	230660000	95560000	135100000	1	1	0	1	1	1	0	1	0
Q66HA6	Q66HA6	Arl8b	ENSRNOG00000007312	ADP-ribosylation factor-like protein 8B	-0.289294	-0.997432	0.104074	-0.0167566	-0.461304	-0.474428	-0.381382	-0.274657	-0.643363	0.320286	-0.0167566	0.543695	-0.381382	0.0226635	0.508031	-0.376822	1	-0.643363	0.870934	-0.124662	217450000	0.0999635	0.500729	0.297734	8	8	4	48.9	48.9	17.2	21.539	0	39.051	7378300000	4066600000	3311700000	7	6	5	5	4	5	3	4	4
D4ACM9	D4ACM9	Mfap1a	ENSRNOG00000015984		1.06814	1.01636	0.127548	-0.188494	-0.154788	0.837515	0.613618	1.05787	1.04225	0.0158112	-0.154788	0.547474	0.837515	0.0227159	0.508031	0.836334	1	1.04225	0.873178	-0.071911	119969000	0.222128	0.0366152	0.173557	9	9	9	27.8	27.8	27.8	51.968	0	63.483	5262400000	3232600000	2029800000	3	4	6	5	5	6	6	7	5
A0A0G2JWN9	A0A0G2JWN9;E9PTN1	Brd8	ENSRNOG00000020340		0.583423	NaN	NaN	NaN	-0.618429	0.853309	1.41673	1.42508	0.583423	1	-0.618429	1	1.41673	0.0227952	0.508031	1.23171	1	0.583423	1	-0.618429	27112300	0.32773	NaN	NaN	3	3	3	5.2	5.2	5.2	102.59	0	9.4356	129780000	43745000	86039000	2	1	1	0	1	0	2	0	0
D3ZK47	D3ZK47;A0A0G2K001	Whsc1l1	ENSRNOG00000015621	Histone-lysine N-methyltransferase	0.542865	NaN	0.191184	NaN	-0.317539	0.304277	0.32698	0.486188	0.542865	1	-0.0631777	0.845014	0.32698	0.0228021	0.508031	0.372482	1	0.542865	1	-0.0631777	70791600	0.0991244	NaN	0.359721	5	5	5	6.8	6.8	6.8	155.57	0	10.254	290910000	105970000	184930000	1	3	2	2	1	3	1	2	0
Q5PQR0	Q5PQR0;E9PTI6	Raly	ENSRNOG00000017405		0.240364	0.444069	0.0505492	-0.441115	-0.583117	0.207465	0.184026	0.300158	0.342216	0.18416	-0.441115	0.232985	0.207465	0.0228435	0.508031	0.230549	1	0.342216	0.668431	-0.324561	156695000	0.0614112	0.144041	0.332524	11	11	11	39.3	39.3	39.3	31.049	0	201.95	90758000000	41920000000	48838000000	5	8	8	9	9	7	9	9	9
Q2I0Y6	Q2I0Y6;Q9QYU7;A0A0G2JTL8;M0R523	Nsa2	ENSRNOG00000016530;ENSRNOG00000031935	Ribosome biogenesis protein NSA2 homolog	0.295435	0.777481	-0.281777	-0.542242	-0.549849	0.372563	0.500299	0.641766	0.536458	0.268819	-0.542242	0.035086	0.500299	0.0229014	0.508031	0.504876	1	0.536458	0.609869	-0.457956	58906500	0.13466	0.340858	0.152623	8	8	8	33.5	33.5	33.5	30.036	0	45.702	13671000000	6408800000	7261900000	4	7	6	6	5	6	6	6	5
D3ZC87	D3ZC87	Maff	ENSRNOG00000012886		1.56937	3.59892	0.312494	-0.0943059	-0.326539	1.74377	1.41599	2.38996	2.58415	0.238217	-0.0943059	0.864511	1.74377	0.0230974	0.508031	1.84991	1	2.58415	1	-0.0361169	120574000	0.495586	1.43511	0.323466	4	3	3	33.3	28.8	28.8	17.041	0.00064907	4.2983	944930000	352350000	592580000	2	2	2	2	2	2	2	1	2
Q5FVC4	Q5FVC4	Dnajb12	ENSRNOG00000030408		-0.209408	-0.784284	NaN	NaN	NaN	-0.426842	-0.436289	-0.257821	-0.496846	0.333894	NaN	1	-0.426842	0.0232413	0.508031	-0.373651	1	-0.496846	1	NaN	31249100	0.100423	0.406499	NaN	6	6	6	18.5	18.5	18.5	42.521	0	13.051	303520000	159290000	144230000	3	2	2	1	1	3	1	1	0
Q6GMN2	Q6GMN2;Q6GMN2-2	Baiap2		Brain-specific angiogenesis inhibitor 1-associated protein 2	0.2867	-0.031807	0.287942	0.125258	-0.074644	0.17974	0.10417	0.137682	0.127446	0.57034	0.125258	0.394388	0.137682	0.0233558	0.508031	0.140531	1	0.127446	0.770119	0.112852	NaN	0.0378653	0.225218	0.181611	25	25	25	57.6	57.6	57.6	59.182	0	249.56	44227000000	19811000000	24415000000	17	16	18	13	18	14	13	13	15
Q6PCU4	Q6PCU4;Q63190	Emd	ENSRNOG00000037241	Emerin	0.532253	0.435008	0.221619	0.0505621	-0.256514	0.391914	0.348959	0.571609	0.48363	0.063789	0.0505621	0.973609	0.391914	0.0234458	0.508031	0.437494	1	0.48363	1	0.0052223	152193000	0.118116	0.0687624	0.24227	14	14	14	72.7	72.7	72.7	29.585	0	323.31	38482000000	16643000000	21839000000	9	10	11	10	10	10	9	9	8
A0A0G2K249	A0A0G2K249;Q5RKH1	Prpf4b	ENSRNOG00000016705	Serine/threonine-protein kinase PRP4 homolog	0.447686	0.345226	-0.0723313	-0.524846	-0.23823	0.658583	0.42346	0.423532	0.396456	0.0818106	-0.23823	0.169702	0.423532	0.0235243	0.508031	0.501858	1	0.396456	0.642735	-0.278469	32583600	0.135728	0.0724501	0.228925	22	22	22	24.8	24.8	24.8	103.21	0	323.31	31140000000	14638000000	16503000000	14	11	15	12	12	12	11	12	13
G3V8R7	G3V8R7	Gatad2a	ENSRNOG00000022173		2.83336	0.85682	0.204902	0.411283	-0.141541	2.25083	1.82016	1.28606	1.84509	0.313049	0.204902	0.430047	1.82016	0.0235586	0.508031	1.78568	1	1.84509	0.790078	0.158215	21093900	0.483305	1.39762	0.279353	21	21	20	47.5	47.5	45.9	67.44	0	144.72	4416400000	1662400000	2754000000	4	2	7	4	4	3	7	9	10
A0A0H2UHR5	A0A0H2UHR5;Q00972	Bckdk	ENSRNOG00000019485	[3-methyl-2-oxobutanoate dehydrogenase [lipoamide]] kinase, mitochondrial	-0.402855	-0.498299	0.521955	0.862984	-0.22183	-0.235103	-0.218302	NaN	-0.450577	0.0671761	0.521955	0.349717	-0.226702	0.0235799	0.508031	-0.226702	1	-0.450577	0.740388	0.387703	206375000	0.0118804	0.0674893	0.554728	6	6	6	22.7	22.7	22.7	46.213	0	17.205	1444200000	697180000	747060000	4	2	2	2	1	0	0	0	2
A0A0G2K4A0	A0A0G2K4A0	Rab11fip5			-0.223525	-0.51093	-0.0214735	0.15199	-0.111283	0.373215	0.375067	0.582171	-0.367228	0.237458	-0.0214735	0.941427	0.375067	0.0235882	0.508031	0.443484	1	-0.367228	1	0.00641148	NaN	0.120109	0.203226	0.133833	22	5	5	56	14.6	14.6	68.761	0	56.504	1958400000	890620000	1067700000	5	4	8	5	8	9	2	5	3
A0A0G2JXW4	A0A0G2JXW4	Hnrnpc			0.205008	0.435947	-0.0388847	-0.513358	-0.510387	0.35488	0.246061	0.213364	0.320477	0.220159	-0.510387	0.153714	0.246061	0.0239477	0.508031	0.271435	1	0.320477	0.64184	-0.35421	NaN	0.0740917	0.163298	0.273084	18	18	2	57.5	57.5	10.2	34.384	0	323.31	228470000000	108900000000	119570000000	11	13	13	12	12	12	12	13	12
D3ZJ32	D3ZJ32	Esyt2	ENSRNOG00000032391		-0.057803	-0.682764	0.421883	0.174508	-0.303418	-0.210054	-0.127564	-0.220174	-0.370283	0.446232	0.174508	0.691436	-0.210054	0.0239911	0.508031	-0.18593	1	-0.370283	0.973801	0.097658	153093000	0.0507998	0.441914	0.368707	16	16	16	28.5	28.5	28.5	93.95	0	85.556	6120700000	2878600000	3242100000	8	7	9	9	10	5	7	3	5
Q6P6T6	Q6P6T6;P24268	Ctsd	ENSRNOG00000020206	Cathepsin D;Cathepsin D 12 kDa light chain;Cathepsin D 30 kDa heavy chain;Cathepsin D 34 kDa heavy chain;Cathepsin D 9 kDa light chain	-1.09037	-1.94688	0.45251	0.364805	0.0614431	-0.605748	-0.936136	-0.59099	-1.51862	0.174983	0.364805	0.131969	-0.605748	0.0242064	0.508031	-0.710958	1	-1.51862	0.639843	0.292919	222437000	0.19515	0.605641	0.205205	13	13	13	44.5	44.5	44.5	44.622	0	151.81	27062000000	14126000000	12936000000	5	4	5	3	4	4	5	6	4
D3ZWZ6	D3ZWZ6	Igf2bp2	ENSRNOG00000025946		-0.266779	-1.15962	-0.148492	0.400198	0.680604	-0.534039	-0.305852	-0.502097	-0.713199	0.356046	0.400198	0.329999	-0.502097	0.024501	0.508031	-0.447329	1	-0.713199	0.72296	0.31077	85681600	0.12356	0.631333	0.42172	12	12	11	28.4	28.4	26.2	65.404	0	45.64	1528200000	740620000	787560000	2	2	4	2	3	5	2	1	1
M0RAS3	M0RAS3	Ccdc137	ENSRNOG00000048712		1.58817	2.10023	-0.406297	NaN	-0.676849	1.37383	1.91186	2.42768	1.8442	0.0878205	-0.541573	0.155828	1.91186	0.0245836	0.508031	1.90446	1	1.8442	0.64184	-0.541573	109224000	0.526961	0.362082	0.191309	5	5	5	22.8	22.8	22.8	32.803	0	13.039	676640000	265020000	411620000	2	1	1	1	2	1	2	2	2
B5DF29	B5DF29;A0A0G2K649;A0A0G2JUH5	Rfc5	ENSRNOG00000001134		-0.0811136	0.0124515	-0.254306	0.208594	0.0365346	0.134369	0.226375	0.157618	-0.0343311	0.596968	0.0365346	0.983988	0.157618	0.0246155	0.508031	0.172787	1	-0.0343311	1	-0.00305937	46752000	0.0478422	0.0661605	0.233976	13	13	13	48.2	48.2	48.2	38.098	0	97.475	5088300000	2337400000	2750900000	6	4	3	4	3	4	5	4	4
G3V765	G3V765	Evpl	ENSRNOG00000009343		0.347491	0.0790559	1.50315	-0.20214	-0.471247	0.39226	0.464436	0.260565	0.213274	0.35759	-0.20214	0.698361	0.39226	0.0247333	0.508031	0.37242	1	0.213274	0.979607	0.276588	104768000	0.103374	0.189813	1.07072	14	14	14	10.3	10.3	10.3	231.11	0	29.16	704660000	297040000	407620000	2	2	7	2	6	6	4	2	3
D3ZA78	D3ZA78	Tpx2	ENSRNOG00000008165		1.26082	1.87654	0.276767	0.396415	-0.323182	0.731838	0.80192	1.20263	1.56868	0.123373	0.276767	0.652523	0.80192	0.0248892	0.508031	0.912129	1	1.56868	0.94732	0.116667	154731000	0.254009	0.435384	0.38559	22	22	22	41.1	41.1	41.1	85.45	0	52.384	3935800000	1621100000	2314700000	4	4	3	4	4	5	7	5	4
F1LUM5	F1LUM5	Tubal3	ENSRNOG00000028750		-0.47291	-3.23991	NaN	0.903115	NaN	-0.482271	-0.318272	-0.29575	-1.85641	0.407728	0.903115	1	-0.318272	0.024911	0.508031	-0.365431	1	-1.85641	1	0.903115	71677800	0.101811	1.95656	NaN	4	1	1	11	4.5	4.5	42.832	0	63.822	460840000	233310000	227530000	3	2	2	3	3	2	3	3	2
B0BNJ9	B0BNJ9;M0R701;Q924P2	Tmem14c	ENSRNOG00000015437;ENSRNOG00000022144	Transmembrane protein 14C	-0.23732	-1.41688	0.00360826	0.201187	-0.00797922	-0.33485	-0.599746	-0.494158	-0.8271	0.39435	0.00360826	0.435727	-0.494158	0.0251524	0.508031	-0.476252	1	-0.8271	0.794229	0.0656054	67881700	0.133353	0.834075	0.11756	3	3	3	50	50	50	11.658	0	27.702	990840000	475380000	515460000	2	3	1	0	0	1	1	1	1
A0A0G2KAL9	A0A0G2KAL9;A0A0G2K2M2	Mff			1.29507	-0.211837	0.877765	0.827761	0.00521434	1.52655	1.18625	2.07903	0.541615	0.603219	0.827761	0.181367	1.52655	0.0255139	0.508031	1.59728	1	0.541615	0.64808	0.570247	NaN	0.450574	1.06554	0.489971	7	7	1	37.8	37.8	3.8	32.801	0	85.899	3068900000	1126400000	1942500000	4	3	1	2	2	3	4	3	1
D4A1G8	D4A1G8	Cep170b	ENSRNOG00000033688		NaN	NaN	-0.0041899	NaN	NaN	0.384934	NaN	0.417272	NaN	1	-0.0041899	1	0.401103	0.0256492	0.508031	0.401103	1	NaN	1	-0.0041899	146295000	0.0228665	NaN	NaN	2	2	2	2	2	2	171.69	0	15.879	21282000	8508900	12773000	0	1	1	0	0	0	1	0	0
A0A0G2K0J0	A0A0G2K0J0;F1LR36	Supt6h	ENSRNOG00000012240		0.180834	-0.0162586	-0.11777	-0.115045	-0.212419	0.296508	0.368966	0.204883	0.0822876	0.557084	-0.11777	0.0435154	0.296508	0.0257473	0.508031	0.290119	1	0.0822876	0.609869	-0.148411	66129700	0.0822275	0.139365	0.055449	56	56	56	45.8	45.8	45.8	198.94	0	323.31	30892000000	14271000000	16622000000	25	27	19	19	18	22	16	19	16
Q497C2	Q497C2	Rpp38	ENSRNOG00000038025		0.631491	0.484547	-0.129392	0.341872	-0.135949	0.399015	0.59643	0.357031	0.558019	0.0833414	-0.129392	0.886705	0.399015	0.0257692	0.508031	0.450825	1	0.558019	1	0.0255103	80556400	0.127833	0.103905	0.273997	9	9	9	43.4	43.4	43.4	30.087	0	40.752	1846800000	874020000	972800000	3	1	3	1	2	1	1	2	1
Q9ERU2	Q9ERU2	Znf22	ENSRNOG00000013379	Zinc finger protein 22	0.215368	0.586911	NaN	NaN	NaN	0.328951	0.418999	0.233058	0.401139	0.276103	NaN	1	0.328951	0.0259102	0.508031	0.327003	1	0.401139	1	NaN	214696000	0.0929859	0.26272	NaN	4	4	4	21.9	21.9	21.9	27.286	0	5.6144	356060000	182190000	173870000	0	1	2	0	1	0	1	2	2
Q4KLK7	Q4KLK7	Nop56	ENSRNOG00000007128		0.107069	0.321603	-0.295252	-0.664885	-0.542817	0.264332	0.160844	0.28835	0.214336	0.295403	-0.542817	0.0440199	0.264332	0.0260008	0.508031	0.237842	1	0.214336	0.609869	-0.500985	129303000	0.0677551	0.151699	0.188334	37	37	37	73.8	73.8	73.8	65.399	0	323.31	258610000000	122310000000	136300000000	26	25	28	26	28	29	29	30	29
Q566R3	Q566R3	Gpatch4	ENSRNOG00000018969	G patch domain-containing protein 4	0.416874	0.550443	-0.451537	-0.319644	-0.601413	0.693433	0.59184	0.382723	0.483658	0.0873537	-0.451537	0.0302212	0.59184	0.0260121	0.508031	0.555999	1	0.483658	0.609869	-0.457531	206818000	0.158426	0.094448	0.14098	6	6	6	21.9	21.9	21.9	46.072	0	33.435	925420000	471840000	453580000	2	3	2	2	3	1	1	0	2
F1LND7	F1LND7;P05369;A0A0G2JXT3;Q7TPK0	Fdps	ENSRNOG00000043377	Farnesyl pyrophosphate synthase	-1.5098	-2.52315	0.811476	0.914943	0.487845	-0.31563	-0.490639	-0.301728	-2.01647	0.156719	0.811476	0.0290576	-0.31563	0.0260345	0.508031	-0.369332	1	-2.01647	0.609869	0.738088	207805000	0.105284	0.716551	0.222806	15	15	15	48.4	48.4	48.4	40.803	0	323.31	33849000000	13924000000	19925000000	2	1	5	4	5	1	5	6	7
F1M3D3	F1M3D3;F1LV13;Q62826;Q62826-2;A0A0G2JVD4;A0A0G2JZ75;Q9WV78	Hnrnpm	ENSRNOG00000007921;ENSRNOG00000017676	Heterogeneous nuclear ribonucleoprotein M;Plasmalemma vesicle-associated protein	0.233	0.173253	-0.0952979	-0.504063	-0.421655	0.184153	0.219126	0.316182	0.203126	0.09296	-0.421655	0.112282	0.219126	0.026063	0.508031	0.23982	1	0.203126	0.63627	-0.340339	19230900	0.0684037	0.0422473	0.216175	39	39	39	67.5	67.5	67.5	77.629	0	323.31	376540000000	180570000000	195970000000	21	20	25	22	21	22	25	26	27
A0A0H2UI40	A0A0H2UI40;Q5M7T3	Brms1	ENSRNOG00000020117;ENSRNOG00000047683	Breast cancer metastasis-suppressor 1 homolog	-0.0967457	0.102457	-0.543993	0.203389	NaN	0.207782	0.176833	0.1145	0.00285547	0.981754	-0.170302	0.727776	0.176833	0.0261247	0.508031	0.166372	1	0.00285547	0.998835	-0.170302	227305000	0.0475124	0.140857	0.528479	3	3	3	17.1	17.1	17.1	28.336	0	9.6992	161580000	70785000	90798000	1	1	0	1	0	1	1	0	1
A0A0G2JXJ2	A0A0G2JXJ2;Q7TPK1;A0A0G2JT07;D3ZK36	Uhrf1	ENSRNOG00000011308	E3 ubiquitin-protein ligase UHRF1	0.292424	0.293428	0.458216	-0.260504	-0.607206	0.448254	0.285454	0.277628	0.292926	0.00109101	-0.260504	0.705969	0.285454	0.0261555	0.508031	0.337112	0.986091	0.292926	0.984765	-0.136498	255476000	0.0963315	0.000709943	0.543428	33	33	33	57.2	57.2	57.2	88.196	0	323.31	31186000000	14583000000	16603000000	21	22	22	21	16	19	17	17	22
Q6IMY8	Q6IMY8;A0A0G2JZ52	Hnrnpu	ENSRNOG00000033790		0.536317	0.420972	-0.020076	-0.45158	-0.473006	0.595968	0.416395	0.344282	0.478644	0.0763392	-0.45158	0.166391	0.416395	0.0263064	0.508031	0.452215	1	0.478644	0.64184	-0.314887	100671000	0.12961	0.0815613	0.255539	40	40	40	51.6	51.6	51.6	87.731	0	323.31	587570000000	273100000000	314460000000	25	30	27	24	25	28	25	24	24
D3ZF98	D3ZF98;A0A0U1RRY7	Mnt	ENSRNOG00000002894		1.53874	NaN	-0.0607099	0.596148	0.57415	1.9731	1.8143	NaN	1.53874	1	0.57415	0.22807	1.8937	0.0266756	0.508031	1.8937	1	1.53874	0.668431	0.369863	61407000	0.112283	NaN	0.373049	2	2	2	5	5	5	45.828	0	9.4027	88624000	30207000	58417000	1	1	1	2	0	1	1	0	0
F1MAQ7	F1MAQ7	Son	ENSRNOG00000002021		1.383	0.756957	-0.172347	-0.554586	-0.554915	1.33678	1.07782	0.732332	1.06998	0.181188	-0.554586	0.078641	1.07782	0.0267464	0.508031	1.04898	1	1.06998	0.61309	-0.427283	35415400	0.303256	0.442682	0.220781	49	49	7	33.1	33.1	5.7	266.12	0	323.31	57458000000	26265000000	31193000000	20	23	23	24	25	24	29	30	27
Q5XIP9	Q5XIP9	Tmem43	ENSRNOG00000007519	Transmembrane protein 43	-0.28496	-0.409474	0.0510892	-0.399217	-0.278986	-0.202843	-0.265622	-0.146754	-0.347217	0.112947	-0.278986	0.260658	-0.202843	0.0269019	0.508031	-0.205073	1	-0.347217	0.68042	-0.209038	187412000	0.0594652	0.0880444	0.23316	18	18	18	52.5	52.5	52.5	44.774	0	323.31	48347000000	23702000000	24644000000	11	11	9	11	12	11	9	13	9
Q7TPJ6	Q7TPJ6;P83871	Phf5a	ENSRNOG00000024170	PHD finger-like domain-containing protein 5A	0.100396	0.226484	-0.118459	-0.373432	-0.222647	0.280215	0.164269	0.188355	0.16344	0.234367	-0.222647	0.0845028	0.188355	0.0269158	0.508031	0.210946	1	0.16344	0.61309	-0.238179	123071000	0.0611849	0.0891571	0.128194	6	6	6	58.8	58.8	58.8	11.488	0	175.79	10005000000	4706800000	5298700000	4	4	4	3	4	5	5	3	4
Q765A7	Q765A7	Pgap1	ENSRNOG00000013388	GPI inositol-deacylase	-0.180754	0.569686	0.434574	0.191317	-0.363374	-0.298611	-0.325036	NaN	0.194466	0.695596	0.191317	0.74651	-0.311823	0.0269587	0.508031	-0.311823	1	0.194466	1	0.0875057	60749700	0.0186854	0.530641	0.408978	7	7	7	10	10	10	104.38	0	13.763	773980000	350740000	423230000	2	4	1	2	3	1	0	0	1
D3ZBL6	D3ZBL6	Nup160	ENSRNOG00000028215		0.198927	-0.0859134	-0.0431489	-0.319804	-0.364389	0.119791	0.192037	0.119606	0.0565066	0.759542	-0.319804	0.137258	0.119791	0.0269811	0.508031	0.143811	1	0.0565066	0.641577	-0.242447	86204600	0.041765	0.201412	0.174031	34	34	34	40.8	40.8	40.8	137.86	0	323.31	17491000000	8509100000	8981600000	15	14	12	11	9	14	9	16	7
A0A0H2UHS3	A0A0H2UHS3;Q5PPN7;A0A0G2JXH2	Ccdc51	ENSRNOG00000020688	Coiled-coil domain-containing protein 51	-0.0950756	-0.920134	-0.20317	NaN	NaN	-0.273483	-0.191621	-0.349533	-0.507605	0.434452	-0.20317	1	-0.273483	0.0270554	0.508031	-0.271546	1	-0.507605	1	-0.20317	117172000	0.0789742	0.583404	NaN	6	6	6	20.1	20.1	20.1	42.308	0	26.281	1410000000	734230000	675770000	3	2	3	3	5	3	3	3	2
B5DEY5	B5DEY5	Thoc3	ENSRNOG00000000104		0.161352	0.417626	0.0124164	0.582956	-0.486896	0.547663	0.298625	0.44159	0.289489	0.265286	0.0124164	0.917555	0.44159	0.0271059	0.508031	0.429293	1	0.289489	1	0.0361587	12803800	0.124973	0.181214	0.535321	8	8	8	38.5	38.5	38.5	38.795	0	71.245	2522100000	1296000000	1226100000	3	2	2	2	2	3	2	1	2
A0A0G2JVM2	A0A0G2JVM2;A0A0G2K0A8	Mia3			-0.0186462	-0.162685	0.432669	0.38597	0.567302	-0.313292	-0.300085	-0.174573	-0.0906656	0.427351	0.432669	0.013564	-0.300085	0.0271746	0.508031	-0.26265	1	-0.0906656	0.609869	0.46198	NaN	0.0765621	0.101851	0.0941525	15	15	15	15.7	15.7	15.7	153.47	0	38.21	1896700000	693830000	1202800000	2	2	4	3	3	2	5	2	3
Q5U3Z5	Q5U3Z5	Bri3bp	ENSRNOG00000000979		-0.244521	-0.36965	-0.00514243	0.0183459	-0.179798	-0.15285	-0.146818	-0.0851624	-0.307086	0.127951	-0.00514243	0.468026	-0.146818	0.0272685	0.508031	-0.128277	1	-0.307086	0.817104	-0.0555315	38445400	0.0374598	0.088479	0.108257	5	5	5	19.8	19.8	19.8	28.316	0	227.22	7113200000	3506300000	3606900000	1	2	2	1	1	1	2	2	2
Q63624	Q63624	Scaf1	ENSRNOG00000020499	Splicing factor, arginine/serine-rich 19	0.974194	2.72591	0.175448	0.455061	-0.204633	1.44986	0.845119	0.973682	1.85005	0.281489	0.175448	0.535113	0.973682	0.0273364	0.508031	1.08955	1	1.85005	0.864426	0.141958	102063000	0.318588	1.23865	0.331119	8	8	8	7.7	7.7	7.7	133.85	0	39.88	1445300000	561630000	883670000	1	3	2	2	4	4	2	5	2
G3V662	G3V662;P49791	Nup153	ENSRNOG00000001456	Nuclear pore complex protein Nup153	1.65813	0.81545	0.082576	0.0556491	-0.197869	1.14844	1.52842	0.843396	1.23679	0.209029	0.0556491	0.844545	1.14844	0.0273497	0.508031	1.17342	1	1.23679	1	-0.0198811	19523800	0.343197	0.595867	0.154728	43	43	43	45.2	45.2	45.2	152.83	0	323.31	30017000000	12736000000	17281000000	21	18	18	13	17	19	13	20	13
Q5XIB5	Q5XIB5	Ccdc86	ENSRNOG00000020925	Coiled-coil domain-containing protein 86	0.881281	1.36247	-0.181904	-0.240785	-0.517026	1.38495	1.02927	1.86359	1.12188	0.134491	-0.240785	0.0937206	1.38495	0.0275534	0.508031	1.42594	1	1.12188	0.616465	-0.313238	234062000	0.418668	0.340254	0.178924	9	9	9	33.7	33.7	33.7	38.584	0	42.099	4065800000	1937300000	2128500000	1	3	4	2	2	3	1	2	1
Q4AEF8	Q4AEF8;A0A0G2K1F3	Copg1	ENSRNOG00000010474	Coatomer subunit gamma-1	0.0816751	-0.356228	-0.331885	0.292549	0.252836	0.0356259	0.0540593	0.0659417	-0.137276	0.643483	0.252836	0.758099	0.0540593	0.027707	0.508031	0.0518757	1	-0.137276	1	0.0711671	185063000	0.0152754	0.309644	0.349617	31	29	29	57.6	54.2	54.2	97.613	0	144.48	5935100000	2947700000	2987300000	14	10	12	9	11	11	3	8	8
D4AEI5	D4AEI5;A0A0G2K402	Myef2	ENSRNOG00000005258		0.575876	0.608929	0.0596289	-0.431809	-0.347421	0.526458	0.50413	0.290963	0.592403	0.0177554	-0.347421	0.254669	0.50413	0.0278227	0.508031	0.440517	1	0.592403	0.674455	-0.239867	123877000	0.129998	0.0233719	0.262781	18	18	18	47.5	47.5	47.5	63.349	0	323.31	20529000000	9371600000	11157000000	4	6	9	10	8	8	8	7	9
P15429	P15429	Eno3	ENSRNOG00000004078	Beta-enolase	-1.3449	-0.685014	0.225683	0.433905	0.214921	-0.59231	NaN	-0.542357	-1.01496	0.200094	0.225683	0.0548976	-0.567333	0.0280089	0.508031	-0.567333	1	-1.01496	0.609869	0.291503	57023900	0.0353224	0.466613	0.123441	12	8	6	44.5	28.6	23.7	47.013	0	27.548	3048200000	1322600000	1725500000	4	2	2	2	3	4	3	4	5
A0A0G2JSJ1	A0A0G2JSJ1;Q6P9Z6	Tacstd2		Tumor-associated calcium signal transducer 2	-0.560969	-0.230948	0.303771	-0.160469	-0.362644	-0.246879	-0.136724	-0.178861	-0.395958	0.25137	-0.160469	0.746492	-0.178861	0.0280678	0.508031	-0.187488	1	-0.395958	1	-0.0731137	NaN	0.0555819	0.23336	0.341688	11	11	11	33.4	33.4	33.4	35.5	0	323.31	25829000000	12688000000	13141000000	7	8	7	8	6	8	6	5	5
Q9JJ46	Q9JJ46	Ebp	ENSRNOG00000004903	3-beta-hydroxysteroid-Delta(8),Delta(7)-isomerase	-0.650604	-0.142878	-0.42167	0.236952	-0.384059	-0.324879	-0.352694	-0.547009	-0.396741	0.362378	-0.384059	0.468307	-0.352694	0.0280713	0.508031	-0.408194	1	-0.396741	0.817104	-0.189592	15832800	0.121019	0.359016	0.369877	3	3	3	15.2	15.2	15.2	26.737	0	41.744	1688500000	890550000	797970000	1	1	1	1	1	3	2	2	3
Q68FY1	Q68FY1	Nup35	ENSRNOG00000009290	Nucleoporin NUP53	1.00166	0.538023	0.0201474	-0.281102	-0.325936	0.985023	1.06249	0.578091	0.769841	0.186204	-0.281102	0.213608	0.985023	0.0282229	0.508031	0.875203	1	0.769841	0.666864	-0.19563	74426900	0.260206	0.32784	0.188209	10	10	10	52.9	52.9	52.9	34.801	0	222.62	7986800000	3527900000	4459000000	8	7	6	6	5	4	5	6	5
Q6IMZ3	Q6IMZ3;P48037	Anxa6		Annexin;Annexin A6	-0.382693	1.57129	0.162803	0.594549	NaN	-0.538283	-0.588692	NaN	0.594298	0.65209	0.378676	0.329848	-0.563487	0.0284566	0.508031	-0.563487	1	0.594298	0.72296	0.378676	NaN	0.0356444	1.38167	0.305291	16	16	16	28.8	28.8	28.8	75.755	0	29.465	1326300000	692060000	634220000	0	1	2	2	2	1	0	0	0
P54921	P54921;F8WFM2;P85969	Napa	ENSRNOG00000001494;ENSRNOG00000004753	Alpha-soluble NSF attachment protein;Beta-soluble NSF attachment protein	-0.604519	-0.859723	0.381917	0.541286	0.198725	-0.231736	-0.409552	-0.28098	-0.732121	0.109853	0.381917	0.0634418	-0.28098	0.0284661	0.508031	-0.307423	1	-0.732121	0.609869	0.373976	114346000	0.0918099	0.180456	0.171418	17	17	17	73.9	73.9	73.9	33.192	0	323.31	29072000000	13675000000	15397000000	13	10	12	14	10	15	7	10	4
D3ZQK5	D3ZQK5	RGD1561149	ENSRNOG00000008113		1.91408	2.16091	0.0716446	0.557502	-0.0535343	1.92725	1.14814	2.13213	2.03749	0.038514	0.0716446	0.41142	1.92725	0.0285472	0.508031	1.73584	1	2.03749	0.778654	0.191871	151141000	0.519169	0.174534	0.322773	17	17	17	24.1	24.1	24.1	105.22	0	63.798	3062300000	1438400000	1623900000	1	3	2	5	3	3	5	6	2
Q63014	Q63014	Akap8	ENSRNOG00000006559	A-kinase anchor protein 8	0.103605	0.56398	0.0866634	-0.138269	-0.196919	0.605502	0.408218	0.345714	0.333792	0.384341	-0.138269	0.438952	0.408218	0.0285738	0.508031	0.453145	1	0.333792	0.797486	-0.0828415	14477700	0.135596	0.325534	0.149696	22	22	22	62	62	62	76.161	0	242.6	22746000000	10392000000	12354000000	7	9	7	7	7	8	7	5	8
Q64232	Q64232	Tecr	ENSRNOG00000021808	Very-long-chain enoyl-CoA reductase	-0.19233	-0.463031	0.716282	0.369206	-0.0288902	-0.184592	-0.107176	-0.121226	-0.32768	0.249371	0.369206	0.243475	-0.121226	0.0286391	0.508031	-0.137665	1	-0.32768	0.669577	0.352199	35684500	0.041243	0.191415	0.372877	13	13	13	31.8	31.8	31.8	36.122	0	211.01	39800000000	16916000000	22884000000	6	7	7	7	7	6	6	6	4
B1WBQ7	B1WBQ7;P54275	Msh2	ENSRNOG00000015796	DNA mismatch repair protein Msh2	-0.149537	-1.38794	-0.342836	-0.555206	0.725932	0.469713	NaN	0.428786	-0.768738	0.431674	-0.342836	0.898199	0.449249	0.0289785	0.508031	0.449249	1	-0.768738	1	-0.0573699	21198400	0.02894	0.875683	0.686619	12	12	12	17.8	17.8	17.8	104.15	0	22.578	1116700000	528720000	587950000	1	1	0	0	2	1	0	3	1
M0RDX9	M0RDX9;D4A6L3;A0A1W2Q629	Nol8	ENSRNOG00000045569;ENSRNOG00000046968	Nucleolar protein 8	1.25961	0.841322	0.0291172	-0.188889	-0.286139	0.965105	1.51435	0.894745	1.05047	0.125114	-0.188889	0.251818	0.965105	0.0290127	0.508031	1.12473	1	1.05047	0.672969	-0.148637	17041200	0.339248	0.295778	0.161437	17	17	17	20.6	20.6	20.6	129.89	0	37.342	3101400000	1656400000	1445100000	5	5	2	3	3	5	5	2	5
Q6P7S1	Q6P7S1;A0A0G2K8T0	Asah1	ENSRNOG00000010034	Acid ceramidase	-0.437146	-0.710455	0.118849	0.130738	-0.105784	-0.443135	-0.243343	-0.316941	-0.573801	0.148842	0.118849	0.596834	-0.316941	0.0290994	0.508031	-0.334473	1	-0.573801	0.910593	0.0479342	53712300	0.101043	0.193258	0.133257	15	15	15	50	50	50	44.443	0	209.64	21091000000	9926500000	11165000000	7	6	8	7	5	9	5	8	5
Q5I0I8	Q5I0I8	Noc4l	ENSRNOG00000037478	Nucleolar complex protein 4 homolog	0.38986	0.260376	-0.302835	-0.626426	-0.411053	0.264359	0.140391	0.228422	0.325118	0.125135	-0.411053	0.0424495	0.228422	0.0291191	0.508031	0.211058	1	0.325118	0.609869	-0.446771	53810400	0.0637822	0.0915585	0.164726	19	19	19	59.7	59.7	59.7	58.862	0	150.37	16677000000	8295200000	8381900000	11	12	8	6	8	5	4	5	6
Q9R0T3	Q9R0T3;A0A1W2Q6P6	Dnajc3	ENSRNOG00000010352	DnaJ homolog subfamily C member 3	0.179108	-0.0826751	-0.00105352	0.330538	-0.0898544	-0.269618	-0.143935	-0.245175	0.0482166	0.775308	-0.00105352	0.596099	-0.245175	0.0293551	0.508031	-0.219576	1	0.0482166	0.910571	0.0798766	107610000	0.066637	0.185109	0.221573	11	11	11	32.3	32.3	32.3	57.56	0	86.294	2736600000	1289000000	1447600000	2	3	2	2	1	3	2	3	2
F1M1R4	F1M1R4	Rbm27	ENSRNOG00000027250		0.756246	2.22702	0.173694	0.0388712	-0.0193986	0.325126	0.615455	0.517948	1.49163	0.291596	0.0388712	0.377111	0.517948	0.0294328	0.508031	0.486176	1	1.49163	0.760802	0.0643888	36273400	0.147749	1.03999	0.099043	15	13	13	17.6	16.4	16.4	118.68	0	40.195	2850900000	1197600000	1653300000	4	6	4	4	3	4	2	3	3
Q6AYK5	Q6AYK5;A0A0G2K5W6	Lyar	ENSRNOG00000005374	Cell growth-regulating nucleolar protein	0.196588	0.265347	-0.0724257	-0.488685	-0.628287	0.185979	0.339842	0.242363	0.230968	0.0940699	-0.488685	0.140822	0.242363	0.02945	0.508031	0.256061	1	0.230968	0.641577	-0.396466	77290100	0.077841	0.0486199	0.289178	17	17	17	42.2	42.2	42.2	43.68	0	323.31	27850000000	13668000000	14183000000	9	10	8	11	9	8	9	8	10
Q4QQU5	Q4QQU5	Yipf6	ENSRNOG00000006642	Protein YIPF6	-0.242431	-0.294641	0.446588	0.257404	-0.167299	-0.394159	-0.296106	-0.544652	-0.268536	0.0616936	0.257404	0.428227	-0.394159	0.0294755	0.508031	-0.411639	1	-0.268536	0.789583	0.178898	69501000	0.125192	0.0369181	0.314383	1	1	1	5.9	5.9	5.9	26.106	0	22.523	616070000	315830000	300230000	1	1	1	1	1	0	1	1	1
D3ZMX6	D3ZMX6;D3ZWC6	Sntb2	ENSRNOG00000004821;ENSRNOG00000020344		0.359716	-0.342616	0.185155	-0.12407	-0.241149	0.266051	0.148703	0.181611	0.00854997	0.984503	-0.12407	0.68341	0.181611	0.0295431	0.508031	0.198788	1	0.00854997	0.969162	-0.0600211	73005200	0.0605302	0.496624	0.220251	11	11	11	25.1	25.1	25.1	56.525	0	25.697	2019000000	870380000	1148600000	4	4	2	3	4	3	1	4	0
G3V9R0	G3V9R0	Luc7l	ENSRNOG00000020488		-0.295664	-0.656597	-0.0281103	0.458337	0.631392	-0.197633	-0.302243	-0.37408	-0.476131	0.230645	0.458337	0.214919	-0.302243	0.0295585	0.508031	-0.291319	1	-0.476131	0.667493	0.353873	15435900	0.0887294	0.255218	0.341936	9	5	5	27.8	17.3	17.3	44.049	0	103.43	3815600000	1623200000	2192400000	3	4	3	2	4	4	2	3	3
Q5XI28	Q5XI28	Raver1	ENSRNOG00000020710	Ribonucleoprotein PTB-binding 1	0.705371	0.130791	-0.0071724	-0.291359	-0.243665	1.1739	0.958714	0.619438	0.418081	0.383283	-0.243665	0.175973	0.958714	0.0295847	0.508031	0.91735	1	0.418081	0.645792	-0.180732	22148800	0.279535	0.40629	0.152187	24	24	24	57.6	57.6	57.6	79.288	0	323.31	27372000000	12100000000	15272000000	12	14	9	8	10	8	9	12	9
D4AE06	D4AE06;D4A6E5	Fkbp15	ENSRNOG00000024663	Peptidyl-prolyl cis-trans isomerase	1.08393	0.78927	NaN	-0.235212	0.168257	NaN	0.811964	0.891886	0.936599	0.0993277	-0.0334776	0.895308	0.851925	0.0298397	0.508031	0.851925	1	0.936599	1	-0.0334776	82255200	0.0565131	0.208355	0.285296	9	9	9	13.6	13.6	13.6	131.17	0	15.501	156960000	63666000	93298000	0	0	2	0	0	1	0	1	0
A0A0G2K3U1	A0A0G2K3U1;Q02356	Ampd2	ENSRNOG00000019240	AMP deaminase 2	NaN	-0.411023	-0.297082	NaN	0.889869	-0.287131	-0.261396	NaN	-0.411023	1	0.296394	0.705128	-0.274264	0.029846	0.508031	-0.274264	1	-0.411023	0.984636	0.296394	230330000	0.0181973	NaN	0.839301	11	11	11	14.5	14.5	14.5	92.084	0	18.603	722110000	338960000	383150000	1	0	2	0	0	0	1	0	1
P07154	P07154	Ctsl	ENSRNOG00000018566	Cathepsin L1;Cathepsin L1 heavy chain;Cathepsin L1 light chain;Procathepsin L	-0.577562	-0.439312	0.142793	0.0827919	0.192777	-0.425786	-0.782936	-0.776177	-0.508437	0.0860246	0.142793	0.0482476	-0.776177	0.0303366	0.508031	-0.661633	1	-0.508437	0.609869	0.139454	1861400	0.204278	0.0977573	0.0550684	10	10	10	50.6	50.6	50.6	37.66	0	130.21	12277000000	5747900000	6528900000	3	4	5	6	3	5	6	6	5
Q6IN22	Q6IN22;P00787	Ctsb	ENSRNOG00000010331	Cathepsin B;Cathepsin B heavy chain;Cathepsin B light chain	-1.29564	-1.70229	0.199567	0.396101	0.0483367	-0.510557	-0.812833	-0.977972	-1.49896	0.0858307	0.199567	0.166632	-0.812833	0.030383	0.508031	-0.767121	1	-1.49896	0.64184	0.214668	50081500	0.237037	0.287549	0.174373	16	16	16	56	56	56	37.544	0	323.31	55166000000	27205000000	27962000000	7	8	8	9	8	9	8	8	7
P38983	P38983	Rpsa	ENSRNOG00000018645	40S ribosomal protein SA	-0.408401	-2.70164	-0.27757	0.341093	0.499263	-0.244719	-0.374938	-0.212643	-1.55502	0.404487	0.341093	0.511628	-0.244719	0.0305356	0.508031	-0.277433	1	-1.55502	0.848127	0.187595	128007000	0.0859507	1.62157	0.410534	17	17	17	63.4	63.4	63.4	32.824	0	323.31	160540000000	83111000000	77430000000	14	12	13	13	11	11	9	9	10
Q5RKH2	Q5RKH2	Galk1	ENSRNOG00000006359		-0.671189	-1.15978	-0.47756	0.448622	0.211309	NaN	-0.843516	-0.765992	-0.915486	0.166013	0.211309	0.847062	-0.804754	0.03064	0.508031	-0.804754	1	-0.915486	1	0.0607902	103721000	0.0548178	0.345488	0.481087	14	14	14	45.7	45.7	45.7	42.376	0	90.173	3712300000	2077100000	1635200000	0	0	2	2	3	2	3	2	2
A0A0G2JUA5	A0A0G2JUA5;A0A0G2JU96	Ahnak			1.40669	1.43602	0.109874	0.498388	0.13152	0.939746	0.808712	1.43549	1.42135	0.00656846	0.13152	0.189585	0.939746	0.0308549	0.508031	1.06132	1	1.42135	0.650274	0.246594	NaN	0.330599	0.0207403	0.218329	209	209	209	75.8	75.8	75.8	581.12	0	323.31	1312100000000	487340000000	824770000000	127	131	134	135	145	141	137	148	137
Q496Z0	Q496Z0	Elp2	ENSRNOG00000015301	Elongator complex protein 2	0.480885	-0.870767	-0.514202	-2.04934	0.423623	-0.47511	-0.523566	NaN	-0.194941	0.821221	-0.514202	0.426667	-0.499338	0.0308651	0.508031	-0.499338	1	-0.194941	0.789456	-0.713307	16303500	0.0342639	0.955763	1.24845	15	15	15	29.5	29.5	29.5	91.745	0	67.793	1543600000	775140000	768460000	1	1	1	0	2	0	1	0	1
A0A140UHX1	A0A140UHX1	Lrwd1			0.501311	0.272633	0.128777	-0.319456	-0.615623	0.777824	0.508312	0.438092	0.386972	0.182899	-0.319456	0.340089	0.508312	0.0309576	0.508031	0.574743	1	0.386972	0.731038	-0.268767	NaN	0.179344	0.1617	0.374779	15	15	15	40.3	40.3	40.3	71.299	0	98.301	3998200000	1768000000	2230100000	7	6	5	6	6	5	2	4	4
P53565	P53565	Cux1	ENSRNOG00000001424	Homeobox protein cut-like 1	0.278778	0.835275	0.581178	0.14851	-0.401427	1.22405	0.75344	0.722712	0.557026	0.294925	0.14851	0.737424	0.75344	0.0309861	0.508031	0.900066	1	0.557026	1	0.109421	25151500	0.280995	0.393503	0.492468	19	19	18	19.5	19.5	18.6	164.54	0	156.93	1168900000	461510000	707390000	7	5	4	6	4	5	4	7	5
Q499N5	Q499N5	Acsf2	ENSRNOG00000003330	Acyl-CoA synthetase family member 2, mitochondrial	-0.0998964	NaN	NaN	NaN	NaN	-0.131692	-0.11944	NaN	-0.0998964	1	NaN	1	-0.125566	0.0310342	0.508031	-0.125566	1	-0.0998964	1	NaN	82104300	0.00866349	NaN	NaN	2	2	2	4.1	4.1	4.1	67.886	0.00106	3.8876	80968000	42517000	38452000	0	2	1	1	2	0	0	0	0
P18418	P18418;F1M5A1;D3ZYM6	Calr	ENSRNOG00000003029;ENSRNOG00000037710	Calreticulin	-0.288226	-0.692275	0.109229	0.443263	-0.0804847	-0.149941	-0.285213	-0.214365	-0.49025	0.248842	0.109229	0.412133	-0.214365	0.0310468	0.508031	-0.216506	1	-0.49025	0.778654	0.157336	84818400	0.0676612	0.285706	0.265167	19	19	19	66.8	66.8	66.8	47.995	0	323.31	181520000000	87451000000	94067000000	13	11	10	12	11	11	11	12	13
P63012	P63012	Rab3a	ENSRNOG00000019433	Ras-related protein Rab-3A	-0.521013	NaN	0.396927	NaN	0.223243	-0.544816	-0.494	NaN	-0.521013	1	0.310085	0.173837	-0.519408	0.0311165	0.508031	-0.519408	1	-0.521013	0.645565	0.310085	20292200	0.035932	NaN	0.122813	6	4	3	35	22.7	17.7	24.97	0	5.709	879890000	350960000	528940000	2	4	1	2	2	2	2	2	2
D3ZZQ5	D3ZZQ5	Naa40	ENSRNOG00000021179		-0.412292	NaN	0.994869	1.13711	-0.0413036	-0.302689	-0.524147	-0.580774	-0.412292	1	0.994869	0.201396	-0.524147	0.0311789	0.508031	-0.469203	1	-0.412292	0.656891	0.696892	229468000	0.146959	NaN	0.64324	2	2	2	12.2	12.2	12.2	27.242	0.00064879	4.293	257300000	117710000	139590000	1	1	0	1	2	1	1	1	0
G3V920	G3V920	Wdr43	ENSRNOG00000026316		0.2104	0.331239	-0.287854	-0.594602	-0.483705	0.378325	0.204924	0.261952	0.27082	0.13974	-0.483705	0.0366589	0.261952	0.0312698	0.508031	0.281734	1	0.27082	0.609869	-0.455387	33299500	0.0883766	0.0854459	0.155322	23	23	23	51.2	51.2	51.2	74.805	0	323.31	60559000000	28587000000	31972000000	17	18	16	15	15	16	15	11	12
A0A0H2UHJ5	A0A0H2UHJ5;Q562A2;B1WC00	Zfr	ENSRNOG00000011627	Zinc finger RNA-binding protein	0.590252	0.370341	-0.11079	-0.445881	-0.498549	0.350294	0.353313	0.18967	0.480297	0.143274	-0.445881	0.101381	0.350294	0.0314083	0.508031	0.297759	1	0.480297	0.627753	-0.35174	82476900	0.0936202	0.1555	0.210324	25	25	25	40	40	40	116.91	0	323.31	17306000000	8978100000	8327900000	11	13	11	13	9	13	14	13	15
D4A305	D4A305	Ccdc58	ENSRNOG00000031653		-0.352231	-0.29357	0.0881604	0.0785977	0.0842919	-0.225088	-0.14027	-0.130582	-0.322901	0.0576686	0.0842919	0.0010996	-0.14027	0.0314257	0.508031	-0.165313	1	-0.322901	0.609869	0.0836833	70685900	0.0519923	0.0414795	0.00481034	7	7	7	60.4	60.4	60.4	16.69	0	107.56	9523900000	4332900000	5191000000	2	3	2	3	3	2	5	4	2
B5DEH2	B5DEH2	Erlin2	ENSRNOG00000013763	Erlin-2	-0.0481228	-0.584424	-0.169551	-0.167548	-0.200765	-0.184601	-0.110803	-0.214927	-0.316273	0.447697	-0.169551	0.00357836	-0.184601	0.031484	0.508031	-0.17011	1	-0.316273	0.609869	-0.179288	68853300	0.053553	0.379222	0.0186261	14	14	12	54.9	54.9	47.8	37.71	0	108.21	14709000000	7379000000	7329700000	8	6	7	8	8	8	7	7	7
Q5VLR5	Q5VLR5	Erp44	ENSRNOG00000005841		0.0150722	-0.668914	0.137403	0.455091	-0.0176984	-0.137767	-0.07172	-0.126429	-0.326921	0.514342	0.137403	0.302395	-0.126429	0.0315979	0.508031	-0.111972	1	-0.326921	0.713227	0.191598	68454100	0.0353171	0.483652	0.241009	17	17	17	53.4	53.4	53.4	46.878	0	323.31	35657000000	16417000000	19240000000	11	11	8	10	9	7	6	6	5
A0A0H2UI05	A0A0H2UI05;Q499T7	Cfap20	ENSRNOG00000042179	Cilia- and flagella-associated protein 20	-0.8559	0.08523	-0.246164	0.335835	-0.588588	0.416396	0.506907	0.260628	-0.385335	0.563186	-0.246164	0.600477	0.416396	0.031645	0.508031	0.394643	1	-0.385335	0.913153	-0.166306	10009300	0.124572	0.665479	0.467357	8	8	8	51.3	51.3	51.3	22.748	0	41.597	2948600000	1960800000	987770000	2	2	0	3	1	2	0	2	1
Q5XIW8	Q5XIW8	Sart1	ENSRNOG00000020475	U4/U6.U5 tri-snRNP-associated protein 1	0.670823	1.48371	0.115329	0.037519	-0.232803	0.946012	0.615384	1.19525	1.07727	0.229678	0.037519	0.824145	0.946012	0.0318183	0.508031	0.918883	1	1.07727	1	-0.0266515	227692000	0.290884	0.574798	0.182722	31	31	31	46.9	46.9	46.9	91.01	0	323.31	24243000000	10149000000	14095000000	14	13	10	16	15	14	13	16	14
A0A096MK44	A0A096MK44	Bms1	ENSRNOG00000006576		1.10743	1.71924	-0.225422	-0.196268	-0.503653	0.99814	1.03952	1.7035	1.41333	0.135698	-0.225422	0.0877932	1.03952	0.0319818	0.508031	1.24705	1	1.41333	0.61309	-0.308448	216360000	0.395834	0.432616	0.16968	2	2	2	12.5	12.5	12.5	15.096	0	17.623	1645400000	798970000	846430000	1	1	1	1	1	1	1	1	1
F1M989	F1M989;B1WC15	Zcchc7	ENSRNOG00000013078	Zinc finger CCHC domain-containing protein 7	1.22661	1.12343	0.11587	-0.206692	-0.457148	0.929652	0.657457	0.49211	1.17502	0.027932	-0.206692	0.38558	0.657457	0.0322434	0.508031	0.693073	1	1.17502	0.766662	-0.182657	64759100	0.220935	0.072956	0.287264	3	3	3	7	7	7	63.258	0	30.706	4841300000	2150000000	2691300000	2	3	2	0	1	3	0	1	1
F1MAJ8	F1MAJ8	Zfp91	ENSRNOG00000012524		NaN	NaN	-0.250476	NaN	-0.339381	0.416408	0.4609	NaN	NaN	1	-0.294928	0.0952374	0.438654	0.0322583	0.508031	0.438654	1	NaN	0.619212	-0.294928	236756000	0.0314608	NaN	0.062866	1	1	1	2.1	2.1	2.1	63.193	0.00022553	5.3425	243450000	113920000	129530000	1	1	0	1	0	0	0	0	0
M0R6E6	M0R6E6	Safb2	ENSRNOG00000049511		1.49433	1.07348	-0.14991	-0.0216364	-0.385102	0.770046	1.50063	1.17203	1.2839	0.103421	-0.14991	0.223375	1.17203	0.0322585	0.508031	1.14757	1	1.2839	0.667493	-0.185549	9476270	0.365908	0.297591	0.184335	13	6	6	21.8	12	12	89.964	0	131.69	1204100000	500840000	703240000	7	8	7	8	6	7	5	5	10
D3ZKI5	D3ZKI5	Phf3	ENSRNOG00000011756		0.459506	1.03245	-0.0806559	-0.318019	-0.40571	0.427423	0.827562	0.764085	0.745979	0.233421	-0.318019	0.109927	0.764085	0.0323887	0.508031	0.673023	1	0.745979	0.631155	-0.268128	35878400	0.215051	0.405133	0.168172	26	26	26	21.9	21.9	21.9	225.31	0	129.84	4188500000	1933700000	2254800000	8	8	10	10	7	9	5	8	7
Q5FVR7	Q5FVR7;A0A096MJP3	Cpsf4	ENSRNOG00000000985	Cleavage and polyadenylation specificity factor subunit 4	0.403292	0.0999218	-0.109028	-0.460598	-0.181416	0.320022	0.176378	0.339402	0.251607	0.345381	-0.181416	0.144579	0.320022	0.0324128	0.508031	0.278601	1	0.251607	0.641577	-0.250347	13269000	0.0890559	0.214515	0.185645	11	11	11	56.8	56.8	56.8	27.419	0	50.109	2500400000	1223300000	1277100000	4	4	3	2	3	3	3	3	4
D3ZUL1	D3ZUL1	Ccdc124	ENSRNOG00000018932		0.256407	-0.668088	0.749062	1.20948	0.814335	0.307554	0.461449	0.599413	-0.205841	0.733293	0.814335	0.0233707	0.461449	0.0324955	0.508031	0.456139	1	-0.205841	0.609869	0.924294	20175000	0.146002	0.653717	0.249129	5	5	5	26.7	26.7	26.7	25.317	0	12.719	379800000	122380000	257420000	2	3	1	2	0	2	0	2	0
Q8CG45	Q8CG45;A0A0G2K3V2;A0A0A0MXY9	Akr7a2	ENSRNOG00000017780	Aflatoxin B1 aldehyde reductase member 2	-0.507894	-1.7358	-0.578395	-0.274637	0.173344	-0.240128	-0.46617	-0.429336	-1.12184	0.318784	-0.274637	0.408417	-0.429336	0.0325532	0.508031	-0.378545	1	-1.12184	0.777239	-0.226563	161500000	0.121279	0.868258	0.378168	9	9	9	34.6	34.6	34.6	40.675	0	109.13	5185700000	2769100000	2416500000	1	0	1	2	1	3	3	3	1
M0R835	M0R835	Sf3b6	ENSRNOG00000046172		0.253867	0.417461	-0.1264	-0.489612	-0.381227	0.524164	0.27304	0.380519	0.335664	0.15217	-0.381227	0.0908206	0.380519	0.0326627	0.508031	0.392574	1	0.335664	0.613493	-0.332413	39886900	0.125995	0.115678	0.186462	2	2	2	17.1	17.1	17.1	14.328	0	10.116	5666000000	2642500000	3023500000	1	1	1	1	1	1	1	2	2
F1LZB0	F1LZB0	R3hcc1	ENSRNOG00000016777		NaN	-0.435378	0.476537	NaN	0.527352	0.304863	NaN	0.275081	-0.435378	1	0.501945	0.0321972	0.289972	0.0326637	0.508031	0.289972	1	-0.435378	0.609869	0.501945	55096800	0.021059	NaN	0.0359318	8	8	8	21.4	21.4	21.4	65.507	0	14.267	551300000	203630000	347680000	2	1	0	0	0	0	1	1	0
Q6MGB6-2	Q6MGB6-2;Q6MGB6	Ring1	ENSRNOG00000000467	E3 ubiquitin-protein ligase RING1	0.672458	0.22745	0.232703	0.230276	-0.00523033	0.729947	0.380772	0.52717	0.449954	0.292362	0.230276	0.192842	0.52717	0.032705	0.508031	0.545963	1	0.449954	0.650806	0.152583	5891720	0.175344	0.314668	0.136676	6	4	4	26.8	18.8	18.8	39.377	0	29.652	127750000	53334000	74414000	3	3	3	2	4	3	3	0	3
D4A4Z0	D4A4Z0	Ccdc12	ENSRNOG00000020946		-0.10186	1.7699	0.215342	NaN	0.22698	0.969535	1.28732	1.84052	0.834019	0.536598	0.221161	0.0167463	1.28732	0.0330061	0.508031	1.36579	1	0.834019	0.609869	0.221161	118267000	0.440764	1.32353	0.00822928	5	5	5	27.1	27.1	27.1	18.99	0	17.647	1266400000	489760000	776680000	2	3	2	2	1	2	2	1	1
Q3KRC6	Q3KRC6	Lrrc8e	ENSRNOG00000028460	Volume-regulated anion channel subunit LRRC8E	-0.701389	-0.415226	0.265781	0.00102864	-0.292629	-0.253185	-0.13234	-0.179692	-0.558307	0.159714	0.00102864	0.962291	-0.179692	0.0330995	0.508031	-0.188406	1	-0.558307	1	-0.00860642	4710050	0.060892	0.202348	0.27933	17	17	17	30.3	30.3	30.3	90.444	0	105.98	5204200000	2531100000	2673100000	6	7	4	6	2	4	3	5	4
A0A0G2JZM8	A0A0G2JZM8;Q99JD4	Clasp2	ENSRNOG00000009161	CLIP-associating protein 2	0.624294	0.662561	0.312204	0.251232	0.210751	0.32947	0.283785	0.166476	0.643427	0.0189258	0.251232	0.0128044	0.283785	0.0331571	0.508031	0.25991	1	0.643427	0.609869	0.258062	121390000	0.0840788	0.0270593	0.0510702	11	11	8	9.3	9.3	6.8	164.69	0	18.533	604080000	237370000	366710000	1	2	2	2	1	2	2	4	3
Q8K3F3	Q8K3F3	Ppp1r14b	ENSRNOG00000021151	Protein phosphatase 1 regulatory subunit 14B	NaN	NaN	NaN	0.505622	0.76566	-0.674959	-0.749426	NaN	NaN	1	0.635641	0.128447	-0.712193	0.0332524	0.508031	-0.712193	1	NaN	0.638884	0.635641	229221000	0.0526564	NaN	0.183875	4	4	4	48.3	48.3	48.3	15.957	0	18.437	1103800000	538180000	565620000	0	1	0	1	0	0	0	0	0
G3V768	G3V768;Q80Z32	Orc1	ENSRNOG00000008841	Origin recognition complex subunit 1	0.721655	0.311352	0.392361	-0.451701	-0.466085	0.255039	0.441533	0.267635	0.516503	0.240696	-0.451701	0.600023	0.267635	0.0333124	0.508031	0.321402	1	0.516503	0.91281	-0.175142	132031000	0.104227	0.290128	0.491524	14	14	14	21.2	21.2	21.2	95.759	0	76.007	2180100000	981670000	1198400000	4	6	2	3	3	3	4	5	7
D3ZUD8	D3ZUD8	Tm9sf3	ENSRNOG00000013443		-0.0830826	-0.447412	0.365438	0.310521	0.00375181	-0.218329	-0.16648	-0.315697	-0.265247	0.383114	0.310521	0.181693	-0.218329	0.0333414	0.508031	-0.233502	1	-0.265247	0.64808	0.22657	267924000	0.0757565	0.25762	0.19491	15	15	15	22.2	22.2	22.2	69.968	0	57.557	8297400000	4088600000	4208800000	6	7	9	8	7	6	6	8	5
B5DF74	B5DF74;F1LWM8	Osbpl11	ENSRNOG00000001782;ENSRNOG00000011435	Oxysterol-binding protein	1.19376	0.530637	-0.523535	0.582797	0.376668	1.20838	1.03837	0.608685	0.862197	0.233715	0.376668	0.710463	1.03837	0.0333978	0.508031	0.951813	1	0.862197	0.986421	0.14531	98193600	0.309077	0.468897	0.588335	5	5	5	10.9	10.9	10.9	83.964	0	13.162	466390000	185570000	280830000	2	1	2	1	3	2	1	1	1
F1M842	F1M842	Tp53bp1	ENSRNOG00000013837		0.814891	0.609899	-0.0557502	-0.0451796	-0.534216	0.941077	0.707935	0.479803	0.712395	0.0909693	-0.0557502	0.319681	0.707935	0.0334572	0.508031	0.709605	1	0.712395	0.720403	-0.211715	119695000	0.230641	0.144951	0.279344	25	25	25	23.3	23.3	23.3	212.86	0	123.84	1996400000	852680000	1143800000	6	8	3	3	3	5	9	8	8
G3V751	G3V751	Mrgbp	ENSRNOG00000045955;ENSRNOG00000048652		0.566594	0.266876	-0.386355	NaN	-0.289281	0.548479	0.919988	0.537346	0.416735	0.219763	-0.337818	0.0908471	0.548479	0.0335922	0.508031	0.668604	1	0.416735	0.613493	-0.337818	180489000	0.217776	0.211932	0.0686421	3	3	3	27	27	27	22.436	0	12.735	194510000	81260000	113250000	1	2	0	1	1	1	1	0	0
D3ZGF1	D3ZGF1;P26051;F1LSA1;O70509;P26051-2	Cd44	ENSRNOG00000006094	CD44 antigen	-0.293075	0.174475	0.104037	-0.231798	-0.181837	-0.0771212	-0.124116	-0.0697582	-0.0592999	0.841849	-0.181837	0.427901	-0.0771212	0.0337356	0.508031	-0.0903318	1	-0.0592999	0.789583	-0.1032	99339500	0.0294887	0.330607	0.181202	8	8	8	14.9	14.9	14.9	52.853	0	207.08	44309000000	20732000000	23577000000	5	4	4	6	4	5	5	7	6
F1M3H8	F1M3H8	Hnrnpa0	ENSRNOG00000039876		0.38287	0.240985	-0.0655605	-0.56144	-0.389067	0.374128	0.237808	0.206099	0.311928	0.142367	-0.389067	0.145122	0.237808	0.0339242	0.508031	0.272678	1	0.311928	0.641577	-0.338689	9112370	0.089277	0.100328	0.251749	12	12	12	49.8	49.8	49.8	30.076	0	323.31	84225000000	40530000000	43694000000	7	7	6	7	5	8	6	7	6
A0A0G2K3M7	A0A0G2K3M7;Q4V7A6	Phf10		PHD finger protein 10	0.194579	-0.297963	-0.234498	-0.554845	-2.20045	-0.307141	-0.167685	-0.330173	-0.0516922	0.868286	-0.554845	0.24338	-0.307141	0.0339731	0.508031	-0.268333	1	-0.0516922	0.669577	-0.996597	NaN	0.0879211	0.34828	1.0548	4	4	4	14.4	14.4	14.4	46.51	0	21.545	562620000	330500000	232120000	3	1	2	0	1	1	2	2	0
Q5RJM0	Q5RJM0;A0A1B0GWS6	Nifk	ENSRNOG00000025701	MKI67 FHA domain-interacting nucleolar phosphoprotein	0.241831	0.498246	-0.284182	-0.660373	-0.563621	0.205079	0.38715	0.399314	0.370039	0.21233	-0.563621	0.0468244	0.38715	0.0342747	0.508031	0.330514	1	0.370039	0.609869	-0.502725	39397800	0.1088	0.181313	0.195349	13	13	13	58.7	58.7	58.7	31.351	0	242.51	20243000000	9953100000	10290000000	9	7	8	7	6	5	7	7	7
Q4KLL9	Q4KLL9;A0A1W2Q692	Kif18b	ENSRNOG00000021713	Kinesin-like protein KIF18B	0.65649	0.482229	NaN	-0.212692	-0.342898	0.383645	0.643137	0.771668	0.569359	0.0966734	-0.277795	0.146551	0.643137	0.0343802	0.508031	0.599483	1	0.569359	0.641577	-0.277795	90780800	0.197661	0.123221	0.0920694	12	12	11	26.8	26.8	25.4	91.194	0	48.239	1268100000	571010000	697090000	4	5	6	2	1	1	1	3	2
Q4QQV8	Q4QQV8	Chmp5	ENSRNOG00000008672	Charged multivesicular body protein 5	-0.523247	-0.424475	NaN	1.17191	0.133827	-0.884728	-0.498963	-0.540327	-0.473861	0.0661104	0.652869	0.427615	-0.540327	0.0344826	0.508031	-0.64134	1	-0.473861	0.789456	0.652869	61798600	0.211793	0.0698426	0.734037	4	4	4	36.5	36.5	36.5	24.575	0	44.926	629950000	230220000	399730000	1	1	1	1	1	1	2	1	0
B4F778	B4F778	Rfc4	ENSRNOG00000001816		0.266508	-0.0307187	0.162596	0.202019	0.0994568	0.357552	0.274717	0.178662	0.117895	0.573057	0.162596	0.0353218	0.274717	0.0346739	0.508031	0.27031	1	0.117895	0.609869	0.154691	84396700	0.0895267	0.210171	0.0517362	9	9	9	41.5	41.5	41.5	39.956	0	115.78	3007500000	1246100000	1761500000	2	4	3	2	3	5	4	5	3
D3ZHZ3	D3ZHZ3;D4A0F3;A0A0G2JZR1	Osbpl3	ENSRNOG00000010011;ENSRNOG00000010812	Oxysterol-binding protein	-0.0777523	-1.61306	0.834932	0.129944	0.384858	-0.132331	-0.238327	-0.147764	-0.845408	0.469338	0.384858	0.160723	-0.147764	0.0347085	0.508031	-0.172807	1	-0.845408	0.64184	0.449911	107326000	0.0572639	1.08563	0.356968	18	18	17	31.7	31.7	30.2	100.57	0	63.516	1642500000	686430000	956040000	3	3	2	2	4	5	2	4	2
D4A9Y0	D4A9Y0	Sdf2l1	ENSRNOG00000001859		-0.0782411	-1.4717	0.406446	0.554216	0.0437059	-0.125331	-0.104165	-0.193759	-0.774971	0.466187	0.406446	0.157981	-0.125331	0.0348167	0.508031	-0.141085	1	-0.774971	0.64184	0.334789	91174800	0.0468287	0.985326	0.26269	6	6	6	51.8	51.8	51.8	23.403	0	148.56	14498000000	6716500000	7781700000	3	3	3	3	3	3	1	3	3
B5DEG7	B5DEG7	Champ1	ENSRNOG00000000112		1.01078	1.05003	0.0548654	-0.376485	-0.454849	0.428102	0.806819	0.53134	1.03041	0.0121237	-0.376485	0.244012	0.53134	0.0349384	0.508031	0.588754	1	1.03041	0.669577	-0.258823	80403600	0.195778	0.0277543	0.274473	7	7	7	12.1	12.1	12.1	87.39	0	10.769	1440200000	664160000	776060000	2	1	3	3	2	4	3	3	2
A0A0G2JY68	A0A0G2JY68;M0RCH8	Rsl1d1l1	ENSRNOG00000048608		0.219262	0.650195	-0.120465	-0.648452	-0.55703	0.223094	0.327711	0.443657	0.434729	0.29294	-0.55703	0.113243	0.327711	0.0349988	0.508031	0.331487	1	0.434729	0.636823	-0.441982	3313220	0.11033	0.304715	0.282169	22	22	9	51.3	51.3	25.4	51.488	0	323.31	102310000000	46388000000	55918000000	19	18	18	18	17	19	16	17	16
G3V7J2	G3V7J2;Q4V8C7	Prkra	ENSRNOG00000011195	Interferon-inducible double-stranded RNA-dependent protein kinase activator A	-0.419168	-1.02111	0.133968	0.620989	0.371628	-0.350646	-0.271568	-0.174133	-0.720139	0.25202	0.371628	0.116247	-0.271568	0.035048	0.508031	-0.265449	1	-0.720139	0.638884	0.375528	70062200	0.0884156	0.425638	0.243534	9	9	9	38.7	38.7	38.7	34.385	0	148.19	5398200000	2563100000	2835100000	3	3	3	4	2	4	3	0	1
Q8K585	Q8K585;Q8K585-2;D3ZAX1	Hmga1	ENSRNOG00000000488;ENSRNOG00000026969	High mobility group protein HMG-I/HMG-Y	1.5201	1.06295	-0.621712	-0.541716	-0.126536	0.863458	1.70123	1.65296	1.29152	0.111516	-0.541716	0.107282	1.65296	0.035347	0.508031	1.40588	1	1.29152	0.631155	-0.429988	21517500	0.470374	0.323258	0.265824	6	6	6	41.1	41.1	41.1	11.706	0	88.325	7543700000	2871300000	4672400000	3	2	4	3	4	2	2	3	2
D3ZB30	D3ZB30;A0A0G2JTV1;Q6P736;Q00438-2;Q00438	Ptbp1	ENSRNOG00000010448	Polypyrimidine tract-binding protein 1	0.248168	0.167218	-0.0539501	-0.540534	-0.409252	0.322896	0.165915	0.222883	0.207693	0.122527	-0.409252	0.147944	0.222883	0.0354281	0.508031	0.237231	1	0.207693	0.641577	-0.334579	12833700	0.0794678	0.0572399	0.25174	23	23	22	68.5	68.5	67	56.935	0	323.31	454430000000	212800000000	241620000000	16	15	17	16	16	17	17	15	17
D3ZBL3	D3ZBL3	Ngdn	ENSRNOG00000018069		0.375293	0.582038	-0.696545	-1.02005	-0.377299	0.288898	0.156836	0.18171	0.478666	0.135405	-0.696545	0.0639655	0.18171	0.0355394	0.508031	0.209148	1	0.478666	0.609869	-0.697965	37564800	0.0701765	0.146191	0.321379	11	11	11	53.3	53.3	53.3	35.814	0	152.13	8886000000	4147600000	4738400000	5	5	5	5	6	5	6	5	7
A0A0G2JV99	A0A0G2JV99;D3ZTA3	Mcm3ap	ENSRNOG00000001272		0.553674	1.19227	-0.320169	-0.435281	-0.402707	0.280035	0.505947	0.310324	0.872971	0.223227	-0.402707	0.00778254	0.310324	0.0355445	0.508031	0.365435	1	0.872971	0.609869	-0.386052	15037000	0.122626	0.451554	0.0593354	17	17	17	13.3	13.3	13.3	217.33	0	41.533	890500000	427820000	462690000	2	5	1	2	3	4	2	2	1
B0BN98	B0BN98	Llph	ENSRNOG00000004316		0.176863	0.422678	-0.188014	-0.296064	-0.402304	0.468721	0.341302	0.669575	0.29977	0.24771	-0.296064	0.0411495	0.468721	0.0355452	0.508031	0.493199	1	0.29977	0.609869	-0.295461	65224700	0.1655	0.173818	0.107146	4	4	4	40.5	40.5	40.5	14.932	0	84.611	5234900000	2535000000	2699900000	3	3	2	2	2	3	2	2	3
Q01714	Q01714	Sp1	ENSRNOG00000014084	Transcription factor Sp1	1.26232	2.38333	0.734167	0.132557	-0.126748	1.83859	1.01806	2.06384	1.82282	0.189914	0.132557	0.435431	1.83859	0.0355476	0.508031	1.64016	1	1.82282	0.794229	0.246659	141806000	0.550399	0.792672	0.441654	3	3	3	8	8	8	80.771	0	68.797	808310000	318790000	489520000	1	0	1	0	1	2	2	2	1
Q6AYY8	Q6AYY8	Slc33a1	ENSRNOG00000010023	Acetyl-coenzyme A transporter 1	-0.341885	NaN	1.94508	-0.0682567	-0.111522	-0.128685	-0.260152	-0.236086	-0.341885	1	-0.0682567	0.477192	-0.236086	0.0356383	0.508031	-0.208308	1	-0.341885	0.826197	0.588435	173904000	0.0699972	NaN	1.17509	5	5	5	10	10	10	61.101	0	12.969	894820000	343600000	551220000	2	3	2	0	1	1	1	1	0
Q3B8Q1	Q3B8Q1	Ddx21	ENSRNOG00000043099	Nucleolar RNA helicase 2	0.221071	0.285164	-0.177625	-0.625901	-0.496453	0.289158	0.345745	0.169203	0.253117	0.0801744	-0.496453	0.0829071	0.289158	0.0356977	0.508031	0.268035	1	0.253117	0.61309	-0.433326	33997700	0.0901465	0.0453207	0.230709	47	47	7	60.5	60.5	7.3	85.965	0	323.31	282330000000	132070000000	150250000000	36	35	34	29	31	39	32	32	34
D3ZDR2	D3ZDR2	Chmp6	ENSRNOG00000004014		-0.551004	-0.977845	-0.829357	0.186374	-0.207122	-0.298978	-0.167058	-0.180601	-0.764425	0.173325	-0.207122	0.439018	-0.180601	0.0357708	0.508031	-0.215546	1	-0.764425	0.797486	-0.283368	108674000	0.0725714	0.301822	0.51214	3	3	3	19.5	19.5	19.5	23.288	0	56.304	2217900000	1135900000	1082000000	1	1	2	2	2	1	2	2	2
A0A0G2K033	A0A0G2K033	Larp19			0.135929	0.933648	NaN	NaN	NaN	0.356595	0.730488	0.60966	0.534788	0.407962	NaN	1	0.60966	0.0359064	0.508091	0.565581	1	0.534788	1	NaN	NaN	0.190804	0.564073	NaN	19	2	2	31	4	4	102.19	0.0022812	3.4652	142620000	58291000	84325000	6	5	4	5	4	5	9	8	9
E9PTE1	E9PTE1	Son	ENSRNOG00000002021		NaN	NaN	NaN	NaN	NaN	0.633943	0.709996	NaN	NaN	1	NaN	1	0.67197	0.035988	0.508091	0.67197	1	NaN	1	NaN	35415400	0.0537781	NaN	NaN	43	1	1	29.7	0.9	0.9	252.64	0.0043188	2.6378	30505000	9780000	20725000	19	21	22	23	24	23	27	29	26
F1LPK9	F1LPK9;Q8CHJ1;Q8CHJ1-2;A0A140TAE9;A0A0G2KAR3	Pigu	ENSRNOG00000025181;ENSRNOG00000042074	Phosphatidylinositol glycan anchor biosynthesis class U protein	NaN	-0.0443944	0.904833	0.413786	-0.0141219	-0.292783	-0.274134	-0.145073	-0.0443944	1	0.413786	0.243108	-0.274134	0.0362245	0.509921	-0.23733	1	-0.0443944	0.669577	0.434832	157208000	0.0804395	NaN	0.459839	3	3	3	8.8	8.8	8.8	49.795	0	20.214	1239100000	549220000	689850000	1	2	2	1	0	0	1	1	1
D4A5U5	D4A5U5	Ovol2	ENSRNOG00000006850		0.182184	NaN	NaN	-0.218028	-0.326013	0.338339	0.301471	NaN	0.182184	1	-0.27202	0.12474	0.319905	0.036644	0.511354	0.319905	1	0.182184	0.638884	-0.27202	144868000	0.0260698	NaN	0.0763574	2	2	2	12.4	12.4	12.4	26.897	0.0006435	4.1492	414410000	180550000	233860000	0	1	1	0	0	1	0	0	0
B5DFM8	B5DFM8	Bcas2	ENSRNOG00000018783		0.245027	0.4057	0.150864	-0.227579	-0.291156	0.395909	0.21456	0.244255	0.325364	0.154108	-0.227579	0.467898	0.244255	0.0367259	0.511354	0.284908	1	0.325364	0.817104	-0.122624	225092000	0.0972696	0.113613	0.238971	13	13	13	79.6	79.6	79.6	26.101	0	323.31	21450000000	9777600000	11672000000	8	7	8	8	9	9	6	8	6
D3ZAR3	D3ZAR3;D3ZDH1	Sprr2d	ENSRNOG00000009115;ENSRNOG00000009168		NaN	0.595408	-2.14414	NaN	NaN	NaN	-2.1156	-1.88451	0.595408	1	-2.14414	1	-2.00005	0.036737	0.511354	-2.00005	1	0.595408	1	-2.14414	212345000	0.163404	NaN	NaN	1	1	1	16	16	16	8.8555	0.0026628	3.254	635790000	431650000	204150000	0	0	0	1	0	0	1	1	1
D4A6Y1	D4A6Y1;A0A0G2K6Y8	Npat	ENSRNOG00000024934		0.600655	NaN	0.399567	0.0504526	-0.407585	0.632923	0.563752	NaN	0.600655	1	0.0504526	0.957243	0.598337	0.0367578	0.511354	0.598337	1	0.600655	1	0.0141449	56703300	0.0489118	NaN	0.404799	4	4	4	6.1	6.1	6.1	151.61	0	84.917	375650000	167090000	208560000	3	4	2	1	1	1	0	0	0
D3ZH66	D3ZH66	Taf5	ENSRNOG00000020274		0.137525	0.862016	0.125167	-0.0462581	0.0249029	0.00561053	0.0116144	0.00922637	0.499771	0.399283	0.0249029	0.558469	0.00922637	0.0370161	0.511354	0.00881709	1	0.499771	0.882215	0.0346038	274275000	0.00302277	0.512292	0.0861231	14	14	14	27.1	27.1	27.1	86.703	0	28.574	1716200000	947710000	768460000	4	2	4	4	4	3	3	2	2
D3ZZV1	D3ZZV1;Q6EIX2	Pam16	ENSRNOG00000004608	Mitochondrial import inner membrane translocase subunit TIM16	NaN	-0.799045	0.265197	-0.49879	0.23842	-0.212969	-0.110651	-0.138785	-0.799045	1	0.23842	0.995455	-0.138785	0.0370367	0.511354	-0.154135	1	-0.799045	1	0.0016089	9911720	0.0528578	NaN	0.433565	2	2	2	32	32	32	13.771	0	22.171	587170000	271050000	316110000	2	0	1	0	0	0	1	1	1
Q920L7	Q920L7	Elovl5	ENSRNOG00000006331	Elongation of very long chain fatty acids protein 5	-1.33876	-2.81518	1.3027	0.760434	-0.035634	NaN	-0.750154	-0.843667	-2.07697	0.217406	0.760434	0.22418	-0.796911	0.037309	0.511354	-0.796911	1	-2.07697	0.667493	0.675833	84825600	0.0661235	1.04398	0.673166	2	2	2	7.4	7.4	7.4	35.235	0	14.9	602030000	299680000	302350000	0	0	0	1	0	1	2	2	2
F1LZH3	F1LZH3	Ezh1	ENSRNOG00000020336		NaN	NaN	0.311736	-0.0658534	-0.0860697	0.477945	0.537644	NaN	NaN	1	-0.0658534	0.720431	0.507794	0.0373791	0.511354	0.507794	1	NaN	0.994762	0.0532708	88902500	0.0422135	NaN	0.224065	6	4	4	14.7	11.2	11.2	85.348	0	10.633	147840000	66468000	81374000	1	2	2	1	0	1	1	1	1
P17955	P17955	Nup62	ENSRNOG00000048733	Nuclear pore glycoprotein p62	0.358802	0.516312	-0.029773	-0.258827	-0.380615	0.600804	0.30525	0.615767	0.437557	0.11337	-0.258827	0.162327	0.600804	0.0375035	0.511354	0.507274	1	0.437557	0.64184	-0.223072	101890000	0.175117	0.111376	0.178133	13	13	13	29	29	29	53.396	0	288.54	18075000000	8208700000	9866200000	8	7	7	7	6	7	6	5	6
D3ZFY8	D3ZFY8;F1M227;Q66H93	Ube2v1	ENSRNOG00000022456;ENSRNOG00000025580		-1.27442	-1.59205	-0.318532	-0.475123	0.521107	-0.459576	-0.742358	-0.396871	-1.43324	0.0702561	-0.318532	0.796644	-0.459576	0.0375342	0.511354	-0.532935	1	-1.43324	1	-0.0908493	105492000	0.184056	0.224598	0.535722	7	7	3	57.8	57.8	23.8	16.355	0	28.181	14999000000	7467400000	7531900000	0	1	1	2	0	1	4	5	4
P62078	P62078	Timm8b	ENSRNOG00000009888	Mitochondrial import inner membrane translocase subunit Tim8 B	-0.49822	-0.456548	-0.188367	0.0458725	-0.569078	-0.314804	-0.277849	-0.151252	-0.477384	0.0277683	-0.188367	0.316651	-0.277849	0.0376452	0.511354	-0.247968	1	-0.477384	0.720403	-0.237191	53635100	0.0857729	0.0294664	0.310369	3	3	3	42.2	42.2	42.2	9.2864	0	17.189	1232900000	752960000	479940000	0	2	0	2	0	1	1	2	2
Q5XHY0	Q5XHY0	Ddx18	ENSRNOG00000025430		0.00473853	0.338877	-0.271832	-0.696708	-0.548429	0.110082	0.174251	0.22835	0.171808	0.491099	-0.548429	0.0556144	0.174251	0.0377562	0.511354	0.170894	1	0.171808	0.609869	-0.505656	42680400	0.0592051	0.236272	0.215644	30	30	30	59.5	59.5	59.5	75.547	0	323.31	54727000000	26978000000	27749000000	18	21	14	18	16	18	15	19	19
Q64550	Q64550	Ugt1a1	ENSRNOG00000018740	UDP-glucuronosyltransferase 1-1	-0.209834	-0.636601	-0.0850587	-0.258818	-0.252871	-0.215514	-0.218892	-0.108544	-0.423217	0.2973	-0.252871	0.0731053	-0.215514	0.037821	0.511354	-0.180983	1	-0.423217	0.609869	-0.198916	94910400	0.0627572	0.30177	0.0986479	14	7	7	39.4	19.6	19.6	59.662	0	148.76	14109000000	6915400000	7193400000	9	10	10	10	7	8	7	8	8
Q6AYJ1	Q6AYJ1;A0A0G2K5S2	Recql	ENSRNOG00000012602	ATP-dependent DNA helicase Q1	-0.394608	-0.946383	-0.196123	-0.116317	0.0355248	-0.273701	-0.307922	-0.14752	-0.670496	0.248506	-0.116317	0.307209	-0.273701	0.0379923	0.511354	-0.243048	1	-0.670496	0.717587	-0.0923051	240796000	0.0844806	0.390164	0.117676	14	14	14	34.6	34.6	34.6	69.641	0	191.53	2806300000	1385900000	1420400000	4	1	2	3	3	2	2	4	2
B2RYB3	B2RYB3;A0A0G2K4F6	Srrm1	ENSRNOG00000018194		0.913086	1.41313	-0.0780246	-0.443339	0.117027	1.16287	0.728856	1.52145	1.16311	0.134798	-0.0780246	0.498094	1.16287	0.0382531	0.511354	1.13773	1	1.16311	0.840395	-0.134779	157444000	0.396896	0.353587	0.284461	10	10	10	15.9	15.9	15.9	102.43	0	323.31	16775000000	7349500000	9425600000	6	7	7	7	5	5	5	5	5
A0A0G2K9F7	A0A0G2K9F7;A8C4G9	Zmynd8	ENSRNOG00000019154		0.0315827	0.218941	0.0514756	-0.0223958	-0.311452	0.190358	0.102457	0.21496	0.125262	0.408795	-0.0223958	0.484857	0.190358	0.0383746	0.511354	0.169258	1	0.125262	0.831681	-0.0941242	168659000	0.0591451	0.132482	0.191802	13	13	13	18.5	18.5	18.5	130.09	0	70.226	1426400000	637350000	789050000	5	6	1	4	3	4	3	2	2
Q4QQW8	Q4QQW8	Plbd2	ENSRNOG00000001385	Putative phospholipase B-like 2	-0.320955	-0.588726	0.563646	0.172413	0.0352044	0.104304	0.219189	0.192141	-0.454841	0.182246	0.172413	0.245881	0.192141	0.0383782	0.511354	0.171878	1	-0.454841	0.67008	0.257088	43452900	0.0600637	0.189342	0.274208	11	11	11	28.5	28.5	28.5	65.455	0	67.059	2780600000	1220100000	1560500000	4	4	2	4	1	3	2	1	0
Q5EAN7	Q5EAN7	Terf2ip	ENSRNOG00000010712	Telomeric repeat-binding factor 2-interacting protein 1	0.517946	0.594355	0.0332508	-0.272407	-0.036403	0.960107	0.512725	0.582392	0.55615	0.0436636	-0.036403	0.425306	0.582392	0.038777	0.511354	0.685074	1	0.55615	0.789456	-0.091853	55037900	0.240719	0.0540292	0.160196	12	12	12	53.2	53.2	53.2	43.418	0	117.18	5011200000	2257500000	2753600000	4	6	3	4	4	3	3	5	6
Q5RKH0	Q5RKH0	Glyr1	ENSRNOG00000003065	Putative oxidoreductase GLYR1	0.275161	0.406858	-0.0758802	-0.544907	-0.493224	0.377936	0.210978	0.217746	0.34101	0.121435	-0.493224	0.129534	0.217746	0.0387921	0.511354	0.268887	1	0.34101	0.639521	-0.371337	9492830	0.0944998	0.0931233	0.257175	17	17	17	49.1	49.1	49.1	60.421	0	114.64	9161000000	4421000000	4740000000	8	9	10	7	7	9	7	6	7
P17425	P17425;Q68G44;P22791	Hmgcs1	ENSRNOG00000016552;ENSRNOG00000019120	Hydroxymethylglutaryl-CoA synthase, cytoplasmic;Hydroxymethylglutaryl-CoA synthase, mitochondrial	-1.16751	-2.79	0.882915	1.2715	0.333985	NaN	-0.401572	-0.453779	-1.97875	0.247695	0.882915	0.0927786	-0.427676	0.0388087	0.511354	-0.427676	1	-1.97875	0.615282	0.829467	145364000	0.0369162	1.14727	0.471038	21	21	21	62.9	62.9	62.9	57.433	0	172.49	6961500000	3060600000	3900900000	0	0	2	1	1	0	3	3	3
A0A0H2UHV4	A0A0H2UHV4;M0R7Z0;B2GUV7	Eif5b	ENSRNOG00000023356;ENSRNOG00000046621	Eukaryotic translation initiation factor 5B	0.105553	-0.806709	-0.54006	0.0468192	0.24596	-0.0917878	-0.164655	-0.0949677	-0.350578	0.582827	0.0468192	0.760165	-0.0949677	0.0388192	0.511354	-0.117137	1	-0.350578	1	-0.082427	46782700	0.0411828	0.645066	0.408638	21	21	21	21.2	21.2	21.2	136.41	0	96.758	6914200000	3691500000	3222600000	5	6	8	7	5	5	4	4	3
M0RDM7	M0RDM7	Pigg	ENSRNOG00000049895;ENSRNOG00000050374		-0.0307372	0.678613	0.288299	NaN	NaN	-0.448417	-0.395777	-0.212475	0.323938	0.528815	0.288299	1	-0.395777	0.0388311	0.511354	-0.352223	1	0.323938	1	0.288299	1988310	0.123854	0.501586	NaN	3	3	3	4.4	4.4	4.4	108.57	0	9.2997	135970000	66785000	69181000	1	3	1	0	1	0	1	1	1
Q99P55	Q99P55;F1LPB0	Sgpp1	ENSRNOG00000005175	Sphingosine-1-phosphate phosphatase 1	-0.604324	-0.801266	-0.126446	-0.00814758	-0.457748	-0.777429	-0.586666	-0.36925	-0.702795	0.088622	-0.126446	0.279966	-0.586666	0.0392159	0.511354	-0.577782	1	-0.702795	0.696458	-0.197447	108095000	0.204235	0.139259	0.233058	3	3	3	10.2	10.2	10.2	47.649	0	7.8091	413910000	206250000	207660000	1	1	2	0	1	1	1	1	2
Q6P791	Q6P791	Lamtor1	ENSRNOG00000020016	Ragulator complex protein LAMTOR1	1.80436	-2.09418	-0.243584	0.144786	-0.283058	0.286218	0.21085	0.42514	-0.144911	0.95276	-0.243584	0.449557	0.286218	0.0392457	0.511354	0.307403	1	-0.144911	0.804894	-0.127285	173182000	0.108705	2.75668	0.236446	7	7	7	67.7	67.7	67.7	17.721	0	44.06	3362800000	1602000000	1760700000	2	3	1	2	1	1	1	2	1
Q5M9G3	Q5M9G3;A0A0G2K8H0	Caprin1	ENSRNOG00000009152	Caprin-1	0.0575149	-1.11405	-0.0688532	0.442498	0.30496	0.0580019	0.118089	0.118022	-0.528266	0.532838	0.30496	0.276867	0.118022	0.0392533	0.511354	0.0980376	1	-0.528266	0.694991	0.226202	100343000	0.034672	0.82842	0.264617	11	11	11	28.9	28.9	28.9	78.12	0	323.31	19420000000	9676200000	9743900000	6	5	8	5	7	7	5	7	3
D3ZIF0	D3ZIF0	Zfp512	ENSRNOG00000039815		0.590355	0.116661	-0.272767	-0.49345	-0.46332	0.283076	0.424593	0.211505	0.353508	0.375797	-0.46332	0.0272604	0.283076	0.0393094	0.511354	0.306391	1	0.353508	0.609869	-0.409845	36109600	0.10844	0.334953	0.119666	11	11	11	31.5	31.5	31.5	63.958	0	65.451	5578300000	1247200000	4331200000	3	1	4	2	2	3	5	4	4
Q4KLH7	Q4KLH7	Rad21	ENSRNOG00000004420		0.360576	0.381165	0.0386297	-0.365137	-0.346857	0.564673	0.264803	0.474936	0.370871	0.0176666	-0.346857	0.230318	0.474936	0.0393197	0.511354	0.434804	1	0.370871	0.668431	-0.224455	92155500	0.153911	0.0145587	0.228021	28	28	27	60.6	60.6	58.9	71.991	0	287.56	14425000000	6733000000	7691600000	14	16	15	13	13	15	10	6	9
B2GUW6	B2GUW6	Aen	ENSRNOG00000018421	Apoptosis-enhancing nuclease	-0.183736	-0.334538	-0.548781	-0.75521	0.197407	0.363591	0.63812	0.357248	-0.259137	0.18026	-0.548781	0.330439	0.363591	0.0393267	0.511354	0.452986	1	-0.259137	0.72296	-0.368861	141559000	0.160362	0.106633	0.501147	6	6	6	23.5	23.5	23.5	37.061	0	19.452	799040000	388970000	410060000	1	1	0	1	0	1	2	3	4
D3ZZQ6	D3ZZQ6	Ints4	ENSRNOG00000012552		0.457867	-0.0191953	-0.129991	-0.0499833	-0.11923	0.182469	0.10733	0.0988845	0.219336	0.526674	-0.11923	0.0577603	0.10733	0.0395651	0.511769	0.129561	1	0.219336	0.609869	-0.0997348	168654000	0.0460135	0.337334	0.0434207	26	26	26	36.5	36.5	36.5	108.25	0	92.988	4814300000	2399200000	2415100000	9	11	7	8	7	8	4	5	6
D4A3V5	D4A3V5	Cgnl1	ENSRNOG00000017439		0.504789	-0.0815962	0.676827	0.0680092	-0.574293	0.317697	0.499723	0.255187	0.211597	0.602023	0.0680092	0.889398	0.317697	0.0396029	0.511769	0.357536	1	0.211597	1	0.0568476	74802400	0.127043	0.414637	0.625635	15	15	15	14.7	14.7	14.7	147.94	0	102.44	1581600000	720110000	861440000	2	5	4	7	7	6	3	1	2
Q68FP1-2	Q68FP1-2;Q68FP1	Gsn	ENSRNOG00000018991	Gelsolin	-1.74028	-1.97992	-0.234472	-0.266046	0.168218	-0.539779	-1.0808	-0.709372	-1.8601	0.0409515	-0.234472	0.5112	-0.709372	0.0398048	0.511769	-0.776649	1	-1.8601	0.848127	-0.110766	19799900	0.276712	0.16945	0.242123	21	21	11	51.7	51.7	31.2	80.928	0	186.81	7910600000	4623100000	3287500000	4	6	9	9	8	10	4	7	3
F1LMD5	F1LMD5	Mtf2	ENSRNOG00000000075		1.29172	NaN	0.529495	-0.00566624	-0.131678	1.14254	1.31097	0.612704	1.29172	1	-0.00566624	0.585068	1.14254	0.0398529	0.511769	1.02207	1	1.29172	0.903543	0.130717	2657180	0.364388	NaN	0.351052	3	3	3	9.4	9.4	9.4	66.878	0	73.777	434110000	177510000	256600000	0	1	2	2	0	1	2	1	0
D3ZMS1	D3ZMS1	Sf3b2	ENSRNOG00000020412		0.867056	0.70206	0.0191267	-0.209264	-0.196682	1.04123	0.879266	0.485088	0.784558	0.0666966	-0.196682	0.224066	0.879266	0.0398948	0.511769	0.801862	1	0.784558	0.667493	-0.12894	227576000	0.286039	0.116669	0.128384	37	37	37	48.7	48.7	48.7	98.146	0	323.31	77209000000	33661000000	43548000000	17	17	17	21	19	20	23	24	22
M0R3M4	M0R3M4;D4A054	Ranbp2	ENSRNOG00000000796		0.854103	-0.013836	0.116872	-0.0949761	-0.271417	0.627789	0.4072	0.312856	0.420133	0.510312	-0.0949761	0.535882	0.4072	0.040535	0.516111	0.449282	1	0.420133	0.864426	-0.0831737	29846500	0.161629	0.613725	0.194413	104	104	104	49.4	49.4	49.4	344.39	0	323.31	64933000000	29946000000	34987000000	42	50	31	43	42	46	34	37	33
A0A0G2K0E0	A0A0G2K0E0;Q6AYT6	Ddx56	ENSRNOG00000004670		0.223451	0.321942	-0.471735	-0.856463	-0.476955	0.530485	0.388731	0.24936	0.272697	0.11374	-0.476955	0.0420115	0.388731	0.0407705	0.516111	0.389525	1	0.272697	0.609869	-0.601718	87340600	0.140564	0.0696439	0.220631	20	20	20	58.1	58.1	58.1	61.367	0	200.69	12960000000	6431300000	6528300000	10	11	8	12	6	7	8	8	9
Q5XIS7	Q5XIS7	Ubap1	ENSRNOG00000012004	Ubiquitin-associated protein 1	0.664126	NaN	NaN	NaN	NaN	0.473527	0.538538	NaN	0.664126	1	NaN	1	0.506033	0.0408378	0.516111	0.506033	1	0.664126	1	NaN	62265500	0.0459697	NaN	NaN	2	2	2	4.6	4.6	4.6	55.139	0	8.3425	235910000	105620000	130290000	0	1	1	0	1	1	0	0	0
P62845	P62845;D3ZAK6	Rps15	ENSRNOG00000024603;ENSRNOG00000043026	40S ribosomal protein S15	-0.867016	-2.35216	0.136536	0.446095	0.386725	-0.504939	-0.296823	-0.268437	-1.60959	0.275177	0.386725	0.0764254	-0.296823	0.04101	0.516111	-0.356733	1	-1.60959	0.609869	0.323119	7693500	0.129133	1.05016	0.164289	6	6	6	64.8	64.8	64.8	17.04	0	323.31	19924000000	10178000000	9746200000	2	3	4	4	3	2	3	3	3
B5DFB2	B5DFB2;D4A250	Rbbp4	ENSRNOG00000021492;ENSRNOG00000028052		0.560088	0.235093	0.136057	-0.176803	-0.0349074	0.562082	0.437951	0.259543	0.397591	0.247001	-0.0349074	0.806567	0.437951	0.0410583	0.516111	0.419859	1	0.397591	1	-0.025218	168469000	0.152079	0.229806	0.156655	17	12	12	68.5	59.8	59.8	47.655	0	110.23	22467000000	9403300000	13064000000	11	14	10	10	9	9	9	9	9
P24368	P24368	Ppib	ENSRNOG00000016781	Peptidyl-prolyl cis-trans isomerase B	-0.172805	-0.4191	0.242557	0.356736	-0.0185389	-0.265856	-0.151766	-0.14486	-0.295952	0.251027	0.242557	0.223459	-0.151766	0.0411021	0.516111	-0.187494	1	-0.295952	0.667493	0.193585	71388500	0.0679515	0.174157	0.192371	14	14	14	57.9	57.9	57.9	23.802	0	323.31	169420000000	81239000000	88180000000	12	12	12	12	12	13	10	11	11
Q6AY58	Q6AY58	Bcap31	ENSRNOG00000019053		-0.97755	-1.35	0.116262	0.405664	-0.207239	-0.680918	-0.620126	-0.316195	-1.16378	0.101015	0.116262	0.613549	-0.620126	0.0411138	0.516111	-0.53908	1	-1.16378	0.920999	0.104896	152845000	0.195403	0.263364	0.30661	6	6	6	25.3	25.3	25.3	27.911	0	56.713	11490000000	6574300000	4916200000	1	2	3	1	2	3	4	3	2
P61589	P61589;B2RYP0;A0A0G2K6E0;Q5XIM3;P62747	Rhoa	ENSRNOG00000012630;ENSRNOG00000021403;ENSRNOG00000042954;ENSRNOG00000050519	Rho-related GTP-binding protein RhoB;Transforming protein RhoA	-0.670378	-1.20965	0.0271504	0.211535	0.128597	-0.227506	-0.435279	-0.260643	-0.940014	0.177835	0.128597	0.148532	-0.260643	0.0411521	0.516111	-0.307809	1	-0.940014	0.641577	0.122428	139024000	0.111628	0.381323	0.0923472	10	10	10	65.8	65.8	65.8	21.782	0	323.31	63246000000	32869000000	30377000000	7	7	5	7	7	7	5	6	5
D4ACV0	D4ACV0	Nelfb	ENSRNOG00000009377		0.258192	1.09882	NaN	-1.28455	-0.0709213	0.630895	0.718351	NaN	0.678508	0.353078	-0.677736	0.464887	0.674623	0.0412067	0.516111	0.674623	1	0.678508	0.815069	-0.677736	2395730	0.0618402	0.594417	0.858165	7	7	7	15.5	15.5	15.5	65.633	0	17.885	562780000	263330000	299450000	2	2	1	1	1	1	0	0	0
Q08849	Q08849	Stx3	ENSRNOG00000021013	Syntaxin-3	-0.00218015	0.0193461	0.356552	0.190678	-0.32723	-0.123818	NaN	-0.141095	0.00858295	0.571441	0.190678	0.755813	-0.132457	0.0414606	0.517929	-0.132457	1	0.00858295	1	0.0733331	235218000	0.0122168	0.0152213	0.356675	5	5	5	22.8	22.8	22.8	33.257	0	31.188	1171900000	541890000	630000000	2	4	0	0	2	0	1	2	0
Q9JL55	Q9JL55;M0R5Q9	Gde1	ENSRNOG00000050445	Glycerophosphodiester phosphodiesterase 1	-2.33119	NaN	-0.232379	NaN	NaN	0.198082	0.173767	NaN	-2.33119	1	-0.232379	1	0.185925	0.0415689	0.517929	0.185925	1	-2.33119	1	-0.232379	195338000	0.0171933	NaN	NaN	3	3	3	18.7	18.7	18.7	37.634	0.00022655	5.4621	143290000	62015000	81277000	1	2	1	1	0	3	0	0	0
F1MAA7	F1MAA7;A0A0U1RS20	Lamc1	ENSRNOG00000002680		0.134898	-0.259584	0.655846	0.12749	0.222168	0.129835	0.284787	0.223054	-0.0623428	0.805107	0.222168	0.175495	0.223054	0.0420812	0.522946	0.212559	1	-0.0623428	0.645792	0.335168	75622200	0.0780075	0.278941	0.281721	15	15	15	15.9	15.9	15.9	177.38	0	84.998	1462200000	705170000	757040000	5	7	4	4	3	3	2	2	2
G3V637	G3V637;Q62753	Stxbp2	ENSRNOG00000000994	Syntaxin-binding protein 2	-0.53845	-0.81812	-0.0333012	0.217436	0.0973397	-0.295157	-0.528415	-0.288883	-0.678285	0.129432	0.0973397	0.324415	-0.295157	0.0423314	0.523473	-0.370818	1	-0.678285	0.721837	0.0938249	4342250	0.136519	0.197756	0.125406	22	22	22	54.5	54.5	54.5	66.653	0	264.57	4425800000	2233500000	2192400000	5	7	9	6	6	6	3	6	5
B5DF02	B5DF02	Eed	ENSRNOG00000017509		0.0712787	0.0850792	0.279761	0.0294175	-0.202219	0.126645	0.133357	0.0618313	0.0781789	0.0560441	0.0294175	0.821751	0.126645	0.0423429	0.523473	0.107278	1	0.0781789	1	0.0356535	160494000	0.0395007	0.0097584	0.241051	13	13	13	33.3	33.3	33.3	50.197	0	37.319	5089200000	2470200000	2619000000	4	5	5	3	3	5	3	4	3
Q4V7B3	Q4V7B3;D4AE50	Nfx1	ENSRNOG00000009015		-0.225061	NaN	-0.15404	NaN	0.663049	-0.211029	-0.184228	NaN	-0.225061	1	0.254504	0.645323	-0.197629	0.043102	0.525512	-0.197629	1	-0.225061	0.941605	0.254504	61822500	0.0189516	NaN	0.577769	1	1	1	2.7	2.7	2.7	91.203	0.0016824	3.735	38968000	16838000	22130000	1	1	1	1	1	1	0	0	0
P49793	P49793;F1LPQ1;P49793-2	Nup98	ENSRNOG00000020347	Nuclear pore complex protein Nup96;Nuclear pore complex protein Nup98;Nuclear pore complex protein Nup98-Nup96	0.432431	-0.173843	-0.00580816	-0.350342	-0.374372	0.388536	0.411411	0.188499	0.129294	0.743342	-0.350342	0.177465	0.388536	0.0432042	0.525512	0.329482	1	0.129294	0.646459	-0.243507	173403000	0.122629	0.4287	0.206204	55	55	55	45.7	45.7	45.7	197.28	0	323.31	34106000000	16008000000	18098000000	24	22	20	17	24	24	18	19	19
Q5XI68	Q5XI68	Dr1	ENSRNOG00000000070;ENSRNOG00000048308	Protein Dr1	-0.396601	-0.870361	0.0613704	0.30353	0.344456	0.210785	0.443756	0.295713	-0.633481	0.227805	0.30353	0.115815	0.295713	0.0432117	0.525512	0.316752	1	-0.633481	0.638884	0.236452	2040350	0.117902	0.334999	0.153	5	5	5	46.6	46.6	46.6	19.429	0	27.515	1737300000	787540000	949730000	2	1	2	1	1	1	1	1	1
Q63524	Q63524	Tmed2	ENSRNOG00000001053	Transmembrane emp24 domain-containing protein 2	-0.345843	-1.31672	0.328662	0.156764	-0.0469535	-0.45694	-0.227326	-0.282058	-0.831279	0.336482	0.156764	0.310492	-0.282058	0.0432361	0.525512	-0.322108	1	-0.831279	0.719194	0.146157	39342100	0.119932	0.686511	0.188032	5	5	5	30.8	30.8	30.8	22.733	0	123.57	11241000000	5275700000	5965500000	4	4	4	4	3	4	2	2	2
A0A140UHX9	A0A140UHX9;Q6AYE1	Ccz1b	ENSRNOG00000001032		0.101516	0.526476	0.805375	1.04502	0.232089	-0.354077	-0.247954	-0.164205	0.313996	0.378735	0.805375	0.102484	-0.247954	0.0432844	0.525512	-0.255412	1	0.313996	0.631037	0.69416	14682900	0.0951554	0.300493	0.417719	7	7	7	18.1	18.1	18.1	55.596	0	8.4536	528950000	206580000	322380000	1	0	1	0	1	0	0	2	1
A0A096MJ11	A0A096MJ11	Gsdmd	ENSRNOG00000007728		0.125387	-2.04133	-0.00779509	0.569912	0.65101	-0.431267	-0.368182	-0.193159	-0.957971	0.539055	0.569912	0.190533	-0.368182	0.0433463	0.525512	-0.330869	1	-0.957971	0.650369	0.404376	116782000	0.123362	1.5321	0.359246	13	13	13	36.1	36.1	36.1	53.212	0	71.531	2898400000	1483300000	1415100000	2	0	2	2	0	2	2	2	0
Q5BJP4	Q5BJP4	Rbm39	ENSRNOG00000019848;ENSRNOG00000049814		0.205429	0.0922187	-0.204142	-0.297377	0.135649	0.488603	0.219486	0.430515	0.148824	0.231381	-0.204142	0.451859	0.430515	0.0434096	0.525512	0.379535	1	0.148824	0.806103	-0.121957	158744000	0.141617	0.0800519	0.227911	19	19	19	51.9	51.9	51.9	58.683	0	323.31	52783000000	22486000000	30297000000	10	11	11	11	12	14	13	13	13
E9PTJ1	E9PTJ1	Coil	ENSRNOG00000000244		0.705281	0.442818	0.0176193	-0.22119	-0.41735	0.467276	0.221109	0.311463	0.574049	0.143077	-0.22119	0.241566	0.311463	0.043519	0.525512	0.333283	1	0.574049	0.669577	-0.206974	73778200	0.124526	0.185589	0.217833	6	6	6	15.5	15.5	15.5	65.125	0	55.642	1894500000	840730000	1053800000	4	5	2	3	5	4	4	3	3
Q99JC6	Q99JC6	Tapbp	ENSRNOG00000029500		-0.215055	-0.73415	0.447146	0.318552	-0.183032	-0.420919	-0.187736	-0.34605	-0.474602	0.31859	0.318552	0.418712	-0.34605	0.0436223	0.525512	-0.318235	1	-0.474602	0.784265	0.194222	7526670	0.119054	0.367056	0.332978	5	5	5	13.4	13.4	13.4	50.044	0	39.39	1882000000	878710000	1003300000	3	4	2	3	2	4	1	2	2
Q5U2Y6	Q5U2Y6	Tfip11	ENSRNOG00000000663	Tuftelin-interacting protein 11	0.521024	0.0236696	-0.0910641	-0.0872894	0.13304	0.41172	0.408443	0.191434	0.272347	0.471099	-0.0872894	0.857302	0.408443	0.043686	0.525512	0.337199	1	0.272347	1	-0.0151044	52077900	0.126247	0.351683	0.128311	25	25	25	39.4	39.4	39.4	96.151	0	85.686	8495400000	3920200000	4575200000	7	7	7	5	6	6	4	5	7
D3ZU83	D3ZU83	Ergic3	ENSRNOG00000031085		-0.0642743	-0.537566	0.200808	NaN	0.540127	-0.357319	-0.764283	-0.518682	-0.30092	0.424242	0.370467	0.273399	-0.518682	0.0437749	0.525512	-0.546761	1	-0.30092	0.691904	0.370467	157918000	0.20493	0.334668	0.239934	7	7	7	14.9	14.9	14.9	43.223	0	21.365	1130200000	773670000	356550000	2	4	2	1	3	4	1	2	2
D4A206	D4A206	Tcof1	ENSRNOG00000026108		1.36672	1.71322	0.101556	0.157975	-0.371242	0.989729	0.927107	1.75224	1.53997	0.0713203	0.101556	0.844976	0.989729	0.0439511	0.525512	1.22303	1	1.53997	1	-0.037237	55316300	0.459384	0.245009	0.290629	20	20	20	20.1	20.1	20.1	144.66	0	323.31	20856000000	8247900000	12608000000	5	6	6	7	4	5	11	15	12
G3V6Y9	G3V6Y9;O55035	Ppig	ENSRNOG00000007673	Peptidyl-prolyl cis-trans isomerase G	0.220511	0.309582	-0.0799884	-0.487662	-0.248834	0.311196	0.265592	0.52496	0.265046	0.10598	-0.248834	0.148011	0.311196	0.0442662	0.525512	0.36725	1	0.265046	0.641577	-0.272161	62571700	0.138472	0.0629826	0.204835	9	9	9	13.6	13.6	13.6	88.318	0	99.449	5159800000	2402600000	2757300000	3	2	3	5	5	2	4	4	4
D3ZVW3	D3ZVW3	Zc3h4	ENSRNOG00000015229	Zinc finger CCCH domain-containing protein 4	1.35539	2.40393	0.253868	0.360573	0.270284	1.09476	1.72438	2.40917	1.87966	0.173163	0.270284	0.0124175	1.72438	0.0443018	0.525512	1.74277	1	1.87966	0.609869	0.294908	79607100	0.657396	0.741429	0.0574566	8	8	8	10.8	10.8	10.8	126.73	0	17	1150000000	427870000	722130000	3	5	2	1	1	1	2	1	1
D3ZUC2	D3ZUC2	Mov10	ENSRNOG00000012946		-0.314811	NaN	0.00255552	0.0480927	0.135269	-0.277944	-0.241675	NaN	-0.314811	1	0.0480927	0.252442	-0.25981	0.044363	0.525512	-0.25981	1	-0.314811	0.672969	0.0619724	226697000	0.0256457	NaN	0.0674366	2	2	2	2.6	2.6	2.6	113.76	0	28.365	265910000	121590000	144330000	1	1	1	2	2	1	0	0	0
D3ZT01	D3ZT01	Cog2	ENSRNOG00000018228		0.529632	NaN	0.137648	0.628355	0.389782	0.517436	0.369606	0.235083	0.529632	1	0.389782	0.112802	0.369606	0.0443813	0.525512	0.374042	1	0.529632	0.636278	0.385262	67991600	0.141229	NaN	0.245385	6	6	6	14.4	14.4	14.4	81.804	0	15.743	893250000	358200000	535050000	2	2	0	1	2	1	1	1	0
B1WBY7	B1WBY7	Erlin1	ENSRNOG00000012911		-0.269067	-0.757715	0.391202	0.259162	-0.0655887	-0.408294	-0.191569	-0.418755	-0.513391	0.282777	0.259162	0.287451	-0.408294	0.0444143	0.525512	-0.339539	1	-0.513391	0.697885	0.194925	271255000	0.128253	0.345526	0.235073	9	7	7	33.9	27	27	39.266	0	21.769	1288000000	675640000	612360000	4	5	4	4	4	4	4	6	5
D4AD33	D4AD33	Fam103a1	ENSRNOG00000019426		-0.0972703	-0.597911	NaN	NaN	NaN	NaN	0.493288	0.567545	-0.347591	0.397332	NaN	1	0.530417	0.0444902	0.525512	0.530417	1	-0.347591	1	NaN	144527000	0.0525078	0.354006	NaN	2	2	2	21	21	21	14.414	0	23.214	128810000	53951000	74862000	0	0	1	1	0	1	1	0	1
O55159	O55159	Epcam	ENSRNOG00000015667	Epithelial cell adhesion molecule	-0.13157	0.0612949	0.379048	-0.0424095	-0.203831	-0.301565	-0.258587	-0.511564	-0.0351376	0.77755	-0.0424095	0.822697	-0.301565	0.0446779	0.52618	-0.357239	1	-0.0351376	1	0.0442693	21264100	0.135366	0.136376	0.300952	6	6	6	37.8	37.8	37.8	35.207	0	311.34	36996000000	18072000000	18924000000	4	5	5	5	5	5	5	5	5
D3ZAY8	D3ZAY8	Pnn	ENSRNOG00000004061		0.481989	0.382487	-0.131087	-0.474368	-0.405662	0.2175	0.439353	0.49058	0.432238	0.0729549	-0.405662	0.0846942	0.439353	0.0448065	0.52618	0.382478	1	0.432238	0.61309	-0.337039	89685200	0.145153	0.0703589	0.181638	25	25	25	38.7	38.7	38.7	82.609	0	202.38	35555000000	16387000000	19168000000	10	13	14	12	10	14	11	9	12
D3ZW38	D3ZW38	Exosc6	ENSRNOG00000018582		0.320647	0.0320677	0.229925	-0.0136091	0.0627353	0.290097	0.407621	0.184203	0.176358	0.436543	0.0627353	0.325103	0.290097	0.0449522	0.52618	0.293974	1	0.176358	0.721837	0.0930172	54016200	0.111759	0.204057	0.124559	7	7	7	34.9	34.9	34.9	28.399	0	53.616	4992300000	2457700000	2534500000	2	3	2	2	3	3	3	2	5
Q07266-2	Q07266-2;A0A0H2UHL9;Q07266	Dbn1	ENSRNOG00000014170	Drebrin	-0.048189	0.29203	-1.2306	-1.44695	-1.25143	0.555825	0.251931	0.392007	0.121921	0.604113	-1.25143	0.0027569	0.392007	0.0449877	0.52618	0.399921	1	0.121921	0.609869	-1.30966	11788600	0.152101	0.240571	0.119352	10	10	10	27.2	27.2	27.2	72.601	0	66.898	1992000000	1067800000	924210000	2	4	1	0	3	1	1	1	1
P18614	P18614	Itga1	ENSRNOG00000012080	Integrin alpha-1	NaN	3.00312	-0.147422	NaN	NaN	-0.574646	-0.254272	-0.434793	3.00312	1	-0.147422	1	-0.434793	0.045202	0.526844	-0.421237	1	3.00312	1	-0.147422	71666600	0.160616	NaN	NaN	5	5	5	4.8	4.8	4.8	130.81	0	12.911	587680000	238580000	349100000	2	2	1	0	0	0	0	1	1
A0A0G2JUQ6	A0A0G2JUQ6	Zfp185			0.903878	2.64197	0.665196	1.08427	0.208797	1.07766	0.62315	1.41196	1.77292	0.290145	0.665196	0.122936	1.07766	0.0452653	0.526844	1.03759	1	1.77292	0.638884	0.652754	NaN	0.395927	1.22902	0.437868	15	15	15	43.1	43.1	43.1	52.813	0	150.31	7677200000	2868000000	4809200000	4	5	5	6	7	6	2	2	2
Q5M947	Q5M947	Rrp15	ENSRNOG00000002450	RRP15-like protein	0.10633	1.07133	-0.263094	-0.36734	-0.44024	0.369142	0.585816	0.821923	0.588832	0.437022	-0.36734	0.0201214	0.585816	0.045434	0.527521	0.592294	1	0.588832	0.609869	-0.356891	109807000	0.22646	0.682362	0.0890344	7	7	7	23.2	23.2	23.2	30.926	0	19.683	5750200000	2745300000	3004800000	4	4	3	4	3	3	2	3	1
F1LNG8	F1LNG8;Q5BK62	Mpv17	ENSRNOG00000049430	Protein Mpv17	NaN	NaN	-0.486509	NaN	-0.0138325	-0.680966	-0.787418	NaN	NaN	1	-0.250171	0.481904	-0.734192	0.046072	0.53363	-0.734192	1	NaN	0.828834	-0.250171	36403900	0.0752732	NaN	0.334233	1	1	1	13.6	13.6	13.6	18.75	0	6.1007	183110000	98272000	84834000	1	1	1	0	0	0	0	0	0
B5DFA5	B5DFA5	Kdelc1			0.162855	-0.279389	0.439676	NaN	NaN	-0.374884	-0.747156	-0.433039	-0.0582671	0.835975	0.439676	1	-0.433039	0.0463241	0.535251	-0.51836	1	-0.0582671	1	0.439676	NaN	0.200265	0.312713	NaN	2	2	2	7	7	7	58.11	0	8.1415	120920000	64803000	56119000	1	1	1	1	0	1	0	1	0
D3ZGI8	D3ZGI8	Mrm2	ENSRNOG00000043267	Mitochondrial rRNA methyltransferase 2	0.299999	-0.310528	0.0425584	0.349343	-0.104849	0.310495	0.140909	0.208106	-0.00526457	0.989022	0.0425584	0.548682	0.208106	0.0467992	0.53855	0.219837	1	-0.00526457	0.873643	0.0956842	18391400	0.0853992	0.431708	0.23171	2	2	2	9.3	9.3	9.3	27.27	0.0037616	2.724	430550000	194720000	235830000	1	1	0	1	1	1	1	1	1
P97571	P97571;F1LS29	Capn1	ENSRNOG00000020935	Calpain-1 catalytic subunit	-0.281895	-1.70022	-0.0269765	0.249593	0.606877	-0.802663	-0.578766	-0.352814	-0.991058	0.395401	0.249593	0.270794	-0.578766	0.0469388	0.53855	-0.578081	1	-0.991058	0.689238	0.276498	228281000	0.224925	1.00291	0.317782	30	30	30	51.8	51.8	51.8	82.118	0	85.57	5217600000	2839100000	2378500000	0	3	3	2	3	0	6	7	2
D4A321	D4A321	Dhx38	ENSRNOG00000014619		0.175301	-0.237098	-0.00956565	0.0071049	0.310341	1.72559	1.8696	0.812768	-0.0308987	0.905308	0.0071049	0.427649	1.72559	0.0471582	0.53855	1.46932	1	-0.0308987	0.789456	0.102627	52935400	0.57313	0.29161	0.180079	13	13	13	14.3	14.3	14.3	140.47	0	28.074	795680000	403280000	392400000	3	4	0	1	0	2	1	2	0
Q5U2Z3	Q5U2Z3;A0A0H2UHZ2	Nap1l4	ENSRNOG00000020615	Nucleosome assembly protein 1-like 4	-0.590968	-0.815786	0.0636324	0.576863	0.519817	-0.295828	-0.510657	-0.25359	-0.703377	0.100887	0.519817	0.140176	-0.295828	0.0471702	0.53855	-0.353358	1	-0.703377	0.641577	0.386771	223576000	0.137852	0.15897	0.281296	13	12	12	49	46.4	46.4	43.916	0	176.7	8797000000	3905100000	4892000000	6	5	8	5	6	4	5	7	4
A0A0G2K849	A0A0G2K849;F1LT11	Taf4b	ENSRNOG00000026023		0.399153	2.77904	0.103286	0.125088	-0.0524496	1.25102	0.633022	1.47767	1.5891	0.409184	0.103286	0.404237	1.25102	0.0471739	0.53855	1.12057	1	1.5891	0.774202	0.0586415	6169030	0.437174	1.68283	0.0968233	12	12	12	29.9	29.9	29.9	68.602	0	61.662	2605600000	966090000	1639600000	2	4	2	2	3	1	4	4	4
B5DEK0	B5DEK0	Rprd1b	ENSRNOG00000012923		0.813655	0.0617519	-0.323776	-0.0774457	0.33325	1.19147	0.605849	0.668889	0.437704	0.451777	-0.0774457	0.916688	0.668889	0.0473773	0.539086	0.82207	1	0.437704	1	-0.0226573	161051000	0.32146	0.531676	0.331921	12	12	10	55.2	55.2	43.9	36.883	0	75.965	4831200000	2154700000	2676500000	4	2	3	3	1	4	5	5	5
Q05096	Q05096;Q05096-3;Q05096-2	Myo1b		Unconventional myosin-Ib	-0.189471	-0.791607	-0.127607	-0.580176	-0.562286	-0.0904969	-0.210962	-0.188461	-0.490539	0.350439	-0.562286	0.103529	-0.188461	0.0476423	0.539086	-0.163307	1	-0.490539	0.631155	-0.423356	NaN	0.064051	0.425775	0.256282	41	41	40	44	44	43.2	131.92	0	323.31	31559000000	16567000000	14992000000	18	23	20	20	21	21	14	16	19
D4A0T8	D4A0T8	Dhrs7	ENSRNOG00000005589		-0.193625	-0.523344	0.450505	0.321635	-0.0905565	-0.176347	-0.0969417	-0.0908496	-0.358485	0.274408	0.321635	0.298422	-0.0969417	0.0478173	0.539086	-0.121379	1	-0.358485	0.709	0.227195	104961000	0.0477005	0.233146	0.282624	12	12	12	47.1	47.1	47.1	38.493	0	63.06	5115800000	2354100000	2761700000	5	5	5	2	3	4	3	4	3
F2Z3T0	F2Z3T0;Q4V8C8	Cdc73	ENSRNOG00000003258	Parafibromin	0.399265	0.151141	-0.0111902	-0.221653	-0.152627	0.632991	0.308441	0.371586	0.275203	0.269622	-0.152627	0.173752	0.371586	0.0478546	0.539086	0.437673	1	0.275203	0.645565	-0.12849	65392600	0.172072	0.17545	0.107288	22	22	22	49.5	49.5	49.5	60.576	0	73.54	7782000000	3837100000	3944900000	8	8	6	8	5	10	9	8	9
F1LYI7	F1LYI7	Tmem256	ENSRNOG00000037540		-0.13923	-1.08289	0.0685746	0.151406	0.232965	-0.528637	-0.243587	-0.561543	-0.611059	0.418594	0.151406	0.0862101	-0.528637	0.047884	0.539086	-0.444589	1	-0.611059	0.61309	0.150982	56191100	0.174849	0.667266	0.0821959	2	2	2	31.9	31.9	31.9	11.776	0	30.577	6287900000	2718900000	3569000000	1	1	1	1	2	1	1	1	1
F7FG68	F7FG68	Larp4			-0.278227	-0.553892	NaN	NaN	-0.452088	-0.152965	-0.131511	NaN	-0.416059	0.203656	-0.452088	1	-0.142238	0.0479211	0.539086	-0.142238	1	-0.416059	1	-0.452088	NaN	0.0151705	0.194925	NaN	4	4	4	9	9	9	67.257	0	6.4033	242240000	130900000	111330000	0	2	1	1	1	3	0	0	0
Q3KRE2	Q3KRE2	Mettl7a	ENSRNOG00000001376		-0.307548	-0.5913	0.314206	0.0556059	-0.272131	-0.349023	-0.172609	-0.200355	-0.449424	0.194668	0.0556059	0.865522	-0.200355	0.0480863	0.539086	-0.240662	1	-0.449424	1	0.0325603	139784000	0.094863	0.200643	0.293847	11	11	11	51.6	51.6	51.6	28.142	0	176.21	18206000000	9525000000	8680700000	3	3	3	3	3	4	3	5	2
F1LW74	F1LW74	Iqgap2	ENSRNOG00000025406		0.970759	0.790362	NaN	0.275657	0.354313	0.372113	0.324141	0.652345	0.88056	0.0649841	0.314985	0.0790769	0.372113	0.0481246	0.539086	0.449533	1	0.88056	0.61309	0.314985	45296400	0.177271	0.12756	0.055618	19	16	16	17.1	15.3	15.3	162.97	0	28.764	1492300000	672520000	819760000	5	4	4	4	8	6	3	5	4
D4A1K2	D4A1K2	Rpl7l1	ENSRNOG00000016269		0.17503	0.444067	-0.210794	-0.65505	-0.643486	0.641163	0.601264	0.275715	0.309548	0.260978	-0.643486	0.0750563	0.601264	0.0485338	0.540472	0.506047	1	0.309548	0.609869	-0.50311	15416100	0.200468	0.190238	0.253219	11	11	11	48.8	48.8	48.8	28.531	0	78.06	15715000000	7511300000	8203500000	4	4	4	4	5	3	5	5	5
A0A0G2JWD6	A0A0G2JWD6;D3ZIF5	Ap3b1	ENSRNOG00000010624		NaN	0.0958569	-0.152617	0.220454	0.14072	0.180657	0.355016	0.195753	0.0958569	1	0.14072	0.602357	0.195753	0.0485524	0.540472	0.243809	1	0.0958569	0.91481	0.0695188	43195200	0.0966038	NaN	0.196463	7	7	6	7.2	7.2	6.5	121.5	0.00022351	5.0781	531960000	249290000	282670000	0	2	0	1	0	0	1	1	0
A1L1J9	A1L1J9	Lmf2	ENSRNOG00000030633	Lipase maturation factor 2	-0.13724	-0.733712	0.498323	0.126783	-0.430351	-0.398746	-0.335189	-0.168025	-0.435476	0.382281	0.126783	0.832308	-0.335189	0.0485881	0.540472	-0.300653	1	-0.435476	1	0.0649182	130007000	0.119174	0.421769	0.467417	7	7	7	15	15	15	80.253	0	107.61	2539900000	1218100000	1321800000	2	4	0	1	1	1	1	1	3
E9PTB2	E9PTB2;A0A1W2Q6F0;A0A1W2Q689	Supt5h	ENSRNOG00000032034	Transcription elongation factor SPT5	0.0580092	-0.260568	-0.180314	-0.274735	-0.082753	0.148907	0.142285	0.0641771	-0.101279	0.639454	-0.180314	0.0837495	0.142285	0.0489142	0.542717	0.118456	1	-0.101279	0.61309	-0.179267	86651800	0.0471238	0.225268	0.0959953	37	37	37	46.6	46.6	46.6	121.04	0	323.31	21387000000	10339000000	11048000000	13	16	12	11	12	10	11	12	15
M0R3S3	M0R3S3	Chaf1a	ENSRNOG00000046479		0.0803304	0.0287709	NaN	1.04089	0.0712086	0.656155	0.314972	0.385486	0.0545507	0.281052	0.55605	0.456516	0.385486	0.0490238	0.542717	0.452204	1	0.0545507	0.808513	0.55605	9988290	0.180111	0.036458	0.68567	15	15	15	25.8	25.8	25.8	101.75	0	50.75	1839000000	763020000	1076000000	8	7	6	4	6	8	5	4	5
A0A0G2JSQ4	A0A0G2JSQ4;P04692-7;P04692-5;P04692-4	Tpm1	ENSRNOG00000018184	Tropomyosin alpha-1 chain	-0.551402	-0.754429	-0.524118	0.415759	0.0526018	-0.100585	-0.238393	-0.214015	-0.652916	0.0981937	0.0526018	0.952028	-0.214015	0.049179	0.542717	-0.184331	1	-0.652916	1	-0.018586	77147600	0.0735435	0.143562	0.473965	16	4	0	53.2	14.5	0	28.556	0	122.43	11811000000	6267600000	5543200000	7	7	8	6	6	7	7	7	7
A1A5R1	A1A5R1;A0A0G2JYY7;A0A0G2JYU0;D3ZSL1	Rbfox2	ENSRNOG00000002827;ENSRNOG00000004688	RNA binding protein fox-1 homolog;RNA binding protein fox-1 homolog 2	-0.334676	0.701608	-0.435515	-0.697833	-0.327122	0.356135	0.16622	0.216734	0.183466	0.783353	-0.435515	0.0474888	0.216734	0.0492448	0.542717	0.246363	1	0.183466	0.609869	-0.486823	62629400	0.0983635	0.732763	0.190607	5	5	5	28	28	28	45.55	0	100.21	2664600000	1359100000	1305500000	3	2	2	3	2	2	1	2	2
Q62867	Q62867	Ggh	ENSRNOG00000007351	Gamma-glutamyl hydrolase	-0.101117	-1.07101	0.138953	-0.917134	0.0113116	-0.584458	-0.245225	-0.450546	-0.586062	0.440072	0.0113116	0.522726	-0.450546	0.0495035	0.543236	-0.426743	1	-0.586062	0.856611	-0.255623	38693600	0.170864	0.685815	0.576429	7	7	7	22.7	22.7	22.7	35.83	0	129.28	13767000000	9390400000	4376900000	3	4	2	2	2	3	4	2	5
Q920A6	Q920A6	Scpep1	ENSRNOG00000002358	Retinoid-inducible serine carboxypeptidase	-0.350761	-0.683692	0.24917	0.159858	-0.137012	-0.24546	-0.187212	-0.403011	-0.517227	0.198226	0.159858	0.518565	-0.24546	0.0495931	0.543236	-0.278561	1	-0.517227	0.853307	0.0906721	73846400	0.111642	0.235418	0.202174	7	7	7	20.8	20.8	20.8	51.174	0	104.13	5433000000	2400300000	3032700000	4	4	4	4	4	4	2	3	3
D3ZUM4	D3ZUM4	Glb1	ENSRNOG00000010196	Beta-galactosidase	-0.273629	-0.466927	0.363638	0.0984218	0.201562	-0.508941	-0.477263	-0.215854	-0.370278	0.162543	0.201562	0.103247	-0.477263	0.0497436	0.543236	-0.400686	1	-0.370278	0.631155	0.221207	121752000	0.160851	0.136683	0.133695	17	17	16	33.5	33.5	31.7	73.227	0	101.9	12499000000	6523100000	5975700000	4	4	4	3	6	3	5	6	5
D4A986	D4A986	Mbd2	ENSRNOG00000011853		0.517624	0.427403	-0.150097	-0.376963	-0.464768	0.929874	0.39057	0.697312	0.472513	0.060594	-0.376963	0.0718489	0.697312	0.049914	0.543236	0.672586	1	0.472513	0.609869	-0.330609	64990500	0.270501	0.0637959	0.162376	9	9	9	32.3	32.3	32.3	43.238	0	107.59	4124300000	1771700000	2352500000	4	4	4	5	5	5	3	2	3
A0A0G2JSR7	A0A0G2JSR7;P43244	Matr3		Matrin-3	0.214536	0.341382	0.198242	-0.437038	-0.447568	0.253955	0.158909	0.368039	0.277959	0.142815	-0.437038	0.396125	0.253955	0.0499327	0.543236	0.260301	1	0.277959	0.770119	-0.228788	NaN	0.104709	0.0896934	0.369856	33	33	33	52.2	52.2	52.2	94.501	0	323.31	216760000000	98970000000	117790000000	22	20	24	25	24	24	21	25	24
A0JPM9	A0JPM9	Eif3j	ENSRNOG00000016459	Eukaryotic translation initiation factor 3 subunit J	-0.377573	-2.00896	0.302616	0.389106	0.647071	-0.210881	-0.469179	-0.298849	-1.19327	0.38173	0.389106	0.0497704	-0.298849	0.049975	0.543236	-0.326303	1	-1.19327	0.609869	0.446265	120517000	0.131319	1.15356	0.1792	9	9	9	39.8	39.8	39.8	29.187	0	65.342	4219200000	1979100000	2240100000	1	3	2	2	1	4	3	1	3
D3ZPY0	D3ZPY0;A0A0G2K2U2	Wtap	ENSRNOG00000019091		0.302025	0.222223	0.131507	-0.299786	-0.110954	0.130638	0.225729	0.309426	0.262124	0.0961686	-0.110954	0.533593	0.225729	0.0501194	0.543568	0.221931	1	0.262124	0.864033	-0.0930777	51782300	0.0894543	0.0564282	0.216201	12	12	12	39.7	39.7	39.7	44.121	0	323.31	4950100000	2395600000	2554400000	5	3	5	5	5	4	5	6	5
Q4V7C1	Q4V7C1	Fgfr1op		FGFR1 oncogene partner	0.444455	NaN	NaN	NaN	NaN	0.832864	0.509544	0.380286	0.444455	1	NaN	1	0.509544	0.0507881	0.549029	0.574231	1	0.444455	1	NaN	NaN	0.23312	NaN	NaN	6	6	6	27.3	27.3	27.3	43.011	0	18.87	161080000	75909000	85176000	1	1	1	0	1	0	1	0	0
P18395	P18395	Csde1	ENSRNOG00000030302	Cold shock domain-containing protein E1	-0.471374	-0.323299	-0.138856	0.629185	0.286154	-0.506847	-0.265374	-0.26281	-0.397337	0.117279	0.286154	0.364118	-0.265374	0.0508531	0.549029	-0.34501	1	-0.397337	0.748327	0.258828	224956000	0.14016	0.104704	0.384749	23	23	23	33.1	33.1	33.1	88.894	0	131.57	4011000000	1932800000	2078100000	4	6	4	5	5	7	5	5	1
F1M470	F1M470;A0A0G2K933;A0A096MK14;A0A0U1RRU1	Eif4e2	ENSRNOG00000019634		0.0478175	-1.3987	-0.175485	0.14482	0.597886	0.580635	0.497025	0.238096	-0.675443	0.521756	0.14482	0.488076	0.497025	0.0510728	0.549985	0.438585	1	-0.675443	0.833321	0.189074	94034100	0.178591	1.02284	0.38858	5	5	5	25.4	25.4	25.4	27.63	0	20.182	593620000	262650000	330970000	2	2	0	1	0	2	1	1	0
G3V9A5	G3V9A5;Q7TQM5	Kprp	ENSRNOG00000028865	Keratinocyte proline-rich protein	NaN	NaN	NaN	NaN	NaN	NaN	-3.11367	-3.66003	NaN	1	NaN	1	-3.38685	0.0512381	0.549985	-3.38685	1	NaN	1	NaN	211735000	0.386334	NaN	NaN	2	2	2	2.7	2.7	2.7	76.412	0.0018797	3.5866	1206300000	1102500000	103760000	0	0	1	1	0	0	1	0	0
A0A0G2JZ48	A0A0G2JZ48;A0A0G2K8G1;A0A0G2JYB3	Tmf1			0.956396	-0.347096	0.734482	0.63559	0.341986	0.239946	0.445903	0.223423	0.30465	0.721632	0.63559	0.0401035	0.239946	0.0514843	0.549985	0.303091	1	0.30465	0.609869	0.570686	NaN	0.123955	0.921708	0.204139	18	18	18	23.8	23.8	23.8	121.9	0	47.289	795070000	357560000	437510000	1	2	1	2	2	2	0	2	1
Q5BJZ4	Q5BJZ4	Surf6	ENSRNOG00000005031		0.687979	1.64315	-0.479406	-0.764298	-0.668942	0.617338	0.76328	1.31535	1.16556	0.247568	-0.668942	0.0168124	0.76328	0.0516521	0.549985	0.898655	1	1.16556	0.609869	-0.637549	10803300	0.36817	0.675407	0.145017	10	10	10	27.1	27.1	27.1	40.831	0	33.529	5288600000	2518600000	2769900000	2	4	2	1	1	2	5	3	3
A0A0G2JVF4	A0A0G2JVF4;A0JPQ7	RGD1307554	ENSRNOG00000018408	Uncharacterized protein C19orf47 homolog	0.899369	2.02663	0.0136267	-0.164691	-0.344917	0.643835	1.56346	1.43543	1.463	0.234106	-0.164691	0.251284	1.43543	0.0517779	0.549985	1.21424	1	1.463	0.672969	-0.165327	85578700	0.498118	0.797094	0.179273	9	9	9	32.2	32.2	32.2	44.553	0	29.148	1266200000	510220000	756000000	1	2	2	3	4	2	3	3	4
B1WC73	B1WC73	Arl6			0.881528	-1.42335	-0.0331905	-0.093434	0.154285	0.583227	0.253784	0.378383	-0.270912	0.853014	-0.0331905	0.912925	0.378383	0.0518618	0.549985	0.405131	1	-0.270912	1	0.00922002	NaN	0.166343	1.6298	0.12919	5	5	5	36.6	36.6	36.6	20.968	0	26.253	3179200000	1241700000	1937500000	1	4	2	2	1	1	2	2	1
D4A5A6	D4A5A6	Polr2a	ENSRNOG00000028834	DNA-directed RNA polymerase	0.222872	0.167025	-0.0502058	-0.322454	-0.233156	0.234154	0.124201	0.118006	0.194948	0.0905706	-0.233156	0.127918	0.124201	0.0520776	0.549985	0.158787	1	0.194948	0.638884	-0.201939	56085100	0.065343	0.0394899	0.138783	58	58	58	42.2	42.2	42.2	217.2	0	323.31	19006000000	8854900000	10151000000	18	17	19	18	19	18	22	26	22
A0A0G2JW88	A0A0G2JW88	Map4			0.670435	-0.445693	0.0586023	0.611779	0.558643	0.58818	0.303812	0.748013	0.112371	0.873503	0.558643	0.145639	0.58818	0.0520902	0.549985	0.546668	1	0.112371	0.641577	0.409675	NaN	0.224991	0.789222	0.305196	28	28	4	21.6	21.6	2.1	233.39	0	172.04	9654300000	4369400000	5284900000	6	6	8	6	8	6	11	6	6
Q5I0L7	Q5I0L7	Kti12		Protein KTI12 homolog	-0.833207	NaN	0.0194884	0.0787963	0.495593	-0.395511	-0.335481	NaN	-0.833207	1	0.0787963	0.317248	-0.365496	0.0521633	0.549985	-0.365496	1	-0.833207	0.720403	0.197959	NaN	0.0424479	NaN	0.259458	5	5	5	31.7	31.7	31.7	38.357	0	21.837	441220000	205400000	235820000	1	0	0	1	0	2	0	0	0
A0A0G2JYN4	A0A0G2JYN4	Larp5			-0.0601794	-1.87678	0.613927	0.417354	0.0505162	-0.513897	-0.207835	-0.424157	-0.968482	0.479594	0.417354	0.160597	-0.424157	0.0521695	0.549985	-0.381963	1	-0.968482	0.64184	0.360599	NaN	0.157333	1.28453	0.285961	5	5	5	18	18	18	42.478	0	63.818	1644300000	667740000	976540000	1	2	3	1	2	4	1	1	0
F6QBA3	F6QBA3	Plin2			NaN	NaN	NaN	-0.325503	-0.937542	0.081067	NaN	0.095587	NaN	1	-0.631523	0.287263	0.088327	0.0522094	0.549985	0.088327	1	NaN	0.697885	-0.631523	NaN	0.0102672	NaN	0.432777	5	5	5	18.8	18.8	18.8	46.184	0	10.809	163260000	80762000	82499000	1	0	0	0	0	0	1	0	0
P70490	P70490;A0A0G2K506;Q1PBJ1	Mfge8	ENSRNOG00000017510	Lactadherin	-1.09012	-0.764459	0.971685	1.01503	0.0368275	-1.14173	-0.481843	-0.778322	-0.927292	0.110662	0.971685	0.168851	-0.778322	0.0523814	0.550582	-0.800633	1	-0.927292	0.642735	0.674513	141814000	0.330511	0.23028	0.552677	19	19	19	56.9	56.9	56.9	47.412	0	188.19	15275000000	7586100000	7688800000	8	10	7	9	8	6	8	7	8
Q4QQS6	Q4QQS6	Alg5	ENSRNOG00000013485		-0.0618196	-0.626024	-0.185222	-0.551281	-0.405802	-0.467959	-0.229233	-0.253138	-0.343922	0.437337	-0.405802	0.0699985	-0.253138	0.0529021	0.554292	-0.316777	1	-0.343922	0.609869	-0.380768	160317000	0.131472	0.398952	0.184309	10	10	10	31.8	31.8	31.8	36.856	0	24.379	2409500000	1171800000	1237700000	3	4	3	3	2	1	5	5	3
Q91ZQ0	Q91ZQ0	Vmp1	ENSRNOG00000003967	Vacuole membrane protein 1	-0.373865	-1.63285	-0.0947227	0.0504668	-0.0712857	-0.564122	-0.312395	-0.767343	-1.00336	0.356707	-0.0712857	0.48226	-0.564122	0.0531111	0.554292	-0.547953	1	-1.00336	0.829015	-0.0385139	76098600	0.227905	0.89024	0.0779455	2	2	2	9.1	9.1	9.1	45.9	0	36.716	2111300000	1018100000	1093200000	2	2	2	2	2	2	2	2	2
P62138	P62138;A0A0G2JYS8	Ppp1ca	ENSRNOG00000018708	Serine/threonine-protein phosphatase PP1-alpha catalytic subunit	0.354351	0.117044	0.0287386	-0.137047	-0.0469712	0.506644	0.252038	0.268173	0.235697	0.296905	-0.0469712	0.393005	0.268173	0.0532519	0.554292	0.342285	1	0.235697	0.769876	-0.0517599	226311000	0.142568	0.167802	0.0829966	19	19	6	69.4	69.4	24.5	37.512	0	323.31	87766000000	39372000000	48394000000	13	13	12	13	13	14	12	13	12
M0R756	M0R756;M0R4R2	Hira	ENSRNOG00000045770;ENSRNOG00000049255		0.38965	1.05184	0.311503	-0.242053	0.137831	0.344723	0.756305	0.860528	0.720743	0.274145	0.137831	0.713615	0.756305	0.0533952	0.554292	0.653852	1	0.720743	0.988837	0.0690937	89086900	0.272738	0.468237	0.283108	15	15	15	22.7	22.7	22.7	111.01	0	41.234	927780000	370570000	557210000	7	6	4	2	6	4	4	2	2
D3ZL57	D3ZL57	Usp6nl	ENSRNOG00000017644		0.758164	-1.29974	-0.0620755	-0.421825	0.0642823	0.529303	0.439688	0.211012	-0.270787	0.836177	-0.0620755	0.43814	0.439688	0.0534314	0.554292	0.393335	1	-0.270787	0.797104	-0.139873	77417400	0.16413	1.45516	0.252219	6	6	6	11.6	11.6	11.6	93.275	0	10.717	510010000	232020000	278000000	1	1	2	2	1	1	0	1	0
D3ZKR9	D3ZKR9	Zcchc6	ENSRNOG00000016629		-0.700591	NaN	-0.815275	-0.590736	1.1046	-0.659221	-0.556754	NaN	-0.700591	1	-0.590736	0.883569	-0.607988	0.0535199	0.554292	-0.607988	1	-0.700591	1	-0.100469	7452320	0.0724552	NaN	1.04965	9	9	9	8.9	8.9	8.9	168.34	0	9.8302	307900000	154080000	153820000	1	0	1	0	1	0	1	0	0
Q8VH49	Q8VH49	Higd1a	ENSRNOG00000019428	HIG1 domain family member 1A, mitochondrial	-0.111159	0.305212	-0.159621	-0.791832	-0.387572	-0.393344	-0.172586	-0.427445	0.0970266	0.722352	-0.387572	0.137112	-0.393344	0.053561	0.554292	-0.331125	1	0.0970266	0.641577	-0.446342	129660000	0.138353	0.294418	0.320177	2	2	2	43	43	43	10.301	0	97.834	655580000	342500000	313070000	1	2	1	1	1	1	1	1	1
D4ABH1	D4ABH1	Scaf11	ENSRNOG00000005263		0.806348	0.704645	0.192904	0.0814141	-0.431065	0.93133	0.703277	0.374226	0.755496	0.0427854	0.0814141	0.811158	0.703277	0.0536637	0.554292	0.669611	1	0.755496	1	-0.0522491	137439000	0.280073	0.0719147	0.332766	15	15	15	15.8	15.8	15.8	160.03	0	277.72	6940400000	3438100000	3502200000	7	7	6	4	6	6	6	4	8
Q6MGC3	Q6MGC3	Wdr46	ENSRNOG00000031171		0.239447	0.559777	-0.334736	-0.595742	-0.328194	0.211064	0.121963	0.298865	0.399612	0.242678	-0.334736	0.0413867	0.211064	0.0540596	0.555038	0.210631	1	0.399612	0.609869	-0.419558	7506470	0.0884515	0.226508	0.152615	19	19	19	41.1	41.1	41.1	67.472	0	197.43	8179900000	3842100000	4337900000	5	11	6	5	5	7	8	11	8
Q4QQU6	Q4QQU6;Q4QQU6-2;A0A096MKB9	Smndc1	ENSRNOG00000014833	Survival of motor neuron-related-splicing factor 30	0.557388	0.455195	-0.127347	-0.474935	-0.454408	0.829038	0.374937	0.48522	0.506291	0.0640332	-0.454408	0.0887901	0.48522	0.0542265	0.555038	0.563065	1	0.506291	0.61309	-0.35223	281510000	0.236848	0.0722618	0.195025	5	5	5	38.2	38.2	38.2	26.783	0	125.11	7884100000	3684600000	4199500000	3	3	3	3	2	3	5	2	3
Q9Z1M9	Q9Z1M9;F1LSS1	Smc1a	ENSRNOG00000003139	Structural maintenance of chromosomes protein;Structural maintenance of chromosomes protein 1A	0.140853	0.18702	0.151182	-0.248889	-0.206505	0.28551	0.121471	0.182946	0.163936	0.0890567	-0.206505	0.508015	0.182946	0.0544163	0.555038	0.196642	1	0.163936	0.84691	-0.101404	21691800	0.0828729	0.0326455	0.21977	50	50	50	48	48	48	143.2	0	323.31	46853000000	22759000000	24094000000	23	24	25	18	27	24	25	28	33
Q6AYG5	Q6AYG5	Echdc1	ENSRNOG00000011622	Ethylmalonyl-CoA decarboxylase	-0.0969463	NaN	-0.0295568	0.166458	0.208846	0.243669	0.205175	NaN	-0.0969463	1	0.166458	0.257094	0.224422	0.0544647	0.555038	0.224422	1	-0.0969463	0.678193	0.115249	32308400	0.0272193	NaN	0.127184	3	3	3	13.7	13.7	13.7	32.63	0	7.5307	405020000	200660000	204360000	1	0	1	1	1	0	0	0	0
Q5D1Z3	Q5D1Z3	Nol12	ENSRNOG00000010209	Nucleolar protein 12	0.6345	1.75024	-0.704646	NaN	-0.465401	0.551412	1.07485	1.39483	1.19237	0.278592	-0.585023	0.128403	1.07485	0.0547413	0.555038	1.00703	1	1.19237	0.638884	-0.585023	120153000	0.425778	0.788944	0.169172	2	2	2	9.7	9.7	9.7	25.185	0	5.9835	690220000	322570000	367650000	1	2	0	1	0	2	1	2	1
D4A022	D4A022	Gapvd1	ENSRNOG00000017925		NaN	-2.2101	0.31487	0.109561	NaN	0.707834	0.595217	NaN	-2.2101	1	0.212216	0.286826	0.651526	0.0548839	0.555038	0.651526	1	-2.2101	0.697885	0.212216	19073600	0.0796323	NaN	0.145176	8	8	8	6.5	6.5	6.5	165.16	0	6.9828	425230000	173440000	251790000	2	1	1	0	0	0	0	0	0
Q8CG09-2	Q8CG09-2;Q8CG09;E9PT28;A0A0G2K5H6	Abcc1	ENSRNOG00000022305	Multidrug resistance-associated protein 1	0.0813759	-0.260235	0.314931	-0.102157	-0.152888	-0.165055	-0.0655316	-0.152263	-0.0894298	0.692939	-0.102157	0.90519	-0.152263	0.0550946	0.555038	-0.127617	1	-0.0894298	1	0.0199621	630057	0.0541462	0.241556	0.256707	24	24	23	23.2	23.2	22.7	170.49	0	153.34	3818500000	1785100000	2033400000	6	9	9	8	7	8	2	3	6
D4A7F2	D4A7F2	Mycbp	ENSRNOG00000017166		0.442262	NaN	0.139224	-0.00476031	0.309015	0.435245	0.344259	0.170694	0.442262	1	0.139224	0.244631	0.344259	0.05511	0.555038	0.316733	1	0.442262	0.669577	0.147826	145349000	0.134406	NaN	0.157065	4	4	4	55.3	55.3	55.3	11.97	0	47.038	3887600000	1669000000	2218600000	2	1	2	1	2	1	0	2	0
D4A1B9	D4A1B9;F1LQB2	Smc3	ENSRNOG00000014173	Structural maintenance of chromosomes protein	0.175461	0.170623	0.0556769	-0.278065	-0.163603	0.349974	0.147583	0.224161	0.173042	0.00890047	-0.163603	0.319313	0.224161	0.0552104	0.555038	0.240572	1	0.173042	0.720403	-0.128664	281720000	0.102189	0.00342159	0.169592	47	47	8	43.3	43.3	6.7	141.54	0	323.31	41242000000	19597000000	21645000000	23	32	24	29	28	34	23	28	29
F1LN59	F1LN59	Eif4g2	ENSRNOG00000017158		-0.0583246	-1.51078	-0.420928	0.108674	0.276523	0.220578	0.0864605	0.194424	-0.784554	0.475435	0.108674	0.95996	0.194424	0.0553437	0.555038	0.167154	1	-0.784554	1	-0.0119105	182868000	0.0710959	1.02704	0.364026	28	28	28	38.5	38.5	38.5	102.11	0	243.85	9792500000	4749100000	5043500000	9	12	10	11	9	10	11	8	7
D3ZQQ2	D3ZQQ2	Wiz	ENSRNOG00000006217		0.584891	0.925368	0.256086	-0.505003	-0.649306	0.354469	0.843001	0.889372	0.755129	0.141162	-0.505003	0.398048	0.843001	0.0555096	0.555038	0.695614	1	0.755129	0.770119	-0.299408	14528700	0.296349	0.240754	0.486452	18	18	18	27.3	27.3	27.3	103.64	0	59.761	2549400000	1140600000	1408800000	3	6	2	3	5	6	4	3	6
Q6AYQ4	Q6AYQ4	Tmem109	ENSRNOG00000028017	Transmembrane protein 109	-0.0903386	-0.317846	0.196481	-0.05183	-0.166932	-0.20586	-0.0887487	-0.22568	-0.204092	0.323708	-0.05183	0.951084	-0.20586	0.0556712	0.555038	-0.17343	1	-0.204092	1	-0.00742693	233991000	0.0740024	0.160872	0.185731	1	1	1	4.9	4.9	4.9	26.242	0	29.44	11714000000	5382300000	6331500000	1	1	1	1	1	1	1	1	1
F1LTU4	F1LTU4	Mrto4	ENSRNOG00000017979		-0.114701	0.216399	-0.0724631	-0.539143	-0.328134	0.0648559	0.139207	0.167082	0.0508493	0.810283	-0.328134	0.145971	0.139207	0.0557787	0.555038	0.123715	1	0.0508493	0.641577	-0.313247	161555000	0.0528448	0.234123	0.233696	12	12	12	66.3	66.3	66.3	22.162	0	59.276	15597000000	7608400000	7988800000	8	7	7	8	7	9	10	9	9
D4A5Q2	D4A5Q2	Smc2	ENSRNOG00000022325	Structural maintenance of chromosomes protein	0.00880432	-0.783123	0.0755942	0.53943	0.267547	0.140453	0.0776086	0.0650206	-0.387159	0.507157	0.267547	0.160347	0.0776086	0.0560434	0.555038	0.0943606	1	-0.387159	0.64184	0.29419	73152100	0.0404101	0.559977	0.233063	29	29	29	29.6	29.6	29.6	134.28	0	134.2	13018000000	6323900000	6693700000	9	12	9	11	11	9	8	9	11
G3V705	G3V705;Q6PCT5	Pqbp1	ENSRNOG00000007766	Polyglutamine-binding protein 1	0.571	1.05802	-0.201262	0.180428	-0.131069	1.02209	0.7498	1.71621	0.814509	0.184942	-0.131069	0.708052	1.02209	0.0561222	0.555038	1.1627	1	0.814509	0.985843	-0.0506342	16128400	0.49831	0.344374	0.20316	5	5	5	29.7	29.7	29.7	30.515	0	51.281	2101800000	912950000	1188900000	2	1	3	3	3	1	3	3	2
D3ZFF4	D3ZFF4	Lclat1	ENSRNOG00000034026		-0.0913593	-1.2571	0.161841	-0.173364	-0.300055	-0.324075	-0.332769	-0.133069	-0.674228	0.453815	-0.173364	0.52966	-0.324075	0.0561442	0.555038	-0.263304	1	-0.674228	0.860585	-0.103859	34278800	0.112871	0.824301	0.238663	3	3	3	11.7	11.7	11.7	44.566	0	10.526	1208000000	620700000	587270000	1	1	1	1	2	2	1	2	1
Q9EPB1	Q9EPB1	Dpp7	ENSRNOG00000012640	Dipeptidyl peptidase 2	0.402045	-0.359707	0.162884	0.549876	0.393879	0.0964124	0.249576	0.208049	0.0211688	0.964653	0.393879	0.0816531	0.208049	0.0562021	0.555038	0.184679	1	0.0211688	0.61309	0.36888	2550550	0.0792111	0.53864	0.194703	10	10	10	33.2	33.2	33.2	55.114	0	110.81	3103200000	1501800000	1601400000	2	2	3	2	1	2	3	2	3
Q9WV25-2	Q9WV25-2;Q9WV25;A0A0H2UHZ6	Puf60	ENSRNOG00000009960	Poly(U)-binding-splicing factor PUF60	0.216476	0.299507	0.0428202	0.21705	0.448405	0.512222	0.216524	0.319408	0.257992	0.101573	0.21705	0.182173	0.319408	0.0563781	0.555038	0.349384	1	0.257992	0.64808	0.236092	117115000	0.150111	0.0587117	0.203462	21	21	21	57	57	57	58.544	0	313.75	19054000000	8473900000	10580000000	12	10	13	15	11	12	12	14	11
A0A0G2K4D9	A0A0G2K4D9;D3ZXT2	Stag2	ENSRNOG00000029885		0.48259	0.206996	0.210739	-0.259528	-0.205342	0.542813	0.457157	0.208727	0.344793	0.242047	-0.205342	0.626033	0.457157	0.056631	0.555038	0.402899	1	0.344793	0.928625	-0.0847101	128584000	0.173526	0.194875	0.257297	31	31	26	34.7	34.7	31.7	145.73	0	114.37	7731800000	3590600000	4141200000	12	10	9	9	11	8	11	10	8
D4A5T8	D4A5T8	Ppl	ENSRNOG00000002930		0.667594	0.197292	0.141122	-0.0307261	0.00573231	0.647874	0.333671	0.316841	0.432443	0.317068	0.00573231	0.536144	0.333671	0.0566597	0.555038	0.432795	1	0.432443	0.864426	0.0387094	9411590	0.186454	0.332553	0.0905458	90	90	90	56.4	56.4	56.4	204.14	0	323.31	111480000000	47607000000	63878000000	33	40	39	41	50	44	41	47	48
P20070	P20070;P20070-2;P20070-3	Cyb5r3	ENSRNOG00000009592	NADH-cytochrome b5 reductase 3;NADH-cytochrome b5 reductase 3 membrane-bound form;NADH-cytochrome b5 reductase 3 soluble form	-0.238244	-0.390884	0.273048	0.386582	-0.163091	-0.340214	-0.252095	-0.132402	-0.314564	0.151529	0.273048	0.427332	-0.252095	0.0568924	0.555038	-0.24157	1	-0.314564	0.789456	0.165513	124007000	0.104305	0.107932	0.290186	20	20	20	78.7	78.7	78.7	34.174	0	323.31	44792000000	20413000000	24379000000	14	14	14	12	13	13	6	8	10
A0A140TAI9	A0A140TAI9;Q6PDU4	Leprotl1	ENSRNOG00000012601	Leptin receptor overlapping transcript-like 1	-1.49773	-1.15977	0.115699	NaN	-0.479553	-1.05417	-0.877049	-1.91219	-1.32875	0.080528	-0.181927	0.650714	-1.05417	0.0569812	0.555038	-1.28113	1	-1.32875	0.945904	-0.181927	61424700	0.553636	0.238974	0.420907	1	1	1	10	10	10	14.214	0.00022371	5.1087	366540000	216140000	150400000	1	1	0	1	0	1	1	1	1
Q5M9H7	Q5M9H7;O35824	Dnaja2	ENSRNOG00000016251	DnaJ homolog subfamily A member 2	-0.186577	-0.992786	-0.222795	0.0703497	0.290396	-0.0695097	-0.174191	-0.119676	-0.589681	0.381738	0.0703497	0.786309	-0.119676	0.0570051	0.555038	-0.121125	1	-0.589681	1	0.0459835	33576400	0.0523557	0.570076	0.257462	15	15	15	55.6	55.6	55.6	45.745	0	243.07	12731000000	6083600000	6647700000	5	3	6	5	5	6	4	6	6
Q9Z1Z9	Q9Z1Z9	Pdlim7	ENSRNOG00000013653	PDZ and LIM domain protein 7	0.340504	-0.22379	-0.155743	0.184725	0.0711748	0.138853	0.14511	0.0569015	0.0583573	0.870157	0.0711748	0.770427	0.138853	0.0572356	0.555038	0.113622	1	0.0583573	1	0.0333855	11762300	0.0492205	0.399016	0.173351	8	8	8	27.6	27.6	27.6	49.912	0	16.844	995700000	433550000	562140000	2	2	2	1	1	3	3	2	1
B5DEL2	B5DEL2;D4A0H5	Cpsf1	ENSRNOG00000030705		0.255619	0.194101	0.0769349	-0.265124	-0.148232	0.302951	0.17514	0.133278	0.22486	0.0865471	-0.148232	0.380123	0.17514	0.0573652	0.555038	0.20379	1	0.22486	0.762357	-0.11214	117650000	0.0883903	0.0434997	0.173862	38	38	38	36.8	36.8	36.8	160.75	0	283.67	12521000000	5941800000	6578900000	15	18	15	15	17	14	15	14	17
Q5XIF5	Q5XIF5	Degs1	ENSRNOG00000003223	Sphingolipid delta(4)-desaturase DES1	-0.450526	1.25749	0.361854	-0.106344	-0.580844	-0.56638	-0.235807	-0.355295	0.403484	0.719014	-0.106344	0.728783	-0.355295	0.057392	0.555038	-0.385827	1	0.403484	0.999067	-0.108445	105600000	0.167389	1.20775	0.471353	3	3	3	14.9	14.9	14.9	38.055	0	51.504	1932000000	914640000	1017300000	3	1	3	0	2	1	1	0	1
D3ZLP9	D3ZLP9	Sap130	ENSRNOG00000016773		0.258689	1.90531	0.319384	-0.0606285	-0.158969	0.346209	0.477918	0.803479	1.082	0.41409	-0.0606285	0.840796	0.477918	0.0573959	0.555038	0.542535	1	1.082	1	0.0332623	24138900	0.235384	1.16434	0.25262	10	10	10	13.1	13.1	13.1	112.64	0	25.267	3055700000	1489300000	1566300000	1	2	2	2	2	1	2	3	1
A0A0G2JSY8	A0A0G2JSY8;P24898	Junb		Transcription factor jun-B	0.63261	1.22733	0.292419	0.745521	0.0669501	0.597266	1.56746	1.30867	0.929972	0.197021	0.292419	0.206199	1.30867	0.0574094	0.555038	1.1578	1	0.929972	0.661721	0.368297	NaN	0.502386	0.420533	0.34559	9	9	9	44.5	44.5	44.5	35.795	0	204.61	3428500000	1340400000	2088000000	5	3	4	2	3	2	6	4	5
Q5PQR4	Q5PQR4;A0A0G2JZB4	Rsrc2	ENSRNOG00000001238	Arginine/serine-rich coiled-coil protein 2	0.650418	NaN	-0.165992	0.454071	0.748032	0.915336	0.963252	1.88006	0.650418	1	0.454071	0.328369	0.963252	0.0574161	0.555038	1.25288	1	0.650418	0.72296	0.34537	40146900	0.543679	NaN	0.466607	3	3	3	13.3	13.3	13.3	43.89	0	48.738	109530000	41884000	67650000	1	1	1	0	1	1	2	0	0
D3ZR35	D3ZR35	Smim13	ENSRNOG00000043288	Small integral membrane protein 13	-0.689776	-1.5985	-0.222228	-0.529321	-0.366913	-0.683077	-0.818914	NaN	-1.14414	0.240657	-0.366913	0.0522098	-0.750995	0.0574184	0.555038	-0.750995	1	-1.14414	0.609869	-0.372821	23323000	0.0960513	0.642565	0.153632	1	1	1	35.2	35.2	35.2	9.9953	0	17.397	823300000	414450000	408860000	1	1	1	1	0	1	0	0	1
Q3T1G7	Q3T1G7	Cog7	ENSRNOG00000018751	Conserved oligomeric Golgi complex subunit 7	NaN	NaN	NaN	NaN	-0.023783	0.909504	1.09099	NaN	NaN	1	-0.023783	1	1.00025	0.0575964	0.555038	1.00025	1	NaN	1	-0.023783	198859000	0.128329	NaN	NaN	7	7	7	14.2	14.2	14.2	86.211	0	13.521	228150000	91611000	136540000	0	1	1	0	0	0	0	0	0
Q5FVL3	Q5FVL3	Fam69b	ENSRNOG00000004532	Protein FAM69B	-0.140937	-0.92533	NaN	-0.0894515	-0.312635	-0.898706	-1.07828	NaN	-0.533134	0.403776	-0.201043	0.322589	-0.988493	0.057667	0.555038	-0.988493	1	-0.533134	0.720403	-0.201043	9442980	0.126977	0.55465	0.157814	3	3	3	11.4	11.4	11.4	48.837	0.00043792	4.4978	202360000	115400000	86966000	2	1	1	1	0	1	1	0	1
M0RDU8	M0RDU8;Q6P7B9;D4ABJ9;P07308;Z4YNJ9	Scd2	ENSRNOG00000013279;ENSRNOG00000013552;ENSRNOG00000032554;ENSRNOG00000046005	Acyl-CoA desaturase 1;Acyl-CoA desaturase 2	0.0519185	-0.731552	NaN	NaN	-0.398782	-0.3886	-0.332666	-0.147586	-0.339817	0.545106	-0.398782	1	-0.332666	0.0578057	0.555038	-0.289617	1	-0.339817	1	-0.398782	271520000	0.126143	0.553997	NaN	3	3	3	14.2	14.2	14.2	41.027	0.00064921	4.299	3289200000	1739600000	1549700000	1	1	1	1	1	1	0	1	1
B1H2A6	B1H2A6	Fxr2	ENSRNOG00000011876		-0.190717	-1.26911	0.538048	0.603535	0.503236	0.0997076	0.164936	0.248276	-0.729915	0.405042	0.538048	0.00286338	0.164936	0.0578067	0.555038	0.170973	1	-0.729915	0.609869	0.548273	55983500	0.0744678	0.762541	0.0509251	8	6	5	18.1	15.7	12.9	74.374	0	40.656	1294100000	576510000	717600000	4	4	4	3	2	3	5	3	3
Q9ES40	Q9ES40;A0A0H2UHF6	Arl6ip5	ENSRNOG00000006818	PRA1 family protein 3	-0.343056	0.100626	0.166987	0.0337142	-0.560527	-0.626516	-0.238579	-0.483025	-0.121215	0.681641	0.0337142	0.64539	-0.483025	0.0580336	0.556097	-0.449373	1	-0.121215	0.941605	-0.119942	194078000	0.196145	0.31373	0.387333	5	5	5	25	25	25	21.548	0	45.091	5431900000	2551000000	2881000000	4	3	3	4	3	4	2	3	2
M0R3V4	M0R3V4	Mydgf	ENSRNOG00000046883		-0.866647	0.619577	0.619194	0.196306	-0.347729	-0.331641	-0.548923	-0.230695	-0.123535	0.895127	0.196306	0.633452	-0.331641	0.0586498	0.560875	-0.37042	1	-0.123535	0.932973	0.155924	9874670	0.16262	1.05092	0.484725	4	4	4	31.3	31.3	31.3	17.952	0	18.774	3416200000	1378700000	2037500000	3	1	2	0	0	2	1	2	1
C0JPT7	C0JPT7	Flna	ENSRNOG00000037239		0.554159	0.304714	-0.163624	0.032281	0.20414	0.477822	0.317064	0.189035	0.429436	0.179945	0.032281	0.840558	0.317064	0.059184	0.564633	0.327974	1	0.429436	1	0.0242659	152204000	0.144702	0.176384	0.184013	118	118	112	65.1	65.1	63.3	280.49	0	323.31	551780000000	251000000000	300780000000	83	86	84	81	82	82	69	76	72
D3ZGJ0	D3ZGJ0	Dhx32	ENSRNOG00000018119		0.253263	NaN	0.11693	1.41982	0.687768	0.453649	0.547105	NaN	0.253263	1	0.687768	0.188141	0.500377	0.0592794	0.564633	0.500377	1	0.253263	0.64896	0.741506	212739000	0.0660836	NaN	0.653105	5	5	5	10.4	10.4	10.4	84.838	0	12.495	350630000	147800000	202820000	1	1	2	1	1	0	0	0	0
B5DEI6	B5DEI6	C1d	ENSRNOG00000005982		0.958434	0.964731	NaN	NaN	NaN	NaN	0.864255	0.716245	0.961583	0.00208443	NaN	1	0.79025	0.0594449	0.564734	0.79025	1	0.961583	1	NaN	100112000	0.104659	0.00445256	NaN	1	1	1	22.7	22.7	22.7	16	0	25.499	113990000	25218000	88768000	0	0	1	0	1	0	1	0	1
D3Z8F1	D3Z8F1	Vill	ENSRNOG00000011446	Villin-like protein	-0.36269	0.112233	0.614912	0.791411	0.59006	0.495797	0.477581	0.189855	-0.125229	0.691049	0.614912	0.0089502	0.477581	0.0595295	0.564734	0.387745	1	-0.125229	0.609869	0.665461	126957000	0.171619	0.335821	0.109782	19	19	19	30.5	30.5	30.5	96.322	0	129.51	3013000000	1279300000	1733600000	4	0	1	2	4	3	3	1	2
D4A8A0	D4A8A0	Cad	ENSRNOG00000026474		-0.531382	-1.68103	-0.264782	0.370496	0.503224	-0.340784	-0.323374	-0.129589	-1.1062	0.305089	0.370496	0.481981	-0.323374	0.0596451	0.564734	-0.264582	1	-1.1062	0.828834	0.20298	36472500	0.117231	0.812922	0.410493	77	77	75	52	52	51.3	243.37	0	323.31	32619000000	16078000000	16541000000	27	21	25	22	27	26	14	16	14
A0A0G2QC59	A0A0G2QC59	Spout1			-0.395743	0.191853	-0.581754	-1.57846	-0.930149	-0.159032	-0.326398	-0.425507	-0.101945	0.787375	-0.930149	0.0718192	-0.326398	0.0597645	0.564745	-0.303646	1	-0.101945	0.609869	-1.03012	NaN	0.134687	0.415493	0.50582	8	8	8	27.9	27.9	27.9	41.971	0	47.56	3681900000	1933200000	1748700000	4	4	4	4	5	4	2	2	5
A0A0G2JSJ8	A0A0G2JSJ8;P17164	Fuca1		Tissue alpha-L-fucosidase	-0.911922	-0.714289	0.623386	0.591611	0.0982153	-0.897831	-0.434643	-0.447821	-0.813106	0.0769907	0.591611	0.123508	-0.447821	0.0599609	0.565481	-0.593432	1	-0.813106	0.638884	0.437738	NaN	0.2637	0.139748	0.294464	10	10	10	29.4	29.4	29.4	53.472	0	123.91	6984000000	3087200000	3896900000	4	6	2	3	3	3	5	3	2
G3V6H2	G3V6H2	Prpf8	ENSRNOG00000003495		0.0230904	0.11026	-0.00185921	-0.383538	-0.298083	0.185008	0.0702108	0.17747	0.0666751	0.368579	-0.298083	0.187642	0.17747	0.0601698	0.565492	0.14423	1	0.0666751	0.64896	-0.227827	64348600	0.0642128	0.061638	0.200304	116	116	116	61.5	61.5	61.5	273.61	0	323.31	314600000000	150170000000	164430000000	78	74	67	67	69	72	64	70	68
D4A6Q6	D4A6Q6	Ino80	ENSRNOG00000014483		0.0483758	NaN	-0.155582	-0.489544	NaN	0.148302	0.256529	0.381616	0.0483758	1	-0.322563	0.304102	0.256529	0.0602136	0.565492	0.262149	1	0.0483758	0.71557	-0.322563	117739000	0.116758	NaN	0.236147	5	5	5	4.5	4.5	4.5	176.64	0	22.546	294770000	127640000	167120000	1	1	3	1	1	1	0	1	1
D3ZKB7	D3ZKB7;A0A0G2KAM8	Vprbp	ENSRNOG00000013841		0.504402	0.624522	-0.204874	0.196437	-0.130366	0.172435	0.467677	0.374288	0.564462	0.0674839	-0.130366	0.743427	0.374288	0.060435	0.565492	0.338133	1	0.564462	1	-0.0462677	114907000	0.150905	0.0849378	0.213465	14	14	14	13.5	13.5	13.5	155.46	0	28.456	639040000	278350000	360690000	1	6	1	2	2	1	0	1	0
D3ZQM0	D3ZQM0	Sf3a1	ENSRNOG00000005218		0.259399	0.984183	0.0222515	-0.332916	-0.233091	0.555333	0.322559	0.830699	0.621791	0.335939	-0.233091	0.22868	0.555333	0.0605184	0.565492	0.56953	1	0.621791	0.668431	-0.181252	85074800	0.254367	0.5125	0.183171	31	31	31	43.2	43.2	43.2	88.587	0	323.31	80398000000	36296000000	44102000000	18	19	16	20	18	18	20	21	25
A0A0G2QC38	A0A0G2QC38	Srsf11			0.366126	0.382147	-0.196422	0.513867	0.704342	0.545742	0.467366	1.02966	0.374137	0.0136286	0.513867	0.339919	0.545742	0.0606737	0.565492	0.680922	1	0.374137	0.731002	0.340595	NaN	0.304545	0.0113288	0.474722	6	6	6	17	17	17	56.66	0	35.319	4608300000	1898500000	2709800000	6	4	5	4	4	5	3	3	2
Q4V8I7	Q4V8I7	Lrrc8a	ENSRNOG00000025296	Volume-regulated anion channel subunit LRRC8A	-0.291432	-0.273517	-0.440946	0.451937	-0.609971	-0.0442257	-0.0918491	-0.119783	-0.282475	0.0201809	-0.440946	0.606091	-0.0918491	0.0608453	0.565492	-0.0852858	1	-0.282475	0.915853	-0.19966	14155800	0.0382036	0.0126678	0.570593	10	10	10	15.4	15.4	15.4	94.161	0	19.109	1235400000	569510000	665860000	3	2	4	4	4	4	2	1	0
Q9EST6	Q9EST6;F1LP34	Anp32b	ENSRNOG00000009266	Acidic leucine-rich nuclear phosphoprotein 32 family member B	-0.447252	-2.31647	-0.108897	0.430685	0.609573	-0.189369	-0.0752125	-0.201093	-1.38186	0.378579	0.430685	0.287099	-0.189369	0.0608573	0.565492	-0.155225	1	-1.38186	0.697885	0.310454	66591100	0.0695403	1.32174	0.37402	7	7	6	30.5	30.5	27.6	31.06	0	323.31	38160000000	18167000000	19993000000	4	4	5	5	4	5	4	4	2
Q8CHN6	Q8CHN6	Sgpl1	ENSRNOG00000000565	Sphingosine-1-phosphate lyase 1	-0.237916	-0.400592	-0.369075	-0.277313	-0.296825	-0.292017	-0.193648	-0.113302	-0.319254	0.158817	-0.296825	0.00778813	-0.193648	0.060936	0.565492	-0.199656	1	-0.319254	0.609869	-0.314404	32497300	0.0895087	0.11503	0.0483408	14	14	14	29.6	29.6	29.6	63.758	0	98.879	14179000000	7137200000	7041600000	8	8	6	6	7	7	8	9	6
Q63707	Q63707	Dhodh	ENSRNOG00000015063	Dihydroorotate dehydrogenase (quinone), mitochondrial	-0.332224	-0.822325	-0.119469	-0.641806	-0.458049	-0.3281	-0.439559	-0.162929	-0.577274	0.255566	-0.458049	0.117263	-0.3281	0.0610286	0.565492	-0.310196	1	-0.577274	0.638884	-0.406441	52891900	0.139181	0.346553	0.264965	5	5	5	16.5	16.5	16.5	42.662	0	12.612	481390000	275700000	205690000	2	2	0	2	1	2	0	2	1
Q1EG89	Q1EG89;Q66H76;A0A0G2JY12	Pxn	ENSRNOG00000001149	Paxillin	0.129601	-1.37992	0.568939	0.409038	0.38927	0.516177	0.221586	0.288706	-0.625159	0.559616	0.409038	0.0152227	0.288706	0.0616634	0.568293	0.342156	1	-0.625159	0.609869	0.455749	48595400	0.154397	1.06739	0.0985225	18	18	18	52.2	52.2	52.2	60.915	0	166.23	4910500000	2321700000	2588800000	5	3	7	4	5	5	4	3	4
D3ZLS5	D3ZLS5	Hectd1	ENSRNOG00000006905		NaN	-1.81731	-0.192406	0.970486	0.213556	-0.411522	-0.295695	-0.70881	-1.81731	1	0.213556	0.434357	-0.411522	0.0617178	0.568293	-0.472009	1	-1.81731	0.793247	0.330545	82073600	0.213096	NaN	0.590207	9	9	9	6.1	6.1	6.1	289.03	0	32.226	241050000	118730000	122320000	0	1	0	1	0	0	1	2	1
B0BMY5	B0BMY5	Chchd5			0.219618	1.35659	0.596025	0.665064	0.189714	-0.104542	-0.263438	-0.28502	0.788106	0.397825	0.596025	0.0825493	-0.263438	0.0620517	0.568293	-0.217667	1	0.788106	0.61309	0.483601	NaN	0.0985615	0.803964	0.256844	4	4	4	39.1	39.1	39.1	12.323	0	28.387	1206400000	436740000	769660000	0	1	1	0	1	1	1	0	1
D3ZWI0	D3ZWI0	Cemip	ENSRNOG00000012442		NaN	NaN	NaN	-1.64772	NaN	0.610511	0.501677	NaN	NaN	1	-1.64772	1	0.556094	0.0620992	0.568293	0.556094	1	NaN	1	-1.64772	147001000	0.0769573	NaN	NaN	3	3	3	2.1	2.1	2.1	160.32	0.00022604	5.3896	431900000	324750000	107150000	1	0	1	1	0	0	0	0	0
A0A0G2K059	A0A0G2K059;M0RDI5	Mcu	ENSRNOG00000045920		-0.478293	-0.741635	0.248319	0.428859	0.145415	-0.442544	-0.280875	-0.17342	-0.609964	0.135348	0.248319	0.0804188	-0.280875	0.062138	0.568293	-0.298946	1	-0.609964	0.61309	0.274197	30842400	0.135469	0.186211	0.143483	12	12	12	43.2	43.2	43.2	36.057	0	273.39	34417000000	14850000000	19567000000	7	7	7	8	8	6	5	6	6
Q99ML5	Q99ML5	Pcyox1	ENSRNOG00000016704	Prenylcysteine oxidase	-0.287745	-0.416617	0.349366	-0.00238645	-0.0552116	-0.361149	-0.277349	-0.130978	-0.352181	0.115204	-0.00238645	0.523756	-0.277349	0.0623941	0.568293	-0.256492	1	-0.352181	0.857396	0.097256	182758000	0.116494	0.0911264	0.219925	17	17	17	55.6	55.6	55.6	56.287	0	194.26	13739000000	6753000000	6986200000	11	9	9	11	10	6	7	9	6
Q63151	Q63151;Q63151-2	Acsl3	ENSRNOG00000014718	Long-chain-fatty-acid--CoA ligase 3	-0.152411	-0.867373	0.575863	0.43373	-0.234188	-0.139356	-0.290508	-0.14177	-0.509892	0.389267	0.43373	0.409403	-0.14177	0.0624428	0.568293	-0.190545	1	-0.509892	0.777426	0.258468	84327500	0.0865791	0.505555	0.432531	25	24	24	47.9	46.4	46.4	80.457	0	201.66	19351000000	8683400000	10667000000	7	10	13	15	12	15	12	9	12
A0A0G2K7N8	A0A0G2K7N8;B1H2A3	Bptf	ENSRNOG00000047296		0.106776	0.224237	0.208717	-0.607846	-0.521876	0.256551	0.174959	0.430683	0.165507	0.217083	-0.521876	0.35771	0.256551	0.0624741	0.568293	0.287397	1	0.165507	0.74476	-0.307002	94990600	0.130623	0.0830579	0.448689	37	37	37	19.3	19.3	19.3	304.34	0	154.64	6927800000	3835300000	3092500000	9	10	11	10	9	9	10	6	11
B2GUV5	B2GUV5;A0A0G2KAG3;A0A0G2K2R1;Q8R2H0	Atp6v1g1	ENSRNOG00000000840;ENSRNOG00000008163		-0.933779	-1.61145	-0.0435292	0.473216	0.2869	-0.418539	-0.763761	-0.330079	-1.27262	0.165658	0.2869	0.254695	-0.418539	0.0624902	0.568293	-0.504126	1	-1.27262	0.674455	0.238862	45191800	0.229159	0.479188	0.261701	6	6	6	61	61	61	13.71	0	98.221	3372200000	1557000000	1815200000	3	3	2	3	2	4	2	1	2
Q568Y6	Q568Y6	Dmap1	ENSRNOG00000019407		0.397982	0.314694	-0.156304	-0.235946	-0.357824	0.213687	0.134073	0.341268	0.356338	0.0740635	-0.235946	0.0507811	0.213687	0.0626161	0.568293	0.229676	1	0.356338	0.609869	-0.250025	140323000	0.104519	0.0588934	0.101495	10	10	10	30.6	30.6	30.6	53.173	0	29.368	1979000000	1314700000	664310000	1	5	2	3	2	3	3	5	5
Q6P6S4	Q6P6S4	Sil1	ENSRNOG00000019826	Nucleotide exchange factor SIL1	0.145168	-0.438272	0.456118	0.851102	0.301022	0.208798	0.307428	0.115699	-0.146552	0.703626	0.456118	0.0819927	0.208798	0.0626409	0.568293	0.210642	1	-0.146552	0.61309	0.536081	27777600	0.0958779	0.412555	0.283624	13	13	13	40	40	40	52.349	0	59.578	1873400000	668530000	1204900000	4	4	1	0	1	1	0	2	2
P07340	P07340;A0A096MJI9	Atp1b1	ENSRNOG00000002934	Sodium/potassium-transporting ATPase subunit beta-1	0.301651	0.491802	NaN	-0.508978	-1.70247	0.154363	0.164693	0.059909	0.396726	0.149742	-1.10572	0.315058	0.154363	0.0631335	0.568961	0.126322	1	0.396726	0.720403	-1.10572	87621400	0.0577465	0.134457	0.843925	7	7	7	31.9	31.9	31.9	35.201	0	15.656	1387300000	643020000	744280000	2	2	2	4	3	3	1	0	0
P63219	P63219	Gng5	ENSRNOG00000015936;ENSRNOG00000038205;ENSRNOG00000039562	Guanine nucleotide-binding protein G(I)/G(S)/G(O) subunit gamma-5;Guanine nucleotide-binding protein subunit gamma	-1.73182	-1.42849	-0.467876	-0.334693	-0.786848	-0.324155	-0.895879	-0.659039	-1.58015	0.0609172	-0.467876	0.0585391	-0.659039	0.0635049	0.568961	-0.626358	1	-1.58015	0.609869	-0.529806	79793300	0.287259	0.214488	0.232352	3	3	3	68.7	68.7	68.7	7.1872	0	49.452	7162100000	3444900000	3717200000	1	2	1	1	1	1	0	1	1
Q6AY02	Q6AY02	Rbm17	ENSRNOG00000018767		0.992593	0.456428	0.0640372	0.0798387	-0.154147	1.46439	0.980628	0.549357	0.724511	0.225616	0.0640372	0.96795	0.980628	0.0635074	0.568961	0.998126	1	0.724511	1	-0.00342377	72289000	0.45777	0.379126	0.130769	14	14	14	49.9	49.9	49.9	45.347	0	175.85	11715000000	4536600000	7178600000	4	4	7	6	5	7	7	7	9
B1H269	B1H269	Ddx27	ENSRNOG00000008081		0.109773	0.50645	-0.324481	-0.743447	-0.512112	0.086774	0.239803	0.224191	0.308111	0.364115	-0.512112	0.0490621	0.224191	0.0635179	0.568961	0.183589	1	0.308111	0.609869	-0.52668	169928000	0.084207	0.280493	0.209863	27	27	27	36.7	36.7	36.7	85.973	0	316.68	36493000000	17585000000	18907000000	18	21	17	17	20	15	18	23	20
A0A1B0GWP1	A0A1B0GWP1;A0A0G2K8N7;Q5U2Z8	Elovl1	ENSRNOG00000028448	Elongation of very long chain fatty acids protein	0.372614	1.99468	0.342671	0.202304	-0.391033	0.848891	1.10925	0.397245	1.18365	0.382432	0.202304	0.840692	0.848891	0.0635641	0.568961	0.785129	1	1.18365	1	0.0513141	141047000	0.36026	1.14697	0.38946	3	3	3	20.3	20.3	20.3	20.575	0	39.906	3184300000	1609100000	1575200000	2	2	2	1	2	2	2	2	2
O08837	O08837	Cdc5l	ENSRNOG00000019975	Cell division cycle 5-like protein	0.385766	0.559955	0.0869656	-0.178544	-0.234005	0.647314	0.400014	1.03167	0.472861	0.115957	-0.178544	0.38754	0.647314	0.0636769	0.568961	0.693	1	0.472861	0.768237	-0.108528	16838200	0.318297	0.12317	0.171558	32	32	32	56.9	56.9	56.9	92.216	0	323.31	45948000000	20985000000	24964000000	20	20	21	19	18	20	16	17	20
Q32KJ5	Q32KJ5;F7EQ81	Gns	ENSRNOG00000047350		-0.0893881	-0.824499	-0.142283	-0.000345722	-0.0761373	-0.220177	-0.583151	-0.383601	-0.456944	0.431249	-0.0761373	0.217315	-0.383601	0.0637188	0.568961	-0.395643	1	-0.456944	0.667493	-0.0729219	63691000	0.181786	0.519802	0.071023	14	14	14	37.7	37.7	37.7	60.913	0	47.946	4464000000	2139900000	2324000000	1	2	2	3	1	3	4	5	7
G3V8T9	G3V8T9;Q9JKL3;Q63690	Bax	ENSRNOG00000020876	Apoptosis regulator BAX	-0.595222	-0.700891	-0.251057	0.56227	0.472215	-0.158361	-0.446842	-0.380989	-0.648057	0.0517877	0.472215	0.417117	-0.380989	0.0638196	0.568961	-0.328731	1	-0.648057	0.783347	0.261143	102531000	0.151174	0.0747196	0.445858	6	6	6	46.4	46.4	46.4	21.444	0	71.568	3531200000	1869100000	1662100000	2	4	4	3	3	3	5	4	2
Q6AYD5	Q6AYD5;A0A096MJE3	Gspt1	ENSRNOG00000002335;ENSRNOG00000046271;ENSRNOG00000048817		-0.312902	-0.776279	0.249816	0.488424	0.64382	-0.469272	-0.429137	-0.167912	-0.544591	0.256074	0.488424	0.0566551	-0.429137	0.0639488	0.568961	-0.35544	1	-0.544591	0.609869	0.460686	3277700	0.163639	0.327657	0.198461	20	20	20	36.5	36.5	36.5	68.751	0	152.8	9628500000	4540100000	5088400000	5	2	7	4	4	4	3	7	4
B4F7B2	B4F7B2	Taf10	ENSRNOG00000019178		0.54782	0.958434	0.0462715	-0.0867521	-0.0207919	1.18261	0.530426	0.608147	0.753127	0.16943	-0.0207919	0.647986	0.608147	0.0639543	0.568961	0.773728	1	0.753127	0.94329	-0.0204242	177591000	0.356229	0.290348	0.0665126	5	5	5	34.9	34.9	34.9	21.778	0	180.6	2806400000	1246300000	1560100000	1	3	1	1	3	2	2	1	2
Q56A18-3	Q56A18-3;E9PU44;Q56A18;Q56A18-4;A0A0G2K9C1;A0A0G2KAP8;Q56A18-2	Smarce1	ENSRNOG00000010676	SWI/SNF-related matrix-associated actin-dependent regulator of chromatin subfamily E member 1	0.151476	0.375994	0.0958594	-0.304309	0.0192462	0.365286	0.234495	0.139235	0.263735	0.256189	0.0192462	0.658241	0.234495	0.0640303	0.568961	0.246339	1	0.263735	0.952433	-0.0630677	86913900	0.11349	0.158758	0.212404	14	14	13	45.5	45.5	43.4	39.255	0	173.99	10205000000	5091500000	5113000000	5	5	8	6	5	8	8	4	9
Q5RKJ9	Q5RKJ9;P35281	Rab10	ENSRNOG00000047088	Ras-related protein Rab-10	-0.0165913	-0.423813	0.299244	0.148818	-0.142864	-0.105975	-0.104646	-0.219944	-0.220202	0.47509	0.148818	0.515198	-0.105975	0.0641453	0.568961	-0.143522	1	-0.220202	0.850476	0.101733	37479100	0.0661872	0.287949	0.224784	9	9	8	38	38	32.5	22.541	0	101.8	58689000000	26943000000	31746000000	5	7	5	5	6	7	5	6	4
D3ZUQ2	D3ZUQ2;Q4V8K3;M0R635;A0JPQ5	Naa10	ENSRNOG00000002031;ENSRNOG00000029373;ENSRNOG00000046108	N-alpha-acetyltransferase 11	-0.579231	-2.22961	-0.48476	-0.341501	0.247358	-0.59684	-0.900406	-0.336538	-1.40442	0.338189	-0.341501	0.479795	-0.59684	0.0642766	0.569069	-0.611261	1	-1.40442	0.827549	-0.192967	13771600	0.282211	1.16699	0.388002	9	9	9	49.4	49.4	49.4	26.611	0	19.941	3533600000	1702300000	1831300000	1	1	1	2	1	3	1	1	2
A0A0G2JTX9	A0A0G2JTX9	Derl2			NaN	NaN	-0.0148931	-0.0790363	-0.63259	0.0935853	0.114817	NaN	NaN	1	-0.0790363	0.342218	0.104201	0.0646334	0.569527	0.104201	1	NaN	0.732315	-0.242173	NaN	0.0150127	NaN	0.339629	1	1	1	12.6	12.6	12.6	27.639	0	17.185	476780000	245630000	231140000	1	1	1	1	0	0	0	0	0
D3ZTL3	D3ZTL3;D4A779;A0A1W2Q667;A0A1W2Q6E5	Phldb2	ENSRNOG00000002171		1.04961	0.212565	0.662355	0.550728	0.435088	1.0864	1.07591	0.396497	0.631085	0.372793	0.550728	0.0139638	1.07591	0.0647308	0.569527	0.852935	1	0.631085	0.609869	0.54939	60566700	0.395322	0.591877	0.113639	19	19	19	21.1	21.1	21.1	141.77	0	55.764	2000100000	835400000	1164700000	5	5	6	4	5	4	3	1	5
D3ZD89	D3ZD89	Naa15	ENSRNOG00000012385		-0.258399	-1.48815	-0.00562871	0.566292	0.527277	-0.257744	-0.694815	-0.461144	-0.873273	0.39055	0.527277	0.188244	-0.461144	0.0648921	0.569527	-0.471234	1	-0.873273	0.64896	0.362647	159947000	0.21871	0.869563	0.319532	31	31	29	46.9	46.9	44.7	101.01	0	78.616	6994200000	3412800000	3581400000	5	4	7	6	6	9	1	6	2
Q6AXN3	Q6AXN3;Q6QI88	Tmed5	ENSRNOG00000000073	Transmembrane emp24 domain-containing protein 5	-0.169988	-0.393104	-0.0753446	-0.0942574	-0.346797	-0.197406	-0.0894387	-0.099098	-0.281546	0.240168	-0.0942574	0.188044	-0.099098	0.0649586	0.569527	-0.128647	1	-0.281546	0.64896	-0.172133	2612360	0.059742	0.157766	0.151558	5	5	5	21.4	21.4	21.4	26.136	0	41.282	6333600000	3001800000	3331700000	2	2	2	3	3	3	3	3	2
Q6IRJ7	Q6IRJ7	Anxa7	ENSRNOG00000007136	Annexin	-0.309633	-1.28788	-0.343988	-0.0118636	0.423715	-0.236744	-0.35354	-0.597045	-0.798755	0.349794	-0.0118636	0.928226	-0.35354	0.0649801	0.569527	-0.395776	1	-0.798755	1	0.0226212	8355760	0.183826	0.691723	0.385012	13	13	13	29.4	29.4	29.4	50.019	0	194.59	10708000000	5612100000	5096100000	6	6	5	7	5	5	5	4	4
P23899-2	P23899-2;P23899;A0A096MJ72;P15257	Hnf1b	ENSRNOG00000001183;ENSRNOG00000002598	Hepatocyte nuclear factor 1-alpha;Hepatocyte nuclear factor 1-beta	NaN	NaN	0.513712	0.754798	-0.489261	0.463934	0.856069	0.362554	NaN	1	0.513712	0.565673	0.463934	0.0650445	0.569527	0.560853	1	NaN	0.887281	0.25975	59990200	0.260642	NaN	0.659768	3	3	2	7.7	7.7	6.2	58.426	0	22.838	170840000	59455000	111390000	1	3	0	2	0	0	1	0	0
A0A0G2JSW0	A0A0G2JSW0;P18666;B0BMS8;Q64122	Myl12b	ENSRNOG00000020246	Myosin regulatory light chain 12B;Myosin regulatory light polypeptide 9	-0.330345	-1.75215	-0.293087	0.0948677	0.0239543	-0.22809	-0.203409	-0.452624	-1.04124	0.381366	0.0239543	0.674382	-0.22809	0.0653518	0.570723	-0.294708	1	-1.04124	0.962705	-0.0580883	158833000	0.137315	1.00536	0.20658	9	2	2	62.8	22.1	22.1	19.779	0	24.358	2667900000	1268700000	1399200000	6	6	7	7	7	7	7	6	7
Q498U4	Q498U4	Sarnp	ENSRNOG00000030520	SAP domain-containing ribonucleoprotein	0.823157	3.39724	0.126229	0.325284	0.189217	1.86286	0.91011	2.56289	2.1102	0.348663	0.189217	0.0680126	1.86286	0.0654773	0.570723	1.77862	1	2.1102	0.609869	0.213577	3217790	0.829605	1.82015	0.101739	8	8	8	39	39	39	23.605	0	94.113	13785000000	5052000000	8733000000	3	2	5	4	5	4	4	6	4
F7FJR8	F7FJR8	Las1l	ENSRNOG00000021748		0.0841467	0.419285	-0.0668483	-0.221169	-0.127019	0.133932	0.385013	0.307659	0.251716	0.373911	-0.127019	0.0911836	0.307659	0.0655398	0.570723	0.275534	1	0.251716	0.613493	-0.138345	65923600	0.128586	0.236978	0.0777811	17	17	1	29.9	29.9	1	87.746	0	195.32	8955000000	4234800000	4720200000	8	6	8	3	6	11	9	8	8
Q5BK85	Q5BK85	Tmed1	ENSRNOG00000008037	Transmembrane emp24 domain-containing protein 1	-0.243784	-0.588954	0.0991746	0.531008	-0.280551	-0.311342	-0.496874	-0.18731	-0.416369	0.250156	0.0991746	0.668374	-0.311342	0.0662554	0.575898	-0.331842	1	-0.416369	0.961066	0.116544	22594500	0.155797	0.244072	0.406058	4	4	4	17.2	17.2	17.2	25.209	0	10.61	977370000	444920000	532450000	3	3	2	1	2	3	2	2	1
D3ZQV8	D3ZQV8;M0R464	Phf6	ENSRNOG00000002276;ENSRNOG00000048650		0.166787	-0.1027	0.0879657	-0.24861	0.14254	0.253397	0.130311	0.364976	0.0320431	0.851368	0.0879657	0.965131	0.253397	0.066473	0.575898	0.249561	1	0.0320431	1	-0.00603478	153111000	0.11738	0.190556	0.211841	6	6	6	20.1	20.1	20.1	41.097	0	63.693	4667700000	2150000000	2517700000	1	3	2	4	3	4	1	4	2
B2GUY0	B2GUY0	Man1b1	ENSRNOG00000012559	Endoplasmic reticulum mannosyl-oligosaccharide 1,2-alpha-mannosidase	-0.311222	-0.725661	0.787683	NaN	0.473527	-0.211632	-0.261426	NaN	-0.518441	0.242072	0.630605	0.155413	-0.236529	0.0667656	0.575898	-0.236529	1	-0.518441	0.64184	0.630605	2529400	0.0352102	0.293053	0.222142	6	6	6	13.1	13.1	13.1	74.894	0	14.665	264780000	131860000	132920000	0	3	1	1	1	1	0	0	0
G3V743	G3V743;A0A0G2K8S6;O88941	Mogs	ENSRNOG00000008648	Mannosyl-oligosaccharide glucosidase	-0.26338	-0.777565	0.0226651	0.0271836	-0.180244	-0.227863	-0.198433	-0.0781929	-0.520473	0.292083	0.0226651	0.59015	-0.198433	0.0667753	0.575898	-0.168163	1	-0.520473	0.907197	-0.0434651	178633000	0.0792937	0.363584	0.118475	18	18	18	33.3	33.3	33.3	81.025	0	78.801	7347600000	3417900000	3929700000	9	8	7	8	5	9	5	7	7
Q5I0H4	Q5I0H4	Tmco1	ENSRNOG00000003928	Transmembrane and coiled-coil domains protein 1	-0.244827	-0.240584	-0.0518045	-0.0336444	-0.0863658	-0.192969	-0.114498	-0.0748525	-0.242706	0.00556454	-0.0518045	0.0657843	-0.114498	0.0668175	0.575898	-0.12744	1	-0.242706	0.609869	-0.0572716	90109000	0.0601127	0.00300023	0.0267825	4	4	4	24.5	24.5	24.5	21.175	0	110.51	6909400000	3308700000	3600700000	2	2	3	2	1	3	1	2	1
Q9JHY2	Q9JHY2;G3V804	Sfxn3	ENSRNOG00000015442	Sideroflexin;Sideroflexin-3	-0.0310266	-0.600032	0.0647701	0.319113	0.0936476	-0.307413	-0.170062	-0.125224	-0.315529	0.467111	0.0936476	0.186283	-0.170062	0.0670276	0.575898	-0.2009	1	-0.315529	0.64896	0.159177	272239000	0.0949285	0.402348	0.139259	12	12	11	55.8	55.8	49.8	35.433	0	245.22	14251000000	6419700000	7831400000	10	8	7	10	8	10	9	7	6
Q6AXW0	Q6AXW0	Cdca8		Borealin	0.794005	1.03575	0.510702	0.10047	-0.566277	0.375088	0.464438	0.883372	0.914878	0.0836258	0.10047	0.9663	0.464438	0.0670283	0.575898	0.574299	1	0.914878	1	0.0149649	NaN	0.271367	0.170941	0.543557	11	11	11	46.9	46.9	46.9	32.098	0	99.594	6658000000	3001500000	3656500000	8	5	6	7	6	6	3	4	5
D4A0U3	D4A0U3	Zfp638	ENSRNOG00000014501		0.692285	0.633116	0.359519	-0.126746	-0.222421	0.586217	0.303567	0.251505	0.662701	0.0284013	-0.126746	0.986458	0.303567	0.0672622	0.575898	0.38043	1	0.662701	1	0.00345056	180189000	0.180108	0.0418388	0.312053	28	28	28	22.9	22.9	22.9	208.14	0	184.09	5180800000	2259000000	2921800000	11	9	5	6	11	4	7	8	6
D4A1C5	D4A1C5	Spc24	ENSRNOG00000029862		NaN	NaN	-0.387959	-0.648537	-0.831127	0.414136	0.334683	NaN	NaN	1	-0.648537	0.040116	0.374409	0.0672963	0.575898	0.374409	1	NaN	0.609869	-0.622541	22834800	0.0561816	NaN	0.222725	4	4	4	36	36	36	22.615	0	10.682	248060000	127760000	120300000	1	0	1	0	0	0	0	1	0
B1WC67	B1WC67	Slc25a24	ENSRNOG00000020470		-0.140032	-0.6335	0.000363859	0.298819	-0.06578	-0.315136	-0.109584	-0.302745	-0.386766	0.361505	0.000363859	0.559586	-0.302745	0.0677525	0.575898	-0.242488	1	-0.386766	0.882667	0.077801	231401000	0.115266	0.348934	0.194243	19	19	19	57.9	57.9	57.9	52.89	0	266.62	25591000000	11439000000	14153000000	12	12	12	11	11	12	9	8	10
A0A0G2K7B3	A0A0G2K7B3;A0A140TAI3;G3V9R8	Hnrnpc	ENSRNOG00000011621;ENSRNOG00000050800	Heterogeneous nuclear ribonucleoprotein C	0.739392	0.69922	0.159203	-0.216271	-0.501269	0.804758	0.406262	0.350728	0.719306	0.0177722	-0.216271	0.433144	0.406262	0.0678552	0.575898	0.520582	1	0.719306	0.792287	-0.186112	60320000	0.247664	0.0284055	0.331267	17	1	1	55.3	6	6	33.056	0	115.82	2230800000	1051400000	1179400000	11	13	13	12	12	11	12	13	12
A4L691	A4L691	Pinx1	ENSRNOG00000012012	PIN2/TERF1-interacting telomerase inhibitor 1	0.605965	0.59598	-0.36271	-0.371866	-0.436745	1.12912	0.666992	0.433808	0.600973	0.00528827	-0.371866	0.00354316	0.666992	0.0679444	0.575898	0.743306	1	0.600973	0.609869	-0.39044	50970600	0.353882	0.00706015	0.0403615	8	8	8	23.6	23.6	23.6	36.71	0	82.624	4750600000	2096800000	2653800000	6	6	6	4	8	5	5	5	4
B2RZC6	B2RZC6;Q7TP98;A0A0H2UHX8	Ilf2	ENSRNOG00000014154	Interleukin enhancer-binding factor 2	0.102301	0.338134	-0.0262395	-0.478067	-0.479944	0.253352	0.10158	0.141075	0.220218	0.312967	-0.478067	0.16177	0.141075	0.0679846	0.575898	0.165336	1	0.220218	0.64184	-0.328083	209288000	0.0787407	0.166759	0.261406	22	22	22	80.3	80.3	80.3	43.062	0	323.31	102410000000	48541000000	53870000000	14	16	13	13	14	12	10	13	10
B1H275	B1H275	Wbscr22	ENSRNOG00000033700		-0.0557564	-0.574326	-0.317934	0.243059	0.499782	0.21333	0.236103	0.479631	-0.315041	0.438389	0.243059	0.616848	0.236103	0.0680893	0.575898	0.309688	1	-0.315041	0.922276	0.141635	26669900	0.147614	0.366684	0.418186	5	5	5	29.2	29.2	29.2	31.554	0	95.577	1151700000	536400000	615300000	2	1	1	1	1	1	1	2	1
M0RCP9	M0RCP9	Pin4	ENSRNOG00000050051		-1.21052	-1.20473	0.143263	0.602647	0.490939	-0.268162	-0.607593	-0.301126	-1.20762	0.00152464	0.490939	0.0965372	-0.301126	0.0682159	0.575898	-0.392294	0.986091	-1.20762	0.6207	0.412283	72849400	0.187182	0.0040901	0.23958	4	4	4	48.1	48.1	48.1	13.815	0	26.574	1843900000	938810000	905110000	2	1	2	1	2	2	2	2	2
D3ZT52	D3ZT52	Pbrm1	ENSRNOG00000028227		0.463324	0.254828	0.25086	-0.376687	-0.327035	0.780647	0.446727	0.305623	0.359076	0.17988	-0.327035	0.531743	0.446727	0.0682788	0.575898	0.510999	1	0.359076	0.861915	-0.150954	7037840	0.243947	0.147429	0.348866	39	39	39	33.3	33.3	33.3	197.18	0	292.99	12460000000	5644900000	6815100000	14	14	15	17	17	13	12	15	13
Q62952-2	Q62952-2;Q62952	Dpysl3	ENSRNOG00000018992	Dihydropyrimidinase-related protein 3	-0.271392	-1.64737	-0.139386	0.182263	0.303331	-0.0984741	-0.26662	-0.288719	-0.959381	0.396055	0.182263	0.474462	-0.26662	0.0682851	0.575898	-0.217938	1	-0.959381	0.82452	0.115402	37372500	0.104047	0.972963	0.228807	29	29	25	67.1	67.1	59.7	73.898	0	323.31	31481000000	14990000000	16490000000	9	14	13	14	13	15	11	13	10
D4AAG8	D4AAG8	Smchd1	ENSRNOG00000014319		0.171458	0.179146	-0.226756	0.250235	0.260865	0.350395	0.205397	0.134796	0.175302	0.0139581	0.250235	0.615279	0.205397	0.0683064	0.575898	0.230196	1	0.175302	0.921278	0.0947816	119129000	0.109918	0.00543649	0.27851	38	38	38	26.1	26.1	26.1	225.99	0	133.05	6831100000	3129600000	3701500000	13	10	5	10	12	7	7	8	7
Q91V33	Q91V33;F1LMN8;Q9JLP1;Q920F3	Khdrbs1	ENSRNOG00000009539;ENSRNOG00000012284;ENSRNOG00000046794	KH domain-containing, RNA-binding, signal transduction-associated protein 1;KH domain-containing, RNA-binding, signal transduction-associated protein 2;KH domain-containing, RNA-binding, signal transduction-associated protein 3	0.111784	0.231216	0.0582942	-0.365056	-0.302701	0.26408	0.149112	0.411148	0.1715	0.213312	-0.302701	0.263553	0.26408	0.0684356	0.57597	0.27478	1	0.1715	0.682192	-0.203154	109965000	0.131345	0.0844514	0.228557	10	10	10	28.2	28.2	28.2	48.315	0	323.31	50696000000	23703000000	26994000000	4	5	5	5	6	6	6	7	7
F1LXS6	F1LXS6;A0A0G2JWV8;A0A0G2K0L6	Thoc7	ENSRNOG00000007701		0.124656	0.189242	0.136244	-0.079675	-0.398088	0.226325	0.368467	0.136833	0.156949	0.129185	-0.079675	0.53956	0.226325	0.0686864	0.576156	0.243875	1	0.156949	0.868099	-0.11384	16606500	0.11681	0.0456692	0.268799	7	7	7	41.7	41.7	41.7	23.699	0	188.41	2552300000	1172200000	1380100000	3	4	3	4	4	3	2	3	2
D4A7J8	D4A7J8	Prpf4	ENSRNOG00000014777		0.198845	0.306862	0.00998502	-0.406952	-0.238064	0.316863	0.113284	0.207868	0.252854	0.133966	-0.238064	0.222532	0.207868	0.0686992	0.576156	0.212672	1	0.252854	0.667493	-0.211677	82387000	0.101875	0.0763791	0.209717	21	21	21	53.7	53.7	53.7	58.342	0	192.34	24177000000	11640000000	12537000000	10	13	8	12	10	14	10	7	11
M0RAP5	M0RAP5	Sbf1	ENSRNOG00000008392		0.399991	-1.12325	NaN	0.556054	0.685397	0.760779	NaN	0.946132	-0.361627	0.717789	0.620725	0.0660892	0.853456	0.0688605	0.576495	0.853456	1	-0.361627	0.609869	0.620725	129947000	0.131064	1.07709	0.0914595	11	11	11	8.3	8.3	8.3	211.4	0	16.716	482520000	206530000	275990000	2	2	1	0	0	3	0	1	0
Q9WVK7	Q9WVK7	Hadh	ENSRNOG00000010697	Hydroxyacyl-coenzyme A dehydrogenase, mitochondrial	-0.114778	-0.656642	0.170169	0.135701	0.224544	-0.0760361	-0.0641563	-0.149891	-0.38571	0.389835	0.170169	0.0207305	-0.0760361	0.0690515	0.577082	-0.0966944	1	-0.38571	0.609869	0.176805	254902000	0.0464508	0.383156	0.0447914	9	9	9	50.3	50.3	50.3	34.447	0	140.15	10434000000	4534100000	5899500000	4	4	6	5	4	5	6	5	3
H9KVE4	H9KVE4;Q2LC84-2;F1LRS4;Q2LC84;F1LNZ2	Numb	ENSRNOG00000009653	Protein numb homolog	-0.855484	NaN	0.398528	0.152213	-0.30223	-0.232633	-0.186739	NaN	-0.855484	1	0.152213	0.725566	-0.209686	0.0693929	0.578921	-0.209686	1	-0.855484	0.99781	0.0828373	118219000	0.0324522	NaN	0.355493	3	3	3	6	6	6	65.756	0	17.166	1881300000	849990000	1031300000	1	0	1	1	1	0	0	0	0
P84817	P84817;P84817-3;P84817-2	Fis1	ENSRNOG00000001420	Mitochondrial fission 1 protein	-0.830358	-0.760459	0.130376	0.746802	0.51301	-0.0735934	-0.21589	-0.208382	-0.795408	0.0279546	0.51301	0.123162	-0.208382	0.0696016	0.579234	-0.165955	1	-0.795408	0.638884	0.463396	24760100	0.0800756	0.0494262	0.311193	5	5	5	41.4	41.4	41.4	16.994	0	52.07	1243200000	600570000	642580000	2	2	2	2	1	1	2	1	3
C7E1V1	C7E1V1;Q63269	Itpr3		Inositol 1,4,5-trisphosphate receptor type 3	-0.199706	-0.518938	0.305501	0.0965112	-0.0591562	-0.432478	-0.457644	-0.154657	-0.359322	0.266127	0.0965112	0.392422	-0.432478	0.0696732	0.579234	-0.348259	1	-0.359322	0.769635	0.114285	NaN	0.168136	0.225731	0.182977	34	34	30	17.4	17.4	16.1	304.21	0	124.74	3961000000	1691200000	2269800000	7	7	5	5	8	6	7	4	3
Q8VHK0	Q8VHK0;F7F557	Acot8	ENSRNOG00000015187	Acyl-coenzyme A thioesterase 8	-0.218826	-0.952185	0.293506	0.403657	-0.0261181	-0.0695112	-0.175714	-0.210908	-0.585506	0.356192	0.293506	0.224783	-0.175714	0.0700223	0.580299	-0.152044	1	-0.585506	0.667493	0.223682	167446000	0.0736102	0.518563	0.223234	6	6	6	25.9	25.9	25.9	36.003	0	48.353	1836700000	784910000	1051700000	4	3	3	4	4	2	2	3	2
F1M7L9	F1M7L9	Pkp2	ENSRNOG00000001825		-0.509378	-0.23572	0.450974	-0.508612	-0.472892	-0.504098	-0.360461	-0.170643	-0.372549	0.22408	-0.472892	0.630099	-0.360461	0.070173	0.580299	-0.345068	1	-0.372549	0.931047	-0.176843	91966000	0.16726	0.193505	0.543999	13	13	13	21.6	21.6	21.6	88.596	0	60.659	2791400000	1351400000	1440000000	4	6	5	3	3	2	2	4	6
B0BNJ4	B0BNJ4	Ethe1	ENSRNOG00000019982		0.201361	-0.668262	0.111434	0.339277	0.111045	0.152693	0.225368	0.0779385	-0.23345	0.686318	0.111434	0.13275	0.152693	0.0702421	0.580299	0.152	1	-0.23345	0.640748	0.187252	82716400	0.0737172	0.614916	0.131658	13	13	13	72.4	72.4	72.4	27.676	0	323.31	88750000000	36518000000	52232000000	7	7	8	8	9	9	7	7	5
D3ZBP3	D3ZBP3	Exosc2	ENSRNOG00000009245		0.614325	0.265617	-0.151732	-0.394175	-0.248722	0.663575	0.42117	0.23731	0.439971	0.240196	-0.248722	0.0640262	0.42117	0.0702877	0.580299	0.440685	1	0.439971	0.609869	-0.264876	15511100	0.213802	0.246573	0.122026	9	9	9	46.1	46.1	46.1	32.689	0	67.384	7004300000	3356800000	3647600000	5	5	4	3	4	4	4	6	7
Q6AYC2	Q6AYC2	Irgm	ENSRNOG00000031138	Immunity-related GTPase family M protein	NaN	NaN	-0.90886	NaN	-0.517977	0.203139	0.254231	NaN	NaN	1	-0.713418	0.170226	0.228685	0.070823	0.583709	0.228685	1	NaN	0.642735	-0.713418	33997600	0.036128	NaN	0.276396	2	2	2	9	9	9	46.337	0	8.0277	245980000	122530000	123450000	1	0	1	0	0	0	0	0	0
A0A0G2K904	A0A0G2K904	Sltm			0.249624	0.620106	-0.2447	-0.431492	-0.337637	0.223359	0.159809	0.407838	0.434865	0.256364	-0.337637	0.024527	0.223359	0.0711901	0.585723	0.263669	1	0.434865	0.609869	-0.337943	NaN	0.128834	0.261971	0.0933967	20	20	20	22.2	22.2	22.2	117.17	0	323.31	14166000000	6505200000	7660500000	6	7	7	8	7	8	9	9	8
D4A531	D4A531	Polr2i	ENSRNOG00000020799;ENSRNOG00000050560	DNA-directed RNA polymerase subunit	0.829656	NaN	-1.30393	NaN	NaN	0.365245	0.457962	NaN	0.829656	1	-1.30393	1	0.411603	0.0714013	0.586449	0.411603	1	0.829656	1	-1.30393	91011300	0.0655611	NaN	NaN	4	4	4	46.4	46.4	46.4	14.523	0.0022793	3.4487	120970000	57127000	63843000	0	1	1	0	1	2	0	0	0
Q4V8A2	Q4V8A2	Cdc27	ENSRNOG00000005904	Cell division cycle protein 27 homolog	0.605313	-0.00944899	-0.312152	-0.15639	-0.203985	0.067501	0.0245864	0.0755111	0.297932	0.509937	-0.203985	0.0397561	0.067501	0.0715928	0.587012	0.0558662	1	0.297932	0.609869	-0.224176	92316600	0.0273836	0.434703	0.0798196	8	8	8	16.1	16.1	16.1	91.662	0	39.554	627170000	266510000	360660000	0	3	3	3	3	1	1	1	1
D3ZPX0	D3ZPX0	Zmym5	ENSRNOG00000029220		0.874986	0.626112	0.0136409	0.0967399	0.170652	1.01191	1.17418	0.379732	0.750549	0.104597	0.0967399	0.174861	1.01191	0.0717528	0.58713	0.855274	1	0.750549	0.645792	0.0936777	40894100	0.419748	0.17598	0.0785504	2	2	2	4	4	4	70.328	0	54.516	170910000	64268000	106640000	1	1	1	1	1	2	0	1	0
Q924S1	Q924S1;A0A0G2JWH4	Agpat4	ENSRNOG00000017731	1-acyl-sn-glycerol-3-phosphate acyltransferase delta	-0.046744	NaN	1.1578	0.661699	0.168545	-0.494096	-0.3932	NaN	-0.046744	1	0.661699	0.146083	-0.443648	0.0720812	0.58713	-0.443648	1	-0.046744	0.641577	0.662682	50930100	0.0713439	NaN	0.494629	6	6	6	15.3	15.3	15.3	43.794	0	16.292	515400000	205680000	309710000	2	3	2	1	1	3	1	0	1
A0A096MKH8	A0A096MKH8;A0A096MJI1;A0A096MJV6	Zfx	ENSRNOG00000005624		0.0233097	0.133472	-0.672424	-0.229332	-0.296587	-0.377758	-0.146206	-0.206778	0.0783907	0.38993	-0.296587	0.101333	-0.206778	0.0723331	0.58713	-0.243581	1	0.0783907	0.627753	-0.399448	63750400	0.120083	0.0778963	0.238785	4	4	4	10.4	10.4	10.4	56.834	0	13.507	591270000	282820000	308450000	2	2	2	2	2	1	1	1	2
D4A383	D4A383;A0A0G2K0W3	Ttyh3	ENSRNOG00000024244	Protein tweety homolog	NaN	-0.475029	NaN	NaN	NaN	NaN	0.0673633	0.0847447	-0.475029	1	NaN	1	0.076054	0.0724323	0.58713	0.076054	1	-0.475029	1	NaN	18080100	0.0122905	NaN	NaN	2	2	2	5.5	5.5	5.5	57.58	0.00022366	5.0894	31933000	15602000	16331000	0	0	0	1	0	0	1	0	1
A0A0G2JU91	A0A0G2JU91	Ncor2			0.697418	0.481506	0.926034	1.70821	0.22468	0.356544	1.07229	0.750435	0.589462	0.115315	0.926034	0.156142	0.750435	0.0724616	0.58713	0.726422	1	0.589462	0.64184	0.952975	NaN	0.358474	0.152673	0.742133	16	16	1	12.1	12.1	0.6	269.12	0	36.142	645800000	235120000	410680000	1	4	2	3	1	0	0	2	0
M0RC54	M0RC54	Bod1l1	ENSRNOG00000050437		1.5368	0.552983	0.338919	0.0351344	0.136933	0.55545	NaN	0.441305	1.04489	0.280109	0.136933	0.196619	0.498377	0.0725875	0.58713	0.498377	1	1.04489	0.653844	0.170329	73758100	0.0807129	0.695663	0.154621	13	13	13	6.2	6.2	6.2	328.57	0	76.547	919550000	398570000	520980000	1	4	0	2	1	2	2	6	3
G3V6P6	G3V6P6;Q5PPI5	Rbm3	ENSRNOG00000005387		0.2759	0.674455	0.684929	0.365805	0.396319	0.663397	0.2452	0.766418	0.475177	0.252799	0.396319	0.041672	0.663397	0.0726996	0.58713	0.558338	1	0.475177	0.609869	0.482351	15882100	0.276034	0.281821	0.1761	6	6	1	55.1	55.1	11.5	16.983	0	290.22	45462000000	17990000000	27472000000	3	3	3	3	3	3	4	5	3
D3ZP89	D3ZP89	Kdm1b	ENSRNOG00000016519		0.389745	-0.030991	-0.321731	-0.766305	-0.36922	0.448325	NaN	0.56472	0.179377	0.550515	-0.36922	0.0748601	0.506522	0.0728253	0.58713	0.506522	1	0.179377	0.609869	-0.485752	19908400	0.0823031	0.297505	0.244123	3	3	3	4.2	4.2	4.2	92.555	0	21.399	172860000	88596000	84267000	1	1	0	0	1	1	1	3	1
D3ZKC9	D3ZKC9	Virma	ENSRNOG00000014664	Vir-like m6A methyltransferase-associated	0.435518	0.354198	0.0858529	-0.193084	-0.0867186	0.485425	0.312369	0.167267	0.394858	0.0653251	-0.0867186	0.50976	0.312369	0.0729007	0.58713	0.321687	1	0.394858	0.847588	-0.0646498	29771200	0.159284	0.0575021	0.140772	33	33	33	26	26	26	201.53	0	158.5	6086200000	2722900000	3363300000	15	16	10	8	9	9	8	10	10
B0BMT9	B0BMT9;Q7TP12	Sqrdl	ENSRNOG00000000172		-0.0232112	-0.683351	-0.0453816	0.131062	-0.214216	-0.0954399	-0.0309963	-0.0901479	-0.353281	0.478384	-0.0453816	0.709206	-0.0901479	0.0730086	0.58713	-0.0721947	1	-0.353281	0.985843	-0.042845	121438000	0.0357768	0.466789	0.172653	26	26	26	64.7	64.7	64.7	50.201	0	323.31	149190000000	68395000000	80791000000	13	16	17	20	18	20	19	14	18
F1LYX9	F1LYX9	Dsg2	ENSRNOG00000016526		0.113045	-0.636919	0.677816	0.246024	-0.301721	-0.0543407	-0.150401	-0.0891465	-0.261937	0.611828	0.246024	0.540492	-0.0891465	0.0732416	0.58713	-0.0979627	1	-0.261937	0.868489	0.207373	15355400	0.0486331	0.530305	0.490911	22	22	22	32.7	32.7	32.7	122.29	0	145.87	4995400000	2421100000	2574300000	13	14	8	8	10	11	4	7	8
P51145	P51145;A0A0G2JZA4	Fosl2		Fos-related antigen 2	0.961192	0.76665	-0.135419	0.193231	-0.0227216	0.41939	0.571004	0.184847	0.863921	0.0713778	-0.0227216	0.914535	0.41939	0.0732926	0.58713	0.391747	1	0.863921	1	0.0116968	NaN	0.194557	0.137562	0.167007	4	4	4	19.3	19.3	19.3	35.255	0	22.152	8627300000	3460300000	5167000000	2	2	2	1	2	2	1	1	1
D4A8G7	D4A8G7	Snw1	ENSRNOG00000037998		0.307853	0.746147	-0.118527	0.000709664	-0.229868	0.662207	0.230137	0.715841	0.527	0.250882	-0.118527	0.223841	0.662207	0.0733237	0.58713	0.536062	1	0.527	0.667493	-0.115895	120764000	0.266292	0.30992	0.115311	19	19	19	45	45	45	61.463	0	323.31	22665000000	10035000000	12629000000	11	12	12	13	10	12	13	14	11
P62909	P62909;D3ZVH2;A0A0G2K689	Rps3	ENSRNOG00000007605;ENSRNOG00000017418	40S ribosomal protein S3	-0.547496	-2.31605	-0.177256	0.478194	0.327259	-0.544422	-0.265489	-0.229415	-1.43177	0.352221	0.327259	0.401463	-0.265489	0.0735551	0.58713	-0.346442	1	-1.43177	0.771559	0.209399	115127000	0.172402	1.25055	0.343252	16	16	16	70.8	70.8	70.8	26.674	0	323.31	135310000000	65501000000	69811000000	13	14	12	11	13	13	12	11	9
Q6AXY8	Q6AXY8	Dhrs1	ENSRNOG00000020264		-0.0959042	-0.807926	0.501507	0.582377	0.252303	-0.268633	-0.126354	-0.385251	-0.451915	0.424783	0.501507	0.0463073	-0.268633	0.0737941	0.58713	-0.26008	1	-0.451915	0.609869	0.445396	38313200	0.12966	0.503475	0.172043	18	18	18	76.4	76.4	76.4	34.015	0	323.31	48051000000	22356000000	25695000000	13	13	15	13	14	15	8	10	13
B1H282	B1H282	Colgalt1	ENSRNOG00000023317		-0.435945	-0.2519	0.028852	-0.268961	-0.275697	-0.416378	-0.295669	-0.135285	-0.343922	0.16644	-0.268961	0.228975	-0.295669	0.0739838	0.58713	-0.282444	1	-0.343922	0.668431	-0.171935	19900800	0.141012	0.13014	0.17392	11	11	11	19.8	19.8	19.8	71.114	0	16.92	837930000	432700000	405240000	4	4	2	3	3	5	2	0	2
B2RYX0	B2RYX0;M0R9L0	Naca	ENSRNOG00000002632		-0.73478	-2.25136	-0.239377	0.285283	0.403933	-0.279625	-0.381504	-0.122566	-1.49307	0.299164	0.285283	0.527282	-0.279625	0.074007	0.58713	-0.261232	1	-1.49307	0.859888	0.149947	2438020	0.130445	1.07239	0.342343	5	5	5	32.6	32.6	32.6	23.384	0	171.41	29722000000	14201000000	15521000000	4	5	3	4	4	3	4	5	5
Q498M4	Q498M4	Wdr5	ENSRNOG00000008212	WD repeat-containing protein 5	0.246448	0.290011	0.00233197	-0.173391	-0.0749348	0.256525	0.170697	0.458404	0.26823	0.051584	-0.0749348	0.248169	0.256525	0.0742681	0.58713	0.295209	1	0.26823	0.672969	-0.0819981	11423400	0.147703	0.0308041	0.0880744	11	11	11	51.5	51.5	51.5	36.588	0	121.5	13357000000	6433600000	6923400000	6	6	6	7	6	6	3	5	4
D3ZWL9	D3ZWL9	Dido1	ENSRNOG00000009936		1.33981	0.416927	0.133859	-0.291416	-0.12442	1.0083	1.37491	0.4397	0.878369	0.307941	-0.12442	0.526717	1.0083	0.0743886	0.58713	0.940973	1	0.878369	0.859609	-0.0939924	179864000	0.471228	0.652577	0.214264	19	19	19	14.4	14.4	14.4	243.29	0	84.024	4768000000	2124800000	2643200000	7	6	5	3	9	6	5	5	4
D3ZUL8	D3ZUL8	Zcchc8	ENSRNOG00000001243		0.19142	0.3739	0.147486	-0.353545	-0.00327897	0.273192	0.0998986	0.318953	0.28266	0.198773	-0.00327897	0.684509	0.273192	0.0744189	0.58713	0.230681	1	0.28266	0.970144	-0.0697791	40191400	0.115549	0.129033	0.25705	17	17	17	41.9	41.9	41.9	76.937	0	225.84	9531700000	4139700000	5392000000	6	10	5	6	5	10	4	9	8
D3Z8B2	D3Z8B2	Nup133	ENSRNOG00000017919		0.54399	-0.126318	-0.0620848	-0.339601	-0.320145	0.568583	0.48043	0.177961	0.208836	0.645253	-0.320145	0.114853	0.48043	0.0744257	0.58713	0.408991	1	0.208836	0.638884	-0.24061	67397800	0.204876	0.47398	0.154913	48	48	48	63.1	63.1	63.1	128.36	0	323.31	25767000000	11959000000	13808000000	17	16	15	21	19	18	15	15	15
Q4KLJ3	Q4KLJ3	Gnl2	ENSRNOG00000009430		0.260988	0.0349512	-0.288235	-0.725215	-0.389331	0.462507	0.583023	0.182671	0.14797	0.415249	-0.389331	0.0713489	0.462507	0.0746272	0.58713	0.4094	1	0.14797	0.609869	-0.467593	146797000	0.205392	0.159832	0.228761	23	23	23	36.6	36.6	36.6	83.868	0	118.43	12248000000	6048500000	6199600000	9	9	4	5	3	6	7	12	9
P07872-2	P07872-2;F1M609;F1LQC1;P07872	Acox1	ENSRNOG00000008755	Peroxisomal acyl-CoA oxidase 1,	-0.156765	-0.941591	0.22551	0.36427	0.0571093	-0.273784	-0.101447	-0.324995	-0.549178	0.394973	0.22551	0.135887	-0.273784	0.0746465	0.58713	-0.233409	1	-0.549178	0.641577	0.21563	103538000	0.117116	0.554956	0.153819	25	25	25	67.3	67.3	67.3	74.69	0	174.18	12665000000	5563400000	7101900000	9	10	7	8	9	8	9	8	4
Q9WVB1	Q9WVB1;A0A0H2UHP9;A0A0G2JT78;F1LVC3;A0A0G2K201;D3ZZP2	Rab6a	ENSRNOG00000009008;ENSRNOG00000009198;ENSRNOG00000018176	Ras-related protein Rab-6A	0.409715	-1.08578	0.184443	0.288555	-0.0237841	0.241853	0.208204	0.0755616	-0.338035	0.729708	0.184443	0.244508	0.208204	0.0746582	0.58713	0.175206	1	-0.338035	0.669577	0.149738	111018000	0.0879197	1.05748	0.159035	13	13	13	61.5	61.5	61.5	23.59	0	157.06	77801000000	35398000000	42403000000	8	6	6	5	6	7	7	6	6
G3V6S8	G3V6S8	Srsf6	ENSRNOG00000006380	Serine/arginine-rich splicing factor 6	0.0063469	0.00489772	0.0332269	0.27371	0.429285	0.235642	0.0743736	0.217353	0.00562231	0.081596	0.27371	0.166884	0.217353	0.0747959	0.58713	0.17579	1	0.00562231	0.64184	0.245407	165502000	0.0883037	0.00102472	0.19954	9	9	7	22.4	22.4	17.7	39.025	0	91.092	46996000000	21661000000	25335000000	5	6	6	5	5	7	7	8	6
D3ZD80	D3ZD80	Gtf3c4	ENSRNOG00000012784		-0.0834273	-0.0491433	-0.101824	-0.700407	-0.322597	0.204401	0.35974	0.131615	-0.0662853	0.161106	-0.322597	0.165079	0.204401	0.0748262	0.58713	0.231919	1	-0.0662853	0.64184	-0.374943	12755300	0.116525	0.0242425	0.302705	14	14	14	24	24	24	91.713	0	58.518	2319500000	1056000000	1263500000	1	4	2	2	1	7	2	3	3
B2RYQ5	B2RYQ5;A0A0G2KAN5	Erh		Enhancer of rudimentary homolog	0.247866	0.298274	0.0369203	-0.497201	-0.38188	0.45117	0.218251	0.187299	0.27307	0.0585931	-0.38188	0.225782	0.218251	0.0755334	0.58713	0.285573	1	0.27307	0.667493	-0.28072	NaN	0.144244	0.0356438	0.281063	4	4	4	41.3	41.3	41.3	12.259	0	287.84	56551000000	26782000000	29769000000	2	2	2	2	2	2	3	2	2
M0RBV9	M0RBV9	Nup214	ENSRNOG00000047244		1.923	NaN	-0.278719	-0.566165	-0.404916	1.24513	0.98324	0.386038	1.923	1	-0.404916	0.037633	0.98324	0.075575	0.58713	0.87147	1	1.923	0.609869	-0.4166	14588200	0.440317	NaN	0.144078	5	5	5	25.4	25.4	25.4	30.556	0	6.5942	555340000	246410000	308930000	0	1	0	1	1	0	1	0	0
D3ZTY9	D3ZTY9;A0A0G2JXU1	Nvl	ENSRNOG00000003629		0.308405	0.326343	-0.121413	-0.446052	-0.435876	0.335836	0.376331	0.794448	0.317374	0.0179863	-0.435876	0.0882764	0.376331	0.0756573	0.58713	0.502205	1	0.317374	0.61309	-0.334447	104407000	0.253898	0.0126842	0.184563	17	17	17	30.6	30.6	30.6	94.446	0	82.235	2439800000	1195100000	1244700000	6	11	5	5	6	3	2	2	3
O54772	O54772	Smarcd2	ENSRNOG00000010557	SWI/SNF-related matrix-associated actin-dependent regulator of chromatin subfamily D member 2	0.0611073	0.278671	0.225274	-0.519676	-0.277917	0.180606	0.125798	0.0579732	0.169889	0.362576	-0.277917	0.476268	0.125798	0.0757136	0.58713	0.121459	1	0.169889	0.826197	-0.190773	94203200	0.0614314	0.153841	0.380043	14	14	12	37.5	37.5	32	59.128	0	131.31	14607000000	6853300000	7753200000	7	8	6	10	7	10	6	5	6
Q5U362	Q5U362;P55260	Anxa4	ENSRNOG00000018159	Annexin;Annexin A4	-0.361506	-1.64571	-0.170623	-0.331105	0.384579	-0.56413	-0.636084	-0.196674	-1.00361	0.362343	-0.170623	0.87367	-0.56413	0.075816	0.58713	-0.465629	1	-1.00361	1	-0.0390496	183109000	0.235685	0.908069	0.375546	18	18	18	66.1	66.1	66.1	35.893	0	219.88	12266000000	6205400000	6061100000	7	9	8	7	8	8	8	7	5
B4F786	B4F786	Cd2bp2	ENSRNOG00000017201		0.101862	1.42033	0.0898685	0.185263	0.215925	0.358508	0.349008	0.113297	0.761096	0.454421	0.185263	0.0497862	0.349008	0.0762279	0.58713	0.273604	1	0.761096	0.609869	0.163686	205629000	0.138911	0.932298	0.0657401	8	8	8	42.9	42.9	42.9	37.54	0	54.146	4599000000	1661600000	2937500000	2	2	3	5	4	1	3	1	3
F1LVX1	F1LVX1	Dnajc1	ENSRNOG00000000150		0.541253	0.458431	0.768587	0.397636	-0.0790512	0.346315	0.931855	0.507922	0.499842	0.0526227	0.397636	0.277665	0.507922	0.076288	0.58713	0.595364	1	0.499842	0.694991	0.362391	86711200	0.302406	0.0585641	0.424917	5	5	5	11.9	11.9	11.9	65.36	0	12.813	598870000	249750000	349110000	1	2	2	1	1	1	0	3	1
A0A096MJA9	A0A096MJA9;A0A096MKE0;A0A0G2K2B5;A0A096MIY8;A0A096MK70;A0A096MJR0;A0A096MJT4;Q5U2Q8;A0A0G2KAD6	Asph	ENSRNOG00000007445		0.0262423	-0.225024	-0.168409	-0.866624	-0.330735	0.0540268	0.0905929	0.0314901	-0.099391	0.573909	-0.330735	0.163592	0.0540268	0.0763345	0.58713	0.0587033	1	-0.099391	0.64184	-0.455256	27476300	0.0298276	0.177672	0.365384	14	14	14	31.2	31.2	31.2	74.889	0	200.66	2744100000	1622200000	1121900000	3	5	2	3	5	5	4	5	2
D3ZAA3	D3ZAA3;Q00918	Ltbp1	ENSRNOG00000033090	Latent-transforming growth factor beta-binding protein 1	-0.617914	-2.91119	NaN	NaN	-0.097826	-0.942252	NaN	-1.20161	-1.76455	0.36685	-0.097826	1	-1.07193	0.0766439	0.58713	-1.07193	1	-1.76455	1	-0.097826	31097100	0.183394	1.62159	NaN	3	3	3	2.7	2.7	2.7	186.6	0	7.5835	35985000	18713000	17271000	0	1	1	0	1	1	1	0	1
Q7TSU1	Q7TSU1	Arfgef2	ENSRNOG00000007485	Brefeldin A-inhibited guanine nucleotide-exchange protein 2	0.662297	0.0759425	-0.168261	0.641667	0.393816	0.592343	0.448392	0.182783	0.36912	0.427319	0.393816	0.350977	0.448392	0.0766904	0.58713	0.407839	1	0.36912	0.740833	0.289074	169733000	0.20777	0.414615	0.414999	19	19	14	14.5	14.5	11	201.97	0	37.384	1548100000	607300000	940800000	4	5	4	4	6	5	1	4	4
Q5XI77	Q5XI77	Anxa11	ENSRNOG00000010984	Annexin	-0.261437	-1.73243	-0.0836834	0.515593	0.714731	-0.303171	-0.373066	-0.75472	-0.996936	0.404649	0.515593	0.252179	-0.373066	0.0767211	0.58713	-0.476986	1	-0.996936	0.672969	0.382214	3833120	0.243051	1.04015	0.415583	14	14	14	31	31	31	54.16	0	93.872	5364300000	2461900000	2902400000	3	4	5	4	5	4	1	5	2
B2RZ76	B2RZ76	Dhrsx			-0.0224197	1.02829	NaN	0.0229004	NaN	-0.466594	-0.370247	-0.14256	0.502933	0.513878	0.0229004	1	-0.370247	0.0767546	0.58713	-0.326467	1	0.502933	1	0.0229004	NaN	0.166394	0.742961	NaN	3	3	3	24.7	24.7	24.7	33.375	0.00022442	5.1814	127160000	55819000	71339000	3	1	2	0	1	0	1	0	1
F1LNF3	F1LNF3	Nfxl1	ENSRNOG00000002296		-0.000997087	-1.68715	-0.666062	-0.51469	-0.354358	-0.272571	-0.0849792	-0.261202	-0.844076	0.499624	-0.51469	0.0295657	-0.261202	0.0768271	0.58713	-0.20625	1	-0.844076	0.609869	-0.511703	38003900	0.105178	1.19229	0.155874	10	10	10	17.8	17.8	17.8	101.92	0	33.896	657550000	356420000	301130000	5	5	2	4	4	3	1	3	1
D3ZUD0	D3ZUD0;B5DF83	Ect2	ENSRNOG00000024365		0.571073	0.124593	1.12777	1.2746	-0.0253894	0.612787	0.365245	0.211496	0.347833	0.36325	1.12777	0.193727	0.365245	0.0770049	0.58713	0.396509	1	0.347833	0.650983	0.792327	132490000	0.202464	0.315709	0.711959	6	6	6	9.8	9.8	9.8	102.92	0	5.7085	371220000	159090000	212130000	1	1	1	0	1	1	1	1	1
P41516	P41516	Top2a		DNA topoisomerase 2-alpha	NaN	0.510354	0.169914	NaN	NaN	1.87465	NaN	2.39353	0.510354	1	0.169914	1	2.13409	0.0770157	0.58713	2.13409	1	0.510354	1	0.169914	NaN	0.366904	NaN	NaN	65	1	1	45.7	1	1	173.22	0	36.551	143020000	37334000	105680000	42	41	45	41	42	40	42	42	47
Q498C9	Q498C9	Zfp207	ENSRNOG00000000236		0.480685	1.02638	-0.0291926	0.294849	0.505085	0.528273	0.298402	0.873544	0.753531	0.221164	0.294849	0.240085	0.528273	0.0770556	0.58713	0.56674	1	0.753531	0.669577	0.256914	67418700	0.289494	0.385862	0.269151	5	5	5	12.3	12.3	12.3	49.777	0	98.548	8835000000	3918900000	4916100000	4	3	2	3	3	4	3	3	2
E9PSY8	E9PSY8	Eps15	ENSRNOG00000010299		1.04747	0.245367	0.23077	0.410765	0.0578569	0.910481	0.519402	1.5168	0.646418	0.353515	0.23077	0.149351	0.910481	0.0772814	0.58713	0.982228	1	0.646418	0.64184	0.233131	132763000	0.502556	0.567172	0.176466	13	13	13	23.3	23.3	23.3	98.793	0	63.017	1072900000	447400000	625530000	1	3	1	2	6	6	4	1	3
D4A414	D4A414	Cox15	ENSRNOG00000017230		-0.197872	-1.05601	0.147237	0.325052	0.212277	-0.289578	-0.0874436	-0.246992	-0.626938	0.382079	0.212277	0.0481092	-0.246992	0.0774523	0.58713	-0.208004	1	-0.626938	0.609869	0.228189	270940000	0.106558	0.606792	0.0899693	8	8	8	25.1	25.1	25.1	45.914	0	34.227	6277200000	2999400000	3277800000	4	4	5	3	3	5	3	3	1
E9PT82	E9PT82;P58405-2;P58405	Strn3	ENSRNOG00000005585	Striatin-3	0.714751	-0.103007	0.458006	0.271545	0.00705191	0.63143	0.807849	NaN	0.305872	0.59112	0.271545	0.201356	0.71964	0.0776461	0.58713	0.71964	1	0.305872	0.656891	0.245535	81940500	0.124747	0.578243	0.2266	9	7	7	19.4	17	17	77.628	0	24.554	534950000	204660000	330290000	0	1	1	0	1	0	1	1	1
D3ZKD3	D3ZKD3	Alkbh5	ENSRNOG00000028341	RNA demethylase ALKBH5	NaN	NaN	NaN	-1.0952	-0.417695	-1.27118	-0.993522	NaN	NaN	1	-0.756449	0.268043	-1.13235	0.0776641	0.58713	-1.13235	1	NaN	0.687284	-0.756449	46679900	0.196335	NaN	0.479071	2	2	2	10.1	10.1	10.1	44.453	0.00065431	4.4269	143250000	69740000	73514000	1	0	1	0	0	0	0	0	0
A0A0G2KAL4	A0A0G2KAL4;A0A0G2JYS1;A0A0G2JZ50;Q4V8B0;A0A0G2K7Y2	Oxr1	ENSRNOG00000008019	Oxidation resistance protein 1	NaN	NaN	NaN	NaN	NaN	NaN	-0.167377	-0.214173	NaN	1	NaN	1	-0.190775	0.0776915	0.58713	-0.190775	1	NaN	1	NaN	80737300	0.0330898	NaN	NaN	2	2	2	4.2	4.2	4.2	84.125	0.0012704	3.8433	7902300	3685400	4216900	0	0	1	0	0	0	0	1	0
Q5U2X0	Q5U2X0;Q5U2X0-2	Cdkn2aip	ENSRNOG00000022736	CDKN2A-interacting protein	0.236593	0.596759	0.020174	-0.363142	-0.201883	1.15989	1.37729	0.414415	0.416676	0.259705	-0.201883	0.243779	1.15989	0.0777183	0.58713	0.983864	1	0.416676	0.669577	-0.181617	47385300	0.504996	0.254676	0.19246	12	12	12	33.3	33.3	33.3	60.743	0	121.68	3478100000	1845200000	1632900000	2	4	1	3	3	2	5	6	4
Q63279	Q63279;	Krt19	ENSRNOG00000014233	Keratin, type I cytoskeletal 19	0.193626	-0.224951	1.11563	0.543159	-0.256267	0.501002	0.151394	0.447262	-0.0156624	0.952446	0.543159	0.360902	0.447262	0.0778042	0.58713	0.366552	1	-0.0156624	0.747663	0.467508	87848500	0.18826	0.295979	0.689071	34	24	10	80.1	69	23.8	44.635	0	323.31	281020000000	118300000000	162710000000	24	21	25	25	23	22	17	20	17
G3V6C4	G3V6C4;O70199	Ugdh	ENSRNOG00000002643	UDP-glucose 6-dehydrogenase	-0.531297	-1.26381	-0.0476955	0.282117	0.662006	NaN	-0.955113	-0.745985	-0.897555	0.24665	0.282117	0.282364	-0.850549	0.0778733	0.58713	-0.850549	1	-0.897555	0.697885	0.298809	44299200	0.147876	0.517968	0.355145	18	18	18	58.2	58.2	58.2	54.886	0	98.045	4939100000	2357600000	2581500000	0	0	2	2	2	1	1	3	2
A0A0G2JX64	A0A0G2JX64;P04692-6;P04692-3;P04692;Q91XN6;A0A0G2K7F7	Tpm1	ENSRNOG00000018184	Tropomyosin alpha-1 chain	-0.185915	-1.19813	0.297296	0.524392	0.4556	-0.107042	-0.117937	-0.254406	-0.692023	0.401997	0.4556	0.0240405	-0.117937	0.077882	0.58713	-0.159795	1	-0.692023	0.609869	0.425763	77147600	0.0821166	0.715744	0.116451	19	12	0	50.7	33.8	0	32.708	0	323.31	25320000000	12246000000	13074000000	10	10	8	6	6	7	7	7	6
D3ZUB7	D3ZUB7	Anapc4	ENSRNOG00000004130		-0.428834	-0.276293	-0.135507	-0.0788645	-0.463792	-0.203734	-0.556096	-0.680615	-0.352563	0.135631	-0.135507	0.200251	-0.556096	0.0782198	0.588049	-0.480149	1	-0.352563	0.656891	-0.226054	60589400	0.247346	0.107863	0.207826	8	8	8	13.6	13.6	13.6	91.776	0	20.167	624930000	326910000	298020000	1	0	1	0	1	1	1	2	1
G3V7I8	G3V7I8	Slk	ENSRNOG00000011339		-0.119221	-0.176853	-0.164746	0.307118	0.468379	-0.300825	-0.183697	-0.100724	-0.148037	0.122391	0.307118	0.396013	-0.183697	0.078275	0.588049	-0.195082	1	-0.148037	0.770119	0.203584	274793000	0.100535	0.0407524	0.329016	25	25	4	30.8	30.8	7.5	137.64	0	151.28	6217500000	2917300000	3300200000	4	2	9	6	8	7	5	8	7
Q4KM73	Q4KM73;A0A0G2JSJ2;A0A0G2JTN5	Cmpk1		UMP-CMP kinase	-1.35182	-1.31044	0.108138	0.309449	0.574778	NaN	-0.92803	-0.723658	-1.33113	0.00989379	0.309449	0.134111	-0.825844	0.0783737	0.588049	-0.825844	1	-1.33113	0.641577	0.330789	NaN	0.144512	0.0292586	0.234051	9	9	9	58.7	58.7	58.7	22.169	0	49.118	6448200000	3368700000	3079500000	1	1	2	3	2	2	4	3	2
G3V6W7	G3V6W7	Cpsf3	ENSRNOG00000007194		0.470865	0.373425	0.0126402	-0.363505	-0.238443	0.307408	0.31249	0.0954749	0.422145	0.073149	-0.238443	0.217692	0.307408	0.0793648	0.591239	0.238458	1	0.422145	0.667493	-0.196436	60231500	0.123853	0.0689005	0.191559	22	22	22	48.8	48.8	48.8	77.601	0	230.9	8419700000	3749600000	4670100000	7	8	10	10	7	10	6	7	4
P05712	P05712	Rab2a		Ras-related protein Rab-2A	0.0120899	-0.378759	0.194121	0.0462779	-0.069529	-0.194775	-0.067731	-0.110342	-0.183335	0.520314	0.0462779	0.533178	-0.110342	0.0795999	0.591239	-0.124283	1	-0.183335	0.863948	0.0569567	NaN	0.0646594	0.276372	0.132149	12	12	1	59.9	59.9	3.3	23.535	0	323.31	53719000000	24312000000	29408000000	9	10	10	8	8	10	8	8	9
F1LYH3	F1LYH3	Mto1	ENSRNOG00000037659		-0.0860326	-2.32308	NaN	NaN	NaN	-0.357861	-0.196029	-0.127668	-1.20456	0.476434	NaN	1	-0.196029	0.0796253	0.591239	-0.227186	1	-1.20456	1	NaN	85357700	0.118217	1.58183	NaN	5	5	5	13.6	13.6	13.6	73.353	0	9.1921	110650000	50871000	59776000	3	1	0	3	0	1	0	1	0
B5DF46	B5DF46	Pmm2	ENSRNOG00000002615	Phosphomannomutase	-0.512617	-2.77401	0.0369738	0.230552	0.0229701	-0.104971	-0.339113	-0.345175	-1.64331	0.383669	0.0369738	0.285166	-0.339113	0.0796944	0.591239	-0.263086	1	-1.64331	0.697885	0.0968321	5857620	0.136965	1.59905	0.116017	13	13	12	57	57	54.1	27.708	0	121.69	5350400000	2691200000	2659200000	1	1	1	2	1	1	1	3	2
F1M4W7	F1M4W7;A0A096MJD1;A0A096MJQ0	Cstf3	ENSRNOG00000012089		0.399938	0.471209	0.216945	-0.267625	-0.110855	0.777535	0.489204	0.250819	0.435574	0.0519678	-0.110855	0.742304	0.489204	0.0799088	0.591239	0.505853	1	0.435574	1	-0.0538449	101211000	0.263753	0.0503961	0.247264	13	13	13	30.4	30.4	30.4	72.166	0	132.63	6080200000	2633100000	3447100000	9	9	8	3	7	4	5	7	5
D3ZMZ9	D3ZMZ9	Gnl3l	ENSRNOG00000002509		0.392791	-0.178953	0.0239903	0.484067	0.0765699	0.292897	0.628226	0.256825	0.106919	0.772152	0.0765699	0.312098	0.292897	0.0799658	0.591239	0.392649	1	0.106919	0.719194	0.194876	20785100	0.204811	0.404284	0.251823	11	10	10	28.2	27	27	65.278	0	34.09	1912400000	823790000	1088600000	2	4	3	3	3	2	2	3	3
Q63186	Q63186;A0A096MIS3	Eif2b4	ENSRNOG00000005301	Translation initiation factor eIF-2B subunit delta	-0.16513	-2.12029	-0.148177	0.318683	0.418722	0.132682	0.278505	0.42305	-1.14271	0.450519	0.318683	0.377698	0.278505	0.0800973	0.591239	0.278079	1	-1.14271	0.760802	0.196409	36364300	0.145185	1.38251	0.302584	12	12	12	35.3	35.3	35.3	57.809	0	98.137	3060600000	1553500000	1507100000	4	4	5	4	4	3	2	5	3
A0A0G2K9T4	A0A0G2K9T4;A0A0G2JWA8	Macf1			0.330177	-0.0371723	0.383274	0.186741	0.00410581	0.184579	0.202125	0.0596609	0.146503	0.571372	0.186741	0.222572	0.184579	0.0800999	0.591239	0.148788	1	0.146503	0.667493	0.191374	NaN	0.0776835	0.259755	0.189626	65	65	2	12.4	12.4	0.4	835.1	0	220.89	6506600000	3191500000	3315100000	13	12	10	11	16	9	8	13	9
D3ZTJ7	D3ZTJ7	Kdm2a	ENSRNOG00000019145		0.461178	0.0971967	-0.18835	0.398144	0.131944	0.805294	0.31217	0.396372	0.279188	0.367763	0.131944	0.570883	0.396372	0.0802705	0.591239	0.504612	1	0.279188	0.891736	0.113912	226436000	0.26378	0.257374	0.293663	11	11	11	11.4	11.4	11.4	132.71	0	22.374	1538300000	622280000	916060000	3	5	6	2	5	5	2	4	3
A0A0G2JYD8	A0A0G2JYD8;G3V7U6;Q8R4C0	Capn5	ENSRNOG00000014251	Calpain-5	-0.204857	-0.724504	0.261919	-0.0788283	-0.345141	-0.262463	-0.272446	-0.081497	-0.46468	0.324572	-0.0788283	0.787549	-0.262463	0.0803661	0.591239	-0.205469	1	-0.46468	1	-0.0540168	169278000	0.107479	0.367446	0.304289	27	27	27	57.3	57.3	57.3	73.211	0	249.94	26274000000	12517000000	13757000000	14	15	16	14	15	14	6	10	4
Q05175	Q05175	Basp1		Brain acid soluble protein 1	0.786537	0.822201	-0.636177	-1.07433	-0.331957	0.157988	0.463171	0.542159	0.804369	0.014111	-0.636177	0.087249	0.463171	0.0803943	0.591239	0.387773	1	0.804369	0.61309	-0.680821	NaN	0.20288	0.0252184	0.373195	5	5	2	35.9	35.9	10.9	21.79	0	127.3	1648200000	754790000	893430000	3	3	2	1	2	3	1	2	1
D4A106	D4A106	Wdr3	ENSRNOG00000019670		0.217459	0.226313	-0.0742382	-0.518971	-0.503348	0.189066	0.0792927	0.264522	0.221886	0.0127001	-0.503348	0.128894	0.189066	0.0807145	0.591239	0.177627	1	0.221886	0.638884	-0.365519	221899000	0.0931429	0.00626079	0.252377	34	34	34	55.3	55.3	55.3	106.07	0	323.31	27616000000	12971000000	14646000000	23	21	19	15	16	21	13	15	14
Q3B8N8	Q3B8N8	Pes1	ENSRNOG00000004515	Pescadillo homolog	-0.0672911	0.233617	-0.383888	-0.731526	-0.407283	0.0859206	0.126664	0.238143	0.0831629	0.678539	-0.407283	0.04554	0.126664	0.0807501	0.591239	0.150242	1	0.0831629	0.609869	-0.507565	84895300	0.0788028	0.212774	0.194308	21	21	21	45.7	45.7	45.7	67.603	0	323.31	57356000000	24428000000	32927000000	14	15	14	16	15	13	16	14	15
P11507-2	P11507-2;P11507;M0RCD2	Atp2a2	ENSRNOG00000047124	Sarcoplasmic/endoplasmic reticulum calcium ATPase 2	-0.0931316	-0.714313	0.258877	0.0784412	-0.0475201	-0.190548	-0.17053	-0.0555072	-0.403722	0.417463	0.0784412	0.39079	-0.17053	0.0808362	0.591239	-0.138862	1	-0.403722	0.769315	0.0965995	204836000	0.0728776	0.439241	0.154004	42	42	28	47.6	47.6	31.4	109.68	0	323.31	92048000000	43217000000	48831000000	30	28	29	28	27	26	25	26	26
Q6Q0N3	Q6Q0N3	Nt5dc2	ENSRNOG00000018358	5'-nucleotidase domain-containing protein 2	-0.168707	-1.13116	0.247806	0.978155	0.362896	-0.506308	-0.1479	-0.460151	-0.649931	0.405746	0.362896	0.144547	-0.460151	0.0808555	0.591239	-0.371453	1	-0.649931	0.641577	0.529619	7141050	0.194973	0.680554	0.392683	12	12	12	33.5	33.5	33.5	63.652	0	18.823	1347300000	591690000	755660000	4	5	3	4	3	3	1	0	2
D4A1H8	D4A1H8	Pwp1	ENSRNOG00000005350		-0.141122	0.598341	-0.224083	-0.383578	-0.398274	0.172551	0.280224	0.499507	0.228609	0.647456	-0.383578	0.0265714	0.280224	0.0808621	0.591239	0.317427	1	0.228609	0.609869	-0.335312	24138900	0.166623	0.52288	0.0966069	11	11	11	32.2	32.2	32.2	55.809	0	172.06	8414500000	4144000000	4270500000	7	8	3	5	3	3	3	1	5
D4AA31	D4AA31	Prcp	ENSRNOG00000010630		0.141694	NaN	0.406319	NaN	0.144699	-0.753996	-0.975841	NaN	0.141694	1	0.275509	0.282201	-0.864918	0.0812011	0.591239	-0.864918	1	0.141694	0.697885	0.275509	163945000	0.156869	NaN	0.184993	3	3	3	11.2	11.2	11.2	55.562	0	19.824	279430000	130750000	148680000	1	1	1	1	1	0	0	0	0
F1LRI5	F1LRI5	Gcn1l1	ENSRNOG00000021871		-0.485992	-1.99523	-0.317204	0.555471	0.443551	-0.258115	-0.172352	-0.0793346	-1.24061	0.347896	0.443551	0.494285	-0.172352	0.0812039	0.591239	-0.169934	1	-1.24061	0.837297	0.227272	48527300	0.0894148	1.06719	0.47484	94	94	94	49	49	49	293.07	0	323.31	34897000000	15036000000	19862000000	36	36	30	35	31	31	23	24	16
Q56R18	Q56R18	Kpna3	ENSRNOG00000014945	Importin subunit alpha	0.270471	-0.385484	0.116656	0.0526583	0.0814166	0.277246	0.233271	0.0797553	-0.0575068	0.8895	0.0814166	0.0456947	0.233271	0.0814202	0.591239	0.196757	1	-0.0575068	0.609869	0.0835768	45502400	0.103685	0.46383	0.0320533	15	15	12	46.8	46.8	37	57.772	0	323.31	30347000000	13261000000	17086000000	12	11	9	11	8	11	5	5	7
Q498C8	Q498C8	Rer1	ENSRNOG00000014270	Protein RER1	-0.187073	-0.589143	0.120351	0.155832	-0.156907	-0.298317	-0.180726	-0.528803	-0.388108	0.304263	0.120351	0.726481	-0.298317	0.081444	0.591239	-0.335949	1	-0.388108	0.998493	0.0397584	175933000	0.177064	0.284307	0.171239	4	4	4	29.6	29.6	29.6	22.988	0	112.29	9039800000	4431700000	4608100000	2	4	3	4	4	3	2	3	3
D4ADI8	D4ADI8	Cdca2	ENSRNOG00000025302		0.756938	3.97233	0.299714	-0.507132	NaN	0.856664	1.95502	2.83917	2.36463	0.380127	-0.103709	0.839811	1.95502	0.0815032	0.591239	1.88362	1	2.36463	1	-0.103709	47186200	0.993181	2.27362	0.570526	8	8	8	17.1	17.1	17.1	106.82	0	39.685	223390000	67173000	156220000	5	3	1	2	0	2	1	1	2
F1M0V4	F1M0V4;A0A0G2K8V3	Thoc2	ENSRNOG00000007315		0.095116	0.203259	0.052839	-0.385954	-0.45273	0.282681	0.21224	0.0825593	0.149187	0.221361	-0.385954	0.240348	0.21224	0.0815245	0.591239	0.192494	1	0.149187	0.669577	-0.261948	128247000	0.101512	0.0764684	0.274651	37	37	16	29.8	29.8	14.9	182.73	0	323.31	23885000000	11625000000	12260000000	18	17	15	15	12	17	8	10	13
D4A5K7	D4A5K7;A0A0G2JVD0	Rbm28	ENSRNOG00000005468		0.139387	0.428965	-0.317439	-0.701588	-0.589816	0.0562017	0.189085	0.187944	0.284176	0.299989	-0.589816	0.0423941	0.187944	0.0819739	0.593596	0.14441	1	0.284176	0.609869	-0.536281	56166300	0.076393	0.204762	0.197591	19	19	19	29.3	29.3	29.3	84.372	0	323.31	20073000000	9911500000	10162000000	10	9	8	9	9	10	9	10	9
Q3MIB4	Q3MIB4;F7FF30	Lonp2	ENSRNOG00000015162	Lon protease homolog 2, peroxisomal	-0.224523	-0.919051	-0.674594	0.38362	-0.284704	-0.268275	-0.939121	-0.759315	-0.571787	0.347463	-0.284704	0.597919	-0.759315	0.0821616	0.594053	-0.65557	1	-0.571787	0.911296	-0.191893	32410000	0.347247	0.491106	0.535177	12	12	12	19.2	19.2	19.2	94.392	0	18.577	967630000	506420000	461220000	2	3	3	1	3	1	2	2	3
A0A0G2KB10	A0A0G2KB10;D4A5H6	Setd2	ENSRNOG00000020915	Histone-lysine N-methyltransferase	0.958868	1.22053	0.557942	0.550236	-0.164967	1.07557	1.00007	0.309135	1.0897	0.0760694	0.550236	0.319972	1.00007	0.0826205	0.595594	0.794926	1	1.0897	0.720403	0.314404	118163000	0.422398	0.185023	0.415165	9	9	9	5.7	5.7	5.7	283.97	0	85.816	628630000	228860000	399780000	4	3	2	4	3	4	1	1	1
D3ZHA1	D3ZHA1	B3gnt1	ENSRNOG00000020110;ENSRNOG00000046904		NaN	-1.2059	NaN	-5.31347	0.0143281	-0.0992781	-0.0763412	NaN	-1.2059	1	-2.64957	0.501717	-0.0878096	0.0826782	0.595594	-0.0878096	1	-1.2059	0.841692	-2.64957	227301000	0.0162188	NaN	3.76732	3	3	3	13.5	13.5	13.5	47.47	0	7.1521	661640000	583550000	78099000	0	2	1	0	0	0	0	0	2
O70377	O70377;M0R4V3;F8WG75	Snap23	ENSRNOG00000006037;ENSRNOG00000050552	Synaptosomal-associated protein;Synaptosomal-associated protein 23	-0.324089	0.551773	0.0767996	-0.0101241	-0.375133	-0.163219	-0.477211	-0.262902	0.113842	0.838092	-0.0101241	0.535076	-0.262902	0.0830247	0.595594	-0.301111	1	0.113842	0.864426	-0.102819	127489000	0.160445	0.619328	0.239802	9	9	8	67.1	67.1	62.4	23.235	0	33.243	1602300000	810280000	792070000	2	1	4	3	3	2	0	2	2
F7ENH8	F7ENH8	Hdac2	ENSRNOG00000000604	Histone deacetylase	0.270264	0.109353	-0.172594	-0.111269	-0.0888391	0.286508	0.386435	0.110877	0.189808	0.255232	-0.111269	0.0382818	0.286508	0.0833221	0.595594	0.261273	1	0.189808	0.609869	-0.124234	44812000	0.139501	0.113781	0.0433563	13	9	9	42.2	33	33	55.345	0	120.68	9322500000	4343700000	4978700000	10	9	7	8	6	7	9	9	9
A0A0G2JTD1	A0A0G2JTD1	Rprd2			1.39384	0.932751	-0.171746	-0.269107	-0.52488	0.520538	1.81591	1.34911	1.1633	0.124553	-0.269107	0.092415	1.34911	0.0833465	0.595594	1.22852	1	1.1633	0.615282	-0.321911	NaN	0.656051	0.326039	0.182393	19	19	19	22.8	22.8	22.8	154.31	0	71.875	2058400000	946110000	1112300000	8	7	4	2	4	5	1	1	4
Q711G3	Q711G3	Iah1	ENSRNOG00000007379	Isoamyl acetate-hydrolyzing esterase 1 homolog	0.268554	0.273217	-0.00133306	0.0566939	0.311736	NaN	-0.894563	-0.685942	0.270886	0.00547966	0.0566939	0.331097	-0.790252	0.0835488	0.595594	-0.790252	1	0.270886	0.72296	0.122365	60260800	0.147518	0.00329751	0.166546	6	6	6	32.5	32.5	32.5	28.004	0	40.197	809480000	399310000	410170000	0	0	0	1	1	0	0	1	0
F1LQT9	F1LQT9;D3ZS06;Q9Z330;Q9Z330-2;Q9Z330-5;Q9Z330-9;Q9Z330-3;Q9Z330-7;Q9Z330-6;Q9Z330-4;Q9Z330-8	Dnmt1	ENSRNOG00000039859	DNA (cytosine-5)-methyltransferase;DNA (cytosine-5)-methyltransferase 1	0.120614	-0.208923	0.389048	0.0678465	-0.0505676	0.355764	0.100185	0.281256	-0.0441543	0.833317	0.0678465	0.410784	0.281256	0.0835843	0.595594	0.245735	1	-0.0441543	0.778189	0.135442	21978800	0.13144	0.233018	0.22747	46	46	46	39.8	39.8	39.8	183.04	0	323.31	29820000000	13713000000	16107000000	25	26	25	23	23	27	24	20	22
M0R402	M0R402	Tmx3	ENSRNOG00000045740		-0.00912956	-0.678201	0.0431048	0.0745054	-0.163711	-0.453313	-0.205793	-0.182114	-0.343665	0.491431	0.0431048	0.856097	-0.205793	0.0838028	0.595594	-0.280407	1	-0.343665	1	-0.015367	86613000	0.150209	0.473105	0.129426	13	13	13	35.9	35.9	35.9	52.1	0	169.36	5226500000	2751500000	2474900000	7	8	5	4	5	4	5	6	6
Q63801	Q63801;Q498R0	Taf6	ENSRNOG00000001355	Transcription initiation factor TFIID subunit 6	0.0391182	0.0923149	0.187582	0.0198716	-0.222283	0.430275	0.71581	0.227484	0.0657165	0.244837	0.0198716	0.970631	0.430275	0.083841	0.595594	0.457856	1	0.0657165	1	-0.00494332	21378000	0.245329	0.0376157	0.206056	13	13	13	30.7	30.7	30.7	72.713	0	51.947	2309100000	1041500000	1267500000	2	6	3	1	3	3	2	1	2
Q91XU1	Q91XU1;A0A0G2JUS0;D4A2X0;F1LMH5;A0A0G2JXZ5	Qki	ENSRNOG00000048297	Protein quaking	0.281079	-0.280042	-0.0627001	-0.106294	-0.303103	0.584574	0.200334	0.316255	0.000518635	0.998823	-0.106294	0.167137	0.316255	0.0841541	0.595594	0.367054	1	0.000518635	0.64184	-0.157366	52259900	0.197093	0.396772	0.128081	8	8	8	27.3	27.3	27.3	37.642	0	34.448	6078700000	2790200000	3288600000	4	5	2	1	4	2	3	4	3
A0A140TAD2	A0A140TAD2;Q62673	Plk1		Serine/threonine-protein kinase PLK1	0.329358	NaN	1.33685	NaN	-0.228621	0.253626	0.194087	NaN	0.329358	1	0.554117	0.607828	0.223857	0.0841669	0.595594	0.223857	1	0.329358	0.917212	0.554117	NaN	0.0421005	NaN	1.10696	7	7	7	18.6	18.6	18.6	68.264	0	20.771	317130000	138260000	178870000	2	0	0	1	2	2	0	0	0
Q6AYA5	Q6AYA5;Q6TUE3	Tmem106b	ENSRNOG00000006206	Transmembrane protein 106B	0.20941	NaN	-0.619758	NaN	-0.100912	-0.167043	NaN	-0.127809	0.20941	1	-0.360335	0.397244	-0.147426	0.0842141	0.595594	-0.147426	1	0.20941	0.770119	-0.360335	39352500	0.027742	NaN	0.36688	5	5	5	22.5	22.5	22.5	31.152	0	13.336	631960000	323630000	308330000	1	1	1	0	1	1	1	0	0
Q499Q4	Q499Q4;P38652	Pgm1	ENSRNOG00000009889	Phosphoglucomutase-1	-2.41559	-0.709547	-0.738987	-0.0695064	0.38405	-1.56226	-2.00674	-0.562195	-1.56257	0.318117	-0.0695064	0.706777	-1.56226	0.0842415	0.595594	-1.37707	1	-1.56257	0.985317	-0.141481	122649000	0.739866	1.20635	0.564967	14	14	14	37.7	37.7	37.7	61.389	0	57.248	922390000	484060000	438340000	0	1	1	1	1	1	2	1	3
D3ZHM7	D3ZHM7	Dnttip2	ENSRNOG00000025025		0.954353	1.00242	-0.127159	-0.289695	-0.403876	0.543071	0.523002	1.25369	0.978386	0.0156343	-0.289695	0.0763876	0.543071	0.0845043	0.595594	0.773254	1	0.978386	0.609869	-0.273577	243890000	0.41619	0.0339868	0.139061	24	24	24	40.7	40.7	40.7	84.784	0	323.31	12945000000	5436000000	7508600000	7	10	9	9	10	7	11	10	15
D3ZUW8	D3ZUW8;A0A0U1RS12;D3ZMD3	Brd1	ENSRNOG00000004538;ENSRNOG00000028641		0.034576	-0.236386	0.398508	-0.272671	-0.426552	0.182989	0.0920585	0.29706	-0.100905	0.592462	-0.272671	0.730527	0.182989	0.084614	0.595594	0.190702	1	-0.100905	1	-0.100238	68837000	0.102718	0.191599	0.438727	16	16	16	16.6	16.6	16.6	119.77	0	43.871	2252500000	1047100000	1205400000	3	6	5	4	5	6	2	3	4
B0BND9	B0BND9	Srp72	ENSRNOG00000002100		0.129957	-0.972414	-0.0540611	0.331646	0.354684	0.0755519	0.213503	0.271482	-0.421229	0.584579	0.331646	0.252857	0.213503	0.0846256	0.595594	0.186846	1	-0.421229	0.672969	0.210756	33237700	0.100649	0.779494	0.229628	5	1	1	31.2	7.6	7.6	24.609	0	24.354	1354100000	622480000	731630000	3	3	3	3	2	4	1	2	2
D4ABI7	D4ABI7	Hacd3	ENSRNOG00000030232		-0.0720304	-1.00313	0.310088	0.161885	-0.0733803	-0.214993	-0.10737	-0.0783599	-0.53758	0.454365	0.161885	0.356134	-0.10737	0.0846969	0.595594	-0.133574	1	-0.53758	0.742885	0.132864	70170500	0.0719874	0.658386	0.193374	11	11	11	32	32	32	43.104	0	142.1	25012000000	11767000000	13245000000	7	7	9	8	7	5	6	8	5
Q6AY72	Q6AY72		ENSRNOG00000016399	UPF0449 protein C19orf25 homolog	0.130665	NaN	0.204315	0.536298	0.365008	0.43539	0.569977	NaN	0.130665	1	0.365008	0.0614721	0.502684	0.0847197	0.595594	0.502684	1	0.130665	0.609869	0.36854	12426200	0.0951674	NaN	0.166019	3	3	3	54.1	54.1	54.1	12.142	0	34.394	429900000	163520000	266380000	2	2	2	0	1	1	0	0	0
A9UMV2	A9UMV2;A0A0G2K9G3	Mrps24	ENSRNOG00000011979		NaN	1.61108	-0.178861	-0.122981	-0.0540777	-0.274705	-0.993063	-0.80635	1.61108	1	-0.122981	0.0813867	-0.80635	0.084746	0.595594	-0.691373	1	1.61108	0.61309	-0.11864	86640000	0.372725	NaN	0.0625049	3	3	3	22.2	22.2	22.2	18.742	0	11.049	636940000	328310000	308630000	1	2	0	1	0	0	1	1	1
Q5XIB8	Q5XIB8	Tinf2	ENSRNOG00000020189		0.212195	0.828711	NaN	NaN	0.0678644	0.767074	0.214797	0.572017	0.520453	0.340419	0.0678644	1	0.572017	0.0851933	0.596383	0.517962	1	0.520453	1	0.0678644	38251000	0.280078	0.435942	NaN	6	6	6	22.9	22.9	22.9	44.404	0	10.933	679230000	279050000	400180000	1	1	1	1	1	2	0	1	1
Q810T5-2	Q810T5-2;Q810T5;A0A0G2K9F0;D3ZCG0	Kat7	ENSRNOG00000022664	Histone acetyltransferase;Histone acetyltransferase KAT7	-0.0101512	0.239457	0.0206878	-0.252669	-0.510543	0.22097	0.134084	0.401442	0.114653	0.526972	-0.252669	0.247928	0.22097	0.0852236	0.596383	0.252165	1	0.114653	0.672969	-0.247508	82905400	0.136381	0.1765	0.265653	15	15	14	38	38	36.1	66.818	0	212.51	9459200000	4839800000	4619400000	11	8	7	7	8	7	5	4	6
P10158	P10158	Fosl1	ENSRNOG00000020552	Fos-related antigen 1	-0.0979495	1.56384	0.332193	-0.333234	-0.189688	0.555472	0.568616	0.16081	0.732946	0.539822	-0.189688	0.782945	0.555472	0.0852905	0.596383	0.428299	1	0.732946	1	-0.0635764	227756000	0.231746	1.17506	0.35018	3	3	3	17.1	17.1	17.1	30.115	0	35.637	2119700000	973210000	1146500000	2	1	2	1	1	0	1	2	1
Q2EJA0	Q2EJA0;A0A0G2K0Y6;Q2EJA0-4;Q2EJA0-2;Q2EJA0-3	Yap1		Transcriptional coactivator YAP1	NaN	NaN	NaN	NaN	0.666962	0.612773	1.03959	1.85973	NaN	1	0.666962	1	1.03959	0.0853582	0.596383	1.1707	1	NaN	1	0.666962	NaN	0.633733	NaN	NaN	7	7	3	25.2	25.2	11.3	50.501	0	62.649	236320000	105210000	131110000	1	1	1	1	0	0	1	0	0
A0A0G2K214	A0A0G2K214	Zc3h7			-0.675765	-1.43827	NaN	NaN	NaN	-0.403859	-0.714941	-0.232396	-1.05702	0.220374	NaN	1	-0.403859	0.0858505	0.597272	-0.450399	1	-1.05702	1	NaN	NaN	0.244616	0.539171	NaN	5	5	5	7.5	7.5	7.5	110.4	0	5.6609	293780000	153730000	140050000	2	3	0	1	0	3	1	1	0
A0A0G2K1V3	A0A0G2K1V3;D3ZFW1	Tsen15	ENSRNOG00000002352		-1.12447	-1.78314	NaN	NaN	NaN	NaN	-0.337839	-0.444086	-1.45381	0.141822	NaN	1	-0.390963	0.0859759	0.597272	-0.390963	1	-1.45381	1	NaN	74737200	0.0751274	0.46575	NaN	2	2	2	20.2	20.2	20.2	18.543	0	32.134	146380000	86341000	60039000	0	0	2	1	2	1	0	1	1
B0BNK1	B0BNK1;Q6IN17	Rab5c	ENSRNOG00000018568		-0.159617	-0.355585	0.155049	-0.106109	-0.171638	-0.212158	-0.182239	-0.0576445	-0.257601	0.231394	-0.106109	0.721627	-0.182239	0.0860568	0.597272	-0.150681	1	-0.257601	0.995837	-0.0408993	88416100	0.0819484	0.138571	0.17283	9	9	6	66.2	66.2	51.4	23.425	0	195.27	43062000000	21542000000	21520000000	6	7	6	7	6	6	8	7	8
B1WC01	B1WC01	Kif20a	ENSRNOG00000024428	Kinesin-like protein	0.331956	1.00906	0.823698	0.0512647	-0.413508	0.350109	0.128242	0.464569	0.670509	0.297668	0.0512647	0.711381	0.350109	0.0861103	0.597272	0.314307	1	0.670509	0.987122	0.153818	27137700	0.170998	0.478786	0.624946	21	21	21	32.9	32.9	32.9	100.02	0	135.42	3175400000	1421100000	1754300000	6	10	5	4	5	7	4	9	8
B1WC03	B1WC03	Aar2	ENSRNOG00000020086		0.0703098	NaN	0.185105	0.449502	-0.0459377	-0.478459	-0.352934	-0.132769	0.0703098	1	0.185105	0.30396	-0.352934	0.0862314	0.597272	-0.321387	1	0.0703098	0.71557	0.196223	159044000	0.174991	NaN	0.247907	5	5	5	19.5	19.5	19.5	43.547	0	9.7391	362130000	134160000	227970000	1	1	0	2	2	2	1	1	0
D3ZEH2	D3ZEH2	Foxred1	ENSRNOG00000010372		0.266157	-0.519014	-0.286005	NaN	NaN	-0.357955	-0.259824	-0.721611	-0.126428	0.801659	-0.286005	1	-0.357955	0.08635	0.597272	-0.446463	1	-0.126428	1	-0.286005	36421200	0.243284	0.555199	NaN	4	4	4	16.4	16.4	16.4	54.229	0	10.704	88324000	38504000	49819000	1	2	1	1	1	1	1	1	1
A0A0G2JW34	A0A0G2JW34	Cisd3			0.129613	-0.860924	0.215602	0.534956	0.208458	-0.214835	-0.0692399	-0.256339	-0.365655	0.595129	0.215602	0.0971746	-0.214835	0.0864994	0.597272	-0.180138	1	-0.365655	0.622077	0.319672	NaN	0.0982569	0.700415	0.186476	1	1	1	10.2	10.2	10.2	14.379	0	9.7508	1996500000	867020000	1129500000	1	1	1	1	1	1	1	0	1
Q71TY3	Q71TY3;M0RA26	Rps27	ENSRNOG00000016961;ENSRNOG00000021159	40S ribosomal protein S27	-0.150316	0.588547	-0.150127	0.326712	0.142064	0.0994602	0.0910303	0.226344	0.219116	0.659191	0.142064	0.52413	0.0994602	0.0865379	0.597272	0.138945	1	0.219116	0.857438	0.106216	109367000	0.0758073	0.522455	0.240432	4	4	2	39.3	39.3	14.3	9.461	0	46.642	24552000000	12162000000	12391000000	3	3	3	3	3	3	2	2	3
P62634	P62634	Cnbp	ENSRNOG00000010239	Cellular nucleic acid-binding protein	-0.14055	-1.87478	0.0736473	0.453004	0.223161	0.0794166	0.138217	0.245655	-1.00767	0.452362	0.223161	0.151718	0.138217	0.086612	0.597272	0.154429	1	-1.00767	0.64184	0.249937	184999000	0.0842968	1.22629	0.19109	6	6	6	43.5	43.5	43.5	19.463	0	247.94	11610000000	5496000000	6113600000	5	5	4	3	4	4	4	3	1
P63155	P63155;A0A0G2K5Q2	Crnkl1	ENSRNOG00000010587	Crooked neck-like protein 1	-0.0956279	0.22843	-0.0445694	-0.251943	-0.127584	0.293714	0.11579	0.131223	0.0664008	0.752397	-0.127584	0.143577	0.131223	0.0868968	0.597417	0.180242	1	0.0664008	0.641577	-0.141366	146547000	0.0985719	0.229143	0.104372	23	23	23	39.4	39.4	39.4	83.415	0	129.07	11112000000	5398300000	5713600000	10	9	6	12	9	8	12	13	13
P51635	P51635	Akr1a1	ENSRNOG00000016727	Alcohol dehydrogenase [NADP(+)]	-1.10041	-2.85129	-0.0920754	0.228268	0.468263	-0.546444	-1.11701	-0.4045	-1.97585	0.265519	0.228268	0.340313	-0.546444	0.0869586	0.597417	-0.689319	1	-1.97585	0.731191	0.201485	139278000	0.377133	1.23806	0.281128	19	19	19	72.6	72.6	72.6	36.505	0	257.14	17523000000	9266600000	8256500000	2	2	2	3	3	2	8	11	5
Q9QZM5	Q9QZM5;A2VD09;F1LYA6	Abi1	ENSRNOG00000017707;ENSRNOG00000031325	Abl interactor 1	0.240573	-0.688165	-0.240077	0.266037	0.214045	-0.0835091	-0.218385	-0.100391	-0.223796	0.714099	0.214045	0.668029	-0.100391	0.0872047	0.597417	-0.134095	1	-0.223796	0.961066	0.0800015	79315500	0.0734834	0.656717	0.278413	9	9	9	20.4	20.4	20.4	51.704	0	58.193	1887500000	1321700000	565780000	1	1	1	1	2	3	0	1	3
D3Z8G8	D3Z8G8	Mau2	ENSRNOG00000020526		NaN	-0.192431	0.048009	-0.119952	-0.333113	0.284744	0.252454	0.640158	-0.192431	1	-0.119952	0.345468	0.284744	0.0872505	0.597417	0.392452	1	-0.192431	0.734985	-0.135019	21047400	0.215126	NaN	0.191007	8	8	8	18.7	18.7	18.7	69.579	0	41.801	913130000	395880000	517250000	2	3	1	1	1	1	0	1	1
Q8CIR5	Q8CIR5	Mnat1	ENSRNOG00000007267		0.446351	-0.213922	0.284869	NaN	-0.249763	0.608564	0.450221	1.24813	0.116214	0.784522	0.0175535	0.958256	0.608564	0.0875861	0.597417	0.768971	1	0.116214	1	0.0175535	105443000	0.422447	0.466884	0.378042	9	9	9	46.9	46.9	46.9	35.812	0	34.396	864500000	384960000	479540000	3	2	2	1	1	2	1	2	0
Q5RKI1	Q5RKI1;A0A0G2K8B7	Eif4a2	ENSRNOG00000001815	Eukaryotic initiation factor 4A-II;Eukaryotic initiation factor 4A-II, N-terminally processed	-0.45752	-2.77398	-0.361609	0.240452	0.567845	-0.0652425	-0.0482711	-0.133836	-1.61575	0.395937	0.240452	0.639237	-0.0652425	0.0876149	0.597417	-0.08245	1	-1.61575	0.937731	0.148896	84411400	0.0453038	1.63799	0.471443	21	11	11	60.9	37.6	37.6	46.402	0	146.26	8203600000	3929100000	4274400000	9	9	10	10	11	12	9	8	9
Q9JJ50-2	Q9JJ50-2;Q9JJ50;A0A140TAH1	Hgs	ENSRNOG00000036696	Hepatocyte growth factor-regulated tyrosine kinase substrate	0.621806	0.396302	NaN	NaN	0.153261	1.23211	0.932212	NaN	0.509054	0.138767	0.153261	1	1.08216	0.0876541	0.597417	1.08216	1	0.509054	1	0.153261	109233000	0.212058	0.159455	NaN	10	10	10	22	22	22	85.746	0	52.564	893290000	442440000	450860000	1	0	2	0	1	0	0	0	2
D3ZGQ8	D3ZGQ8	Rsf1	ENSRNOG00000024194		-0.0495833	0.489242	0.0788782	-0.280826	-0.565415	0.584089	0.168901	0.625995	0.219829	0.5643	-0.280826	0.303645	0.584089	0.0876791	0.597417	0.459662	1	0.219829	0.715199	-0.255788	168756000	0.252677	0.381007	0.322876	26	26	26	28.2	28.2	28.2	146.34	0	323.31	7482400000	3385600000	4096800000	14	13	12	9	15	9	10	11	6
G3V8S0	G3V8S0	Spint2	ENSRNOG00000020636		-0.522872	-2.23345	1.05439	0.676558	0.0945381	-0.102409	-0.384919	-0.335153	-1.37816	0.353598	0.676558	0.161103	-0.335153	0.0877822	0.597417	-0.274161	1	-1.37816	0.64184	0.608496	88380000	0.150808	1.20956	0.483533	8	1	1	42	4.8	4.8	27.467	0.003595	2.8703	221570000	90564000	131000000	4	5	5	6	6	6	5	7	5
Q62667	Q62667;A0A140TAE0	Mvp	ENSRNOG00000020182	Major vault protein	-0.261981	0.787076	0.547236	0.281352	0.445572	-0.296248	-0.355384	-0.777098	0.262548	0.704558	0.445572	0.0316888	-0.355384	0.08793	0.597417	-0.476243	1	0.262548	0.609869	0.42472	205401000	0.26222	0.741795	0.134163	18	18	18	32.9	32.9	32.9	95.797	0	73.244	4967200000	2640200000	2327000000	4	4	4	7	5	6	3	5	1
O70595	O70595;A0A0G2K4U1	Abcb6	ENSRNOG00000018697	ATP-binding cassette sub-family B member 6, mitochondrial	-1.17075	-1.05586	NaN	0.906429	NaN	-0.749087	-0.5661	NaN	-1.11331	0.0328196	0.906429	1	-0.657594	0.0880101	0.597417	-0.657594	1	-1.11331	1	0.906429	82143200	0.129391	0.0812395	NaN	4	4	4	11.8	11.8	11.8	93.304	0.00044504	4.9523	63249000	29212000	34037000	1	0	1	0	0	1	0	0	1
Q63584	Q63584	Tmed10	ENSRNOG00000007901	Transmembrane emp24 domain-containing protein 10	-0.0219082	-0.633876	0.285676	0.331066	-0.00669769	-0.0939507	-0.0710351	-0.195746	-0.327892	0.478006	0.285676	0.194643	-0.0939507	0.0883388	0.598459	-0.120244	1	-0.327892	0.651816	0.203348	116348000	0.0663829	0.432726	0.183315	6	6	6	32	32	32	24.857	0	167.93	28434000000	14236000000	14198000000	6	6	5	6	6	6	5	6	6
P0C5H9	P0C5H9	Manf	ENSRNOG00000014201	Mesencephalic astrocyte-derived neurotrophic factor	-0.456886	-0.406555	0.355424	0.419261	0.0350147	-0.162699	-0.488998	-0.258941	-0.431721	0.0370674	0.355424	0.151202	-0.258941	0.0884144	0.598459	-0.303546	1	-0.431721	0.64184	0.2699	114982000	0.167661	0.0355895	0.205905	9	9	9	43.6	43.6	43.6	20.388	0	68.003	27171000000	11986000000	15186000000	6	8	7	6	6	7	6	7	5
M0RDL0	M0RDL0;A0A096MKA6;M0R6B0;A0A096MJ70	Prdm16	ENSRNOG00000045913		0.0721723	-2.18772	-0.0771973	0.377769	0.33178	0.389987	0.118851	0.229202	-1.05777	0.520994	0.33178	0.282271	0.229202	0.0889415	0.600599	0.246014	1	-1.05777	0.697885	0.210784	175138000	0.136348	1.59798	0.250457	2	1	1	1.9	0.9	0.9	110.18	0.00044464	4.9086	15743000000	6830900000	8911700000	2	1	1	1	1	1	1	1	1
M0RBF0	M0RBF0;A0A0G2JZI0;O88453;A0A0G2JW97	Safb	ENSRNOG00000050543	Scaffold attachment factor B1	0.684497	0.577565	0.147523	-0.447296	-0.440712	1.38329	0.819779	0.418835	0.631031	0.053811	-0.440712	0.33721	0.819779	0.0889823	0.600599	0.873968	1	0.631031	0.72945	-0.246828	9447350	0.484505	0.0756124	0.341534	25	25	18	32	32	23.7	104.41	0	323.31	45283000000	20517000000	24767000000	17	15	16	14	15	16	17	16	17
Q5BJQ7	Q5BJQ7;A0A0H2UHC2;Q5BJQ7-2	Tada1	ENSRNOG00000003816	Transcriptional adapter 1	-0.735764	NaN	0.123931	-0.834442	-0.7859	-1.67181	-0.486368	-1.85058	-0.735764	1	-0.7859	0.250658	-1.67181	0.0891175	0.600662	-1.33625	1	-0.735764	0.672969	-0.498804	89462800	0.741431	NaN	0.53985	3	3	3	8.4	8.4	8.4	37.475	0.0060089	2.5002	125390000	82055000	43333000	1	1	0	1	1	0	0	1	0
B0BMX3	B0BMX3	S100a16	ENSRNOG00000012053		-0.555232	-2.16497	0.637971	-0.235705	-0.016763	-0.0993895	-0.375876	-0.351031	-1.3601	0.340176	-0.016763	0.672848	-0.351031	0.0892566	0.600751	-0.275432	1	-1.3601	0.962705	0.128501	209356000	0.152963	1.13825	0.454592	6	6	6	54.5	54.5	54.5	14.224	0	85.634	15526000000	8624000000	6902300000	3	3	4	5	3	3	4	2	4
Q5U2M8	Q5U2M8	Mdc1		Mediator of DNA damage checkpoint protein 1	0.695816	0.390338	-0.0300252	0.341667	0.177291	0.338014	NaN	0.449879	0.543077	0.174539	0.177291	0.268872	0.393947	0.0897868	0.602692	0.393947	1	0.543077	0.687449	0.162977	NaN	0.0791002	0.216006	0.186259	12	12	12	15.6	15.6	15.6	136.95	0	25.198	521310000	219460000	301850000	3	2	0	0	2	0	2	4	0
F1LSU6	F1LSU6;P63035;F1LQP0;P97696;A0A0G2K9V4;D3ZHR6	Cyth2	ENSRNOG00000001065;ENSRNOG00000007679;ENSRNOG00000021051	Cytohesin-2;Cytohesin-3	0.462635	0.346645	-0.132137	0.412937	0.169988	0.773237	0.237564	0.443713	0.40464	0.0906264	0.169988	0.441133	0.443713	0.0897975	0.602692	0.484838	1	0.40464	0.799806	0.150263	102875000	0.270194	0.0820174	0.273072	4	4	1	12	12	5	46.585	0.00044534	4.9549	537450000	226510000	310940000	1	0	1	0	1	1	0	1	0
A0A0G2K924	A0A0G2K924;Q7TP65-2;A0A0G2JXE5;Q7TP65	Ankle2		Ankyrin repeat and LEM domain-containing protein 2	-0.143867	0.875052	0.432104	0.525367	-0.3643	0.357629	0.778713	1.24154	0.365593	0.603738	0.432104	0.556186	0.778713	0.0899377	0.602785	0.792626	1	0.365593	0.88032	0.197724	NaN	0.442117	0.720485	0.488956	9	9	9	16	16	16	103.37	0	32.161	392490000	148380000	244110000	2	4	1	1	2	0	2	1	1
Q66H18	Q66H18;A0A0G2KA82	Sypl1	ENSRNOG00000009856		-0.302164	-0.392089	0.379679	0.262045	-0.251099	-0.423256	-0.142019	-0.545833	-0.347127	0.0820026	0.262045	0.570618	-0.423256	0.0902776	0.604214	-0.370369	1	-0.347127	0.891614	0.130208	61892000	0.207036	0.063586	0.335419	5	5	5	26.4	26.4	26.4	28.628	0	67.826	8194700000	3807000000	4387600000	3	3	3	4	2	2	2	2	2
B2GUU0	B2GUU0	Cactin			-0.0318429	-0.0549609	0.529139	-0.388943	0.121833	0.107595	NaN	0.143527	-0.0434019	0.165702	0.121833	0.773499	0.125561	0.0904777	0.604323	0.125561	1	-0.0434019	1	0.0873432	NaN	0.0254079	0.0163469	0.460012	7	7	7	12.7	12.7	12.7	89.383	0	14.071	734240000	353100000	381140000	1	2	0	1	0	4	1	1	1
A0A0G2JUD4	A0A0G2JUD4;A0A0G2K5C9;A0A0G2K763;A0A0G2K546	Larp3			0.128384	-0.55825	-0.0675016	-0.799563	-0.167256	-0.394038	-0.447367	-0.114421	-0.214933	0.643905	-0.167256	0.271442	-0.394038	0.09092	0.604323	-0.318609	1	-0.214933	0.689735	-0.344773	NaN	0.178831	0.485523	0.397005	3	3	3	13	13	13	43.991	0	18.13	1175800000	606810000	569000000	1	1	1	1	1	1	2	1	2
A0A0G2K1M7	A0A0G2K1M7;F1M5Z5	Ano6	ENSRNOG00000006995	Anoctamin	-0.0957203	-0.513427	0.0571693	-0.787066	-0.520751	-0.480537	-0.124005	-0.370147	-0.304574	0.382659	-0.520751	0.236297	-0.370147	0.0910608	0.604323	-0.324896	1	-0.304574	0.668431	-0.416883	136782000	0.182523	0.295363	0.431596	10	10	10	15.8	15.8	15.8	105.84	0	18.088	1630500000	823950000	806540000	4	2	3	3	1	2	3	1	1
Q6AYH5	Q6AYH5;A0A0G2JUC7	Dctn2	ENSRNOG00000025481	Dynactin subunit 2	-0.0772897	-0.957651	0.224921	0.666528	0.32741	0.393219	0.212096	0.125075	-0.51747	0.448731	0.32741	0.0930615	0.212096	0.0910861	0.604323	0.243463	1	-0.51747	0.615282	0.406286	70730200	0.136797	0.62251	0.231128	17	17	17	62.7	62.7	62.7	44.147	0	242.47	14305000000	6654900000	7649800000	7	7	8	7	7	6	6	10	6
Q5U367	Q5U367	Plod3	ENSRNOG00000001417	Procollagen-lysine,2-oxoglutarate 5-dioxygenase 3	-0.0357561	0.173209	0.477484	0.552348	0.111892	-0.151812	-0.166445	-0.0426905	0.0687263	0.629599	0.477484	0.107591	-0.151812	0.091132	0.604323	-0.120316	1	0.0687263	0.631155	0.380575	24728200	0.0676224	0.14776	0.235677	14	14	14	31.2	31.2	31.2	85.059	0	86.148	1912600000	774780000	1137800000	5	3	4	1	3	2	3	1	3
F1LQH9	F1LQH9	Bag2	ENSRNOG00000012709		-0.685733	0.654948	0.672018	0.15549	0.541689	0.151627	0.481299	0.59428	-0.0153925	0.985384	0.541689	0.0986733	0.481299	0.0911893	0.604323	0.409069	1	-0.0153925	0.626989	0.456399	38145400	0.229997	0.948004	0.268619	5	5	5	28.3	28.3	28.3	23.805	0	42.067	2309800000	1102000000	1207800000	1	1	0	1	0	1	1	1	1
Q6AYK9-2	Q6AYK9-2;Q6AYK9	Cdyl	ENSRNOG00000032215	Chromodomain Y-like protein	0.557476	0.268685	0.0472549	-0.44227	-0.448431	0.405201	0.488862	0.124328	0.41308	0.214083	-0.44227	0.229007	0.405201	0.0912632	0.604323	0.339464	1	0.41308	0.668431	-0.281149	31569700	0.190951	0.204206	0.284422	11	11	11	28.1	28.1	28.1	60.009	0	50.742	2479900000	1186100000	1293800000	5	5	1	3	3	6	0	2	1
O88656	O88656	Arpc1b	ENSRNOG00000000991	Actin-related protein 2/3 complex subunit 1B	-0.404432	-0.836136	0.218212	0.219954	-0.0625689	-0.159326	-0.301511	-0.0973222	-0.620284	0.213192	0.218212	0.313952	-0.159326	0.091307	0.604323	-0.186053	1	-0.620284	0.720403	0.125199	13321400	0.104685	0.305261	0.162614	15	15	14	57.3	57.3	51.1	41.056	0	323.31	47241000000	22311000000	24930000000	7	8	9	7	7	7	6	8	8
B1WBY5	B1WBY5	Dnajc11	ENSRNOG00000008802		-0.0188484	-1.05323	-0.0448919	0.138054	0.0740658	-0.285008	-0.0764268	-0.294026	-0.536041	0.488608	0.0740658	0.407573	-0.285008	0.0915334	0.604452	-0.218487	1	-0.536041	0.77703	0.0557427	172668000	0.12311	0.731421	0.0928392	11	11	11	32.9	32.9	32.9	63.204	0	137.21	3615000000	1717700000	1897300000	5	6	3	3	4	3	2	4	5
Q4V7C7	Q4V7C7;A0A0G2K1C0;F1LY09	Actr3	ENSRNOG00000003206;ENSRNOG00000031855	Actin-related protein 3	-0.465859	-0.962783	0.200991	0.24063	-0.0260898	-0.14222	-0.4227	-0.212159	-0.714321	0.213102	0.200991	0.237452	-0.212159	0.0915798	0.604452	-0.259026	1	-0.714321	0.668431	0.13851	26238200	0.145995	0.351378	0.143919	21	21	21	71.5	71.5	71.5	47.357	0	323.31	69668000000	33285000000	36383000000	9	13	10	12	11	11	12	13	10
B0BNE2	B0BNE2;A0A1W2Q690;A0A1W2Q620	Polr2e	ENSRNOG00000013545	DNA-directed RNA polymerases I, II, and III subunit RPABC1	0.280712	0.441589	-0.00201375	-0.0534562	-0.257664	0.394974	0.13686	0.19102	0.361151	0.139516	-0.0534562	0.313007	0.19102	0.0919316	0.605089	0.240951	1	0.361151	0.719773	-0.104378	12703000	0.136109	0.113757	0.135219	9	9	9	64.8	64.8	64.8	24.57	0	192.59	11246000000	5280100000	5965900000	2	4	2	2	3	4	3	3	3
D3ZTX0	D3ZTX0	Tmed7	ENSRNOG00000003691	Transmembrane emp24 domain-containing protein 7	-0.215202	-1.39848	0.0520051	0.232132	-0.00110555	-0.239554	-0.131182	-0.428748	-0.806841	0.402798	0.0520051	0.313089	-0.239554	0.0919986	0.605089	-0.266495	1	-0.806841	0.719773	0.0943438	40233800	0.150601	0.836704	0.122247	7	7	7	38.1	38.1	38.1	25.479	0	76.75	19093000000	9348000000	9745100000	3	5	5	4	4	5	4	3	4
Q6AYM8	Q6AYM8	Gpaa1	ENSRNOG00000029280		-0.266264	-0.798333	NaN	0.0060466	-0.0588186	-0.39895	NaN	-0.29748	-0.532298	0.295058	-0.026386	0.565216	-0.348215	0.092108	0.605089	-0.348215	1	-0.532298	0.887281	-0.026386	117382000	0.0717505	0.37623	0.0458666	6	6	6	10.1	10.1	10.1	67.964	0	5.6447	465870000	208070000	257790000	0	1	0	0	3	0	1	2	3
Q5RJS9	Q5RJS9;F1MA20	Rpf1	ENSRNOG00000015969	Ribosome production factor 1	-0.0255126	0.570121	-0.556225	-0.770318	-0.613912	0.0721713	0.194091	0.275118	0.272304	0.528469	-0.613912	0.00963567	0.194091	0.0922744	0.605089	0.18046	1	0.272304	0.609869	-0.646819	270895000	0.102158	0.421176	0.110775	12	12	12	47	47	47	39.381	0	116.34	6234000000	3112400000	3121600000	4	5	3	3	4	4	4	6	5
Q62902	Q62902;F1LRA1;A0A0G2JXC1	Lman1	ENSRNOG00000024470	Protein ERGIC-53	-0.172697	-1.00366	-0.221132	0.402849	-0.0509835	-0.188823	-0.14815	-0.410196	-0.588179	0.391521	-0.0509835	0.836756	-0.188823	0.0923152	0.605089	-0.249056	1	-0.588179	1	0.0435778	60880900	0.141026	0.587581	0.322559	12	12	12	37.1	37.1	37.1	57.956	0	323.31	17624000000	8433100000	9191200000	7	7	8	8	7	8	6	4	5
Q3KRF2	Q3KRF2;Q9Z1A6;Q6P513	Hdlbp	ENSRNOG00000031479	Vigilin	-0.274493	-1.74999	-0.0242121	0.372496	0.268675	-0.107824	-0.195565	-0.0601803	-1.01224	0.400951	0.268675	0.225513	-0.107824	0.0924371	0.605089	-0.12119	1	-1.01224	0.667493	0.205653	100209000	0.0686748	1.04334	0.205726	40	40	40	41.7	41.7	41.7	141.69	0	256.19	17402000000	8194700000	9207500000	8	11	6	11	7	8	13	10	8
D3ZS52	D3ZS52	Tmem258b	ENSRNOG00000032740		-0.139539	-1.62935	NaN	NaN	0.0116851	-0.205663	-0.14454	-0.422854	-0.884447	0.445612	0.0116851	1	-0.205663	0.0927063	0.605336	-0.257686	1	-0.884447	1	0.0116851	61233500	0.146269	1.05346	NaN	1	1	1	10.1	10.1	10.1	9.0647	0.0061824	2.4653	208840000	116490000	92348000	0	1	1	1	1	1	1	1	1
D3ZZR9	D3ZZR9	Fkbp2	ENSRNOG00000021153	Peptidyl-prolyl cis-trans isomerase	-0.436339	-0.398307	0.3636	0.695971	-0.222553	-0.116001	-0.414116	-0.257461	-0.417323	0.0289886	0.3636	0.407892	-0.257461	0.0928206	0.605336	-0.262526	1	-0.417323	0.77703	0.279006	229223000	0.149122	0.0268927	0.465068	4	4	4	39.3	39.3	39.3	15.388	0	44.849	7167700000	3956600000	3211100000	3	2	2	2	3	2	3	3	3
G3V674	G3V674	Cldnd1	ENSRNOG00000001657		-0.989259	-2.61026	0.388024	0.448055	NaN	-0.228774	-0.170169	NaN	-1.79976	0.269376	0.41804	0.0456314	-0.199471	0.0928553	0.605336	-0.199471	1	-1.79976	0.609869	0.41804	47176100	0.0414398	1.14622	0.0424484	2	2	2	11.5	11.5	11.5	28.488	0	5.6231	258240000	118220000	140020000	0	2	1	1	2	1	0	0	1
F1MAF5	F1MAF5	Pcid2	ENSRNOG00000025222		0.317264	0.419323	-0.352905	0.195203	0.0721044	0.581372	0.343084	0.168129	0.368294	0.0876499	0.0721044	0.879372	0.343084	0.0932524	0.606757	0.364195	1	0.368294	1	-0.0285326	81242900	0.207429	0.0721667	0.287578	7	7	7	22.6	22.6	22.6	46.105	0	59.405	1417200000	665370000	751800000	2	2	2	1	1	2	0	1	0
D3ZKC8	D3ZKC8	Vangl1	ENSRNOG00000016477		-0.961337	-0.272367	0.43328	NaN	0.193709	-0.700366	-0.18342	-0.482654	-0.616852	0.324238	0.313494	0.232353	-0.482654	0.0933276	0.606757	-0.45548	1	-0.616852	0.668431	0.313494	224011000	0.259542	0.487176	0.169402	7	7	7	16.2	16.2	16.2	60.104	0	73.271	516880000	253250000	263630000	1	1	1	2	1	1	1	1	1
P19945	P19945;D3ZJT4	Rplp0	ENSRNOG00000001148;ENSRNOG00000031358	60S acidic ribosomal protein P0	-0.631655	-1.46524	-0.0632033	0.278736	0.225347	-0.382022	-0.189466	-0.127213	-1.04845	0.240883	0.225347	0.300639	-0.189466	0.0934858	0.606958	-0.2329	1	-1.04845	0.712113	0.14696	137457000	0.132841	0.589437	0.183954	14	14	13	62.1	62.1	62.1	34.215	0	266.79	116730000000	56019000000	60710000000	10	9	9	8	7	9	11	10	7
Q4QQT4	Q4QQT4	Ppp2r1b	ENSRNOG00000010922	Serine/threonine-protein phosphatase 2A 65 kDa regulatory subunit A beta isoform	0.142931	-0.841139	0.474975	0.839115	0.43809	0.455269	0.407596	0.112348	-0.349104	0.607154	0.474975	0.0448057	0.407596	0.0937872	0.608088	0.325071	1	-0.349104	0.609869	0.58406	53876400	0.185759	0.695843	0.221653	18	12	12	38.9	26	26	66.006	0	31.352	1535400000	747080000	788320000	5	6	5	3	4	5	5	7	5
Q9Z311-2	Q9Z311-2;Q9Z311;A0A140TAE6	Mecr		Trans-2-enoyl-CoA reductase, mitochondrial	-0.370425	-0.444181	-0.191646	0.434909	-0.391374	-0.135931	-0.125914	-0.324596	-0.407303	0.0574836	-0.191646	0.861107	-0.135931	0.0941119	0.608979	-0.19548	1	-0.407303	1	-0.0493705	NaN	0.11193	0.052153	0.431124	9	9	9	64.3	64.3	64.3	32.056	0	52.316	1031600000	485260000	546320000	3	3	3	3	2	1	2	4	5
G3V790	G3V790;Q8K1P7	Smarca4	ENSRNOG00000009271	Transcription activator BRG1	0.101985	0.266379	0.0225698	-0.552415	-0.342598	0.116745	0.0599591	0.204402	0.184182	0.267227	-0.342598	0.225568	0.116745	0.0941799	0.608979	0.127035	1	0.184182	0.667493	-0.290815	22702300	0.0727693	0.116245	0.290969	36	36	25	28.9	28.9	22	181.4	0	323.31	24864000000	12122000000	12742000000	21	20	18	20	17	18	17	13	16
Q641Z8	Q641Z8	Pef1	ENSRNOG00000013972	Peflin	-0.951567	NaN	-0.480378	0.000432815	0.414443	-0.282321	-0.157382	-0.518705	-0.951567	1	0.000432815	0.940393	-0.282321	0.0946265	0.611039	-0.31947	1	-0.951567	1	-0.0218341	152039000	0.183503	NaN	0.447825	6	6	6	32.2	32.2	32.2	30.012	0	98.556	1022700000	512420000	510270000	2	3	1	2	2	1	1	1	0
D3ZDD7	D3ZDD7;A0A0G2K3L7;A0A0G2JV89;Q9JKU6	Strbp	ENSRNOG00000010150	Spermatid perinuclear RNA-binding protein	0.808974	0.294047	0.0263618	-0.224699	-0.32157	0.469357	0.527539	0.128159	0.55151	0.278052	-0.224699	0.236565	0.469357	0.0948887	0.611205	0.375019	1	0.55151	0.668431	-0.173302	27069400	0.215757	0.364108	0.17957	21	17	17	40.2	35.1	35.1	73.724	0	60.006	3234500000	1444500000	1790000000	4	4	7	7	6	7	8	6	7
F1MA36	F1MA36;Q9QWN8	Sptbn2	ENSRNOG00000019564	Spectrin beta chain, non-erythrocytic 2	0.133406	-0.389099	0.501663	-0.0432335	-0.196145	0.217383	0.118431	0.0655287	-0.127846	0.710275	-0.0432335	0.719769	0.118431	0.0951333	0.611205	0.133781	1	-0.127846	0.994424	0.0874284	226829000	0.0770822	0.369467	0.366795	77	69	69	46.9	43.4	43.4	271.01	0	323.31	27238000000	12538000000	14700000000	34	45	46	40	36	41	27	35	34
F1M3F2	F1M3F2	Smurf2	ENSRNOG00000014623		NaN	NaN	NaN	NaN	NaN	-3.69945	-2.73082	NaN	NaN	1	NaN	1	-3.21514	0.0951816	0.611205	-3.21514	1	NaN	1	NaN	94763800	0.684921	NaN	NaN	2	2	2	3.3	3.3	3.3	73.701	0.0061776	2.4564	133260000	111720000	21535000	1	0	1	0	0	0	0	1	1
Q5PQQ2	Q5PQQ2;A0A0G2JUA6;A0A0G2JXU2	Wbp11	ENSRNOG00000005505;ENSRNOG00000049593	WW domain-binding protein 11	0.814632	1.22102	0.0823974	0.348226	-0.170251	0.631424	0.399633	1.247	1.01782	0.125442	0.0823974	0.620655	0.631424	0.0952841	0.611205	0.759351	1	1.01782	0.925262	0.0867909	234723000	0.437927	0.287357	0.259267	14	14	14	24.3	24.3	24.3	69.995	0	65.166	5460600000	2271100000	3189500000	5	6	5	4	7	7	7	7	6
Q63396	Q63396	Sub1	ENSRNOG00000050563	Activated RNA polymerase II transcriptional coactivator p15	-0.777817	-2.09857	-0.726195	-0.403808	0.369384	-0.427013	-0.882451	-0.294013	-1.43819	0.274036	-0.403808	0.517065	-0.427013	0.095467	0.611205	-0.534493	1	-1.43819	0.851426	-0.253539	82656100	0.308591	0.933912	0.563036	6	6	6	52	52	52	14.441	0	11.457	4629000000	2303300000	2325700000	0	3	2	3	2	3	1	5	3
D3ZHR2	D3ZHR2	Abcd1	ENSRNOG00000018857		-0.226994	-0.721825	-0.284959	0.0564447	-0.0200624	-0.566067	-0.227076	-0.225579	-0.474409	0.306034	-0.0200624	0.507136	-0.227076	0.0955476	0.611205	-0.339574	1	-0.474409	0.84691	-0.0828588	152823000	0.19615	0.349898	0.179155	4	4	4	7.2	7.2	7.2	81.937	0	34.739	409920000	217040000	192870000	1	2	1	1	1	1	2	1	2
D3ZFQ8	D3ZFQ8	Cyc1	ENSRNOG00000012457		-0.0544206	-0.836669	0.104119	0.20474	0.0668736	-0.341648	-0.0899891	-0.222138	-0.445545	0.45865	0.104119	0.0932206	-0.222138	0.0955489	0.611205	-0.217925	1	-0.445545	0.615282	0.125244	117397000	0.125882	0.553133	0.0713194	12	12	12	49.7	49.7	49.7	35.434	0	323.31	50577000000	22932000000	27645000000	9	9	11	9	9	10	7	8	9
D3ZBY5	D3ZBY5	Ddx10	ENSRNOG00000012500		0.289211	0.591032	-0.457132	-0.707907	-0.641478	0.627298	0.500363	0.150859	0.440121	0.210289	-0.641478	0.0151657	0.500363	0.0959211	0.612765	0.426173	1	0.440121	0.609869	-0.602172	56245000	0.246732	0.21342	0.129926	26	26	26	38.1	38.1	38.1	101.02	0	92.362	6683800000	3273200000	3410500000	6	8	6	3	5	9	7	8	7
Q5BJY9	Q5BJY9	Krt18	ENSRNOG00000047393	Keratin, type I cytoskeletal 18	-0.0570734	-0.6163	1.02021	0.472206	-0.268518	-0.128447	-0.094772	-0.031492	-0.336687	0.441213	0.472206	0.388641	-0.094772	0.0961571	0.613373	-0.0849036	1	-0.336687	0.768384	0.407965	141426000	0.0492249	0.395433	0.64676	29	26	9	74.7	69.3	29.1	47.761	0	323.31	190930000000	88020000000	102910000000	20	21	17	19	18	20	17	15	18
Q07205	Q07205	Eif5	ENSRNOG00000010218	Eukaryotic translation initiation factor 5	-0.362052	-2.31642	-0.105249	0.449958	0.588689	-0.278701	-0.645739	-0.237571	-1.33923	0.401296	0.449958	0.279928	-0.278701	0.0962733	0.613373	-0.387337	1	-1.33923	0.696458	0.311133	144405000	0.224726	1.38194	0.367208	13	13	13	38.7	38.7	38.7	48.954	0	59.004	8322800000	3960700000	4362200000	3	3	4	4	3	4	6	7	4
F1MA52	F1MA52;O88984	Nxf1	ENSRNOG00000019069	Nuclear RNA export factor 1	-0.0548081	-0.213463	0.00471968	-0.331395	-0.336857	0.0292831	0.058187	0.102184	-0.134136	0.34	-0.331395	0.189338	0.058187	0.0964182	0.613477	0.0632181	1	-0.134136	0.650274	-0.221178	231896000	0.03671	0.112186	0.195652	25	25	25	60.7	60.7	60.7	70.484	0	269.59	15726000000	7912800000	7813300000	10	10	12	13	14	13	12	11	13
Q6P9V7	Q6P9V7;Q63797;A0A0G2JVP9	Psme1	ENSRNOG00000019041	Proteasome activator complex subunit 1	0.742687	-1.95538	0.308118	0.672135	0.5902	1.11989	0.285816	0.749234	-0.606344	0.731085	0.5902	0.041607	0.749234	0.0967281	0.613784	0.718314	1	-0.606344	0.609869	0.523484	38146300	0.417896	1.90782	0.190958	16	16	16	69.1	69.1	69.1	28.635	0	174.94	6734700000	3274300000	3460400000	1	2	0	2	1	3	1	0	2
D3ZNU1	D3ZNU1	Cebpz	ENSRNOG00000005087		0.116938	0.593085	-0.265225	-0.602989	-0.591891	0.112483	0.231185	0.399214	0.355012	0.376067	-0.591891	0.0481045	0.231185	0.0967373	0.613784	0.247627	1	0.355012	0.609869	-0.486702	1506910	0.144071	0.336687	0.191885	36	36	36	43.1	43.1	43.1	119.78	0	323.31	31812000000	15455000000	16357000000	21	19	18	19	17	22	15	17	16
A0A0G2JSS9	A0A0G2JSS9	Atl3			-0.110871	-0.661758	0.41244	0.229572	-0.164357	-0.197629	-0.0551062	-0.233726	-0.386314	0.394323	0.229572	0.448256	-0.197629	0.0969213	0.613784	-0.162154	1	-0.386314	0.804165	0.159218	NaN	0.0944462	0.389536	0.294764	22	22	4	60.1	60.1	8	60.249	0	323.31	39984000000	18362000000	21623000000	13	14	11	10	11	12	12	11	11
A0A0G2K2Y3	A0A0G2K2Y3;Q9JJ22-2;Q4KMA8;Q9JJ22	Erap1	ENSRNOG00000009997	Endoplasmic reticulum aminopeptidase 1	-0.231145	-0.692156	0.272874	0.56973	-0.314143	-0.197862	-0.0654173	-0.269367	-0.461651	0.294814	0.272874	0.567535	-0.197862	0.0970307	0.613784	-0.177549	1	-0.461651	0.888991	0.176153	1381110	0.103481	0.325984	0.449804	9	9	9	14	14	14	100.74	0	25.8	1724900000	903770000	821180000	2	1	1	1	2	1	1	3	2
A0A096MJC8	A0A096MJC8	Lcor	ENSRNOG00000042679		1.54643	1.36972	NaN	NaN	0.829687	1.60649	NaN	1.17836	1.45807	0.0385305	0.829687	1	1.39243	0.0971095	0.613784	1.39243	1	1.45807	1	0.829687	268253000	0.30273	0.124954	NaN	2	2	2	5.9	5.9	5.9	59.946	0	33.106	88268000	23396000	64872000	0	1	0	0	1	1	2	0	1
G3V7B7	G3V7B7;O54889	Polr1a	ENSRNOG00000009545	DNA-directed RNA polymerase;DNA-directed RNA polymerase I subunit RPA1	0.56077	0.406853	-0.242562	-0.542351	-0.413685	0.0964592	0.41271	0.350087	0.483812	0.100424	-0.413685	0.0441292	0.350087	0.0975595	0.615812	0.286418	1	0.483812	0.609869	-0.399533	164601000	0.167463	0.108836	0.150395	53	53	52	50	50	49.5	194.09	0	311.76	19079000000	9388200000	9690400000	15	28	13	15	8	11	14	17	23
A0A0G2K101	A0A0G2K101;Q9ESV1;G3V7L9	Luzp1	ENSRNOG00000022402	Leucine zipper protein 1	1.50739	3.41643	-0.145989	-0.911288	-0.505565	1.18231	3.47651	1.6	2.46191	0.235468	-0.505565	0.142546	1.6	0.0978562	0.616163	2.08627	1	2.46191	0.641577	-0.520947	158664000	1.22196	1.3499	0.382882	14	14	14	17.9	17.9	17.9	117.15	0	20.687	1762000000	716150000	1045900000	3	5	2	0	4	3	1	4	2
F7EPZ4	F7EPZ4	Dis3			0.23774	-1.27341	-0.16671	0.273405	0.311189	0.370669	0.269408	0.0894018	-0.517837	0.617501	0.273405	0.459677	0.269408	0.0978997	0.616163	0.243159	1	-0.517837	0.811291	0.139295	NaN	0.142459	1.06855	0.26568	32	32	32	44.8	44.8	44.8	116.78	0	215.29	7697200000	3507800000	4189400000	13	10	9	12	7	12	6	8	6
Q4KLI1	Q4KLI1	Zkscan1	ENSRNOG00000001335	Zinc finger protein with KRAB and SCAN domains 1	0.577408	-1.05209	0.00675056	NaN	-0.330863	0.864352	0.20269	0.800745	-0.237339	0.819544	-0.162056	0.512987	0.800745	0.0980286	0.616163	0.622595	1	-0.237339	0.849608	-0.162056	21289600	0.365037	1.15223	0.238729	8	8	8	20.6	20.6	20.6	63.364	0	10.813	447770000	196500000	251260000	2	1	3	1	2	1	3	0	0
A0A0G2JXF9	A0A0G2JXF9;Q5RKG2	Hcfc2		Host cell factor 2	0.378178	-0.445999	0.218292	-0.315879	-0.412539	1.11723	0.762625	0.277032	-0.0339105	0.947731	-0.315879	0.477407	0.762625	0.0981316	0.616163	0.718962	1	-0.0339105	0.826197	-0.170042	NaN	0.421797	0.582781	0.339762	4	3	3	9.3	8	8	79.018	0.00022568	5.3509	188830000	86893000	101940000	0	1	1	1	2	2	0	1	1
Q505J8	Q505J8	Farsa	ENSRNOG00000003149	Phenylalanine--tRNA ligase alpha subunit	-0.331442	-1.13265	-0.247859	0.160248	0.341651	-0.101663	-0.271109	-0.111207	-0.732047	0.318769	0.160248	0.675139	-0.111207	0.0991085	0.620737	-0.161326	1	-0.732047	0.962705	0.0846799	36944900	0.0951946	0.566541	0.301932	17	17	17	49	49	49	57.719	0	155.38	9332500000	4673400000	4659100000	6	8	6	5	7	10	4	4	4
F1LMK0	F1LMK0;O88884-2;D4A9M6;O88884	Akap1	ENSRNOG00000002373	A-kinase anchor protein 1, mitochondrial	1.53625	NaN	0.0860046	0.307262	-0.0260561	0.998967	1.23551	0.28368	1.53625	1	0.0860046	0.337749	0.998967	0.0992024	0.620737	0.839385	1	1.53625	0.729682	0.122403	73940500	0.495575	NaN	0.169614	5	5	5	16.5	16.5	16.5	57.651	0	84.032	752560000	259420000	493140000	2	3	3	2	2	3	1	1	0
G3V9D3	G3V9D3;F1LQ92;Q80Z70	Sel1l	ENSRNOG00000004464	Protein sel-1 homolog 1	0.1956	-1.03939	-0.263207	-0.0870531	-0.390929	-0.0798048	-0.31668	-0.204978	-0.421895	0.618419	-0.263207	0.107095	-0.204978	0.0993936	0.620737	-0.200487	1	-0.421895	0.631155	-0.247063	124827000	0.118501	0.87327	0.15258	8	8	8	19.2	19.2	19.2	88.522	0	116.03	741250000	341120000	400140000	2	4	3	4	1	3	2	3	2
Q5I0E7	Q5I0E7	Tmed9	ENSRNOG00000021882	Transmembrane emp24 domain-containing protein 9	-0.126958	-0.40022	0.134577	0.290983	0.0254331	-0.292225	-0.145831	-0.0905032	-0.263589	0.304443	0.134577	0.190367	-0.145831	0.0995457	0.620737	-0.176186	1	-0.263589	0.650274	0.150331	11668200	0.104231	0.193225	0.133474	9	9	8	30.6	30.6	30.6	27.028	0	183.15	30952000000	14921000000	16030000000	6	5	6	7	7	6	6	6	5
Q66HC5	Q66HC5	Nup93	ENSRNOG00000018564	Nuclear pore complex protein Nup93	0.313493	-0.16879	-0.00895421	-0.317037	-0.252649	0.432638	0.200929	0.142933	0.0723513	0.814431	-0.252649	0.176118	0.200929	0.0997268	0.620737	0.258833	1	0.0723513	0.645792	-0.19288	11137500	0.153287	0.341025	0.162505	43	43	43	65.1	65.1	65.1	93.301	0	323.31	51498000000	24927000000	26570000000	22	23	18	19	21	23	21	20	24
A0A0G2JYN0	A0A0G2JYN0;Q5U2M6	Dcaf8	ENSRNOG00000006785	DDB1- and CUL4-associated factor 8	NaN	0.836409	0.732834	0.464773	0.441806	-0.187105	NaN	-0.136046	0.836409	1	0.464773	0.0280009	-0.161576	0.0997648	0.620737	-0.161576	1	0.836409	0.609869	0.546471	95053300	0.0361047	NaN	0.161803	6	6	6	14.7	14.7	14.7	64.307	0	13.676	592780000	298950000	293830000	1	1	1	0	0	0	1	0	0
A0A0G2K5A4	A0A0G2K5A4;D3ZLD5	Golga3	ENSRNOG00000037437		0.782307	0.582363	-0.546262	0.684993	0.127947	0.88061	0.447617	0.267052	0.682335	0.0926148	0.127947	0.826111	0.447617	0.0999403	0.620737	0.53176	1	0.682335	1	0.0888925	54248800	0.315314	0.141381	0.616556	22	22	22	24.5	24.5	24.5	162.36	0	96.353	2233700000	1054300000	1179500000	8	8	4	6	6	4	2	3	2
D4A0L4	D4A0L4;Q62764-2;F1MA18;Q62764	Ybx3	ENSRNOG00000005480	Y-box-binding protein 3	-0.280183	-0.405232	0.129772	0.370843	0.310148	0.275631	0.126327	0.47008	-0.342708	0.114884	0.310148	0.0648526	0.275631	0.0999477	0.620737	0.290679	1	-0.342708	0.609869	0.270254	228170000	0.17237	0.0884233	0.125389	12	8	8	59.1	45.4	45.4	31.287	0	323.31	13600000000	6917700000	6682500000	8	8	8	9	8	7	6	5	8
B2RZ72	B2RZ72	Arpc4	ENSRNOG00000008994		-0.180664	-0.604136	0.245803	0.241534	-0.0870872	-0.0808578	-0.277655	-0.147577	-0.3924	0.315011	0.241534	0.349875	-0.147577	0.100031	0.620737	-0.168696	1	-0.3924	0.740388	0.133417	208628000	0.100084	0.29944	0.190974	7	7	7	54.2	54.2	54.2	19.667	0	142.37	40482000000	18714000000	21768000000	5	5	4	5	5	4	6	6	6
Q68FS2	Q68FS2	Cops4	ENSRNOG00000023650	COP9 signalosome complex subunit 4	-0.200887	-1.08302	-0.0343912	0.46953	0.410861	0.35074	0.240126	0.0845129	-0.641955	0.383242	0.410861	0.218322	0.240126	0.100266	0.621337	0.225126	1	-0.641955	0.667493	0.282	10666100	0.133746	0.623765	0.275569	19	19	19	65.5	65.5	65.5	46.289	0	120.07	8162900000	3445400000	4717500000	5	3	6	6	6	7	3	5	7
Q6DGF2	Q6DGF2	Clint1	ENSRNOG00000005406		-0.344723	-1.35356	NaN	-0.223584	0.464391	-0.33763	-0.348031	-0.0801313	-0.849142	0.341242	0.120404	0.785653	-0.33763	0.100388	0.621337	-0.255264	1	-0.849142	1	0.120404	30656500	0.151759	0.713357	0.486472	8	8	2	25.8	25.8	7.2	52.139	0	24.702	1601900000	850480000	751410000	1	2	3	3	4	3	3	3	4
O88321	O88321	Psmd4	ENSRNOG00000021042		0.564416	-0.514543	0.131746	0.23332	0.525749	0.452539	0.589711	0.134671	0.0249368	0.970594	0.23332	0.128419	0.452539	0.100528	0.621397	0.392307	1	0.0249368	0.638884	0.296938	215693000	0.233423	0.762939	0.204561	11	11	11	42.9	42.9	42.9	41.073	0	178.13	15318000000	6784600000	8533200000	5	6	5	6	5	7	4	6	6
Q6AYD3	Q6AYD3;Q6AYD3-2;A0A0G2JVS2	Pa2g4	ENSRNOG00000004904	Proliferation-associated protein 2G4	-0.672169	-2.97423	-0.125699	0.480147	0.491017	-0.464747	-0.746617	-0.189431	-1.8232	0.358503	0.480147	0.300842	-0.464747	0.101007	0.623043	-0.466932	1	-1.8232	0.712113	0.281822	2953210	0.2786	1.6278	0.352965	24	24	24	70.6	70.6	70.6	43.656	0	323.31	86826000000	45272000000	41554000000	13	16	15	14	17	16	13	15	16
O08658	O08658	Nup88	ENSRNOG00000006126	Nuclear pore complex protein Nup88	0.274712	-0.273721	-0.125208	-0.310141	-0.387172	0.449004	0.580999	0.131313	0.000495329	0.99885	-0.310141	0.0718266	0.449004	0.101137	0.623043	0.387106	1	0.000495329	0.609869	-0.274174	57326800	0.231145	0.3878	0.134635	17	17	17	34.8	34.8	34.8	83.584	0	223.34	8095500000	4110500000	3985000000	6	5	7	5	5	6	6	4	2
Q3ZBA0	Q3ZBA0	Tecpr1	ENSRNOG00000001010	Tectonin beta-propeller repeat-containing protein 1	-0.219572	NaN	-0.0872372	NaN	NaN	0.374956	0.518535	NaN	-0.219572	1	-0.0872372	1	0.446746	0.101434	0.623043	0.446746	1	-0.219572	1	-0.0872372	14426400	0.101526	NaN	NaN	1	1	1	1.6	1.6	1.6	130.19	0.00085052	3.9482	33788000	14892000	18896000	1	0	1	0	0	1	0	0	0
F1LPV0	F1LPV0;F1LML0;Q4KLM9	Nars	ENSRNOG00000017852		-0.338339	-1.4119	-0.461664	0.200156	0.584364	-0.0699452	-0.314002	-0.288243	-0.87512	0.350268	0.200156	0.758282	-0.288243	0.101524	0.623043	-0.224063	1	-0.87512	1	0.107619	59196500	0.13409	0.759122	0.529118	21	21	21	50.2	50.2	50.2	64.127	0	323.31	23283000000	11638000000	11645000000	10	8	10	10	9	12	10	10	9
F1LNV5	F1LNV5;Q6P6Q9;A0A0G2K0T5	Micu1	ENSRNOG00000043436	Calcium uptake protein 1, mitochondrial	-0.348528	-0.820735	0.235445	0.493663	0.0205549	-0.319687	-0.455166	-0.106412	-0.584632	0.244348	0.235445	0.209206	-0.319687	0.101544	0.623043	-0.293755	1	-0.584632	0.66568	0.249887	31089800	0.175817	0.3339	0.236884	10	10	10	28.1	28.1	28.1	54.226	0	323.31	5410400000	2556900000	2853500000	2	4	4	5	2	3	2	6	5
Q4KLF8	Q4KLF8;A0A0G2K585;A0A0U1RRQ2	Arpc5	ENSRNOG00000028062	Actin-related protein 2/3 complex subunit 5	-0.598212	-1.11254	0.394827	0.351299	-0.0880626	-0.0832229	-0.346931	-0.232555	-0.855376	0.185924	0.351299	0.290871	-0.232555	0.101577	0.623043	-0.220903	1	-0.855376	0.699616	0.219354	75146100	0.13224	0.363685	0.267119	6	6	6	57.6	57.6	57.6	16.32	0	92.422	11593000000	5992200000	5601300000	2	3	1	3	2	1	5	2	5
G3V9E0	G3V9E0	Mcrs1	ENSRNOG00000029879		NaN	0.143785	NaN	NaN	0.628074	0.117429	0.44997	0.53333	0.143785	1	0.628074	1	0.44997	0.10189	0.624158	0.36691	1	0.143785	1	0.628074	115415000	0.22004	NaN	NaN	5	5	5	16	16	16	51.821	0	5.8272	137680000	43182000	94501000	0	1	1	1	0	0	2	1	0
Q498E0	Q498E0	Txndc12	ENSRNOG00000008090	Thioredoxin domain-containing protein 12	-0.209752	-0.380569	0.488439	0.277183	-0.161003	-0.129173	-0.133435	-0.340688	-0.295161	0.179316	0.277183	0.402501	-0.133435	0.10233	0.625253	-0.201099	1	-0.295161	0.772523	0.20154	132291000	0.120906	0.120786	0.331263	7	7	7	54.1	54.1	54.1	19.018	0	98.979	10653000000	5377300000	5275500000	4	3	3	3	2	3	3	3	3
D4A069	D4A069	Zmym4	ENSRNOG00000012397		0.27741	0.377872	0.213597	0.0202702	-0.295257	0.989176	0.473947	0.308398	0.327641	0.0968473	0.0202702	0.902889	0.473947	0.102335	0.625253	0.590507	1	0.327641	1	-0.0204634	148648000	0.355041	0.0710378	0.256861	30	30	30	30.8	30.8	30.8	172.63	0	184.72	3588600000	1568800000	2019800000	5	9	5	9	2	5	7	7	7
Q5BJY6	Q5BJY6	Amdhd2	ENSRNOG00000006460	Putative N-acetylglucosamine-6-phosphate deacetylase	0.132478	0.15782	NaN	NaN	NaN	0.223052	0.066537	0.296898	0.145149	0.0554337	NaN	1	0.223052	0.102462	0.625253	0.195496	1	0.145149	1	NaN	13344300	0.117627	0.0179194	NaN	6	6	6	34.7	34.7	34.7	43.538	0	12.437	1887500000	852760000	1034700000	0	1	0	1	1	1	1	0	1
Q4KM87	Q4KM87	Actl6a	ENSRNOG00000011553		0.0189794	0.279486	0.107593	-0.396492	-0.215649	0.324754	0.127756	0.122156	0.149233	0.456835	-0.215649	0.372182	0.127756	0.102661	0.625669	0.191555	1	0.149233	0.75609	-0.168183	138764000	0.115388	0.184206	0.255373	17	17	15	53.4	53.4	50.8	47.42	0	323.31	20677000000	9916000000	10761000000	9	10	10	11	11	10	11	9	8
D3ZV81	D3ZV81	Heatr3	ENSRNOG00000015459		0.248656	-1.3827	-0.144058	NaN	3.4573	0.354845	0.891652	0.329985	-0.567023	0.613275	1.65662	0.526511	0.354845	0.103105	0.627572	0.525494	1	-0.567023	0.859566	1.65662	30884400	0.317346	1.15354	2.54655	7	7	7	15.5	15.5	15.5	74.788	0	20.637	3842900000	210190000	3632700000	2	2	1	1	0	2	0	1	1
G3V684	G3V684	Med15	ENSRNOG00000001877		0.0774818	-0.0838138	0.248919	0.0140695	0.146186	-0.352286	-0.145432	-0.12551	-0.003166	0.975021	0.146186	0.18261	-0.145432	0.10327	0.627776	-0.207742	1	-0.003166	0.648512	0.136392	90606500	0.125574	0.114053	0.117731	7	7	7	13.8	13.8	13.8	86.796	0	21.328	515790000	239530000	276260000	1	2	2	1	2	1	1	0	1
P62329	P62329	Tmsb4x	ENSRNOG00000047931	Hematopoietic system regulatory peptide;Thymosin beta-4	-0.659397	NaN	NaN	NaN	NaN	0.57058	0.409907	NaN	-0.659397	1	NaN	1	0.490243	0.103404	0.627792	0.490243	1	-0.659397	1	NaN	28985100	0.113613	NaN	NaN	2	2	2	31.8	31.8	31.8	5.0526	0	6.8538	2044900000	944260000	1100700000	2	2	2	0	2	2	0	0	0
A0A096MJZ2	A0A096MJZ2;M0RCS2	Tbl2	ENSRNOG00000046252		0.0390413	-1.01751	0.230694	0.128674	0.0554621	-0.243568	-0.073177	-0.119448	-0.489234	0.524415	0.128674	0.112667	-0.119448	0.103712	0.628141	-0.145398	1	-0.489234	0.63627	0.138277	26566300	0.0881094	0.747094	0.0880099	11	11	11	34.4	34.4	34.4	49.613	0	64.619	6874100000	3354400000	3519700000	5	4	6	5	6	4	4	4	2
B2GV73	B2GV73	Arpc3	ENSRNOG00000008673	Actin-related protein 2/3 complex subunit 3	-0.340342	-0.871619	0.339454	0.21728	-0.0471159	-0.0834489	-0.355915	-0.236752	-0.605981	0.263009	0.21728	0.274912	-0.236752	0.103733	0.628141	-0.225372	1	-0.605981	0.693012	0.169873	41533300	0.136589	0.37567	0.197597	7	7	7	49.4	49.4	49.4	20.535	0	92.266	19805000000	10313000000	9491600000	4	3	4	5	3	3	5	4	5
A0A0G2K5A0	A0A0G2K5A0;D4AE98	Exosc8	ENSRNOG00000013434		0.497671	0.332272	-0.117886	-0.479208	-0.154164	0.629664	0.846755	0.186951	0.414972	0.12523	-0.154164	0.16107	0.629664	0.103857	0.628141	0.554457	1	0.414972	0.64184	-0.250419	160331000	0.33627	0.116954	0.198965	7	7	7	46.5	46.5	46.5	26.139	0	60.101	4638900000	2199600000	2439300000	2	3	3	2	5	4	5	5	3
F1M0G5	F1M0G5	Ints15	ENSRNOG00000024567		-0.030354	0.0582473	0.0475042	0.300188	0.320151	0.21323	0.206482	0.0465608	0.0139466	0.805834	0.300188	0.126535	0.206482	0.103999	0.628209	0.155424	1	0.0139466	0.638884	0.222614	15340700	0.094339	0.0626506	0.151978	5	5	5	19	19	19	48.439	0	50.282	632770000	263170000	369600000	1	3	1	2	0	3	0	1	0
A0A0H2UHM7	A0A0H2UHM7;Q6AYZ1	Tuba1c	ENSRNOG00000015544	Tubulin alpha-1C chain	-0.831405	-2.27599	-0.145304	0.212038	0.490521	-0.284045	-0.0633042	-0.2907	-1.5537	0.277034	0.212038	0.419039	-0.284045	0.104431	0.630017	-0.212683	1	-1.5537	0.784361	0.185752	218680000	0.129409	1.02148	0.318727	24	4	3	77.2	16.5	13.6	49.806	0	80.447	13559000000	6474100000	7084800000	16	16	15	15	15	16	14	15	15
Q4V888	Q4V888	Tmem55a	ENSRNOG00000006697	Type 2 phosphatidylinositol 4,5-bisphosphate 4-phosphatase	-0.97845	-1.36223	-0.179439	0.0979703	0.0214906	-1.48917	-1.04756	-0.333359	-1.17034	0.103459	0.0214906	0.831548	-1.04756	0.104775	0.631051	-0.956699	1	-1.17034	1	-0.0199927	33079500	0.583241	0.271371	0.143282	7	7	6	46.7	46.7	42.8	28.024	0	40.103	1327700000	731540000	596120000	1	2	1	2	2	1	5	3	1
Q66H44	Q66H44;F1LRC8	Tmem39b	ENSRNOG00000023746	Transmembrane protein 39B	0.567935	NaN	-0.948336	NaN	-0.207589	0.646439	0.462157	NaN	0.567935	1	-0.577962	0.362809	0.554298	0.104867	0.631051	0.554298	1	0.567935	0.747663	-0.577962	151618000	0.130307	NaN	0.523787	3	3	3	12.8	12.8	12.8	56.374	0	51.124	159200000	71076000	88124000	1	0	0	2	0	1	0	0	0
Q4KM92	Q4KM92	Pus1	ENSRNOG00000037500	tRNA pseudouridine synthase A, mitochondrial	-0.196464	-1.58024	-0.0871497	0.517326	0.512114	-0.235892	-0.171443	-0.0515992	-0.888354	0.421256	0.512114	0.257935	-0.171443	0.105275	0.632712	-0.152978	1	-0.888354	0.679315	0.314097	53675500	0.0935235	0.978481	0.347499	15	15	15	43.7	43.7	43.7	47.515	0	66.809	5050100000	2462400000	2587700000	5	4	4	5	5	3	1	3	3
A0A0G2JXY9	A0A0G2JXY9;F1LQ45;Q9Z1Z3;Q505I9	Epn2	ENSRNOG00000002523	Epsin-2	0.659075	0.174081	0.181505	0.216435	0.382767	0.155853	0.514393	0.244763	0.416578	0.335605	0.216435	0.0524844	0.244763	0.105507	0.633309	0.305003	1	0.416578	0.609869	0.260236	47568000	0.186707	0.342943	0.107543	7	6	6	18.9	17.7	17.7	64.659	0	40.332	273700000	114150000	159550000	2	2	2	2	2	2	2	1	1
Q6IN37	Q6IN37	Gm2a	ENSRNOG00000011864		-0.269705	-1.27407	0.39517	0.318923	0.0938598	-0.128388	-0.572082	-0.608473	-0.771889	0.367197	0.318923	0.0967054	-0.572082	0.105643	0.633329	-0.436314	1	-0.771889	0.6207	0.269318	40277000	0.267292	0.710196	0.15666	5	5	5	28.6	28.6	28.6	21.493	0	75.81	25090000000	11551000000	13539000000	3	2	2	4	3	3	2	2	2
A0JPN0	A0JPN0	Rad18	ENSRNOG00000005907		0.453028	0.592085	-0.139562	-0.573933	-0.682193	0.502785	0.111609	0.52823	0.522556	0.0842104	-0.573933	0.107013	0.502785	0.105804	0.633494	0.380875	1	0.522556	0.631155	-0.465229	207837000	0.233538	0.098328	0.287183	9	9	9	23.9	23.9	23.9	56.008	0	37.729	868580000	408120000	460460000	3	5	2	3	2	3	6	2	2
A0A096MKE9	A0A096MKE9;Q5U2M4	Lig3	ENSRNOG00000021815	DNA ligase	0.165347	-0.465367	-0.0322142	-0.5082	0.141543	0.25547	0.214988	0.0530292	-0.15001	0.717338	-0.0322142	0.564282	0.214988	0.106019	0.633711	0.174496	1	-0.15001	0.886357	-0.132957	69765500	0.107123	0.445982	0.336383	14	14	14	18.6	18.6	18.6	112.02	0	36.25	2674700000	1237000000	1437700000	2	6	4	4	5	4	2	3	1
D4AEG2	D4AEG2;Q66HQ8;Q63481;Q63483	Rab29	ENSRNOG00000014258;ENSRNOG00000016769;ENSRNOG00000049641	Ras-related protein Rab-7L1	-0.711512	-1.11607	-0.335262	-0.741324	0.122448	-0.557837	-0.495682	-0.115668	-0.913792	0.138688	-0.335262	0.330469	-0.495682	0.106105	0.633711	-0.389729	1	-0.913792	0.72296	-0.318046	53717900	0.23937	0.286067	0.432143	6	6	6	34.5	34.5	34.5	25.26	0	8.7113	592380000	320770000	271610000	1	2	2	2	0	3	2	2	1
G3V7I3	G3V7I3	Atp13a1	ENSRNOG00000010776		-0.146518	-0.615783	0.0223523	-0.319063	-0.14177	-0.311422	-0.08224	-0.170281	-0.381151	0.351289	-0.14177	0.276398	-0.170281	0.106346	0.634348	-0.187981	1	-0.381151	0.69456	-0.14616	21278100	0.115612	0.33182	0.17075	26	26	26	32.5	32.5	32.5	131.91	0	108.47	9847500000	4586700000	5260800000	12	15	9	9	11	8	7	10	10
A0A0G2KAY8	A0A0G2KAY8;Q923V8	Selenof		15 kDa selenoprotein	0.175035	-0.395132	0.0222476	0.156012	0.298282	0.256862	0.1694	0.0584441	-0.110048	0.76547	0.156012	0.18444	0.1694	0.106478	0.634348	0.161569	1	-0.110048	0.648763	0.158847	NaN	0.0994403	0.403168	0.138039	5	5	5	49.1	49.1	49.1	17.672	0	37.341	2724800000	1242300000	1482600000	4	3	3	1	2	3	2	3	2
F1LY19	F1LY19;A0A0U1RS25	Upf1	ENSRNOG00000020134		-0.2337	-1.38419	-0.00644733	0.372798	0.1823	-0.0492801	-0.152161	-0.0665944	-0.808946	0.39352	0.1823	0.236777	-0.0665944	0.106791	0.635421	-0.0893452	1	-0.808946	0.668431	0.182884	20677700	0.0550847	0.81352	0.189623	45	45	45	52.2	52.2	52.2	122.64	0	294.01	17853000000	8540500000	9312300000	18	10	17	17	15	16	14	15	12
Q6T5E8	Q6T5E8;Q6T5E7	Ugt1a1	ENSRNOG00000018740		-0.157897	-1.00835	0.396507	-0.0803488	-0.227928	-0.0529476	-0.137918	-0.223739	-0.583125	0.401116	-0.0803488	0.890299	-0.137918	0.107193	0.636395	-0.138201	1	-0.583125	1	0.0294103	94910400	0.0853958	0.601364	0.326366	22	22	1	62.9	62.9	5.1	59.571	0	323.31	140830000000	65591000000	75242000000	18	17	17	18	14	15	12	13	11
P0DMW1	P0DMW1;P0DMW0	Hspa1a		Heat shock 70 kDa protein 1A;Heat shock 70 kDa protein 1B	NaN	0.11063	-2.77764	-1.85243	0.799502	-0.718047	-1.01226	NaN	0.11063	1	-1.85243	0.355801	-0.865152	0.107222	0.636395	-0.865152	1	0.11063	0.742885	-1.27686	NaN	0.208038	NaN	1.85673	10	6	5	25.6	17	15.4	70.184	0	23.045	585390000	300800000	284590000	4	3	4	3	3	4	4	3	3
Q4KLI7	Q4KLI7;A0A0G2K2X3;Q6TUF1	Sf3a3	ENSRNOG00000007629		0.139283	0.358141	0.0292044	-0.330922	-0.170323	0.52615	0.179317	0.216835	0.248712	0.263875	-0.170323	0.269987	0.216835	0.10755	0.637368	0.307434	1	0.248712	0.688627	-0.157347	146474000	0.19034	0.154756	0.180413	26	26	26	63.1	63.1	63.1	58.841	0	323.31	60020000000	27621000000	32399000000	13	15	14	13	14	15	15	13	13
Q6AYI5	Q6AYI5	Shoc2	ENSRNOG00000015339	Leucine-rich repeat protein SHOC-2	0.175464	NaN	0.355806	0.288536	0.139993	0.0624037	0.276958	0.307545	0.175464	1	0.288536	0.0546383	0.276958	0.107653	0.637368	0.215636	1	0.175464	0.609869	0.261445	282113000	0.133581	NaN	0.110427	6	6	6	16.7	16.7	16.7	64.92	0	9.3139	854340000	363560000	490780000	1	1	1	1	3	1	2	1	0
Q5M882	Q5M882	Pop4	ENSRNOG00000027646	Ribonuclease P protein subunit p29	-0.33856	NaN	0.0317118	-0.337178	-0.226901	0.327088	0.46213	NaN	-0.33856	1	-0.226901	0.246014	0.394609	0.107887	0.637962	0.394609	1	-0.33856	0.67008	-0.177456	95761000	0.0954895	NaN	0.18935	7	7	7	39.4	39.4	39.4	25.633	0	13.351	977190000	447790000	529400000	4	3	2	3	2	0	0	0	0
F1LN91	F1LN91;M0R671;F1LN42	Tns3	ENSRNOG00000010588;ENSRNOG00000014182;ENSRNOG00000025695		0.127511	0.482022	-0.474913	-0.89961	-0.640794	0.869871	1.23094	NaN	0.304766	0.335364	-0.640794	0.0322124	1.05041	0.108358	0.639956	1.05041	1	0.304766	0.609869	-0.671772	88471100	0.255315	0.250677	0.214037	5	5	5	6.3	6.3	6.3	164.79	0	12.918	599820000	298050000	301760000	0	1	0	1	1	2	0	0	1
Q5D023	Q5D023;Q62698;A0A096MIY2;A0A096MKA1;A0A096MIX4	Dync1li2	ENSRNOG00000025791	Cytoplasmic dynein 1 light intermediate chain 2	0.802697	0.0600201	-0.223834	0.495453	0.370532	0.844546	0.173	0.642129	0.431359	0.452486	0.370532	0.436495	0.642129	0.108597	0.640259	0.553225	1	0.431359	0.794717	0.21405	739197	0.344488	0.525152	0.384329	12	11	11	41.1	38.4	38.4	54.114	0	40.523	1076500000	501470000	575080000	1	2	3	0	2	2	1	3	1
D3ZFT1	D3ZFT1;A0A0G2JVK8	Rfc1	ENSRNOG00000002855		0.510813	-0.455712	0.531817	0.165086	-0.0255955	0.359799	1.09148	0.458777	0.0275501	0.963747	0.165086	0.304714	0.458777	0.108828	0.640259	0.636684	1	0.0275501	0.716302	0.223769	44397900	0.396958	0.683436	0.283302	14	14	14	18.1	18.1	18.1	125.78	0	39.189	1594800000	708180000	886570000	3	7	4	5	2	5	3	5	1
G3V6A8	G3V6A8;A0A0G2JWG6	Golgb1	ENSRNOG00000030314		0.336972	-0.467452	0.0130897	0.136637	0.0189591	0.543939	0.49932	0.108493	-0.0652402	0.89763	0.0189591	0.29715	0.49932	0.108983	0.640259	0.383917	1	-0.0652402	0.70817	0.0562285	69853300	0.239566	0.568814	0.0696973	58	58	58	24.6	24.6	24.6	364.25	0	239.5	8418400000	3825100000	4593300000	18	20	13	13	14	17	11	13	11
F1LT09	F1LT09	Wdr33	ENSRNOG00000011382		0.294842	1.13736	NaN	0.0467006	-0.335008	0.439335	0.432318	1.17313	0.716099	0.338521	-0.144154	0.588177	0.439335	0.109147	0.640259	0.681593	1	0.716099	0.906033	-0.144154	24302100	0.425695	0.595747	0.269909	13	13	13	18.4	18.4	18.4	145.41	0	19.82	829250000	374210000	455050000	2	2	4	0	4	3	1	2	2
Q6PDV7	Q6PDV7;D4A1P2	Rpl10	ENSRNOG00000027149;ENSRNOG00000032720	60S ribosomal protein L10	-0.654385	-1.97551	-0.178669	0.352011	0.417092	-0.414484	-0.265659	-0.0925586	-1.31495	0.296363	0.352011	0.406412	-0.265659	0.109432	0.640259	-0.257567	1	-1.31495	0.775759	0.196811	124947000	0.161115	0.934179	0.3268	11	11	11	43	43	43	24.604	0	278.45	32740000000	16054000000	16686000000	5	6	7	7	4	5	5	6	6
Q09326	Q09326	Mgat2	ENSRNOG00000004234	Alpha-1,6-mannosyl-glycoprotein 2-beta-N-acetylglucosaminyltransferase	-0.276527	-0.079838	NaN	0.633497	-0.162859	-0.737822	-0.348188	-0.215262	-0.178183	0.321063	0.235319	0.660193	-0.348188	0.109608	0.640259	-0.433757	1	-0.178183	0.954861	0.235319	100936000	0.271586	0.13908	0.563109	6	6	6	19.5	19.5	19.5	51.109	0	9.1247	1225300000	595970000	629350000	1	3	2	2	2	2	2	0	4
D4A1A5	D4A1A5;A0A0G2JZD1;Q80W83	Ppp2r5c	ENSRNOG00000004973;ENSRNOG00000021025;ENSRNOG00000048905		0.963326	NaN	NaN	NaN	0.783289	0.952781	0.670478	NaN	0.963326	1	0.783289	1	0.811629	0.109619	0.640259	0.811629	1	0.963326	1	0.783289	228534000	0.199618	NaN	NaN	9	4	4	23.9	10.1	10.1	60.872	0	7.3432	215910000	92462000	123450000	2	5	2	1	3	0	1	0	0
Q5RK17	Q5RK17;D4A7Z5	Diablo	ENSRNOG00000008548;ENSRNOG00000029197		0.451873	-0.360224	0.299884	0.976657	0.253323	0.0892687	0.347183	0.187286	0.0458245	0.928457	0.299884	0.160869	0.187286	0.109621	0.640259	0.207913	1	0.0458245	0.64184	0.509955	95849700	0.130189	0.574239	0.404846	6	6	6	43	43	43	26.906	0	126.62	5371100000	2624000000	2747100000	5	3	3	4	3	3	4	3	3
D4ACC2	D4ACC2;D3ZD05;Q3B7V4	Kank2	ENSRNOG00000010643		1.09174	1.88647	0.743994	0.722357	0.147689	0.50518	0.567236	1.44583	1.48911	0.166012	0.722357	0.110342	0.567236	0.109786	0.640259	0.839416	1	1.48911	0.631155	0.538014	22848300	0.526088	0.561958	0.338204	7	7	6	10	10	8	90.221	0	56.677	1095200000	424750000	670500000	0	1	2	1	3	3	1	0	0
D4ACD5	D4ACD5	Plek2	ENSRNOG00000010098		0.400319	NaN	NaN	-0.108674	0.260205	0.0553688	0.0787465	NaN	0.400319	1	0.0757652	0.751864	0.0670576	0.109865	0.640259	0.0670576	1	0.400319	1	0.0757652	111451000	0.0165305	NaN	0.260837	4	4	4	19.5	19.5	19.5	40.037	0	32.426	371400000	172910000	198500000	1	2	1	0	0	1	0	0	0
P54313	P54313	Gnb2	ENSRNOG00000001409	Guanine nucleotide-binding protein G(I)/G(S)/G(T) subunit beta-2	-0.123154	-0.552065	0.207554	-0.162816	-0.340804	-0.0450225	-0.138748	-0.0585593	-0.33761	0.360272	-0.162816	0.603374	-0.0585593	0.109909	0.640259	-0.0807765	1	-0.33761	0.91481	-0.0986887	24245800	0.0506588	0.303286	0.279747	16	16	7	66.5	66.5	40.3	37.331	0	323.31	107640000000	52685000000	54956000000	14	15	13	12	12	12	12	13	11
Q811A2	Q811A2;A0A0G2K6A4;A0A0G2JU36	Bst2	ENSRNOG00000023370	Bone marrow stromal antigen 2	0.23217	-0.150145	NaN	NaN	0.363339	-0.352011	-0.247337	NaN	0.0410124	0.865454	0.363339	1	-0.299674	0.110073	0.640259	-0.299674	1	0.0410124	1	0.363339	19800300	0.0740155	0.270337	NaN	2	2	2	14	14	14	19.674	0	33.055	4573500000	2360300000	2213200000	1	1	0	1	0	1	0	1	0
Q641W4	Q641W4	Rfc2	ENSRNOG00000001457	Replication factor C subunit 2	0.0675573	0.458387	0.281772	0.183709	0.137082	0.408484	0.147558	0.154392	0.262972	0.406845	0.183709	0.0422324	0.154392	0.110153	0.640259	0.236811	1	0.262972	0.609869	0.200854	27130800	0.148712	0.276358	0.0738532	13	13	13	48.7	48.7	48.7	38.656	0	108.62	3940800000	1868800000	2072000000	4	2	4	3	4	2	3	6	4
G3V7V3	G3V7V3	Slc27a4	ENSRNOG00000014369		-0.341593	-1.06396	-0.456973	-0.218656	-0.193194	-0.424943	-0.11016	-0.224424	-0.702778	0.302226	-0.218656	0.0748175	-0.224424	0.110574	0.640991	-0.253176	1	-0.702778	0.609869	-0.289607	13707100	0.159349	0.510792	0.145501	13	13	13	28.9	28.9	28.9	72.188	0	46.723	1939100000	992460000	946690000	6	4	5	6	3	6	4	5	5
Q5RKG6	Q5RKG6;G3V769	Trim35	ENSRNOG00000009449	Tripartite motif-containing protein 35	0.0251707	0.044464	-0.586752	0.023624	0.0358929	-0.493715	-0.629166	-0.123811	0.0348173	0.172069	0.023624	0.482599	-0.493715	0.110594	0.640991	-0.415564	1	0.0348173	0.829298	-0.175745	48617500	0.261585	0.0136424	0.355996	6	6	6	13	13	13	57.304	0	19.285	1398200000	723100000	675050000	1	1	0	1	0	2	0	1	0
D3ZJU5	D3ZJU5;A0A0G2K9D6	Smarcc1	ENSRNOG00000020804		0.324587	0.463569	0.0779657	-0.66911	-0.2145	0.918921	0.458878	0.250661	0.394078	0.111118	-0.2145	0.342061	0.458878	0.110734	0.640991	0.54282	1	0.394078	0.732307	-0.268548	117562000	0.341946	0.0982752	0.376459	26	18	18	34.2	27.3	27.3	120.5	0	182.03	6889000000	3231900000	3657100000	12	14	10	12	11	11	11	9	13
P02401	P02401;D3ZN03	Rplp2	ENSRNOG00000002116;ENSRNOG00000031052;ENSRNOG00000037607	60S acidic ribosomal protein P2	-0.617557	-1.24103	-0.135271	0.192643	0.24565	-0.388998	-0.265717	-0.0815201	-0.929295	0.206049	0.192643	0.485784	-0.265717	0.11091	0.640991	-0.245412	1	-0.929295	0.831883	0.101007	220909000	0.154742	0.440865	0.206332	8	8	1	86.1	86.1	14.8	11.692	0	323.31	86569000000	40687000000	45883000000	6	6	6	5	6	6	5	5	6
Q4KM91	Q4KM91	Cdca7	ENSRNOG00000001514	Cell division cycle-associated protein 7	1.88397	0.264247	0.218471	0.325041	-0.682233	1.98648	2.00802	0.397965	1.07411	0.411286	0.218471	0.898188	1.98648	0.110951	0.640991	1.46415	1	1.07411	1	-0.0462404	65630800	0.923409	1.14532	0.553357	5	5	4	19.4	19.4	17	43.024	0	33.461	727080000	314800000	412280000	1	1	1	0	0	1	3	3	3
P16970	P16970	Abcd3		ATP-binding cassette sub-family D member 3	-0.192054	-0.989012	0.0273508	0.151956	-0.00222777	-0.372365	-0.0714686	-0.32519	-0.590533	0.377896	0.0273508	0.337905	-0.32519	0.11114	0.641306	-0.256341	1	-0.590533	0.729682	0.0590262	NaN	0.161832	0.563535	0.0818268	15	15	15	33.4	33.4	33.4	75.315	0	145.92	14158000000	6152200000	8005600000	7	7	6	6	6	6	6	7	5
Q3MIE4	Q3MIE4	Vat1	ENSRNOG00000020684	Synaptic vesicle membrane protein VAT-1 homolog	-1.12276	-1.94442	-0.00512658	0.463427	0.091615	-0.329886	-1.13156	-0.522533	-1.53359	0.166631	0.091615	0.327947	-0.522533	0.111571	0.643018	-0.661327	1	-1.53359	0.72296	0.183305	89164900	0.418471	0.581005	0.247368	19	19	19	67.3	67.3	67.3	43.118	0	164.35	31474000000	16528000000	14946000000	6	8	12	9	9	8	10	11	9
Q63083	Q63083	Nucb1	ENSRNOG00000020889	Nucleobindin-1	0.255581	1.02211	0.190487	0.537339	-0.0421784	0.204513	0.427508	0.805787	0.638847	0.344011	0.190487	0.30753	0.427508	0.111998	0.644697	0.479269	1	0.638847	0.717621	0.228549	102559000	0.303961	0.54202	0.291628	21	21	21	55.6	55.6	55.6	53.506	0	210.29	19887000000	9124900000	10763000000	8	9	9	8	11	8	7	8	9
D3Z8C7	D3Z8C7;A0A0G2KAW5	Wdr48	ENSRNOG00000016942		NaN	0.515914	0.18092	0.271012	0.143711	-0.265015	-1.02689	-0.531531	0.515914	1	0.18092	0.0343708	-0.531531	0.112553	0.645562	-0.607813	1	0.515914	0.609869	0.198547	127779000	0.386624	NaN	0.0654553	6	6	6	10.4	10.4	10.4	76.079	0	43.985	1114400000	475530000	638880000	0	2	1	1	1	0	1	1	0
Q4V7D1	Q4V7D1;A0A0G2K075;A0A0G2JX79;A0A0G2JXS8;Q7TPJ0	Ssr1	ENSRNOG00000014165	Translocon-associated protein subunit alpha	-0.135132	-0.0937882	-0.0470162	0.121829	-0.191635	-0.187522	-0.0669419	-0.0698817	-0.11446	0.11375	-0.0470162	0.709151	-0.0698817	0.112588	0.645562	-0.108115	1	-0.11446	0.985843	-0.0389408	29410600	0.0687839	0.0292345	0.156888	5	5	5	26.8	26.8	26.8	32.207	0	96.952	20356000000	9909100000	10447000000	3	3	5	2	3	3	4	4	3
Q5FVK9	Q5FVK9	Rab5if	ENSRNOG00000020317		0.304326	NaN	NaN	NaN	NaN	0.20319	0.141433	NaN	0.304326	1	NaN	1	0.172311	0.112885	0.645562	0.172311	1	0.304326	1	NaN	158753000	0.0436686	NaN	NaN	1	1	1	12.4	12.4	12.4	14.825	0.0030569	3.1629	235790000	100780000	135010000	1	1	0	1	1	1	0	0	0
D4A031	D4A031	Ddx42	ENSRNOG00000009474		0.332277	-0.11279	0.104924	0.328354	0.294761	0.739573	0.315	0.228971	0.109744	0.708328	0.294761	0.0732406	0.315	0.113397	0.645562	0.427848	1	0.109744	0.609869	0.24268	94158900	0.273367	0.31471	0.120476	33	33	33	55.8	55.8	55.8	102.07	0	323.31	18465000000	7974100000	10491000000	14	15	16	17	20	18	13	14	15
Q5PQJ6	Q5PQJ6	Pycrl	ENSRNOG00000008708	Pyrroline-5-carboxylate reductase 3	-0.271078	-1.84239	0.533862	1.20188	0.816526	0.26687	0.0521701	0.277316	-1.05673	0.406999	0.816526	0.0480794	0.26687	0.1135	0.645562	0.198785	1	-1.05673	0.609869	0.850755	116842000	0.12708	1.11108	0.33532	5	5	5	27.7	27.7	27.7	28.878	0	23.548	2921500000	1344700000	1576900000	2	2	2	2	3	3	1	2	1
D3ZJF7	D3ZJF7	Terf2	ENSRNOG00000020435		0.210553	0.286067	-0.0548268	-0.16622	-0.434079	0.226659	0.0420735	0.207216	0.24831	0.0960649	-0.16622	0.191867	0.207216	0.113505	0.645562	0.158649	1	0.24831	0.650736	-0.218375	50136800	0.101425	0.0533959	0.194931	10	10	10	26	26	26	56.127	0	63.404	3965100000	1859500000	2105600000	5	7	4	5	4	5	5	5	3
Q68FX7	Q68FX7	Thoc5	ENSRNOG00000008456	THO complex subunit 5 homolog	0.173268	0.163056	0.0948887	-0.32258	-0.411226	0.234656	0.246271	0.0461173	0.168162	0.0193247	-0.32258	0.305568	0.234656	0.113578	0.645562	0.175681	1	0.168162	0.716546	-0.212972	85820100	0.112356	0.00722118	0.270275	18	18	18	38.6	38.6	38.6	78.659	0	158.63	9508500000	4632000000	4876500000	9	7	9	8	9	8	5	8	8
F1M1F1	F1M1F1	Marchf6	ENSRNOG00000011066		NaN	NaN	NaN	NaN	-1.68339	-0.736293	NaN	-1.06055	NaN	1	-1.68339	1	-0.89842	0.11366	0.645562	-0.89842	1	NaN	1	-1.68339	104210000	0.229283	NaN	NaN	3	3	3	3.3	3.3	3.3	102.31	0.0043197	2.6397	127180000	74906000	52270000	1	0	0	0	0	0	1	0	0
A0A0G2K5K8	A0A0G2K5K8;F1LMR4;Q52KK4	Naf1	ENSRNOG00000026403	H/ACA ribonucleoprotein complex non-core subunit NAF1	NaN	NaN	NaN	1.1254	0.562694	0.43808	0.44297	1.21586	NaN	1	0.844046	0.204835	0.44297	0.113844	0.645562	0.698972	1	NaN	0.660026	0.844046	24466700	0.447649	NaN	0.397891	3	3	3	9.8	9.8	9.8	44.637	0	17.323	327510000	129870000	197640000	1	0	0	1	0	0	1	0	0
F1M2K6	F1M2K6;F1M787	Pkp4	ENSRNOG00000005504;ENSRNOG00000010649	Plakophilin 4	-0.204998	0.239186	0.317351	-0.111958	-0.561466	0.0848807	0.0423803	0.0223323	0.0170942	0.951096	-0.111958	0.685944	0.0423803	0.113865	0.645562	0.0498644	1	0.0170942	0.970737	-0.118691	76731900	0.0319388	0.314086	0.439447	8	8	8	9.4	9.4	9.4	131.46	0	26.291	1599100000	747870000	851190000	0	1	1	1	2	0	1	0	2
Q4V882	Q4V882	Epn3	ENSRNOG00000003284	Epsin-3	0.523027	-0.531723	0.406061	0.158326	-0.0258972	0.370232	0.138331	0.129843	-0.00434801	0.994751	0.158326	0.28792	0.138331	0.114008	0.645562	0.212802	1	-0.00434801	0.697885	0.179497	82040600	0.136405	0.745821	0.216756	10	10	8	29.4	29.4	26.3	65.047	0	32.541	2479500000	1111600000	1367900000	3	3	5	1	3	4	2	3	2
D3ZTF1	D3ZTF1	Slc4a1ap	ENSRNOG00000004901		0.00852259	NaN	-0.145988	0.447839	0.574629	0.272438	0.341208	0.842668	0.00852259	1	0.447839	0.318942	0.341208	0.114077	0.645562	0.485438	1	0.00852259	0.720403	0.29216	36035100	0.311275	NaN	0.384706	7	7	7	17.7	17.7	17.7	79.023	0	11.933	939070000	407570000	531510000	2	1	1	1	1	2	2	1	0
Q5XI29	Q5XI29	Cpsf7	ENSRNOG00000020668	Cleavage and polyadenylation specificity factor subunit 7	-0.0373191	0.226997	0.270072	0.0960853	0.229194	0.134252	0.459212	0.205324	0.0948391	0.603735	0.229194	0.0634587	0.205324	0.114191	0.645562	0.266262	1	0.0948391	0.609869	0.19845	233519000	0.170836	0.1869	0.0909766	10	10	10	27.5	27.5	27.5	51.072	0	71.173	7716400000	3495700000	4220700000	4	5	5	5	4	5	6	4	5
D3ZZY2	D3ZZY2	Utp14a	ENSRNOG00000005012		0.759542	1.59483	-0.133701	-0.278313	-0.500263	0.581789	0.560335	1.57942	1.17718	0.217041	-0.278313	0.104056	0.581789	0.114263	0.645562	0.907182	1	1.17718	0.631155	-0.304092	135163000	0.582277	0.590636	0.184636	29	29	29	45.5	45.5	45.5	91.043	0	235.01	12398000000	5505100000	6893400000	8	11	5	10	11	13	9	9	10
E9PTF0	E9PTF0	Ddx49	ENSRNOG00000022368		0.10477	-0.0958592	-0.408524	-0.488993	-0.450953	0.257655	0.0590682	0.319795	0.00445535	0.971744	-0.450953	0.00266275	0.257655	0.114264	0.645562	0.212173	1	0.00445535	0.609869	-0.44949	20725400	0.136184	0.141866	0.0402545	12	12	12	35	35	35	54.245	0	99.711	5091200000	2471100000	2620100000	9	9	4	6	9	7	4	7	9
D3ZQW8	D3ZQW8	Gltscr1	ENSRNOG00000011262		-0.0589538	1.44969	NaN	NaN	-0.208961	0.784355	0.5431	NaN	0.69537	0.525875	-0.208961	1	0.663727	0.114452	0.645562	0.663727	1	0.69537	1	-0.208961	79133700	0.170593	1.06677	NaN	4	4	4	3.9	3.9	3.9	160.95	0.0068886	2.3547	226710000	112090000	114620000	1	1	1	0	1	0	0	0	0
M0R5F5	M0R5F5	Cdca5	ENSRNOG00000046635		NaN	NaN	0.174023	0.139202	-0.270429	1.68311	1.1275	0.339707	NaN	1	0.139202	0.929488	1.1275	0.114554	0.645562	1.05011	1	NaN	1	0.0142655	228384000	0.675038	NaN	0.247166	4	4	4	11	11	11	50.813	0	8.3439	1304700000	579060000	725660000	1	0	0	1	0	0	1	3	0
D3ZV88	D3ZV88	Zfp444	ENSRNOG00000015517		-0.063438	0.530171	-0.391323	-0.158285	-0.842845	-0.064672	-0.0934417	NaN	0.233366	0.575815	-0.391323	0.14715	-0.0790568	0.114583	0.645562	-0.0790568	1	0.233366	0.641577	-0.464151	72775800	0.0203433	0.419745	0.348043	5	5	5	23.4	23.4	23.4	36.134	0	33.099	759790000	369590000	390200000	2	2	2	2	3	2	0	0	0
A0A0G2JUU7	A0A0G2JUU7;D3ZMR7	Tubgcp3	ENSRNOG00000017085		-6.00802	-6.43821	-7.94258	NaN	-0.594204	-6.48927	-4.48601	NaN	-6.22312	0.0219953	-4.26839	0.452462	-5.48764	0.114934	0.646772	-5.48764	1	-6.22312	0.806253	-4.26839	81670500	1.41652	0.304191	5.19609	5	5	5	5.1	5.1	5.1	103.09	0.00022462	5.1953	2746400000	2532000000	214390000	1	1	1	1	1	1	0	0	1
A0JN30	A0JN30	Cnpy2	ENSRNOG00000003549		-0.228636	-0.806783	0.159266	0.281938	-0.583839	-0.130569	-0.641798	-0.420007	-0.517709	0.324197	0.159266	0.876652	-0.420007	0.1152	0.647073	-0.397458	1	-0.517709	1	-0.047545	2716180	0.25636	0.408812	0.468477	10	10	10	64.8	64.8	64.8	20.709	0	103.3	11714000000	5597400000	6116700000	3	7	6	3	4	6	6	5	6
F1LMW7	F1LMW7;P30009	Marcks	ENSRNOG00000000579	Myristoylated alanine-rich C-kinase substrate	1.21807	1.84155	0.316788	0.470505	0.205491	0.618966	0.858417	2.02896	1.52981	0.127977	0.316788	0.0498992	0.858417	0.115361	0.647073	1.16878	1	1.52981	0.609869	0.330928	44693600	0.754495	0.440869	0.133072	8	8	8	48.5	48.5	48.5	29.959	0	323.31	5514500000	2122000000	3392500000	4	3	4	2	3	2	5	4	4
B4F781	B4F781;M0R746;M0RC11	Fam60a	ENSRNOG00000046048;ENSRNOG00000049943		-0.329739	0.399445	0.00652472	NaN	-0.0684438	-0.105089	-0.0556812	-0.212969	0.0348526	0.939328	-0.0309595	0.560506	-0.105089	0.115394	0.647073	-0.12458	1	0.0348526	0.883334	-0.0309595	132927000	0.0804348	0.515611	0.0530108	5	5	5	25.3	25.3	25.3	24.816	0	15.383	710440000	362510000	347930000	3	2	1	0	2	2	0	1	1
P04897	P04897;Q5EEY3;P10824	Gnai2	ENSRNOG00000016592	Guanine nucleotide-binding protein G(i) subunit alpha-1;Guanine nucleotide-binding protein G(i) subunit alpha-2	0.0218241	-0.413532	0.271334	-0.13149	-0.301124	-0.0109199	-0.0608629	-0.0512426	-0.195854	0.533566	-0.13149	0.781485	-0.0512426	0.115544	0.647096	-0.0410084	1	-0.195854	1	-0.0537605	115727000	0.0264977	0.307843	0.294038	18	18	12	62.8	62.8	43.7	40.499	0	323.31	76392000000	36843000000	39550000000	13	14	13	13	13	14	12	14	12
G3V8F5	G3V8F5;Q75Q40	Tomm40	ENSRNOG00000018556	Mitochondrial import receptor subunit TOM40 homolog	-0.132465	-1.063	0.0196212	0.214539	0.00267625	-0.346617	-0.0730219	-0.408917	-0.597734	0.421075	0.0196212	0.365343	-0.346617	0.115784	0.647096	-0.276185	1	-0.597734	0.748327	0.0789456	81883600	0.178681	0.657989	0.117733	12	12	12	51.5	51.5	51.5	37.92	0	323.31	23609000000	11321000000	12289000000	7	10	7	7	6	7	6	7	7
P70608	P70608;P30823;A0A0G2K3I1;B5D5N9-2	Slc7a1	ENSRNOG00000000924;ENSRNOG00000011016	Cationic amino acid transporter 2;High affinity cationic amino acid transporter 1	-0.170045	-1.26667	-0.189964	-2.86218	-0.0553879	-0.337973	-0.265221	-0.0611435	-0.718356	0.415044	-0.189964	0.374651	-0.265221	0.116115	0.647096	-0.221446	1	-0.718356	0.758199	-1.03584	32170500	0.143512	0.775429	1.58309	6	6	6	13.8	13.8	13.8	67.268	0	86.941	2756500000	1451200000	1305300000	2	5	2	4	4	3	2	4	3
Q4V8B3	Q4V8B3	Med24	ENSRNOG00000008711	Mediator of RNA polymerase II transcription subunit 24	-0.218649	-0.425871	-0.12104	0.102875	-0.000353862	-0.284825	NaN	-0.414461	-0.32226	0.198037	-0.000353862	0.932691	-0.349643	0.116693	0.647096	-0.349643	1	-0.32226	1	-0.00617315	86416500	0.0916661	0.146528	0.112071	11	11	11	16.7	16.7	16.7	110.08	0	56.701	1059700000	477550000	582100000	4	2	0	0	0	2	1	0	1
B2RYN4	B2RYN4;D3Z9P5	Pole4	ENSRNOG00000006102		0.721824	0.0365902	NaN	-0.104267	0.276791	NaN	0.220206	0.320457	0.379207	0.467756	0.0862618	0.729349	0.270332	0.116718	0.647096	0.270332	1	0.379207	0.999556	0.0862618	178171000	0.0708881	0.484534	0.269449	2	2	2	34.6	34.6	34.6	10.87	0	38.554	682540000	304310000	378230000	0	0	1	0	2	1	1	1	1
P21775	P21775;P07871;F1LPD6;P21775-2	Acaa1a	ENSRNOG00000032908	3-ketoacyl-CoA thiolase A, peroxisomal;3-ketoacyl-CoA thiolase B, peroxisomal	-0.827716	-0.669218	0.209762	0.172022	0.172728	-0.0335063	-0.188606	-0.184999	-0.748467	0.0671563	0.172728	0.00451647	-0.184999	0.117388	0.647096	-0.135704	1	-0.748467	0.609869	0.184837	127235000	0.0885238	0.112075	0.0215886	19	19	19	65.1	65.1	65.1	43.833	0	323.31	30337000000	13985000000	16352000000	8	11	13	11	11	12	12	12	13
Q6S395	Q6S395;P30427-2	Plec		Plectin	1.26391	0.158337	NaN	NaN	0.478817	0.746485	NaN	0.511639	0.711124	0.42066	0.478817	1	0.629062	0.117481	0.647096	0.629062	1	0.711124	1	0.478817	NaN	0.166061	0.781759	NaN	263	3	3	61.7	0.6	0.6	517.53	0	34.39	652640000	312660000	339970000	168	170	158	156	158	161	170	175	159
M0R623	M0R623	Gtpbp4	ENSRNOG00000016217	Nucleolar GTP-binding protein 1	0.10136	0.340714	-0.323809	-0.781183	-0.526106	0.0676844	0.279209	0.374108	0.221037	0.315917	-0.526106	0.0544416	0.279209	0.1175	0.647096	0.240334	1	0.221037	0.609869	-0.543699	64881100	0.156867	0.169248	0.229194	28	28	8	46.9	46.9	13.8	74.172	0	262.74	57921000000	28110000000	29811000000	15	15	15	14	14	14	12	15	13
G3V9M1	G3V9M1	Ddx23	ENSRNOG00000036954		0.270704	0.303655	0.206503	-0.219467	-0.151197	0.406301	0.280748	0.0768838	0.287179	0.0364823	-0.151197	0.718883	0.280748	0.117553	0.647096	0.254644	1	0.287179	0.993486	-0.0547205	114829000	0.166253	0.0232995	0.228787	34	34	34	49.3	49.3	49.3	95.495	0	179.72	33787000000	16192000000	17596000000	13	11	12	12	15	14	17	17	19
A0A0G2K7C2	A0A0G2K7C2;D3ZX13	Kif20b	ENSRNOG00000018929	Kinesin-like protein	0.508327	0.27399	0.300065	0.630189	-0.486336	0.975068	0.5698	0.210716	0.391159	0.185279	0.300065	0.698725	0.5698	0.117729	0.647096	0.585195	1	0.391159	0.979817	0.147973	260440000	0.382409	0.165701	0.573591	14	14	14	12.3	12.3	12.3	198.7	0	90.443	3017600000	1335500000	1682100000	4	6	6	2	4	5	2	2	2
M0RCH6	M0RCH6;D4A9Z8	Chmp4b	ENSRNOG00000034071;ENSRNOG00000046585		-1.10345	-1.82354	-0.123834	NaN	0.577373	-0.147122	-0.544583	-0.253136	-1.4635	0.15357	0.226769	0.634504	-0.253136	0.117734	0.647096	-0.314947	1	-1.4635	0.933946	0.226769	111714000	0.205814	0.509183	0.495828	6	6	6	42.8	42.8	42.8	24.812	0	59.307	4105400000	2026900000	2078400000	3	1	3	3	2	1	3	2	2
Q6MGB8	Q6MGB8;P16391;P15978;Q6MG34;Q4FZX6;F7EWE4	RT1-A2	ENSRNOG00000050210	Class I histocompatibility antigen, Non-RT1.A alpha-1 chain;RT1 class I histocompatibility antigen, AA alpha chain	-0.167159	-0.710701	0.433886	0.286001	0.0890211	-0.478266	-0.115116	-0.249353	-0.43893	0.352938	0.286001	0.114205	-0.249353	0.117785	0.647096	-0.280912	1	-0.43893	0.638884	0.269636	155870	0.183621	0.384342	0.173014	6	6	0	16.4	16.4	0	41.393	0	43.727	2526800000	1185200000	1341600000	2	2	1	3	2	2	3	2	2
D4A1Z7	D4A1Z7	Ttf1	ENSRNOG00000039777		0.851347	0.215238	-0.233292	-0.576229	-0.633955	0.990077	0.789074	0.173335	0.533293	0.342353	-0.576229	0.0613893	0.789074	0.117849	0.647096	0.650828	1	0.533293	0.609869	-0.481158	12988400	0.425559	0.449797	0.216591	4	4	4	6.3	6.3	6.3	98.688	0	126.35	1779900000	880850000	899100000	2	1	1	1	3	1	1	2	1
Q5XIE0	Q5XIE0	Anp32e	ENSRNOG00000021168	Acidic leucine-rich nuclear phosphoprotein 32 family member E	-0.215641	-1.90263	-0.0232105	0.57305	0.816271	-0.069186	-0.389473	-0.388978	-1.05914	0.428153	0.57305	0.209385	-0.388978	0.117877	0.647096	-0.282546	1	-1.05914	0.66568	0.45537	217531000	0.184775	1.19288	0.431936	7	7	7	30.6	30.6	30.6	29.418	0	323.31	13704000000	6744600000	6958900000	4	5	5	5	5	5	2	4	2
O35532	O35532	Msmo1	ENSRNOG00000032297	Methylsterol monooxygenase 1	-0.157628	-0.257639	0.722683	0.19705	-0.261473	-0.239721	-0.102568	-0.0702791	-0.207633	0.150456	0.19705	0.520984	-0.102568	0.117946	0.647096	-0.137523	1	-0.207633	0.855812	0.21942	26738400	0.0899669	0.0707186	0.492459	7	7	7	40.3	40.3	40.3	34.963	0	190.28	34796000000	14781000000	20015000000	6	5	5	5	4	5	5	5	5
Q9R0T4	Q9R0T4;A0A0G2K728	Cdh1	ENSRNOG00000020151	Cadherin-1;E-Cad/CTF1;E-Cad/CTF2;E-Cad/CTF3	0.21455	0.474423	0.40337	0.0537472	-0.00631375	0.136976	0.25093	0.0575603	0.344487	0.229621	0.0537472	0.360487	0.136976	0.11806	0.647096	0.148489	1	0.344487	0.747663	0.150268	49636000	0.0971975	0.183758	0.22124	20	20	20	34.9	34.9	34.9	98.714	0	323.31	25176000000	11028000000	14148000000	9	12	14	13	9	11	9	8	5
Q5M920	Q5M920;A0A096MIZ8	Ebna1bp2	ENSRNOG00000045760;ENSRNOG00000050287		0.172941	0.400884	-0.355433	-0.650618	-0.445582	0.0544025	0.318561	0.279522	0.286913	0.240718	-0.445582	0.0310681	0.279522	0.118359	0.647096	0.217495	1	0.286913	0.609869	-0.483878	141351000	0.142585	0.16118	0.151273	11	11	11	37.1	37.1	37.1	34.744	0	131.38	21810000000	10679000000	11131000000	7	8	7	6	8	7	8	7	8
D4ACS0	D4ACS0;Q10728-2;D4A1S6;Q10728-3;D3ZR53;A0A0G2JWJ0;Q10728	Ppp1r12a	ENSRNOG00000004925	Protein phosphatase 1 regulatory subunit;Protein phosphatase 1 regulatory subunit 12A	1.67422	1.07968	0.145967	0.199886	0.227375	0.71617	0.892819	2.26161	1.37695	0.135364	0.199886	0.0152995	0.892819	0.118374	0.647096	1.2902	1	1.37695	0.609869	0.191076	51419600	0.845889	0.420409	0.0414127	15	15	14	22.4	22.4	20.9	109.11	0	69.83	3416500000	1356400000	2060100000	4	4	2	4	6	5	2	3	2
D4A517	D4A517	Slc39a10	ENSRNOG00000011677		0.439357	NaN	NaN	NaN	NaN	0.119603	0.0816877	NaN	0.439357	1	NaN	1	0.100646	0.118527	0.647096	0.100646	1	0.439357	1	NaN	59727000	0.0268105	NaN	NaN	3	3	3	5.8	5.8	5.8	94.306	0.0099531	2.1542	152780000	73026000	79749000	2	2	2	1	2	0	0	0	0
Q4V7D7	Q4V7D7	Rbm22	ENSRNOG00000019235	Pre-mRNA-splicing factor RBM22	-0.123512	0.250087	-0.0313416	-0.230662	-0.0849532	0.257421	0.056263	0.146717	0.0632874	0.792041	-0.0849532	0.19162	0.146717	0.118631	0.647096	0.153467	1	0.0632874	0.650736	-0.115652	55061600	0.100749	0.264175	0.103145	10	10	10	33.3	33.3	33.3	46.863	0	167.61	6586400000	3000400000	3585900000	4	6	4	4	4	2	4	5	6
Q66HG8	Q66HG8;A0A0G2K5G9;Q7TPK4	Ik	ENSRNOG00000009738	Protein Red	0.233903	0.837688	-0.0793021	-0.020952	-0.145848	0.496297	0.128606	0.70167	0.535796	0.326655	-0.0793021	0.150859	0.496297	0.118663	0.647096	0.442191	1	0.535796	0.64184	-0.0820341	6370280	0.290338	0.42694	0.0624928	15	15	3	34.1	34.1	7	65.587	0	144.66	9496000000	4565900000	4930100000	7	5	7	10	6	8	9	10	7
Q5M9F1	Q5M9F1	Rbm34	ENSRNOG00000020004	RNA-binding protein 34	0.222511	0.312256	-0.270771	-0.65989	-0.772648	0.233355	0.205889	0.0396162	0.267383	0.105852	-0.65989	0.0648031	0.205889	0.118709	0.647096	0.15962	1	0.267383	0.609869	-0.56777	70541700	0.10483	0.0634595	0.263315	19	19	19	47	47	47	47.66	0	108.23	8732800000	4104300000	4628500000	4	6	4	6	5	7	7	6	9
A0A0G2KAH4	A0A0G2KAH4;D3ZY19	Dock6	ENSRNOG00000010652		0.756954	NaN	0.387555	0.914835	-0.352614	0.60065	NaN	0.88113	0.756954	1	0.387555	0.479868	0.74089	0.119094	0.647096	0.74089	1	0.756954	0.827549	0.316592	22876600	0.198329	NaN	0.636697	9	9	8	7.3	7.3	6.9	236.75	0	34.485	338030000	134650000	203380000	0	2	0	0	1	1	1	1	0
Q6TUG0	Q6TUG0	Dnajb11	ENSRNOG00000001803	DnaJ homolog subfamily B member 11	-0.115322	-0.395737	0.106011	0.220304	-0.0514888	-0.118698	-0.0929343	-0.298595	-0.255529	0.319481	0.106011	0.364927	-0.118698	0.119322	0.647096	-0.170076	1	-0.255529	0.748327	0.0916085	84829200	0.112044	0.198283	0.136467	13	13	13	40.8	40.8	40.8	40.495	0	139.86	25673000000	11482000000	14191000000	9	7	8	7	9	7	4	6	8
A0A0G2K850	A0A0G2K850;B1WC50;A0A140UHY3	Ewsr1	ENSRNOG00000046950		0.109542	-0.892694	0.0806647	0.0765483	0.288356	0.48379	0.111502	0.257878	-0.391576	0.57773	0.0806647	0.167629	0.257878	0.119535	0.647096	0.28439	1	-0.391576	0.64184	0.148523	24535700	0.187555	0.708688	0.121117	7	7	7	15.2	15.2	15.2	67.94	0	240.7	14599000000	6631300000	7968200000	6	5	6	6	6	5	4	4	2
D3ZY39	D3ZY39	Rrp1b	ENSRNOG00000001194		0.323029	0.98852	0.0379423	-0.123719	-0.282746	0.334192	0.309147	0.91504	0.655775	0.298929	-0.123719	0.315757	0.334192	0.119667	0.647096	0.51946	1	0.655775	0.720403	-0.122841	13016100	0.342812	0.470573	0.160346	18	18	18	37.2	37.2	37.2	81.475	0	234.22	3494000000	1673800000	1820200000	5	3	3	3	3	3	6	9	4
Q6AYA6	Q6AYA6	Cybc1	ENSRNOG00000036666	Uncharacterized protein C17orf62 homolog	0.418269	-1.43266	-0.222	0.329311	-0.066843	-0.421284	-0.071845	-0.412254	-0.507196	0.680837	-0.066843	0.941986	-0.412254	0.119694	0.647096	-0.301794	1	-0.507196	1	0.0134894	110012000	0.199193	1.30881	0.284299	7	7	7	35.3	35.3	35.3	20.894	0	31.632	4501500000	2219800000	2281700000	2	2	2	3	3	1	3	4	3
D3ZPQ4	D3ZPQ4	Zfp800	ENSRNOG00000007662		0.134403	0.583577	-0.297054	-0.830739	-0.27465	0.197066	0.146037	0.0345546	0.35899	0.355894	-0.297054	0.123713	0.146037	0.119743	0.647096	0.125886	1	0.35899	0.638884	-0.467481	55246400	0.0831087	0.317614	0.31479	12	12	12	28.2	28.2	28.2	74.96	0	80.357	5187100000	2583700000	2603400000	3	5	6	4	4	4	3	4	3
A0A0G2K9Y9	A0A0G2K9Y9;M0R440;A0A096MKE5	Zfp326	ENSRNOG00000047761	Zinc finger protein 326	0.220624	0.569101	-0.105912	-0.457513	-0.521542	0.465211	0.0817789	0.486422	0.394863	0.264557	-0.457513	0.107446	0.465211	0.120029	0.647096	0.344471	1	0.394863	0.631155	-0.361656	4991240	0.227745	0.24641	0.223782	14	14	14	32.5	32.5	32.5	57.056	0	55.918	7386300000	3255200000	4131100000	5	6	8	9	6	7	9	6	8
Q6TQE1	Q6TQE1;Q6TQE1-2;A0A140TAG3	Zc3h18	ENSRNOG00000028501	Zinc finger CCCH domain-containing protein 18	0.211168	0.437481	0.122292	-0.0937907	0.0329794	0.334037	0.0633772	0.382692	0.324325	0.213709	0.0329794	0.774782	0.334037	0.120166	0.647096	0.260035	1	0.324325	1	0.0204934	65917300	0.17204	0.160027	0.108581	13	13	13	21	21	21	105.54	0	184.28	11401000000	5287200000	6113900000	5	5	6	6	5	5	10	8	8
F1LM66	F1LM66;A0A1W2Q6N7	Eftud2	ENSRNOG00000002818		0.0246724	0.164114	0.00676461	-0.337092	-0.255351	0.149649	0.0248859	0.138698	0.094393	0.405004	-0.255351	0.200503	0.138698	0.120194	0.647096	0.104411	1	0.094393	0.656891	-0.195226	90705800	0.0690881	0.0985998	0.17964	54	54	53	75.1	75.1	74	109.35	0	323.31	194700000000	93342000000	101360000000	35	38	37	39	37	36	32	35	38
P61621	P61621	Sec61a1	ENSRNOG00000013743	Protein transport protein Sec61 subunit alpha isoform 1	-0.132817	-0.440398	0.0884318	0.18755	-0.0359775	-0.246172	-0.248221	-0.0419943	-0.286607	0.313528	0.0884318	0.341573	-0.246172	0.12048	0.647096	-0.178796	1	-0.286607	0.731592	0.0800015	185694000	0.118478	0.217492	0.112002	11	11	7	31.7	31.7	21.8	52.264	0	141.8	22806000000	11484000000	11322000000	5	4	5	5	5	3	6	6	6
A0A0G2K868	A0A0G2K868;A0A0G2JXS2;A0A0G2K4X2	Kri1			0.439462	0.817569	0.0186149	-0.368591	-0.406398	0.346033	0.193504	0.742629	0.628516	0.18601	-0.368591	0.20452	0.346033	0.120657	0.647096	0.427388	1	0.628516	0.660026	-0.252125	NaN	0.283458	0.267362	0.235228	10	10	10	34.7	34.7	34.7	55.883	0	143.84	2213700000	946130000	1267600000	3	2	6	3	4	3	5	4	5
P83888	P83888;F1LUW9	Tubg1	ENSRNOG00000006494;ENSRNOG00000020213	Tubulin gamma chain;Tubulin gamma-1 chain	-0.0766454	-0.301017	-0.510037	0.432986	0.467307	-0.116802	-0.0791955	NaN	-0.188831	0.341276	0.432986	0.723907	-0.0979988	0.120683	0.647096	-0.0979988	1	-0.188831	0.996833	0.130085	88848600	0.0265919	0.158655	0.554628	13	13	13	54.8	54.8	54.8	51.1	0	65.069	2058900000	919550000	1139400000	3	4	3	3	2	0	0	0	4
Q5EB56	Q5EB56	Mak16	ENSRNOG00000010783		0.0671888	0.320825	-0.0367903	-0.706079	-0.253776	0.0633069	0.201388	0.323566	0.194007	0.368575	-0.253776	0.234009	0.201388	0.120901	0.647096	0.196087	1	0.194007	0.668431	-0.332215	64386700	0.130211	0.179348	0.341469	10	10	10	35.2	35.2	35.2	34.87	0	111.06	18538000000	9028900000	9508900000	8	7	7	7	8	8	7	6	7
Q4QQW4	Q4QQW4;D3ZVU7	Hdac1	ENSRNOG00000009568;ENSRNOG00000013695	Histone deacetylase 1	0.26725	0.181064	-0.0198108	-0.356203	-0.177196	0.160783	0.332959	0.0833732	0.224157	0.120911	-0.177196	0.198174	0.160783	0.120921	0.647096	0.192372	1	0.224157	0.656711	-0.184403	118046000	0.127756	0.0609426	0.168312	15	15	11	49.6	49.6	40.2	55.092	0	323.31	45139000000	22420000000	22719000000	13	11	12	11	12	11	7	9	10
D4ADS4	D4ADS4	Mgst3	ENSRNOG00000004245		-0.148806	-0.931327	0.26112	0.465557	0.247684	-0.385367	-0.18109	-0.760485	-0.540066	0.399135	0.26112	0.0440191	-0.385367	0.121002	0.647096	-0.442314	1	-0.540066	0.609869	0.324787	90244300	0.293865	0.553326	0.122095	5	5	5	34.2	34.2	34.2	16.732	0	99.862	12162000000	5596100000	6566000000	3	4	4	3	3	3	3	3	4
P62250	P62250;A0A1W2Q631;M0R8S7;M0R4I3	Rps16	ENSRNOG00000019578;ENSRNOG00000030143;ENSRNOG00000031960	40S ribosomal protein S16	-0.5042	-1.72205	-0.0347422	0.34015	0.292566	-0.303787	-0.127514	-0.0878059	-1.11313	0.318672	0.292566	0.232807	-0.127514	0.121002	0.647096	-0.173036	1	-1.11313	0.668431	0.199324	86620600	0.114962	0.861152	0.204099	10	10	10	54.1	54.1	54.1	16.445	0	95.732	82502000000	41549000000	40953000000	7	7	8	7	8	8	7	8	5
A0JN27	A0JN27	Gtf2h2	ENSRNOG00000018230	General transcription factor IIH subunit 2	0.495074	0.870108	-0.359702	0.0683034	-0.358976	0.1956	0.369596	0.773682	0.682591	0.170678	-0.358976	0.267689	0.369596	0.121047	0.647096	0.446292	1	0.682591	0.687284	-0.216791	49654300	0.296574	0.265189	0.2469	5	5	5	17.2	17.2	17.2	44.703	0	11.667	845210000	393730000	451480000	0	2	2	1	1	2	1	2	1
Q68FV2	Q68FV2	Arl6ip6	ENSRNOG00000005074	ADP-ribosylation factor-like protein 6-interacting protein 6	0.648855	0.138683	0.308827	0.190804	NaN	0.443972	0.574	0.0958569	0.393769	0.365949	0.249816	0.147675	0.443972	0.12145	0.647096	0.371276	1	0.393769	0.641577	0.249816	43839900	0.247222	0.360746	0.0834545	2	2	2	8.5	8.5	8.5	24.596	0.0080076	2.3178	346240000	129270000	216970000	1	1	1	1	1	1	0	2	2
P35571	P35571;F1LNI0;A0A0G2K0Z7;A0A0G2K1F9	Gpd2	ENSRNOG00000033824	Glycerol-3-phosphate dehydrogenase;Glycerol-3-phosphate dehydrogenase, mitochondrial	0.000521111	-0.914824	0.0456714	0.125193	-0.0703955	-0.312613	-0.0608247	-0.193823	-0.457152	0.500363	0.0456714	0.615126	-0.193823	0.121535	0.647096	-0.189087	1	-0.457152	0.921278	0.0334898	48327100	0.125961	0.647247	0.0983618	33	33	33	64.2	64.2	64.2	80.972	0	268.34	39907000000	18992000000	20915000000	19	20	13	14	15	15	14	16	14
Q9QZ86	Q9QZ86;Q5PPK6	Nop58	ENSRNOG00000016486	Nucleolar protein 58	0.107662	0.252443	-0.234854	-0.621084	-0.472283	0.162112	0.0761304	0.321053	0.180052	0.243364	-0.472283	0.0588886	0.162112	0.121644	0.647096	0.186432	1	0.180052	0.609869	-0.44274	66300000	0.12426	0.102376	0.194803	27	27	27	56.4	56.4	56.4	60.07	0	323.31	214220000000	104780000000	109440000000	22	22	22	20	21	21	21	23	22
B2RZ37	B2RZ37	Reep5	ENSRNOG00000020167	Receptor expression-enhancing protein 5	-0.00691045	-1.32584	0.304394	-1.65206	-0.218831	-0.229912	-0.09879	-0.435979	-0.666378	0.496682	-0.218831	0.466125	-0.229912	0.121747	0.647096	-0.254894	1	-0.666378	0.815676	-0.522164	26842000	0.169977	0.932627	1.01288	6	6	6	22.2	22.2	22.2	21.431	0	13.037	6181900000	3114300000	3067600000	1	1	1	1	1	2	1	1	1
F7FHT4	F7FHT4	Sema3			0.580068	0.281928	-0.359811	-1.01483	-0.9933	0.0671077	0.0825081	0.214276	0.430998	0.21199	-0.9933	0.0667532	0.0825081	0.121751	0.647096	0.121297	1	0.430998	0.609869	-0.789315	NaN	0.0808893	0.210817	0.372117	16	16	16	32.9	32.9	32.9	85.962	0	101.09	5216600000	2857400000	2359200000	2	2	1	2	2	2	2	5	3
Q09167	Q09167;Q09167-2	Srsf5	ENSRNOG00000005513	Serine/arginine-rich splicing factor 5	-0.0688211	-0.0893633	-0.123435	0.189314	0.372281	0.197821	0.0382548	0.122915	-0.0790922	0.0822129	0.189314	0.419137	0.122915	0.121834	0.647096	0.119664	1	-0.0790922	0.784361	0.146053	112776000	0.0798328	0.0145255	0.250673	8	7	7	25.7	22.3	22.3	30.891	0	56.37	11684000000	5535800000	6148400000	8	7	6	5	5	4	5	5	5
Q9Z0V5	Q9Z0V5	Prdx4	ENSRNOG00000003763	Peroxiredoxin-4	-0.192027	-0.983312	0.526374	0.528194	0.0505932	-0.0551195	-0.143595	-0.257682	-0.58767	0.377222	0.526374	0.146296	-0.143595	0.121946	0.647096	-0.152132	1	-0.58767	0.641577	0.368387	43801300	0.101551	0.559523	0.275219	13	11	11	57.1	54.2	54.2	31.007	0	323.31	70454000000	32794000000	37660000000	9	11	9	10	10	9	9	8	8
Q5XIM7	Q5XIM7	Kars	ENSRNOG00000019456	Lysine--tRNA ligase	-0.143253	-1.8144	-0.0691203	0.541524	0.55134	-0.307384	-0.302704	-0.0504597	-0.978824	0.449841	0.541524	0.238216	-0.302704	0.121984	0.647096	-0.220183	1	-0.978824	0.668431	0.341248	55018800	0.147003	1.18168	0.355423	29	29	29	58.1	58.1	58.1	71.622	0	323.31	45358000000	22474000000	22885000000	15	15	14	13	12	12	14	15	11
O55162	O55162	Lypd3	ENSRNOG00000019999	Ly6/PLAUR domain-containing protein 3	0.295673	0.257755	0.368609	0.150434	-0.444954	0.549859	0.173469	0.20964	0.276714	0.0435497	0.150434	0.928358	0.20964	0.122009	0.647096	0.31099	1	0.276714	1	0.0246962	82757300	0.207656	0.026812	0.421104	3	3	3	13.9	13.9	13.9	36.96	0	188.67	4244900000	1975400000	2269600000	1	1	1	1	1	1	1	1	1
Q3SWS8	Q3SWS8	Rae1	ENSRNOG00000021295	mRNA export factor	0.360053	0.10815	-0.151377	-0.354975	-0.387303	0.655053	0.505636	0.108287	0.234101	0.314236	-0.354975	0.0563138	0.505636	0.122119	0.647096	0.422992	1	0.234101	0.609869	-0.297885	177082000	0.282597	0.178123	0.127905	12	12	12	64.1	64.1	64.1	40.919	0	212.87	8810100000	4382800000	4427300000	6	6	8	8	4	8	5	4	6
D3ZWU9	D3ZWU9	Rmnd5a	ENSRNOG00000028422		NaN	NaN	0.57889	-0.0875034	0.400756	-0.837764	-1.24185	NaN	NaN	1	0.400756	0.274015	-1.03981	0.122178	0.647096	-1.03981	1	NaN	0.691904	0.297381	164032000	0.285732	NaN	0.345015	4	4	4	15.6	15.6	15.6	43.992	0	15.776	207550000	99134000	108410000	1	1	0	1	0	0	0	0	0
B5DFL9	B5DFL9	Sestd1	ENSRNOG00000012603		0.0341391	-1.95517	NaN	NaN	-0.0532466	-0.0478466	-0.0710575	NaN	-0.960517	0.511115	-0.0532466	1	-0.059452	0.122729	0.649295	-0.059452	1	-0.960517	1	-0.0532466	70613800	0.0164126	1.40666	NaN	5	5	5	10.6	10.6	10.6	79.421	0	6.4791	193560000	95373000	98183000	1	1	1	0	2	1	0	0	0
A0A0G2JXM6	A0A0G2JXM6;G3V8X1;Q6AXT7	Rbm42	ENSRNOG00000024278	RNA-binding protein 42	0.262775	0.280665	-0.0488361	-0.31617	-0.19175	0.524027	0.168116	0.193979	0.27172	0.0209508	-0.19175	0.138183	0.193979	0.123247	0.650946	0.295374	1	0.27172	0.641577	-0.185585	90254900	0.198441	0.0126507	0.133773	10	10	10	39.2	39.2	39.2	47.244	0	194.53	4448400000	1856800000	2591700000	1	5	4	4	3	4	4	6	3
D3ZXD8	D3ZXD8;D3ZR79	Tmem245	ENSRNOG00000026271	Transmembrane protein 245	NaN	NaN	NaN	NaN	NaN	-0.520479	-0.868042	-0.169842	NaN	1	NaN	1	-0.520479	0.123314	0.650946	-0.519454	1	NaN	1	NaN	78074000	0.349101	NaN	NaN	2	2	2	4.7	4.7	4.7	97.281	0	21.506	218490000	114510000	103980000	1	2	0	1	1	0	0	1	0
D3ZL85	D3ZL85	Hccs	ENSRNOG00000025910		-0.0309978	-0.703755	0.24026	0.115572	0.0650775	-0.408724	-0.113016	-0.17382	-0.367377	0.471977	0.115572	0.114513	-0.17382	0.123763	0.652001	-0.231854	1	-0.367377	0.638884	0.140303	26698900	0.156162	0.475712	0.0901719	10	10	10	50	50	50	31.129	0	108.61	10922000000	5121200000	5800800000	7	7	5	5	6	6	4	3	3
D3ZT71	D3ZT71	Bcl2l13	ENSRNOG00000012394		0.801267	-0.544749	0.298448	0.161694	0.0962785	0.674044	0.217052	0.246861	0.128259	0.880113	0.161694	0.089494	0.246861	0.123912	0.652001	0.379319	1	0.128259	0.61309	0.185473	220475000	0.255674	0.951777	0.103161	8	8	8	33.2	33.2	33.2	46.734	0	161.56	5656600000	2409900000	3246700000	5	4	1	4	3	2	3	2	2
Q5I0M7	Q5I0M7;P04256;Q6P6G9;D4ACJ7;F1M6C7	Hnrnpa1	ENSRNOG00000011100;ENSRNOG00000046286;ENSRNOG00000050603	Heterogeneous nuclear ribonucleoprotein A1;Heterogeneous nuclear ribonucleoprotein A1, N-terminally processed	0.20587	0.407982	-0.0450937	-0.508141	-0.329009	0.330979	0.0549807	0.239969	0.306926	0.202492	-0.329009	0.160895	0.239969	0.123924	0.652001	0.208643	1	0.306926	0.64184	-0.294081	14895800	0.140641	0.142915	0.233491	21	19	13	72.2	69.4	47.8	34.196	0	323.31	174950000000	82306000000	92644000000	13	13	13	13	12	13	13	10	12
D3ZC01	D3ZC01	Rbbp5	ENSRNOG00000021289		-0.230383	0.338386	-0.283244	-0.148184	-0.226496	0.145482	0.455043	0.167413	0.0540016	0.880535	-0.226496	0.0304267	0.167413	0.124153	0.652482	0.255979	1	0.0540016	0.609869	-0.219308	54325700	0.172743	0.40218	0.0678161	9	9	9	28.8	28.8	28.8	59.049	0	46.338	1308800000	633800000	675020000	2	1	3	1	2	2	3	2	2
B2GV01	B2GV01	Mta2	ENSRNOG00000019913		0.670536	0.214462	-0.0240651	-0.447201	-0.0929286	0.36679	0.450915	0.0702012	0.442499	0.302931	-0.0929286	0.28783	0.36679	0.124424	0.652482	0.295969	1	0.442499	0.697885	-0.188065	232078000	0.199994	0.322493	0.227044	32	32	29	63.9	63.9	59.4	74.959	0	296.58	24957000000	11216000000	13741000000	16	17	17	15	15	14	11	13	17
D4A4Y0	D4A4Y0	Exosc4	ENSRNOG00000012348		0.235599	0.332235	-0.0193621	-0.344623	-0.302204	0.221753	0.406382	0.0857035	0.283917	0.107314	-0.302204	0.161613	0.221753	0.124633	0.652482	0.237946	1	0.283917	0.64184	-0.222063	117378000	0.160951	0.0683321	0.176821	7	7	7	38.4	38.4	38.4	26.391	0	137.16	4315300000	2001700000	2313600000	3	3	3	2	2	1	2	3	4
F7FJQ3	F7FJQ3	Npc2			-0.497788	-2.60666	0.237146	0.194573	-0.488979	-0.530551	-1.40729	-2.54979	-1.55222	0.379872	0.194573	0.942728	-1.40729	0.124773	0.652482	-1.49588	1	-1.55222	1	-0.0190867	NaN	1.01253	1.4912	0.407495	3	3	3	19.7	19.7	19.7	16.748	0	31.529	3712100000	2352900000	1359100000	3	3	3	1	2	3	2	1	2
Q32KK0	Q32KK0	Arse	ENSRNOG00000028350		-0.09336	-0.400158	0.387697	0.0618325	-0.0179279	-0.253962	-0.275292	-0.0420833	-0.246759	0.354082	0.0618325	0.36595	-0.253962	0.124802	0.652482	-0.190446	1	-0.246759	0.74856	0.143867	142503000	0.128928	0.216939	0.214896	8	8	8	18.7	18.7	18.7	65.675	0	62.175	3042900000	1374000000	1668900000	3	4	4	5	4	4	4	5	4
B5DF91	B5DF91	Elavl1	ENSRNOG00000001069	ELAV-like protein	0.198756	0.17465	0.00304618	-0.39592	-0.404668	0.359856	0.121968	0.124059	0.186703	0.0410404	-0.39592	0.18667	0.124059	0.124836	0.652482	0.201961	1	0.186703	0.64896	-0.265847	4614830	0.136745	0.0170451	0.23291	16	16	16	61.3	61.3	61.3	36.169	0	323.31	109150000000	50909000000	58241000000	13	12	13	12	13	13	10	13	11
Q5XIT8	Q5XIT8	Cldn4	ENSRNOG00000001476	Claudin	0.724999	1.61882	0.236234	-0.3972	0.113578	0.890866	0.3314	0.278025	1.17191	0.231938	0.113578	0.942509	0.3314	0.125355	0.654477	0.500097	1	1.17191	1	-0.0157961	26761500	0.339467	0.632025	0.335951	3	3	3	29.5	29.5	29.5	22.432	0	61.006	11623000000	5215400000	6407900000	2	2	2	2	2	3	2	2	2
P81795	P81795;C9WPN6;A0A096MJB9;A0A1P0QU16	Eif2s3	ENSRNOG00000006186	Eukaryotic translation initiation factor 2 subunit 3	-0.494772	-1.7563	-0.0170512	0.434463	0.389743	-0.512389	-0.673138	-0.105482	-1.12554	0.325187	0.389743	0.20191	-0.512389	0.125689	0.655505	-0.430336	1	-1.12554	0.656891	0.269052	63800200	0.292588	0.892037	0.248779	20	20	20	53	53	53	51.079	0	323.31	70572000000	35139000000	35433000000	14	14	16	15	13	12	8	10	10
D4AE78	D4AE78;M0R963	Knop1	ENSRNOG00000046147;ENSRNOG00000048270		0.680093	0.479742	-0.384979	0.00821348	-0.472667	0.328966	1.17108	0.47986	0.579918	0.108895	-0.384979	0.19559	0.47986	0.125828	0.655512	0.659968	1	0.579918	0.652429	-0.283144	195411000	0.449019	0.141669	0.256104	12	12	12	33.6	33.6	33.6	58.139	0	58.607	1430900000	700510000	730430000	1	2	0	2	1	1	3	3	1
Q62656-2	Q62656-2;F1LMY3;Q62656	Ptprz1	ENSRNOG00000006030	Protein-tyrosine-phosphatase;Receptor-type tyrosine-protein phosphatase zeta	NaN	NaN	NaN	NaN	NaN	-0.412424	-0.619359	NaN	NaN	1	NaN	1	-0.515891	0.126009	0.655743	-0.515891	1	NaN	1	NaN	49730600	0.146325	NaN	NaN	1	1	1	1.1	1.1	1.1	164.59	0.0018821	3.624	13301000	6969600	6331000	0	1	0	1	0	0	0	0	0
D3ZQL1	D3ZQL1	Emc7	ENSRNOG00000005884		-0.0207316	-0.284094	-0.0636367	0.166577	-0.201992	-0.342538	-0.137953	-0.0971708	-0.152413	0.453625	-0.0636367	0.787754	-0.137953	0.126574	0.656646	-0.192554	1	-0.152413	1	-0.0330173	110539000	0.131481	0.186225	0.186182	5	5	5	36.5	36.5	36.5	26.44	0	40.533	7370400000	3520800000	3849600000	3	3	3	5	4	3	2	3	2
Q9Z2Q1-2	Q9Z2Q1-2;A0A0G2K0X9;G3V699;Q9Z2Q1	Sec31a	ENSRNOG00000002251	Protein transport protein Sec31A	-0.102783	-1.39913	-0.0978308	0.508666	0.421101	0.383332	0.161306	0.10369	-0.750955	0.453316	0.421101	0.280488	0.161306	0.126703	0.656646	0.216109	1	-0.750955	0.696458	0.277312	10801900	0.147657	0.916653	0.32782	23	23	23	33.8	33.8	33.8	116.88	0	192.89	6194600000	2816900000	3377700000	6	5	8	8	7	9	8	11	11
M0R7B4	M0R7B4	H4f3	ENSRNOG00000048264	H1.3 linker histone, cluster member	0.324923	0.415969	-0.0812969	-0.722038	-0.742824	0.947826	0.173212	0.580048	0.370446	0.077842	-0.722038	0.140918	0.580048	0.126729	0.656646	0.567029	1	0.370446	0.641577	-0.515386	45494200	0.387471	0.0643792	0.376076	9	1	1	28.6	7.3	7.3	22.233	0	27.065	104110000000	48623000000	55487000000	8	9	8	7	7	8	7	7	6
D3ZT03	D3ZT03;A0A0U1RRY8;A0A0U1RRS6	Upf2	ENSRNOG00000023593		0.595313	NaN	-0.308287	0.39594	-0.143532	0.258941	0.390117	NaN	0.595313	1	-0.143532	0.938187	0.324529	0.126953	0.656646	0.324529	1	0.595313	1	-0.0186264	77825300	0.0927558	NaN	0.368355	2	2	2	1.3	1.3	1.3	148.59	0.0094607	2.2212	274790000	131100000	143690000	0	1	0	1	1	0	0	0	0
O35795	O35795;F1M7N2;O35795-2	Entpd2	ENSRNOG00000013102	Ectonucleoside triphosphate diphosphohydrolase 2	-0.0901974	-0.32843	0.580835	-0.153178	-0.0798636	-0.336747	-0.527359	-0.0917379	-0.209314	0.329371	-0.0798636	0.668637	-0.336747	0.127353	0.656646	-0.318615	1	-0.209314	0.961066	0.115931	2599310	0.218376	0.168456	0.404284	5	5	5	16.8	16.8	16.8	54.389	0	86.761	3148200000	1810700000	1337400000	2	1	1	1	1	2	1	1	1
F1M7X3	F1M7X3;Q8R490	Cdh13	ENSRNOG00000014371		0.0888467	0.420349	0.566687	0.277236	0.333897	0.273333	0.165542	0.633695	0.254598	0.367393	0.333897	0.0473044	0.273333	0.127459	0.656646	0.357523	1	0.254598	0.609869	0.392606	62077000	0.245169	0.234407	0.153397	4	4	4	10.8	10.8	10.8	66.473	0	39.104	1058000000	452690000	605280000	2	3	3	3	3	3	3	3	2
D3ZAR9	D3ZAR9	Chrac1	ENSRNOG00000009103		0.189576	-0.0988082	0.0749587	-0.0523413	-0.393198	0.390464	0.0565962	0.340961	0.0453837	0.805876	-0.0523413	0.469998	0.340961	0.127517	0.656646	0.262674	1	0.0453837	0.818552	-0.123527	114259000	0.180177	0.203918	0.24206	3	3	3	40.6	40.6	40.6	14.011	0	34.594	1744500000	739090000	1005400000	2	3	3	2	1	2	0	1	1
G3V8P6	G3V8P6;Q9QZ48	Zbtb7a	ENSRNOG00000020161	Zinc finger and BTB domain-containing protein 7A	0.378784	0.606245	0.177779	-0.376393	0.0247385	0.366285	0.516246	1.29323	0.492514	0.144475	0.0247385	0.759263	0.516246	0.127554	0.656646	0.725254	1	0.492514	1	-0.0579586	11599400	0.497565	0.16084	0.286192	10	10	10	24.1	24.1	24.1	60.541	0	72.314	909860000	405680000	504180000	1	3	1	4	1	2	2	5	3
D3ZUV3	D3ZUV3	Eif2a	ENSRNOG00000013393		0.0834003	-2.39913	0.133215	0.886016	0.550533	-0.626356	-0.631758	-0.0933119	-1.15787	0.522122	0.550533	0.138165	-0.626356	0.127739	0.656646	-0.450475	1	-1.15787	0.641577	0.523255	168140000	0.309324	1.75542	0.377141	21	21	21	54.8	54.8	54.8	65.348	0	118.04	7134000000	3272700000	3861300000	4	6	4	5	6	7	4	4	4
O55000	O55000;A0A0G2K3G9	Ppp1r10		Serine/threonine-protein phosphatase 1 regulatory subunit 10	1.21646	0.779959	0.0145957	-0.18611	-0.451816	1.57361	1.01435	0.26975	0.998212	0.137036	-0.18611	0.263844	1.01435	0.127748	0.656646	0.952571	1	0.998212	0.682192	-0.207777	NaN	0.654124	0.308655	0.23396	15	15	15	28	28	28	92.827	0	107.49	3137000000	1353300000	1783700000	6	6	7	6	5	6	9	6	3
B2RZ66	B2RZ66	Srp19	ENSRNOG00000020204		0.0988761	-0.684968	0.0416744	0.409395	0.257296	0.0964114	0.0616626	0.016639	-0.293046	0.591267	0.257296	0.157321	0.0616626	0.127774	0.656646	0.0582377	1	-0.293046	0.64184	0.236122	26828300	0.0399963	0.554261	0.184772	4	4	4	43.8	43.8	43.8	16.138	0	24.154	1477300000	681810000	795530000	2	1	1	2	1	1	0	1	1
G3V8U3	G3V8U3;A0A0G2K948	Dpf2	ENSRNOG00000020892		0.57044	0.58328	0.0635719	-0.481793	-0.394275	0.608863	0.0922744	0.457987	0.57686	0.00708461	-0.394275	0.250401	0.457987	0.127995	0.656646	0.386375	1	0.57686	0.672969	-0.270832	228187000	0.265636	0.00907902	0.292889	11	11	11	43.2	43.2	43.2	44.215	0	54.434	2796100000	1284500000	1511600000	5	3	4	4	4	6	5	4	5
P53812	P53812;P53812-2;D3ZCD4	Pitpnb	ENSRNOG00000000665	Phosphatidylinositol transfer protein beta isoform	NaN	NaN	NaN	-0.369613	0.163458	-0.577358	-1.31421	-0.334119	NaN	1	-0.103077	0.765078	-0.577358	0.128111	0.656646	-0.741894	1	NaN	1	-0.103077	53020800	0.510339	NaN	0.376938	10	10	9	43.9	43.9	40.6	31.45	0	18.244	1555100000	829570000	725490000	2	0	1	1	0	0	2	1	0
A0A0A0MXU8	A0A0A0MXU8;Q2IBC5	Cav2	ENSRNOG00000006411	Caveolin;Caveolin-2	0.190247	0.885028	NaN	NaN	0.578633	0.183201	0.389532	0.803723	0.537637	0.365203	0.578633	1	0.389532	0.128372	0.656646	0.458818	1	0.537637	1	0.578633	45179500	0.31601	0.491284	NaN	5	5	5	48.1	48.1	48.1	18.236	0	11.357	611450000	249950000	361500000	3	0	1	1	1	3	1	1	1
A0A0G2JTH1	A0A0G2JTH1	Nkrfl			0.136016	0.363114	-0.166786	-0.185538	-0.583582	0.105186	0.623233	0.403185	0.249565	0.271832	-0.185538	0.148624	0.403185	0.128536	0.656646	0.377202	1	0.249565	0.641577	-0.311969	NaN	0.259999	0.160582	0.235411	19	19	7	40.7	40.7	18	64.357	0	151.2	7881000000	3798600000	4082300000	8	8	7	6	6	5	4	6	4
Q5I034	Q5I034	Custos	ENSRNOG00000001185	Uncharacterized protein C12orf43 homolog	0.606764	0.609421	NaN	NaN	0.126002	0.886618	0.621169	2.21918	0.608093	0.00139044	0.126002	1	0.886618	0.12854	0.656646	1.24232	0.986091	0.608093	1	0.126002	49226800	0.856329	0.00187827	NaN	5	5	5	32.9	32.9	32.9	30.056	0	26.454	446770000	166340000	280430000	1	1	1	1	1	1	1	1	2
Q63135-2	Q63135-2;Q63135;A0A0G2K7Y0	Cr1l		Complement component receptor 1-like protein	-0.44695	0.198592	0.536421	-0.0530713	-0.272665	-0.254824	-0.267477	-0.0382865	-0.124179	0.766188	-0.0530713	0.798638	-0.254824	0.128576	0.656646	-0.186863	1	-0.124179	1	0.070228	NaN	0.128826	0.456467	0.418398	10	10	10	33.4	33.4	33.4	54.786	0	128.56	6176300000	3012000000	3164300000	5	6	5	4	4	5	4	5	4
Q6TUH4	Q6TUH4	Thoc1	ENSRNOG00000015332		0.756184	0.387554	0.0539325	-0.329246	-0.425557	0.556336	1.07635	0.227013	0.571869	0.198492	-0.329246	0.251691	0.556336	0.128994	0.656646	0.619899	1	0.571869	0.672969	-0.233624	1185640	0.428221	0.260661	0.253644	11	11	9	24.4	24.4	20	57.153	0	41.269	5613700000	2574800000	3038900000	5	6	3	3	4	4	3	4	6
D3ZN27	D3ZN27	Dnajc13	ENSRNOG00000011491		-0.0587928	-0.589139	0.0991764	0.453581	0.14603	-0.252412	-0.0464384	-0.320055	-0.323966	0.436679	0.14603	0.171094	-0.252412	0.129002	0.656646	-0.206302	1	-0.323966	0.642735	0.232929	112085000	0.142517	0.375012	0.192521	43	43	43	29.2	29.2	29.2	254.51	0	219.53	6785100000	2978000000	3807100000	15	15	12	14	11	13	4	8	6
Q5XIL2	Q5XIL2	Pi4k2b	ENSRNOG00000003924	Phosphatidylinositol 4-kinase type 2-beta	-0.670199	NaN	NaN	NaN	NaN	-0.725208	-0.477904	NaN	-0.670199	1	NaN	1	-0.601556	0.129062	0.656646	-0.601556	1	-0.670199	1	NaN	60685800	0.17487	NaN	NaN	2	2	2	4.2	4.2	4.2	54.464	0.006886	2.3532	43619000	23550000	20068000	1	0	0	1	1	0	0	0	0
P19139	P19139	Csnk2a1	ENSRNOG00000005276	Casein kinase II subunit alpha	-0.195928	-0.309042	-0.126236	-0.215963	0.178311	-0.179968	-0.0671536	-0.0536569	-0.252485	0.140288	-0.126236	0.691987	-0.0671536	0.129299	0.656646	-0.100259	1	-0.252485	0.973801	-0.0546293	154062000	0.0693587	0.0799835	0.20666	18	18	18	55.2	55.2	55.2	45.073	0	176.63	28188000000	13529000000	14659000000	11	12	12	10	8	10	4	5	7
A0A0G2K417	A0A0G2K417;A4L9P8;A0A0G2K773	Cep295	ENSRNOG00000010999	Centrosomal protein of 295 kDa	2.82292	4.7854	NaN	NaN	NaN	NaN	2.86661	1.88694	3.80416	0.160706	NaN	1	2.37678	0.129391	0.656646	2.37678	1	3.80416	1	NaN	13810900	0.692732	1.38768	NaN	2	2	2	1	1	1	264.13	0.0067088	2.3764	612260000	244760000	367500000	0	0	0	1	1	1	1	0	1
P70501	P70501	Rbm10	ENSRNOG00000008472	RNA-binding protein 10	0.485731	1.40002	-0.0627313	-0.01228	-0.200816	0.40749	0.521849	1.384	0.942876	0.2874	-0.0627313	0.244349	0.521849	0.129456	0.656646	0.771114	1	0.942876	0.669577	-0.0919423	2548300	0.533848	0.6465	0.0976032	19	18	2	35.3	34.5	2.7	94.387	0	180.73	6028300000	2882000000	3146300000	4	5	3	4	6	5	8	5	5
D3ZFK5	D3ZFK5	Spcs1	ENSRNOG00000018075		-0.00551799	-0.156391	NaN	1.64062	NaN	-0.266663	-0.0378218	-0.262286	-0.0809543	0.477547	1.64062	1	-0.262286	0.129589	0.656646	-0.188924	1	-0.0809543	1	1.64062	7008970	0.130876	0.106683	NaN	2	2	2	8	8	8	18.1	0	12.307	3492700000	1792500000	1700200000	1	1	2	2	2	1	1	2	1
D4A644	D4A644	Map7d1	ENSRNOG00000010237		0.151339	NaN	0.919363	2.14232	1.03604	1.33702	NaN	0.879392	0.151339	1	1.03604	0.0726284	1.10821	0.129623	0.656646	1.10821	1	0.151339	0.609869	1.36591	148018000	0.323592	NaN	0.674915	5	5	5	8.8	8.8	8.8	90.418	0	10.914	698960000	134740000	564210000	1	1	0	0	0	2	0	1	0
P04762	P04762	Cat	ENSRNOG00000008364	Catalase	-0.479285	-1.20672	0.366307	0.240104	-0.32803	-0.0405415	-0.232629	-0.286936	-0.843005	0.259312	0.240104	0.706284	-0.232629	0.129787	0.65678	-0.186702	1	-0.843005	0.984917	0.0927935	100022000	0.129458	0.514378	0.369866	17	17	17	43.5	43.5	43.5	59.756	0	149.52	7362000000	3416200000	3945800000	6	6	8	8	8	4	4	5	7
A0A140UHX3	A0A140UHX3	Ncapd3			0.620288	1.44477	-0.310701	0.609093	-0.0210569	0.0561673	0.398131	0.404794	1.03253	0.241829	-0.0210569	0.765936	0.398131	0.13066	0.660499	0.286364	1	1.03253	1	0.0924451	NaN	0.199384	0.582999	0.470284	8	8	8	6.2	6.2	6.2	168.78	0	22.398	308830000	137090000	171740000	1	2	1	0	1	1	0	2	0
Q56B11	Q56B11	Pelp1		Proline-, glutamic acid- and leucine-rich protein 1	0.330323	0.919293	-0.0105469	-0.0972857	-0.167496	0.597903	0.39144	NaN	0.624808	0.280394	-0.0972857	0.180555	0.494671	0.130975	0.661227	0.494671	1	0.624808	0.64808	-0.0917763	NaN	0.145992	0.416464	0.0786197	19	1	1	30.2	2.7	2.7	119.14	0	49.644	1497800000	659880000	837870000	14	14	13	11	13	12	11	13	9
D3Z9K8	D3Z9K8	Nsmce4a	ENSRNOG00000020452		-0.212121	NaN	NaN	-0.0812828	0.0889702	0.70673	0.182888	0.295855	-0.212121	1	0.0038437	0.971274	0.295855	0.131081	0.661227	0.395157	1	-0.212121	1	0.0038437	208135000	0.275678	NaN	0.120387	7	7	7	28.1	28.1	28.1	43.872	0	24.919	379000000	171440000	207560000	3	1	1	2	1	1	1	1	1
F1LUA1	F1LUA1;A0A0G2K051	Eea1	ENSRNOG00000021681		0.492865	-0.827913	0.198576	0.0783248	-0.0317819	0.579145	0.597842	0.0808065	-0.167524	0.841842	0.0783248	0.344264	0.579145	0.131639	0.663338	0.419265	1	-0.167524	0.734061	0.0817064	37144300	0.293262	0.933931	0.115216	30	30	30	30	30	30	161.1	0	255.12	4818900000	2405900000	2413100000	9	7	9	6	7	6	7	6	3
D3ZD11	D3ZD11	Spcs2	ENSRNOG00000018164		-0.330187	-1.14598	-0.00148027	-0.0478717	0.00296298	-0.292644	-0.213597	-0.761792	-0.738083	0.32141	-0.00148027	0.441866	-0.292644	0.13213	0.665111	-0.422678	1	-0.738083	0.80015	-0.015463	171032000	0.296329	0.576852	0.0281546	7	7	7	32.3	32.3	32.3	24.973	0	121.43	9981400000	4798600000	5182800000	3	3	3	4	4	4	4	4	4
O35889	O35889;F1LT10;O35889-2	Mllt4	ENSRNOG00000023753	Afadin	0.627926	1.28371	0.0252712	0.22919	0.110205	0.117211	0.192523	0.459819	0.955817	0.210382	0.110205	0.176168	0.192523	0.132377	0.665652	0.256518	1	0.955817	0.645792	0.121556	54957500	0.180046	0.463708	0.102432	32	32	32	28.5	28.5	28.5	207.68	0	151	6580300000	3067600000	3512600000	14	11	10	12	13	13	5	4	4
Q5M823	Q5M823	Nudcd2		NudC domain-containing protein 2	-0.288523	-1.05087	0.400101	0.399226	0.798516	-0.400435	NaN	-0.260639	-0.669696	0.329415	0.400101	0.0570319	-0.330537	0.13267	0.665957	-0.330537	1	-0.669696	0.609869	0.532614	NaN	0.0988502	0.53906	0.230278	6	6	6	58	58	58	17.674	0	36.128	1657000000	932800000	724240000	0	1	0	0	1	0	1	2	2
B2RZD2	B2RZD2	Tmem126b	ENSRNOG00000022732	Complex I assembly factor TMEM126B, mitochondrial	-0.348816	NaN	-0.0783582	-0.181376	-0.682233	-0.585922	-0.535708	-0.0762043	-0.348816	1	-0.181376	0.234309	-0.535708	0.132888	0.665957	-0.399278	1	-0.348816	0.668431	-0.313989	162508000	0.280915	NaN	0.323041	2	2	2	17.5	17.5	17.5	25.213	0	14.571	233230000	112530000	120710000	2	2	0	1	1	2	1	0	0
A0A0H2UHI2	A0A0H2UHI2;Q01986	Map2k1	ENSRNOG00000010176	Dual specificity mitogen-activated protein kinase kinase 1	-0.719735	-0.646624	0.296428	-0.3821	0.293651	-0.0951252	-0.729674	-0.620159	-0.683179	0.0340317	0.293651	0.787765	-0.620159	0.133093	0.665957	-0.481653	1	-0.683179	1	0.0693265	68841400	0.339192	0.0516972	0.390949	10	10	7	34.2	34.2	22.8	40.96	0	29.521	1583900000	956600000	627280000	2	1	1	2	2	2	1	1	1
P97887	P97887;O88777	Psen1	ENSRNOG00000002879;ENSRNOG00000009110	Presenilin-1;Presenilin-1 CTF subunit;Presenilin-1 CTF12;Presenilin-1 NTF subunit;Presenilin-2;Presenilin-2 CTF subunit;Presenilin-2 NTF subunit	NaN	-0.310182	3.78262	NaN	NaN	-0.743786	NaN	-0.483218	-0.310182	1	3.78262	1	-0.613502	0.133214	0.665957	-0.613502	1	-0.310182	1	3.78262	110924000	0.184249	NaN	NaN	3	3	3	10	10	10	52.789	0.00022482	5.2181	76573000	16626000	59947000	0	1	0	1	0	0	0	1	1
D3ZGE6	D3ZGE6;Q66HL2;A0A0G2JZ13;A0A1B0GWS4	Cttn	ENSRNOG00000047280;ENSRNOG00000050994	Src substrate cortactin	0.265977	0.32836	0.49393	0.420353	-0.0765838	0.147516	0.255036	0.597498	0.297169	0.0665777	0.420353	0.259452	0.255036	0.13331	0.665957	0.33335	1	0.297169	0.679903	0.279233	223309000	0.234991	0.0441117	0.310335	14	14	14	30.8	30.8	30.8	61.077	0	231.33	29749000000	14795000000	14954000000	4	5	2	5	3	5	5	6	4
M0R6R8	M0R6R8	Card14	ENSRNOG00000047367		0.374845	NaN	NaN	NaN	NaN	2.12786	1.3815	NaN	0.374845	1	NaN	1	1.75468	0.133406	0.665957	1.75468	1	0.374845	1	NaN	108050000	0.527756	NaN	NaN	3	3	3	4.1	4.1	4.1	113.19	0.0045072	2.6112	127210000	45098000	82113000	0	1	1	0	0	1	0	0	0
Q66HA8	Q66HA8	Hsph1	ENSRNOG00000000902	Heat shock protein 105 kDa	-0.0926219	-1.66013	-0.33656	0.101762	0.828175	-0.0921288	-0.0501342	-0.210148	-0.876378	0.464519	0.101762	0.619231	-0.0921288	0.13371	0.665957	-0.11747	1	-0.876378	0.923429	0.197792	8423550	0.0829624	1.1084	0.588276	33	32	32	55.5	53.8	53.8	96.417	0	323.31	19575000000	9402900000	10172000000	8	16	12	9	9	10	7	11	8
Q5M7U6	Q5M7U6	Actr2	ENSRNOG00000004959	Actin-related protein 2	-0.490089	-1.0336	0.238494	0.180352	-0.0434789	-0.106611	-0.478374	-0.222336	-0.761845	0.21813	0.180352	0.282754	-0.222336	0.133925	0.665957	-0.269107	1	-0.761845	0.697885	0.125122	104075000	0.190244	0.384321	0.148879	15	15	15	40.9	40.9	40.9	44.733	0	234.41	42832000000	22050000000	20783000000	4	8	6	9	8	9	10	7	10
B5DFI5	B5DFI5;Q6MFZ5;A0A0G2K4V2	Trim27	ENSRNOG00000000785	E3 ubiquitin-protein ligase TRIM39	-0.329703	0.013231	0.421371	0.276416	0.138159	-0.582632	-0.56056	-0.0746154	-0.158236	0.525534	0.276416	0.0763687	-0.56056	0.134053	0.665957	-0.405936	1	-0.158236	0.609869	0.278649	4530740	0.287144	0.242491	0.141619	12	12	12	31.8	31.8	31.8	58.554	0	21.726	541170000	262130000	279040000	1	2	1	3	0	1	4	1	2
B0BNE6	B0BNE6	Ndufs8	ENSRNOG00000017446		-0.129818	-0.54444	0.0411831	0.2875	-0.133564	-0.275901	-0.0834251	-0.0964926	-0.337129	0.350985	0.0411831	0.647603	-0.0964926	0.134206	0.665957	-0.151939	1	-0.337129	0.943047	0.0650398	226014000	0.107552	0.293182	0.211543	5	5	5	27.4	27.4	27.4	23.97	0	111.32	4747900000	2295600000	2452300000	4	3	2	4	3	4	3	4	1
G3V6K3	G3V6K3	Exosc7	ENSRNOG00000004413		0.2365	0.270028	0.0875586	-0.155058	-0.305586	0.447291	0.504326	0.0636492	0.253264	0.0420785	-0.155058	0.390979	0.447291	0.134303	0.665957	0.338422	1	0.253264	0.769315	-0.124362	131358000	0.239663	0.0237084	0.198362	9	9	9	44.7	44.7	44.7	31.862	0	51.763	8532100000	4132900000	4399200000	4	6	4	4	3	4	2	4	4
Q9Z0J5-2	Q9Z0J5-2;A0A0G2K6E2;F1M6X5;Q9Z0J5	Txnrd2	ENSRNOG00000001890	Thioredoxin reductase 2, mitochondrial	-0.0101344	NaN	-0.193585	0.715454	-0.279739	-0.322	-0.208394	NaN	-0.0101344	1	-0.193585	0.823541	-0.265197	0.134329	0.665957	-0.265197	1	-0.0101344	1	0.0807099	89762300	0.0803315	NaN	0.55139	5	4	4	15.7	12.6	12.6	53.238	0	7.6319	434470000	194580000	239890000	1	3	1	1	0	1	1	1	1
P63322	P63322	Rala	ENSRNOG00000013454	Ras-related protein Ral-A	0.109018	0.367191	0.20173	-0.310846	-0.354399	0.0855814	0.153062	0.354907	0.238105	0.316267	-0.310846	0.478094	0.153062	0.134341	0.665957	0.19785	1	0.238105	0.826319	-0.154505	47771000	0.140138	0.182556	0.309276	6	2	2	44.7	14.1	14.1	23.553	0	48.913	5346700000	2461500000	2885200000	5	4	5	5	3	4	4	4	3
M0R7R2	M0R7R2	Mtres1			-0.686058	NaN	-0.150929	-0.19808	0.448584	-0.32829	-0.50748	NaN	-0.686058	1	-0.150929	0.887951	-0.417885	0.134457	0.665957	-0.417885	1	-0.686058	1	0.0331915	NaN	0.126707	NaN	0.360512	3	3	3	17.4	17.4	17.4	29.264	0.00022361	5.0889	211940000	103310000	108630000	0	1	2	0	0	1	0	0	0
G3V8J0	G3V8J0;Q9JJS5	Sh3bp4	ENSRNOG00000019316	SH3 domain-binding protein 4	0.924316	1.46127	1.07416	-0.625264	-0.21357	0.108289	0.578663	0.311387	1.19279	0.140942	-0.21357	0.892264	0.311387	0.134531	0.665957	0.33278	1	1.19279	1	0.078443	95977000	0.235916	0.379681	0.886548	12	12	12	17	17	17	107.48	0	24.777	611090000	287900000	323200000	4	3	1	1	3	2	0	3	0
Q68FV1	Q68FV1	Tmem38b	ENSRNOG00000028063	Trimeric intracellular cation channel type B	NaN	NaN	NaN	NaN	NaN	-0.558347	-0.360768	NaN	NaN	1	NaN	1	-0.459557	0.1348	0.666599	-0.459557	1	NaN	1	NaN	74816800	0.139709	NaN	NaN	1	1	1	5.2	5.2	5.2	32.444	0.0085568	2.2884	23850000	12026000	11824000	0	1	0	1	0	0	0	0	0
D3ZB55	D3ZB55	Coa5	ENSRNOG00000018102		0.652238	-0.0633188	0.252173	0.467135	-0.251844	0.286815	0.684332	0.168899	0.29446	0.561609	0.252173	0.540662	0.286815	0.135062	0.667085	0.380015	1	0.29446	0.868489	0.155822	43716400	0.27006	0.505975	0.369047	2	2	2	35.1	35.1	35.1	8.3585	0.0067282	2.406	474960000	228260000	246710000	1	1	1	1	1	1	0	1	0
P05982	P05982	Nqo1	ENSRNOG00000012772	NAD(P)H dehydrogenase [quinone] 1	-0.77926	-2.03969	0.613887	0.660575	0.779713	-0.141205	-1.02268	-0.730195	-1.40948	0.267675	0.660575	0.00515832	-0.730195	0.135204	0.667085	-0.63136	1	-1.40948	0.609869	0.684725	49291900	0.448972	0.891262	0.0855099	9	9	9	39.1	39.1	39.1	30.946	0	265.38	39246000000	18066000000	21179000000	2	3	3	3	3	2	5	4	5
P13803	P13803	Etfa	ENSRNOG00000015233	Electron transfer flavoprotein subunit alpha, mitochondrial	-0.0504059	-0.651837	-0.109281	-0.0419573	-0.130844	-0.0861724	-0.0363487	-0.17608	-0.351122	0.450869	-0.109281	0.0723622	-0.0861724	0.135318	0.667085	-0.0995337	1	-0.351122	0.609869	-0.0940275	58608400	0.0708174	0.425276	0.0463651	13	13	13	60.1	60.1	60.1	34.951	0	323.31	85342000000	39687000000	45655000000	10	10	11	10	10	11	11	11	12
Q00238	Q00238	Icam1	ENSRNOG00000020679	Intercellular adhesion molecule 1	-0.287902	-0.116638	0.34096	-0.499189	-0.133411	-0.0645916	-0.333985	-0.172409	-0.20227	0.254952	-0.133411	0.728011	-0.172409	0.135593	0.667751	-0.190329	1	-0.20227	0.998851	-0.0972135	22092100	0.135588	0.121102	0.421243	10	10	10	18.9	18.9	18.9	60.141	0	73.031	10491000000	4862700000	5628400000	5	4	4	4	5	6	3	5	4
G3V7R1	G3V7R1;O08587	Nup50	ENSRNOG00000013423	Nuclear pore complex protein Nup50	0.829399	0.809487	0.0253193	-0.0865333	-0.355268	0.524646	0.848245	0.132335	0.819443	0.00773442	-0.0865333	0.343967	0.524646	0.136247	0.670279	0.501742	1	0.819443	0.733964	-0.138827	125551000	0.358504	0.01408	0.195609	20	20	20	64.5	64.5	64.5	49.748	0	323.31	15910000000	7938900000	7970900000	9	6	7	4	5	9	3	8	5
Q63400	Q63400	Cldn3	ENSRNOG00000046007	Claudin-3	0.0411028	-0.00652125	0.0816161	NaN	-0.449218	0.159758	0.102591	NaN	0.0172908	0.600169	-0.183801	0.614416	0.131175	0.136588	0.671265	0.131175	1	0.0172908	0.921278	-0.183801	23849600	0.0404235	0.0336753	0.375356	3	3	3	15.1	15.1	15.1	23.314	0.00044514	4.953	927600000	448220000	479380000	0	1	0	1	0	1	0	0	1
Q6AYS3	Q6AYS3	Ctsa	ENSRNOG00000015857		-0.473328	-1.27206	0.584267	0.814301	0.194781	-0.685265	-0.178773	-0.267891	-0.872696	0.273223	0.584267	0.0989802	-0.267891	0.136897	0.671398	-0.37731	1	-0.872696	0.627753	0.531116	167484000	0.270394	0.564791	0.313162	10	10	10	25	25	25	51.215	0	151.12	9652500000	4724100000	4928400000	3	6	5	4	7	7	6	5	4
G3V8Q1	G3V8Q1;A0A0U1RRT4;A0A0U1RRX3	Cope	ENSRNOG00000020178		0.204201	-0.814519	-0.0848642	0.450126	0.238111	0.290487	0.239509	0.0350708	-0.305159	0.656379	0.238111	0.325213	0.239509	0.137209	0.671398	0.188355	1	-0.305159	0.721837	0.201124	20714900	0.135173	0.720344	0.269406	13	13	13	64.6	64.6	64.6	34.653	0	246.81	6054900000	2786400000	3268500000	5	6	6	4	5	6	4	4	3
D3ZCG9	D3ZCG9;D3ZQM3	Itga3	ENSRNOG00000004276		-0.946095	0.0490664	0.310763	-0.0501304	-0.52495	-0.302212	-0.502702	-0.0795102	-0.448514	0.532987	-0.0501304	0.750686	-0.302212	0.137338	0.671398	-0.294808	1	-0.448514	1	-0.0881059	82668000	0.211693	0.703685	0.419149	22	22	22	36	36	36	117.01	0	320.97	61266000000	29128000000	32138000000	15	13	12	11	12	12	11	9	9
P63088	P63088;P63088-2;A0A0G2JVK2	Ppp1cc	ENSRNOG00000001269	Serine/threonine-protein phosphatase PP1-gamma catalytic subunit	0.517779	0.113804	0.680332	0.418691	0.0204548	0.38716	0.601792	0.0881446	0.315792	0.362265	0.418691	0.191184	0.38716	0.13748	0.671398	0.359032	1	0.315792	0.650585	0.37316	41744500	0.257976	0.285653	0.332287	18	5	5	63.5	17.6	17.6	36.983	0	99.886	4167500000	1893900000	2273600000	14	12	11	9	14	13	10	10	12
B2RZ12	B2RZ12	Imp3	ENSRNOG00000017460		0.113964	0.464615	-0.187455	-0.588132	-0.475358	0.0669612	0.121248	0.285246	0.28929	0.346869	-0.475358	0.0729954	0.121248	0.137961	0.671398	0.157818	1	0.28929	0.609869	-0.416982	60176500	0.113644	0.247948	0.206619	7	7	7	43.5	43.5	43.5	21.66	0	47.573	7867500000	3988000000	3879500000	5	4	5	5	3	3	4	5	4
D3ZSP1	D3ZSP1;D4A8M5;F7ETL6	Snrpel1	ENSRNOG00000017086;ENSRNOG00000031127;ENSRNOG00000034206		0.233208	0.520113	-0.340681	-0.0798968	-0.0861802	0.154904	0.0393408	0.254699	0.37666	0.231662	-0.0861802	0.188144	0.154904	0.13799	0.671398	0.149648	1	0.37666	0.64896	-0.168919	142465000	0.107775	0.202873	0.148783	4	4	4	65.2	65.2	65.2	10.76	0	83.75	27434000000	13107000000	14326000000	3	3	3	2	3	2	1	2	2
A0A0G2JSS1	A0A0G2JSS1;Q9Z1Z6	Ilkap		Integrin-linked kinase-associated serine/threonine phosphatase 2C	NaN	NaN	-1.92774	NaN	0.437334	NaN	0.442121	0.691981	NaN	1	-0.745204	0.642022	0.567051	0.138052	0.671398	0.567051	1	NaN	0.93957	-0.745204	NaN	0.176678	NaN	1.67236	4	4	4	11.7	11.7	11.7	42.718	0	10.178	184380000	145340000	39044000	0	0	0	1	0	0	1	0	0
Q9Z1N4	Q9Z1N4;A0A0G2K0V3	Bpnt1	ENSRNOG00000002378	3'(2'),5'-bisphosphate nucleotidase 1	-0.66974	0.494876	NaN	0.85824	0.634862	-0.96016	NaN	-1.50324	-0.0874318	0.905122	0.746551	0.0945414	-1.2317	0.13814	0.671398	-1.2317	1	-0.0874318	0.61717	0.746551	107941000	0.384017	0.823508	0.157952	8	8	8	40.3	40.3	40.3	33.174	0	36.099	1046000000	553470000	492570000	0	1	0	0	0	1	1	1	0
A0A0G2K9A2	A0A0G2K9A2;P85970;A0A0G2K905;A0A0G2K2J1;A0A0G2K1V8	Arpc2	ENSRNOG00000014289	Actin-related protein 2/3 complex subunit 2	-0.558611	-0.897976	0.286848	0.201552	-0.0303968	-0.197334	-0.436789	-0.0952725	-0.728294	0.145724	0.201552	0.248556	-0.197334	0.138246	0.671398	-0.243132	1	-0.728294	0.672969	0.152668	81285100	0.175304	0.239968	0.164175	18	18	18	70.3	70.3	70.3	34.347	0	163.8	46078000000	22148000000	23930000000	10	10	8	8	8	7	7	9	10
A1A5S1	A1A5S1	Prpf6	ENSRNOG00000015600	Pre-mRNA-processing factor 6	0.0261551	0.183471	-0.0548666	-0.334781	-0.228221	0.189953	0.0271256	0.123451	0.104813	0.409853	-0.228221	0.127527	0.123451	0.138311	0.671398	0.11351	1	0.104813	0.638884	-0.205956	180808000	0.0818676	0.111239	0.141279	41	41	41	52.8	52.8	52.8	106.76	0	323.31	47360000000	22503000000	24856000000	14	20	19	18	17	16	17	17	15
Q9JHL4-3	Q9JHL4-3;Q9JHL4-2;Q9JHL4;Q9JHL4-4	Dbnl	ENSRNOG00000012378	Drebrin-like protein	-0.115741	-1.13426	-0.178673	0.129579	0.568392	-0.330738	-0.158723	-0.73062	-0.624999	0.435263	0.129579	0.508288	-0.330738	0.138383	0.671398	-0.406694	1	-0.624999	0.84691	0.173099	86721100	0.293417	0.720199	0.375429	16	16	16	53.9	53.9	53.9	48.254	0	204.57	6902000000	3566800000	3335300000	4	3	5	5	5	5	1	3	1
A0A0G2K2F8	A0A0G2K2F8;A0A0G2JT65	Zfp106			0.784169	1.53895	0.316249	-0.155704	-0.764028	0.716131	1.05054	0.142609	1.16156	0.199988	-0.155704	0.585916	0.716131	0.138393	0.671398	0.636427	1	1.16156	0.903973	-0.201161	NaN	0.459183	0.53371	0.541571	7	7	7	4.8	4.8	4.8	208.33	0	28.25	345020000	155350000	189670000	1	1	1	1	0	1	3	1	3
F1LSL2	F1LSL2;P52590	Nup107	ENSRNOG00000006541	Nuclear pore complex protein Nup107	0.419497	-0.282858	0.136712	-0.284774	-0.290535	0.337164	0.368196	0.0422115	0.0683195	0.877677	-0.284774	0.409984	0.337164	0.138551	0.671398	0.249191	1	0.0683195	0.77791	-0.146199	60781700	0.179919	0.49664	0.245025	36	36	36	56.9	56.9	56.9	106.88	0	323.31	13939000000	6629500000	7309100000	11	12	10	12	12	11	8	13	11
D4A2B0	D4A2B0;A0A0G2JXM5	Poldip3	ENSRNOG00000022877		1.2503	2.85634	-0.130258	-0.541075	-0.481453	1.18484	0.871414	3.20834	2.05332	0.237329	-0.481453	0.0955631	1.18484	0.138801	0.671398	1.75486	1	2.05332	0.619212	-0.384262	123975000	1.26847	1.13564	0.221985	14	14	14	48.6	48.6	48.6	46.321	0	182.79	11104000000	4794000000	6310400000	10	7	8	7	5	8	3	5	5
Q8CGU6	Q8CGU6;B3DM90	Ncstn	ENSRNOG00000005355	Nicastrin	0.14667	0.171431	0.299633	-0.174172	-0.13768	-0.118929	-0.279089	-0.0646221	0.15905	0.0494555	-0.13768	0.981082	-0.118929	0.138866	0.671398	-0.154214	1	0.15905	1	-0.0040732	94974000	0.111502	0.0175089	0.263649	11	11	11	21.9	21.9	21.9	78.399	0	100.15	4021600000	1970200000	2051500000	6	6	3	2	3	3	1	3	2
F1LM55	F1LM55	Ccar2	ENSRNOG00000018295		0.750179	0.309584	-0.059079	-0.557367	-0.401359	1.04876	0.977707	0.118871	0.529882	0.250833	-0.401359	0.14759	0.977707	0.139093	0.671398	0.715112	1	0.529882	0.641577	-0.339268	55545000	0.517581	0.311548	0.254881	37	37	37	56.5	56.5	56.5	102.79	0	323.31	50158000000	23591000000	26567000000	17	18	17	14	16	12	20	21	18
Q6AYT7	Q6AYT7	Abhd12	ENSRNOG00000036934	Monoacylglycerol lipase ABHD12	-0.0512598	-0.53655	0.215936	0.117291	-0.046618	-0.0771539	-0.156847	-0.351971	-0.293905	0.439364	0.117291	0.338416	-0.156847	0.139125	0.671398	-0.195324	1	-0.293905	0.729701	0.0955364	152989000	0.141391	0.343152	0.132622	15	15	15	54	54	54	45.295	0	82.958	6921100000	3319900000	3601200000	6	5	5	4	4	2	5	5	5
X1WI37	X1WI37;P62703;A0A0H2UHX3;D3ZX01	Rps4x	ENSRNOG00000003201;ENSRNOG00000029574;ENSRNOG00000031041	40S ribosomal protein S4;40S ribosomal protein S4, X isoform	-0.513948	-1.54979	-0.27667	0.0648165	0.173788	-0.400932	-0.17844	-0.0879907	-1.03187	0.296147	0.0648165	0.93402	-0.17844	0.139148	0.671398	-0.222454	1	-1.03187	1	-0.0126886	72916100	0.161047	0.732453	0.235017	15	15	15	51.1	51.1	51.1	29.466	0	323.31	84867000000	43780000000	41087000000	9	9	9	10	10	10	5	7	6
Q9WUD9	Q9WUD9;Q9WUD9-2;Q5FVG7	Src	ENSRNOG00000009495;ENSRNOG00000013003	Non-specific protein-tyrosine kinase;Proto-oncogene tyrosine-protein kinase Src	0.658965	-0.190767	NaN	NaN	-0.138441	0.324005	0.735684	0.163112	0.234099	0.679394	-0.138441	1	0.324005	0.139309	0.671499	0.407601	1	0.234099	1	-0.138441	169273000	0.295298	0.600851	NaN	12	5	5	26.7	14.4	14.4	59.972	0	17.501	939550000	409680000	529860000	5	4	6	5	5	4	5	5	5
E9PT22	E9PT22	Inf2	ENSRNOG00000028650		0.800506	-0.707081	0.196912	0.103111	-0.0141502	1.08779	1.03465	0.121233	0.0467123	0.960599	0.103111	0.258957	1.03465	0.139936	0.673838	0.74789	1	0.0467123	0.679903	0.0952909	146172000	0.543351	1.06602	0.105748	16	16	16	17.8	17.8	17.8	136.46	0	47.399	2762200000	1212800000	1549300000	5	2	1	2	3	3	2	6	4
A0A0G2K6P4	A0A0G2K6P4;P63159;D3ZXR5;D3ZLG3;D4A6A9;D3ZC69;M0R7R5;D3ZIU9;F1LNG6;D3ZGW6;F1M6B2	Hmg1l1	ENSRNOG00000029813;ENSRNOG00000032420;ENSRNOG00000032550;ENSRNOG00000034130;ENSRNOG00000038033;ENSRNOG00000038437;ENSRNOG00000038478;ENSRNOG00000038953;ENSRNOG00000048094;ENSRNOG00000048471;ENSRNOG00000048544	High mobility group protein B1	-0.848891	-2.95496	0.119989	0.656369	0.533817	-0.252323	-0.772539	-0.234958	-1.90192	0.321909	0.533817	0.114774	-0.252323	0.140223	0.67394	-0.41994	1	-1.90192	0.638884	0.436725	60285700	0.305483	1.48921	0.281062	10	10	9	35.7	35.7	30	24.677	0	224.11	52886000000	26862000000	26023000000	8	8	8	9	8	8	4	5	4
Q9JLA3	Q9JLA3	Uggt1	ENSRNOG00000014901	UDP-glucose:glycoprotein glucosyltransferase 1	-0.0562047	-0.573918	0.0660513	0.0617586	-0.297254	0.128045	0.0368493	0.0439583	-0.315061	0.437853	0.0617586	0.685139	0.0439583	0.140584	0.67394	0.0696175	1	-0.315061	0.970461	-0.0564813	42350100	0.0507243	0.366079	0.208526	57	57	57	52.7	52.7	52.7	176.43	0	323.31	45623000000	21779000000	23844000000	27	26	27	27	28	19	18	20	19
F1M0N7	F1M0N7;A0A0G2JXG7	Lrrc16a	ENSRNOG00000016576		1.1185	-2.01584	0.370276	1.27716	NaN	0.457405	0.0498057	0.40815	-0.448669	0.822489	0.823716	0.320355	0.40815	0.140747	0.67394	0.30512	1	-0.448669	0.720403	0.823716	44916800	0.222476	2.21632	0.641261	14	14	14	14.3	14.3	14.3	152.16	0	30.697	1401100000	782380000	618740000	5	4	2	5	4	3	1	2	1
Q5PQV5	Q5PQV5	Tpbg	ENSRNOG00000010694	Trophoblast glycoprotein	0.160408	-0.137687	0.207268	NaN	0.081067	-0.0810945	-0.0359727	-0.0175121	0.0113608	0.951569	0.144168	0.26265	-0.0359727	0.140749	0.67394	-0.0448598	1	0.0113608	0.681918	0.144168	93006500	0.0327096	0.210785	0.0892377	5	5	5	15.3	15.3	15.3	46.508	0	32.468	710930000	343420000	367510000	4	4	2	3	2	1	2	3	3
P84586	P84586;A0A0A0MXW9;A0A0G2K8K9;D4AE41;W8CC80	Rbmxl	ENSRNOG00000012138;ENSRNOG00000028858	RNA binding motif protein, X-linked-like-1;RNA-binding motif protein, X chromosome retrogene-like;RNA-binding motif protein, X chromosome retrogene-like, N-terminally processed	0.282312	0.472018	0.060459	-0.467461	-0.438799	0.544575	0.0682983	0.384046	0.377165	0.15685	-0.438799	0.241719	0.384046	0.140764	0.67394	0.332306	1	0.377165	0.669577	-0.281934	42875000	0.242317	0.134142	0.296867	13	13	3	35.3	35.3	10.6	42.203	0	323.31	101790000000	47674000000	54115000000	6	6	6	7	6	7	9	10	8
Q5BJU0	Q5BJU0;A0A0G2K508	Rras2	ENSRNOG00000012258		-0.741037	0.0306208	0.0119281	-0.328163	-0.408252	-0.375733	-0.518351	-0.0632384	-0.355208	0.526291	-0.328163	0.201644	-0.375733	0.140849	0.67394	-0.319108	1	-0.355208	0.656891	-0.241496	185908000	0.23278	0.545645	0.223095	11	11	9	48.5	48.5	35.3	23.399	0	135.38	15238000000	7693000000	7545400000	3	6	5	5	5	7	5	5	6
B0BMW8	B0BMW8;G3V8J7	Rce1	ENSRNOG00000019468	CAAX prenyl protease 2	NaN	-0.30602	-0.821101	NaN	NaN	-0.442987	-0.280177	NaN	-0.30602	1	-0.821101	1	-0.361582	0.140975	0.67394	-0.361582	1	-0.30602	1	-0.821101	226727000	0.115124	NaN	NaN	1	1	1	4.5	4.5	4.5	33.646	0.0048809	2.5812	35740000	16989000	18751000	0	1	0	1	0	0	0	0	0
O55158	O55158	Tspan8	ENSRNOG00000004411	Tetraspanin	-0.0076417	0.243013	0.360665	-0.22297	-0.240725	0.0301902	0.0639802	0.142476	0.117686	0.520012	-0.22297	0.878003	0.0639802	0.141102	0.67394	0.0788822	1	0.117686	1	-0.0343432	58821700	0.0576072	0.17724	0.342202	7	7	7	31.9	31.9	31.9	25.545	0	323.31	49934000000	24139000000	25796000000	6	3	4	5	5	5	5	5	6
Q920D2	Q920D2	Dhfr	ENSRNOG00000013521	Dihydrofolate reductase	-1.2697	-1.89169	0.0815718	0.416619	0.671212	-0.387543	-1.08079	-0.29466	-1.5807	0.123674	0.416619	0.149891	-0.387543	0.141316	0.67394	-0.587664	1	-1.5807	0.64184	0.389801	41137900	0.429576	0.439818	0.295733	10	10	9	64.2	64.2	63.6	21.638	0	45.415	6450100000	3205200000	3244800000	1	1	1	2	1	2	5	3	4
A0A0G2K437	A0A0G2K437	Amfr			NaN	-0.69633	NaN	NaN	NaN	0.448161	1.07875	0.248413	-0.69633	1	NaN	1	0.448161	0.141741	0.67394	0.591774	1	-0.69633	1	NaN	NaN	0.433396	NaN	NaN	4	4	4	7.9	7.9	7.9	70.7	0	6.0852	103870000	39554000	64318000	2	0	0	1	0	0	1	2	0
Q5XIE1	Q5XIE1	Them6	ENSRNOG00000005929	Protein THEM6	-0.119595	-0.635031	0.401595	0.0520784	-0.0753598	-0.554802	-0.082283	-0.331047	-0.377313	0.381493	0.0520784	0.46974	-0.331047	0.141767	0.67394	-0.322711	1	-0.377313	0.8184	0.126105	115862000	0.23637	0.364468	0.246944	10	10	10	52.2	52.2	52.2	23.747	0	54.846	4897200000	2149500000	2747700000	2	2	5	3	4	7	2	4	2
Q5BJT0	Q5BJT0	Arglu1	ENSRNOG00000024142	Arginine and glutamate-rich protein 1	0.362607	0.0233263	NaN	NaN	0.204892	0.51347	0.0715233	0.321945	0.192967	0.459103	0.204892	1	0.321945	0.141968	0.67394	0.302313	1	0.192967	1	0.204892	86014400	0.221626	0.239908	NaN	4	4	4	14	14	14	32.887	0.00064767	4.2822	1703200000	802940000	900230000	1	1	1	1	1	2	1	1	0
Q4QRB0	Q4QRB0;A0A0G2JW36;P18645	Gale		UDP-glucose 4-epimerase	2.18479	-3.5949	0.224928	0.509164	0.630635	NaN	-0.723401	-0.455753	-0.705054	0.847656	0.509164	0.0632812	-0.589577	0.142094	0.67394	-0.589577	1	-0.705054	0.609869	0.454909	NaN	0.189256	4.08685	0.208224	18	18	18	82.8	82.8	82.8	38.353	0	284.09	6991500000	3463600000	3527900000	0	0	2	3	0	2	3	3	3
P51577	P51577	P2rx4	ENSRNOG00000001300	P2X purinoceptor 4	NaN	NaN	0.0985303	0.43482	-0.201736	-0.635402	-1.0088	NaN	NaN	1	0.0985303	0.60876	-0.8221	0.142164	0.67394	-0.8221	1	NaN	0.917641	0.110538	41196800	0.264031	NaN	0.318448	1	1	1	6.7	6.7	6.7	43.501	0	78.911	1187700000	480140000	707550000	1	1	1	0	0	0	0	0	0
Q9JHW0	Q9JHW0;A0A0G2JUN8	Psmb7	ENSRNOG00000011732	Proteasome subunit beta type-7	-0.104199	-0.456442	0.136894	0.0383767	0.416492	-0.104388	-0.09526	-0.320072	-0.280321	0.357118	0.136894	0.22367	-0.104388	0.142395	0.67394	-0.17324	1	-0.280321	0.667493	0.197254	28115600	0.127242	0.249074	0.196151	13	13	13	75.8	75.8	75.8	29.927	0	190.99	5804500000	2609600000	3194900000	2	1	1	1	2	1	4	3	2
F1M853	F1M853	Rrbp1	ENSRNOG00000005958		0.59668	-0.628787	0.0538443	0.0977174	-0.123522	0.515424	0.63688	0.068949	-0.0160532	0.983325	0.0538443	0.902739	0.515424	0.142446	0.67394	0.407084	1	-0.0160532	1	0.00934671	144493000	0.299064	0.866536	0.11714	45	45	45	36.1	36.1	36.1	157.5	0	323.31	78401000000	33144000000	45257000000	25	25	23	27	23	24	21	23	18
A0JPL2	A0JPL2;P97633;D3ZRE3;P97633-2	Csnk1a1	ENSRNOG00000017106	Casein kinase I isoform alpha	-0.104641	-0.863263	0.318587	0.0958384	-0.0448383	-0.217531	-0.0595198	-0.0768	-0.483952	0.423206	0.0958384	0.364366	-0.0768	0.142496	0.67394	-0.11795	1	-0.483952	0.748327	0.123196	56116400	0.0866713	0.536427	0.183251	13	13	13	47.2	47.2	47.2	38.914	0	80.976	8624900000	4133800000	4491100000	6	6	4	5	6	6	3	5	4
Q5RKI5	Q5RKI5	Flii	ENSRNOG00000004159		-0.402365	-0.710273	-0.182349	0.377655	0.330501	-0.137207	-0.383034	-0.102749	-0.556319	0.171875	0.330501	0.431458	-0.137207	0.142877	0.67394	-0.207663	1	-0.556319	0.790978	0.175269	46728500	0.15285	0.217724	0.310603	31	31	31	37.1	37.1	37.1	144.86	0	162.62	9957600000	5712100000	4245400000	10	10	8	10	13	11	9	9	6
A0A0G2K016	A0A0G2K016;Q5U2W0	Sun1	ENSRNOG00000001299		-0.189267	-0.249062	0.164782	-0.326364	-0.448303	-0.0321999	-0.261218	-0.179593	-0.219164	0.0863121	-0.326364	0.391308	-0.179593	0.142916	0.67394	-0.15767	1	-0.219164	0.769315	-0.203295	19476300	0.116072	0.0422814	0.324543	33	33	33	50.7	50.7	50.7	102.4	0	294.85	26704000000	12778000000	13925000000	15	15	17	14	14	19	11	15	10
P13383	P13383;Q5U328	Ncl	ENSRNOG00000018273	Nucleolin	-0.0993339	0.0140526	-0.313657	-0.706574	-0.42178	0.0270468	0.158326	0.0830431	-0.0426407	0.589468	-0.42178	0.0546125	0.0830431	0.142946	0.67394	0.0894721	1	-0.0426407	0.609869	-0.48067	93097900	0.0658755	0.0801764	0.20297	30	30	30	40.3	40.3	40.3	77.146	0	323.31	667280000000	328540000000	338750000000	22	22	23	23	23	22	22	25	22
D4A2F1	D4A2F1;P25304-3;F1LPF2;P25304-4;P25304-2;P25304-5;P25304-6;P25304	Agrn	ENSRNOG00000020205	Agrin;Agrin C-terminal 110 kDa subunit;Agrin C-terminal 22 kDa fragment;Agrin C-terminal 90 kDa fragment;Agrin N-terminal 110 kDa subunit	0.193083	-0.286232	-0.0396963	0.35321	0.251446	0.124187	0.283011	0.0601904	-0.0465745	0.877804	0.251446	0.250821	0.124187	0.142979	0.67394	0.155796	1	-0.0465745	0.672969	0.18832	177064000	0.114724	0.338927	0.203918	7	7	7	7.9	7.9	7.9	206.59	0	33.094	512730000	235370000	277360000	3	2	1	1	1	2	2	1	2
F1MA98	F1MA98	Tpr	ENSRNOG00000002394	Nucleoprotein TPR	0.515158	0.110083	-0.0196492	-0.392571	-0.415255	0.606954	0.538819	0.0624307	0.312621	0.365978	-0.392571	0.164467	0.538819	0.143064	0.67394	0.402734	1	0.312621	0.64184	-0.275825	72576500	0.296674	0.286432	0.222144	73	73	73	36.9	36.9	36.9	267.3	0	323.31	75764000000	35379000000	40385000000	38	38	35	33	36	30	30	19	35
A0A0G2K2L8	A0A0G2K2L8;Q62915;A0A0G2JVI6;D4A8M2;A0A0G2K8F4	Cask	ENSRNOG00000003054	Peripheral plasma membrane protein CASK	0.266632	0.285989	0.123894	-0.14998	-0.0227477	0.0644992	0.129686	0.300161	0.276311	0.0222903	-0.0227477	0.856049	0.129686	0.143629	0.675193	0.164782	1	0.276311	1	-0.016278	10241000	0.121688	0.0136875	0.137051	11	11	11	19.3	19.3	19.3	103.21	0	48.246	3993700000	1819300000	2174400000	5	7	3	5	4	6	1	2	1
B0BNI2	B0BNI2;D3ZMQ7	Wdr74	ENSRNOG00000042878		-0.214441	0.249069	-0.308651	-0.886396	-0.618283	0.0998609	0.0646292	0.261257	0.0173141	0.952527	-0.618283	0.0685195	0.0998609	0.14372	0.675193	0.141916	1	0.0173141	0.609869	-0.604443	231871000	0.104843	0.327752	0.289121	13	13	13	51.4	51.4	51.4	42.736	0	197.35	9550100000	4695400000	4854700000	6	8	9	7	7	8	7	7	4
Q6AYU1	Q6AYU1	Morf4l1	ENSRNOG00000014410	Mortality factor 4-like protein 1	0.277365	-0.188992	0.121162	0.717907	0.128113	0.379234	0.039623	0.307477	0.0441864	0.880777	0.128113	0.244631	0.307477	0.143883	0.675193	0.242111	1	0.0441864	0.669577	0.322394	96974700	0.178993	0.329764	0.342542	11	11	10	52.3	52.3	48.3	37.2	0	39.291	1880400000	847990000	1032400000	4	4	2	2	5	4	5	4	4
Q5PQZ9	Q5PQZ9	Ndufc2	ENSRNOG00000012383	NADH dehydrogenase [ubiquinone] 1 subunit C2	-0.149748	-0.622037	0.0458945	0.101474	-0.0663991	-0.360551	-0.0370952	-0.300425	-0.385893	0.349603	0.0458945	0.639463	-0.300425	0.143896	0.675193	-0.23269	1	-0.385893	0.937774	0.0269899	168576000	0.172037	0.333959	0.0855184	6	6	6	41.7	41.7	41.7	14.359	0	13.082	2548400000	1180000000	1368400000	3	3	2	3	3	2	2	3	1
A0A0G2JSM1	A0A0G2JSM1;A0A0G2K953;Q8VHV8	Vimp		Selenoprotein S	-1.18988	-0.232159	-0.49562	-0.277931	-0.185984	-0.42878	-0.42223	-0.0427688	-0.711018	0.377329	-0.277931	0.0734318	-0.42223	0.144652	0.675944	-0.297926	1	-0.711018	0.609869	-0.319845	NaN	0.220997	0.67721	0.159017	3	3	3	19.1	19.1	19.1	21.115	0	9.6006	519480000	269480000	250000000	2	1	2	0	0	1	1	0	1
Q5FVI6	Q5FVI6;A0A0G2JZN3;Q6AYE4-2;M0RBN8;Q6AYE4	Atp6v1c1	ENSRNOG00000004846;ENSRNOG00000050553	V-type proton ATPase subunit C 1;V-type proton ATPase subunit C 2	-0.208804	-1.71778	-0.0565145	0.231087	0.0516418	-0.312205	-0.0573123	-0.467886	-0.963291	0.422994	0.0516418	0.463498	-0.312205	0.144893	0.675944	-0.279134	1	-0.963291	0.814839	0.0754047	65421900	0.207275	1.067	0.145266	12	12	12	42.4	42.4	42.4	43.9	0	74.715	3688800000	1292500000	2396300000	1	4	3	2	2	3	4	3	3
F1LVV3	F1LVV3	Ranbp9	ENSRNOG00000017951		NaN	-0.491246	0.113087	-0.341067	0.157016	-0.295836	-0.518804	-1.28785	-0.491246	1	0.113087	0.895519	-0.518804	0.144913	0.675944	-0.700831	1	-0.491246	1	-0.0236545	25970500	0.520456	NaN	0.275763	9	7	7	21.4	16.5	16.5	74.201	0	29.269	516690000	279530000	237160000	0	3	0	2	0	1	0	1	2
Q9ES71	Q9ES71	Gnpat	ENSRNOG00000019205	Dihydroxyacetone phosphate acyltransferase	-0.0098502	-1.09337	0.314344	0.472152	0.184084	-0.274167	-0.0267383	-0.257987	-0.551608	0.494265	0.314344	0.0603338	-0.257987	0.145028	0.675944	-0.186297	1	-0.551608	0.609869	0.323527	68327900	0.138419	0.766161	0.144253	26	26	26	44.2	44.2	44.2	77.075	0	110.34	6496200000	3050300000	3445900000	9	10	7	5	8	11	4	4	1
D4A994	D4A994	Emc1	ENSRNOG00000018097		-0.149735	-0.55849	0.0294016	-0.0898952	-0.174327	-0.381211	-0.0887722	-0.151395	-0.354113	0.333239	-0.0898952	0.31643	-0.151395	0.145155	0.675944	-0.207126	1	-0.354113	0.720403	-0.0782736	161561000	0.153979	0.289033	0.10236	26	26	26	36.5	36.5	36.5	111.18	0	157.14	15429000000	7422400000	8006300000	12	16	13	8	9	10	7	12	11
A0A0G2K226	A0A0G2K226	Nudcd3			-0.820284	-1.02974	NaN	-0.795909	0.00967481	-1.14286	-1.01116	-0.111382	-0.925009	0.0717699	-0.393117	0.507738	-1.01116	0.145158	0.675944	-0.755134	1	-0.925009	0.84691	-0.393117	NaN	0.561382	0.148105	0.569634	6	6	6	46.4	46.4	46.4	19.952	0	40.732	899740000	500680000	399070000	0	1	3	1	1	1	1	3	2
M0R567	M0R567;Q5EIC4	Irf2bpl	ENSRNOG00000011026	Interferon regulatory factor 2-binding protein-like	0.650029	0.482848	-0.425231	-0.106032	0.77327	0.614097	0.9855	NaN	0.566439	0.093274	-0.106032	0.842801	0.799799	0.14524	0.675944	0.799799	1	0.566439	1	0.080669	120194000	0.262622	0.118215	0.62068	6	5	5	11.3	9.2	9.2	81.367	0	9.2039	599440000	237730000	361700000	3	1	2	1	0	2	0	0	0
Q8CFN2	Q8CFN2;Q8CFN2-2;A0A0G2JSM8;Q9JJL4;Q5RJS2	Cdc42	ENSRNOG00000013536;ENSRNOG00000015415;ENSRNOG00000021919	Cell division control protein 42 homolog;Rho-related GTP-binding protein RhoQ	-0.0763389	-0.438316	0.189902	0.000446998	0.087009	-0.215952	-0.183732	-0.0211783	-0.257327	0.390225	0.087009	0.233398	-0.183732	0.1454	0.675944	-0.140288	1	-0.257327	0.668431	0.0924526	107703000	0.104402	0.255956	0.0948446	7	6	6	52.9	47.1	47.1	21.258	0	135.41	26038000000	13273000000	12766000000	4	5	3	4	3	2	3	3	3
Q6IFW7	Q6IFW7	Krt28	ENSRNOG00000011846		NaN	-3.27174	NaN	NaN	NaN	NaN	-3.6212	-5.81864	-3.27174	1	NaN	1	-4.71992	0.145601	0.675944	-4.71992	1	-3.27174	1	NaN	87071800	1.55382	NaN	NaN	3	1	1	6	2.3	2.3	41.325	0	45.555	1558800000	1496200000	62600000	1	0	2	0	0	0	1	2	2
Q99ND8	Q99ND8;A0A0G2K7C6;P35815;Q642F2;P35815-2	Ppm1b	ENSRNOG00000030667	Protein phosphatase 1B	-0.395568	-1.90463	-0.190541	0.158304	0.222895	NaN	-0.501571	-0.312141	-1.1501	0.369635	0.158304	0.669678	-0.406856	0.14561	0.675944	-0.406856	1	-1.1501	0.961982	0.0635526	8152850	0.133947	1.06707	0.222409	13	13	10	41.1	41.1	34.4	51.009	0	88.723	5167700000	2521600000	2646100000	0	0	2	1	0	4	2	2	3
A0A0G2JY75	A0A0G2JY75;A0A0G2K679	Gtf3c2			0.0163537	0.673538	-0.10199	-0.87044	-0.53869	0.0964056	0.851544	0.601185	0.344946	0.484546	-0.53869	0.151908	0.601185	0.145614	0.675944	0.516379	1	0.344946	0.64184	-0.503707	NaN	0.384646	0.4647	0.385418	13	13	13	21.2	21.2	21.2	104.61	0	33.544	1372100000	650480000	721600000	4	2	2	1	2	0	2	3	2
Q62931	Q62931	Gosr1	ENSRNOG00000003971	Golgi SNAP receptor complex member 1	0.415557	-0.311449	1.6475	-0.135468	0.142027	0.974015	0.435371	0.194646	0.0520539	0.909451	0.142027	0.424421	0.435371	0.146069	0.676989	0.534677	1	0.0520539	0.789456	0.551353	63104300	0.399062	0.514071	0.959376	5	5	5	27.6	27.6	27.6	28.533	0	26.423	1422200000	596160000	826000000	0	2	1	1	1	1	2	2	2
D3ZJ50	D3ZJ50	Pkp3	ENSRNOG00000015152		0.555715	-1.2306	0.42664	0.550394	0.318105	0.359559	0.371958	1.19762	-0.337443	0.770033	0.42664	0.0233188	0.371958	0.146249	0.676989	0.643046	1	-0.337443	0.609869	0.431713	220806000	0.480317	1.26312	0.116228	24	24	24	39.5	39.5	39.5	89.896	0	91.228	4640200000	2251100000	2389100000	7	6	3	6	3	5	4	6	1
O08700	O08700	Vps45	ENSRNOG00000021173	Vacuolar protein sorting-associated protein 45	0.746227	-0.335444	-0.0200874	0.74321	-0.0883913	0.599415	0.965396	NaN	0.205391	0.768943	-0.0200874	0.510547	0.782406	0.146265	0.676989	0.782406	1	0.205391	0.848008	0.211577	217614000	0.258788	0.764857	0.461672	9	9	9	21.9	21.9	21.9	64.893	0	35.454	529690000	228910000	300780000	1	2	1	0	1	1	0	0	1
P29314	P29314;A0A0G2K4C4;D3ZV50;M0RB65	Rps9	ENSRNOG00000011355;ENSRNOG00000039203;ENSRNOG00000049813;ENSRNOG00000050067	40S ribosomal protein S9	-0.466118	-1.50381	-0.157138	0.276507	0.29378	-0.435617	-0.153014	-0.114374	-0.984964	0.308653	0.276507	0.449068	-0.153014	0.14671	0.678127	-0.234335	1	-0.984964	0.804894	0.137716	63044800	0.175383	0.73376	0.255497	14	14	14	45.4	45.4	45.4	22.591	0	82.103	144780000000	71701000000	73075000000	10	10	9	11	10	10	9	8	9
Q6P799	Q6P799;A0A0G2JZG7	Sars	ENSRNOG00000020255	Serine--tRNA ligase, cytoplasmic	-1.34979	-1.20231	-0.255038	0.420633	0.523095	-0.135944	-0.868414	-0.463969	-1.27605	0.0367486	0.420633	0.446261	-0.463969	0.147081	0.678127	-0.489442	1	-1.27605	0.802698	0.229564	230690000	0.366899	0.104286	0.422792	14	14	14	37.5	37.5	37.5	58.587	0	76.74	4547500000	2209100000	2338400000	3	2	3	1	4	2	3	5	0
Q6VEU1	Q6VEU1	Nob1	ENSRNOG00000021890	RNA-binding protein NOB1	-0.424685	-0.754406	-1.17662	0.161986	-0.864307	-0.547716	-0.146089	-0.188681	-0.589545	0.17359	-0.864307	0.261489	-0.188681	0.14719	0.678127	-0.294162	1	-0.589545	0.680756	-0.626313	49267200	0.220615	0.233148	0.700319	6	6	6	19	19	19	46.424	0	14.246	1318500000	694190000	624280000	2	3	2	2	2	3	1	1	1
D4A017	D4A017	Tmem87a	ENSRNOG00000008455		0.253738	0.255494	0.17207	0.692981	0.00495852	0.0250221	0.25753	0.204384	0.254616	0.0021958	0.17207	0.296539	0.204384	0.14738	0.678127	0.162312	1	0.254616	0.707698	0.290003	118677000	0.12183	0.00124198	0.358852	8	8	8	17	17	17	61.667	0	29.114	3963000000	1920800000	2042300000	4	4	4	3	3	4	4	2	3
A0A0G2JZH0	A0A0G2JZH0;D3ZJ77;A0A0G2JT45	Cab39	ENSRNOG00000017297		0.131471	-0.966905	0.241015	0.267445	0.377563	-0.196657	-0.852433	-0.333494	-0.417717	0.586034	0.267445	0.0194603	-0.333494	0.147398	0.678127	-0.460861	1	-0.417717	0.609869	0.295341	92563900	0.345945	0.776669	0.072422	12	12	11	38.7	38.7	36.7	39.873	0	50.257	3352300000	1637400000	1714900000	2	2	3	2	3	3	2	3	3
Q9Z2Q7	Q9Z2Q7	Stx8	ENSRNOG00000003849	Syntaxin-8	0.439036	-0.584629	-0.170975	0.0169185	0.125894	0.143396	0.389608	0.806695	-0.0727962	0.910059	0.0169185	0.923664	0.389608	0.147456	0.678127	0.446566	1	-0.0727962	1	-0.00938734	54258200	0.335298	0.72384	0.150172	6	6	6	33.9	33.9	33.9	26.91	0	39.251	1586400000	684040000	902390000	3	3	3	4	3	3	0	2	1
P08753	P08753;D4AA42;P29348	Gnai3	ENSRNOG00000005268;ENSRNOG00000019296;ENSRNOG00000019465	Guanine nucleotide-binding protein G(k) subunit alpha;Guanine nucleotide-binding protein G(t) subunit alpha-3	0.0672228	-0.0389367	0.010298	-0.137271	-0.215458	0.0333304	0.0270074	0.0990677	0.014143	0.834225	-0.137271	0.226753	0.0333304	0.147505	0.678127	0.0531352	1	0.014143	0.667493	-0.114144	230350000	0.0399042	0.0750661	0.114641	16	10	10	54.8	35.6	35.6	40.522	0	323.31	23008000000	11072000000	11936000000	8	10	8	8	8	9	9	8	8
Q6AYQ8	Q6AYQ8	Fahd1	ENSRNOG00000014727	Acylpyruvase FAHD1, mitochondrial	0.29863	-0.36537	-0.208249	0.331251	0.0780267	0.045244	0.494979	0.423417	-0.0333699	0.936226	0.0780267	0.709096	0.423417	0.147921	0.678861	0.321213	1	-0.0333699	0.985843	0.0670097	14031100	0.24166	0.469519	0.269919	3	3	3	27.6	27.6	27.6	24.48	0	12.537	552460000	231040000	321430000	1	2	1	2	1	1	0	2	0
G3V8T1	G3V8T1;A0A0G2K5D3	Mphosph8	ENSRNOG00000051238	M-phase phosphoprotein 8	0.536578	0.236347	0.378769	-0.502147	-0.278515	0.728441	0.239249	0.202512	0.386463	0.235865	-0.278515	0.662688	0.239249	0.148044	0.678861	0.390067	1	0.386463	0.956782	-0.133964	NaN	0.293615	0.212295	0.457902	11	11	11	16.3	16.3	16.3	96.782	0	22.659	921260000	427360000	493900000	3	4	2	3	3	2	3	0	1
D3ZGR7	D3ZGR7	Trir	ENSRNOG00000003863		0.388816	NaN	0.06226	NaN	0.607579	0.557378	0.343863	NaN	0.388816	1	0.334919	0.434991	0.450621	0.148093	0.678861	0.450621	1	0.388816	0.7941	0.334919	37118300	0.150978	NaN	0.385599	3	3	3	22.5	22.5	22.5	18.472	0	18.836	238960000	99985000	138980000	2	2	2	2	2	2	0	0	0
D4ABD7	D4ABD7	Trip11	ENSRNOG00000005292		0.323258	-0.414478	0.3288	1.19925	0.202805	0.518596	0.480872	0.0459838	-0.0456099	0.921681	0.3288	0.206856	0.480872	0.148344	0.678861	0.348484	1	-0.0456099	0.662306	0.576951	134957000	0.262651	0.521659	0.542593	14	14	14	10.7	10.7	10.7	225.97	0	92.59	2144700000	1011500000	1133200000	4	3	2	4	4	6	2	3	4
Q5XIH9	Q5XIH9	Hpdl	ENSRNOG00000018143	4-hydroxyphenylpyruvate dioxygenase-like protein	0.343578	-0.182251	-0.137	0.0763759	0.319477	0.0111618	0.0871827	0.0532075	0.0806636	0.810486	0.0763759	0.580086	0.0532075	0.148387	0.678861	0.0505173	1	0.0806636	0.899824	0.0862846	139472000	0.0380818	0.371818	0.2284	7	7	7	32.9	32.9	32.9	40.032	0	20.499	1593200000	731180000	862060000	3	2	2	3	2	0	1	2	2
G3V6H5	G3V6H5;P97700	Slc25a11	ENSRNOG00000003815	Mitochondrial 2-oxoglutarate/malate carrier protein	-0.149292	-0.62029	0.0994995	0.332835	0.122611	-0.367308	-0.100974	-0.121333	-0.384791	0.349638	0.122611	0.13028	-0.121333	0.148519	0.678861	-0.196538	1	-0.384791	0.639843	0.184982	57010900	0.148241	0.333046	0.128565	12	12	12	46.5	46.5	46.5	34.136	0	112	27257000000	13530000000	13728000000	10	10	10	7	10	8	8	11	8
Q4KMA2	Q4KMA2	Rad23b	ENSRNOG00000016137	UV excision repair protein RAD23 homolog B	0.106238	-0.835144	-0.364742	-0.217973	0.56619	0.68906	0.183369	0.233892	-0.364453	0.580551	-0.217973	0.986523	0.233892	0.148833	0.679645	0.368774	1	-0.364453	1	-0.0055082	76267600	0.278524	0.665658	0.500515	13	13	12	53.7	53.7	51.6	43.496	0	235.34	15938000000	9352500000	6585800000	5	4	3	4	3	3	5	5	1
A0A0G2K4R5	A0A0G2K4R5;D4AE75	Pop1	ENSRNOG00000005243		0.128898	0.191466	-0.165559	-0.231711	-0.231959	0.0255946	0.190723	0.111168	0.160182	0.122788	-0.231711	0.010913	0.111168	0.149218	0.680756	0.109162	1	0.160182	0.609869	-0.209743	73436500	0.0825824	0.0442423	0.0382646	23	23	23	35.4	35.4	35.4	113.25	0	123.85	6249200000	2870900000	3378300000	8	13	6	7	8	2	7	10	7
F1M0U5	F1M0U5	Nbas	ENSRNOG00000024503		-0.285878	-0.33408	0.963622	1.33004	0.268434	-0.287374	-0.854993	-0.227821	-0.309979	0.0493978	0.963622	0.11116	-0.287374	0.149673	0.682175	-0.45673	1	-0.309979	0.632999	0.854033	47240400	0.34619	0.0340838	0.539222	7	7	7	4.2	4.2	4.2	265.8	0	12.607	449630000	327170000	122470000	2	2	2	2	2	1	1	1	0
Q6PDV8	Q6PDV8;P47198	Rpl22		60S ribosomal protein L22	-0.355017	-1.18236	-0.102303	0.166795	0.192771	-0.259012	-0.206564	-0.023384	-0.76869	0.314301	0.166795	0.459253	-0.206564	0.149999	0.682575	-0.162987	1	-0.76869	0.811086	0.085754	NaN	0.123711	0.585022	0.163379	4	4	4	50.8	50.8	50.8	14.759	0	177.54	78765000000	37110000000	41654000000	3	3	3	3	4	3	3	3	3
Q9JMJ4	Q9JMJ4	Prpf19	ENSRNOG00000020897	Pre-mRNA-processing factor 19	0.31813	0.245927	-0.042014	-0.387545	-0.363162	0.799297	0.32267	0.172013	0.282029	0.08105	-0.363162	0.140946	0.32267	0.150046	0.682575	0.431327	1	0.282029	0.641577	-0.26424	234013000	0.327454	0.0510548	0.192839	18	18	18	63.1	63.1	63.1	55.238	0	323.31	146640000000	67128000000	79513000000	13	12	12	13	13	11	13	12	13
P62246	P62246;A0A0G2K6I0;D3ZLL8;D3ZS61;D3ZZC7;M0R8U6;A0A0G2JYA6;A0A0G2K2F6	Rps15a	ENSRNOG00000018320;ENSRNOG00000030447;ENSRNOG00000032877;ENSRNOG00000046896;ENSRNOG00000047766;ENSRNOG00000050001	40S ribosomal protein S15a	-0.401483	-1.31233	-0.227564	0.135926	0.310164	-0.345067	-0.126064	-0.0830288	-0.856904	0.310994	0.135926	0.690769	-0.126064	0.150528	0.683595	-0.18472	1	-0.856904	0.973523	0.0728419	87753400	0.140522	0.644063	0.274358	6	6	6	51.5	51.5	51.5	14.839	0	53.544	46567000000	24167000000	22400000000	5	5	3	4	4	5	4	4	4
P80254	P80254;A0A1W2Q637	Ddt	ENSRNOG00000001239	D-dopachrome decarboxylase	NaN	-2.94664	0.368815	0.557962	0.405023	-0.495471	NaN	-0.810345	-2.94664	1	0.405023	0.0166247	-0.652908	0.150634	0.683595	-0.652908	1	-2.94664	0.609869	0.443934	16016800	0.222649	NaN	0.100398	7	7	7	76.3	76.3	76.3	13.133	0	65.356	3539000000	1823400000	1715700000	1	0	0	0	0	0	1	2	2
Q64057	Q64057	Aldh7a1	ENSRNOG00000014645	Alpha-aminoadipic semialdehyde dehydrogenase	-0.0440947	-0.90978	0.0913579	0.290212	0.197863	-0.20067	-0.0209782	-0.13762	-0.476937	0.469169	0.197863	0.0782394	-0.13762	0.1507	0.683595	-0.119756	1	-0.476937	0.61309	0.193144	50814400	0.0911681	0.612132	0.0995112	20	20	20	48.2	48.2	48.2	58.748	0	214.26	26062000000	12096000000	13966000000	11	10	9	10	13	10	8	11	7
D3ZUJ8	D3ZUJ8	Tmtc3	ENSRNOG00000006749		NaN	1.52615	0.142266	0.321145	0.431035	-0.443164	-0.0386102	-0.358215	1.52615	1	0.321145	0.0712507	-0.358215	0.15088	0.68376	-0.279996	1	1.52615	0.609869	0.298148	40209700	0.213318	NaN	0.145751	7	7	7	10.1	10.1	10.1	104.06	0	8.8997	399060000	146320000	252750000	1	1	2	1	1	0	2	2	3
P23358	P23358;A0A140TAC5;M0R4B6;D3ZJE2;D4A8N3	Rpl12	ENSRNOG00000002211;ENSRNOG00000016220;ENSRNOG00000025014;ENSRNOG00000028993;ENSRNOG00000029115	60S ribosomal protein L12	-0.473408	-0.77469	-0.0644884	0.107451	0.154471	-0.262405	-0.130945	-0.0423299	-0.624049	0.150791	0.107451	0.42694	-0.130945	0.151069	0.683967	-0.145227	1	-0.624049	0.789456	0.065811	59772300	0.11073	0.213038	0.115266	7	7	7	58.8	58.8	58.8	17.845	0	323.31	91777000000	44233000000	47544000000	6	6	6	6	6	6	6	6	7
Q5XIB2	Q5XIB2;A0A0G2JXR7	Cwc27	ENSRNOG00000013252	Peptidyl-prolyl cis-trans isomerase CWC27 homolog	0.544996	-0.251197	-0.0932128	0.0378332	0.168592	0.817487	0.127403	0.414352	0.1469	0.774952	0.0378332	0.667065	0.414352	0.151899	0.685985	0.453081	1	0.1469	0.960252	0.0377375	53846100	0.346668	0.562993	0.130902	6	6	6	25.2	25.2	25.2	53.309	0	58.117	2311200000	951070000	1360100000	3	3	3	4	1	2	0	2	1
Q03114	Q03114	Cdk5	ENSRNOG00000008017	Cyclin-dependent-like kinase 5	NaN	-1.28976	-0.138045	0.429612	0.342468	-0.693582	-0.794881	-0.0638766	-1.28976	1	0.342468	0.353806	-0.693582	0.151982	0.685985	-0.517446	1	-1.28976	0.742885	0.211345	7294310	0.396055	NaN	0.305702	6	5	5	23.3	20.5	20.5	33.254	0	7.97	469630000	205790000	263840000	3	2	2	2	1	1	0	2	3
D3ZIM7	D3ZIM7	Fam177a1	ENSRNOG00000046391		0.359409	-1.5971	0.700529	0.959102	0.546857	-0.126537	NaN	-0.208072	-0.618847	0.640916	0.700529	0.0257178	-0.167305	0.152162	0.685985	-0.167305	1	-0.618847	0.609869	0.735496	85578000	0.0576544	1.38346	0.208335	3	3	3	17.8	17.8	17.8	23.638	0.00064419	4.1768	275110000	112140000	162970000	2	1	0	0	1	0	1	1	1
Q6JE36	Q6JE36;A0A1W2Q6A2;A0A1W2Q609;A0A1W2Q686	Ndrg1	ENSRNOG00000007393	Protein NDRG1	0.275844	-0.620648	-0.190677	0.0625198	-0.0122096	0.102832	0.485568	0.823631	-0.172402	0.76625	-0.0122096	0.596885	0.485568	0.152228	0.685985	0.470677	1	-0.172402	0.910593	-0.0467888	107684000	0.36063	0.633916	0.130092	9	9	9	42.4	42.4	42.4	42.954	0	207.73	7287900000	3465700000	3822100000	1	2	3	2	3	2	3	5	2
A0A0G2K283	A0A0G2K283;Q6TXG4	Dhx8	ENSRNOG00000020772		0.216483	0.284442	-0.0624462	-0.408818	-0.13476	0.485336	0.344069	0.0468142	0.250462	0.0858448	-0.13476	0.195589	0.344069	0.152284	0.685985	0.292073	1	0.250462	0.652429	-0.202008	89442400	0.223837	0.0480546	0.182716	28	27	27	30.6	29.9	29.9	142.29	0	129.25	3872100000	1884900000	1987100000	10	10	13	11	6	6	9	11	8
A0A0G2K7T6	A0A0G2K7T6;F1LS02;P37199	Nup155	ENSRNOG00000013411	Nuclear pore complex protein Nup155	0.206218	-0.193563	0.0313245	-0.212049	-0.279729	0.20708	0.0885547	0.0402573	0.00632734	0.979855	-0.212049	0.245648	0.0885547	0.152377	0.685985	0.111964	1	0.00632734	0.67008	-0.153485	77214000	0.0858397	0.282688	0.163588	40	40	40	43.8	43.8	43.8	155.05	0	323.31	41475000000	19575000000	21900000000	22	22	18	22	17	20	20	17	18
P51907	P51907	Slc1a1	ENSRNOG00000014816	Excitatory amino acid transporter 3	0.906121	NaN	NaN	NaN	NaN	-1.13434	NaN	-1.86949	0.906121	1	NaN	1	-1.50192	0.1528	0.686133	-1.50192	1	0.906121	1	NaN	254195000	0.519827	NaN	NaN	1	1	1	2.9	2.9	2.9	56.771	0.0032265	3.0087	19868000	11753000	8115000	1	1	0	0	1	0	1	0	0
D3ZTR5	D3ZTR5;M0R785;A0A0G2K6U2	Chchd2l2	ENSRNOG00000000918;ENSRNOG00000051180;ENSRNOG00000051286		0.0177603	-0.610432	0.341429	0.522723	-0.0327257	-0.0791016	-0.125467	-0.0140467	-0.296336	0.518517	0.341429	0.232216	-0.0791016	0.152813	0.686133	-0.0728718	1	-0.296336	0.668431	0.277142	32253300	0.0559708	0.444199	0.28325	6	6	6	10	10	10	84.034	0	323.31	84503000000	37878000000	46625000000	4	4	5	5	4	5	4	4	4
Q5XI01	Q5XI01;M0RC12;M0R7D1	Larp7	ENSRNOG00000048989	La-related protein 7	0.155316	0.137383	-0.524083	-0.189345	0.107089	0.314197	0.0553417	0.144158	0.14635	0.0389549	-0.189345	0.383065	0.144158	0.152842	0.686133	0.171232	1	0.14635	0.764209	-0.202113	251213000	0.131534	0.0126803	0.315779	14	14	14	30.3	30.3	30.3	64.949	0	50.408	2845000000	1340400000	1504600000	4	1	5	3	3	5	1	6	3
A0A0G2JU05	A0A0G2JU05;B2GV09	Llgl2	ENSRNOG00000004834		0.446407	0.15939	0.112712	-0.305115	-0.485025	0.0241002	0.259866	0.309855	0.302899	0.281676	-0.305115	0.330278	0.259866	0.153723	0.689121	0.197941	1	0.302899	0.72296	-0.225809	103882000	0.152611	0.202951	0.306658	40	40	40	56.9	56.9	56.9	119.65	0	323.31	52147000000	26221000000	25926000000	21	19	19	19	20	21	16	12	15
D3ZN95	D3ZN95	Hcfc1	ENSRNOG00000037264		0.41062	0.0761693	0.191177	-0.2775	0.0711241	0.538666	0.457287	0.041458	0.243395	0.383235	0.0711241	0.974521	0.457287	0.153796	0.689121	0.345804	1	0.243395	1	-0.00506632	152560000	0.266693	0.236492	0.243451	35	35	34	27.6	27.6	27.1	209.15	0	203.66	17884000000	7635200000	10249000000	19	15	11	13	14	15	12	15	9
F1M7P1	F1M7P1	Dcaf13	ENSRNOG00000004301		0.120108	0.487503	-0.303349	-0.694637	-0.569516	0.235457	0.0688001	0.461894	0.303805	0.346216	-0.569516	0.0454597	0.235457	0.154216	0.689941	0.255384	1	0.303805	0.609869	-0.5225	78209300	0.197303	0.259787	0.199836	11	11	11	33.9	33.9	33.9	51.367	0	114.31	8148200000	4084100000	4064100000	7	8	8	8	7	6	9	9	9
P38718-2	P38718-2;P38718	Mpc2	ENSRNOG00000003150	Mitochondrial pyruvate carrier 2	-0.0690761	-0.836566	0.070041	0.242536	0.0330741	-0.369905	-0.0364837	-0.248408	-0.452821	0.447553	0.070041	0.216189	-0.248408	0.154381	0.689941	-0.218266	1	-0.452821	0.667493	0.115217	88560600	0.168742	0.542698	0.1118	6	6	6	46.6	46.6	46.6	12.968	0	24.017	6446700000	3030100000	3416700000	6	6	5	5	5	4	4	2	4
M3ZCQ2	M3ZCQ2;F1LNJ2	Snrnp200	ENSRNOG00000012157	U5 small nuclear ribonucleoprotein 200 kDa helicase	0.010036	0.106577	-0.00250256	-0.32883	-0.288506	0.228291	0.0270172	0.135383	0.0583067	0.440228	-0.288506	0.18195	0.135383	0.15451	0.689941	0.13023	1	0.0583067	0.64808	-0.206613	126166000	0.100736	0.0682651	0.177911	105	105	105	61.9	61.9	61.9	244.53	0	323.31	280340000000	133590000000	146750000000	69	66	59	57	59	57	55	59	53
P18163	P18163	Acsl1	ENSRNOG00000010633	Long-chain-fatty-acid--CoA ligase 1	-0.123496	-0.723671	0.376527	0.381997	0.141687	-0.150351	-0.0365939	-0.274546	-0.423584	0.392396	0.376527	0.063148	-0.150351	0.154557	0.689941	-0.15383	1	-0.423584	0.609869	0.30007	48653000	0.119014	0.424388	0.137191	20	17	17	36.8	32.8	32.8	78.178	0	82.148	8153500000	4023700000	4129800000	9	8	9	10	8	10	7	7	10
G3V7T6	G3V7T6	Sf3b1	ENSRNOG00000013516		0.0447001	0.270941	-0.0471049	-0.429434	-0.239628	0.229645	0.0354446	0.350902	0.157821	0.395908	-0.239628	0.163029	0.229645	0.154967	0.690931	0.20533	1	0.157821	0.64184	-0.238722	61275800	0.159128	0.159977	0.191166	65	65	65	65	65	65	145.83	0	323.31	195720000000	94789000000	100930000000	35	37	38	38	38	39	43	40	43
F1LQ48	F1LQ48;F2Z3R2;F1LQ48-2;F1M040	Hnrnpl	ENSRNOG00000005062;ENSRNOG00000020235		0.254592	0.299577	0.0324748	-0.544574	-0.490921	0.624568	0.186954	0.177181	0.277085	0.0515651	-0.490921	0.210943	0.186954	0.155075	0.690931	0.329568	1	0.277085	0.666864	-0.33434	44216600	0.255524	0.0318093	0.318802	28	28	28	66.8	66.8	66.8	67.902	0	323.31	321190000000	151330000000	169860000000	18	20	18	21	18	18	17	20	18
D4ACL0	D4ACL0	Hoxc11	ENSRNOG00000016141		-0.381536	NaN	-0.323205	-0.436906	-0.51321	-0.467631	-0.778198	NaN	-0.381536	1	-0.436906	0.0164981	-0.622914	0.15553	0.690931	-0.622914	1	-0.381536	0.609869	-0.424441	142357000	0.219603	NaN	0.0956137	1	1	1	8.9	8.9	8.9	33.707	0.00044014	4.6202	82876000	41990000	40886000	1	1	1	1	0	1	0	0	0
D4ADZ9	D4ADZ9	Pus7	ENSRNOG00000010572		-0.584537	-1.09514	-0.136257	0.79517	0.559051	-0.0882665	-0.456735	-0.189644	-0.839839	0.187875	0.559051	0.283575	-0.189644	0.155685	0.690931	-0.244882	1	-0.839839	0.697885	0.405988	7897730	0.190344	0.361052	0.484211	22	22	22	50.5	50.5	50.5	74.64	0	129.33	5478600000	2597200000	2881400000	5	4	5	5	5	2	3	6	1
P70581-4	P70581-4;P70581;P70581-2;D3ZVG3;P70581-3	Nupl1	ENSRNOG00000012644	Nucleoporin p58/p45	-0.0636395	0.108039	-0.214021	-0.683626	-0.216068	0.526757	0.0771263	0.793985	0.0222	0.838886	-0.216068	0.140624	0.526757	0.155748	0.690931	0.465956	1	0.0222	0.641577	-0.371238	44324100	0.362276	0.121395	0.270538	7	7	7	21.9	21.9	21.9	48.579	0	50.137	4940300000	2405600000	2534700000	4	2	3	2	2	2	1	1	3
F1LP81	F1LP81;B2RYD2-2;B2RYD2	Esrp1	ENSRNOG00000008184	Epithelial splicing regulatory protein 1	-0.26688	-0.0749578	-0.312613	-0.21205	-0.10832	0.185603	0.0170832	0.228539	-0.170919	0.325686	-0.21205	0.0700228	0.185603	0.155776	0.690931	0.143742	1	-0.170919	0.609869	-0.210995	29303700	0.111771	0.13571	0.102151	15	15	14	40.8	40.8	39.1	75.505	0	177.49	10775000000	4951700000	5823500000	7	8	5	6	3	4	5	5	3
D4A6W6	D4A6W6;P62919	Rpl8	ENSRNOG00000031381;ENSRNOG00000032635;ENSRNOG00000048456;ENSRNOG00000048523	60S ribosomal protein L8	-0.501116	-1.41786	-0.0439614	0.129198	0.194383	-0.340911	-0.126619	-0.0755697	-0.959487	0.283722	0.129198	0.320279	-0.126619	0.155816	0.690931	-0.181033	1	-0.959487	0.720403	0.0932066	118226000	0.140791	0.648234	0.123181	8	8	8	37	37	37	28.156	0	308.41	66030000000	33281000000	32749000000	5	4	5	5	5	4	4	5	4
[truncated: 3,688 more rows]
[truncated: 16 more columns]
