# Supplementary material for: Proteomic analysis reveals mechanisms underlying increased efficacy of bleomycin by photochemical internalization in bladder cancer cells
Source: Royal Society of Chemistry journal article supplement (doi:10.1039/d2mo00337f), 2023-06-22
Supplement: d2mo00337f4.pdf [file d2mo00337f4.pdf]

**Table S2. GOrilla analysis of SILAC data.** Most significantly affected biological processes, molecular functions and cellular components reported from GOrilla analysis (GO Ontology database released 2022-07-01, single ranked list, arbitrary cut-off)

| Treatment                 |                                                           | P-value  | FDR      | Enrichment |
|---------------------------|-----------------------------------------------------------|----------|----------|------------|
| <b>Upregulated</b>        |                                                           |          |          |            |
| <b>Biological process</b> |                                                           |          |          |            |
| PDT                       | Regulation of transcription, DNA-templated                | 2.58E-17 | 2.87E-13 | 1.58       |
| BLM                       | Small molecule biosynthetic process                       | 1.78E-12 | 1.97E-8  | 2.42       |
| BLM <sub>PCI</sub>        | Regulation of transcription by RNA Polymerase II          | 2.78E-19 | 3.02E-15 | 1.76       |
| <b>Molecular function</b> |                                                           |          |          |            |
| PDT                       | DNA binding                                               | 8.33E-19 | 2.4E-15  | 1.80       |
| BLM                       | Identical protein binding                                 | 2.63E-9  | 7.58E-6  | 1.42       |
| BLM <sub>PCI</sub>        | DNA binding                                               | 5.49E-19 | 1.55E-15 | 1.85       |
| <b>Cellular component</b> |                                                           |          |          |            |
| PDT                       | Nuclear part                                              | 3.67E-28 | 5.79E-25 | 1.39       |
| BLM                       | Cytoplasm                                                 | 4.53E-14 | 7.14E-11 | 1.31       |
| BLM <sub>PCI</sub>        | Nuclear Part                                              | 8.54E-39 | 1.33E-35 | 1.44       |
| <b>Downregulated</b>      |                                                           |          |          |            |
| <b>Biological process</b> |                                                           |          |          |            |
| PDT                       | small molecule biosynthetic process                       | 6.13E-14 | 6.8E-10  | 2.88       |
| BLM                       | rRNA metabolic process                                    | 1.44E-30 | 1.6E-26  | 3.44       |
| BLM <sub>PCI</sub>        | nucleobase-containing small molecule biosynthetic process | 6.72E-10 | 7.46E-6  | 2.97       |
| <b>Molecular function</b> |                                                           |          |          |            |
| PDT                       | translation factor activity, RNA binding                  | 4.52E-12 | 1.3E-8   | 3.12       |
| BLM                       | Nucleic acid binding                                      | 6.91E-25 | 1.99E-21 | 1.56       |
| BLM <sub>PCI</sub>        | Catalytic activity                                        | 1.03E-8  | 2.98E-5  | 1.27       |
| <b>Cellular component</b> |                                                           |          |          |            |
| PDT                       | Cytosol                                                   | 1.27E-28 | 2E-25    | 1.51       |
| BLM                       | Nucleolus                                                 | 1.26E-42 | 1.99E-39 | 2.56       |
| BLM <sub>PCI</sub>        | Cytoplasmic part                                          | 2.87E-11 | 4.53E-8  | 1.14       |
